# Supplementary material for: Syntheses of highly functionalized cyclobutenes via [2 + 1 + 1] cycloaddition of isocyanides and an unprecedented ring expansion
Source: Royal Society of Chemistry journal article supplement (doi:10.1039/d4qo01518e), 2024-01-01
Supplement: d4qo01518e1.pdf [file d4qo01518e1.pdf]

**Syntheses of highly functionalized cyclobutenes via [2+1+1] cycloadditions of isocyanides and an unprecedented ring expansion**

Xiang Han, Xing Ma, Jiulong Yu, Dong Xiong, Wei Du, Ya-Wen Wang, Yin Tian,\*  
Yangyang Cheng\* and Jianfeng Zheng\*

## Contents

|                                                                                               |     |
|-----------------------------------------------------------------------------------------------|-----|
| 1. General information .....                                                                  | 3   |
| 2. Preparing of 3-methyleneoxindoles <b>4</b> .....                                           | 4   |
| 3. Optimization of reaction conditions.....                                                   | 7   |
| 4. Catalytic enantioselective variant .....                                                   | 9   |
| 5. General procedure and spectral data of products <b>3</b> .....                             | 11  |
| 6. General procedure and spectral data of products <b>5</b> .....                             | 24  |
| 7. General procedure and spectral data of products <b>6</b> .....                             | 38  |
| 8. Experimental procedure for the scale-up reaction and transformations of the products ..... | 42  |
| 9. X-ray crystallographic data of <b>3aa</b> , <b>5aa</b> and <b>6a</b> .....                 | 47  |
| 10. A plausible mechanism. ....                                                               | 51  |
| 11. Quantum chemical calculations. ....                                                       | 52  |
| 12. Photophysical properties of <b>6a</b> .....                                               | 69  |
| 13. Copy of NMR spectra .....                                                                 | 70  |
| 14. References.....                                                                           | 165 |

## 1. General information

Reactions were carried out using commercial reagents in over-dried apparatus. Et<sub>2</sub>O was dried over powdered Na and distilled under nitrogen just before use. <sup>1</sup>H NMR spectra were recorded on commercial instruments (400 MHz and 600 MHz). Chemical shifts are recorded in ppm relative to tetramethylsilane and with the solvent resonance as the internal standard (CDCl<sub>3</sub>, δ = 7.26 ppm; DMSO-*d*<sub>6</sub>, δ = 2.50 ppm). Spectra are reported as follows: chemical shift, multiplicity (s = singlet, d = doublet, t = triplet, m = multiplet), coupling constants (Hz), integration and assignment. <sup>13</sup>C NMR data were collected on commercial instruments (101 MHz and 151 MHz) with complete proton decoupling. Chemical shifts are reported in ppm from the tetramethylsilane with the solvent resonance as internal standard (CDCl<sub>3</sub>, δ = 77.0 ppm; DMSO-*d*<sub>6</sub>, δ = 39.5 ppm). <sup>19</sup>F NMR data were collected on commercial instruments (376 MHz and 565 MHz) with complete proton decoupling. Melting points (m. p.) were measured on the electrothermal digital melting point apparatus. HRMS was recorded on a commercial apparatus (ESI Source). All isocyanides **1**<sup>1</sup> and alkylidene malonates **2**<sup>2</sup> were prepared according to the literature.

## 2. Preparing of 3-methyleneoxindoles **4**.

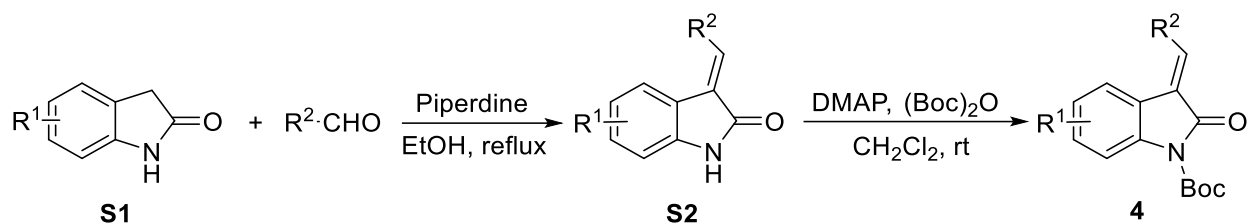

**S1 to S2:** The aldehyde (1.2 equiv.) was added to a solution of **S1** (1.0 equiv., 133 mg) in EtOH (5 mL), finally piperidine (10 mol%) was added. The reaction was refluxed for 24 h, then it was cooled to room temperature and the solvent was removed under reduced pressure. The product **S2** was purified by flash chromatography on silica gel (petroleum ether/ethyl acetate = 4/1).

**S2 to 4:** The **S2** was dissolved in CH<sub>2</sub>Cl<sub>2</sub> (5 mL), and DMAP (5 mol%) was added. Then (Boc)<sub>2</sub>O (1.1 equiv.) was added. The reaction mixture was stirred at room temperature for 1 h. After the reaction was completed, the solvent was removed under reduced pressure and the product **4** was purified by flash chromatography on silica gel (petroleum ether/ethyl acetate = 30/1).

3-methyleneoxindoles **4a**,<sup>3a</sup> **4b**,<sup>3b</sup> **4c**,<sup>3c</sup> **4f**,<sup>3d</sup> and **4g**,<sup>3a</sup> are known compounds.

### Benzyl (*E*)-3-(2,2-dimethylpropylidene)-2-oxindoline-1-carboxylate **4d**

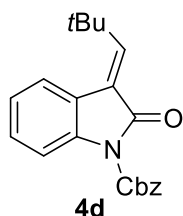

Yellow solid.  $R_f = 0.4$  (PE:EA = 30:1), m.p. 89–91 °C.

<sup>1</sup>H NMR (600 MHz, CDCl<sub>3</sub>)  $\delta$  8.00 (dd,  $J = 8.3, 1.2$  Hz, 1H), 7.73 (dd,  $J = 7.7, 1.3$  Hz, 1H), 7.53 – 7.48 (m, 2H), 7.39 – 7.34 (m, 2H), 7.33 – 7.27 (m, 2H), 7.16 (td,  $J = 7.7, 1.2$  Hz, 1H), 5.43 (s, 2H), 1.37 (s, 9H).

<sup>13</sup>C NMR (101 MHz, CDCl<sub>3</sub>)  $\delta$  166.6, 154.6, 150.8, 139.6, 135.1, 129.0, 128.5, 128.2, 127.8, 126.0, 125.2, 123.9, 121.0, 115.1, 68.3, 32.7, 29.0.

HRMS (ESI-TOF) calcd for C<sub>21</sub>H<sub>22</sub>NO<sub>3</sub><sup>+</sup> ([M+H<sup>+</sup>]) = 336.1594, Found 336.1597.

### 2,2,2-trichloroethyl (*E*)-3-(2,2-dimethylpropylidene)-2-oxindoline-1-carboxylate **4e**

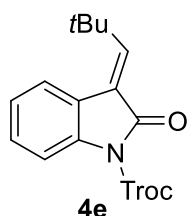

Yellow solid.  $R_f = 0.4$  (PE:EA = 30:1), m.p. 77–78 °C.

<sup>1</sup>H NMR (400 MHz, CDCl<sub>3</sub>)  $\delta$  8.05 (d,  $J = 8.1$  Hz, 1H), 7.78 (d,  $J = 7.6$  Hz, 1H), 7.39 – 7.28 (m, 2H), 7.23 (td,  $J = 7.9, 1.7$  Hz, 1H), 5.03 (d,  $J = 2.2$  Hz, 2H), 1.39 (s, 9H).

<sup>13</sup>C NMR (101 MHz, CDCl<sub>3</sub>)  $\delta$  166.3, 155.4, 149.4, 138.9, 129.2, 126.2, 124.9, 124.4, 121.3, 115.3, 94.2, 75.6, 32.8, 29.0.

HRMS (ESI-TOF) calcd for  $C_{16}H_{17}Cl_3NO_3^+$  ( $[M+H]^+$ ) = 376.0269, Found 376.0268.

**Tert-butyl (*E*)-5-bromo-3-(2,2-dimethylpropylidene)-2-oxoindoline-1-carboxylate 4h**

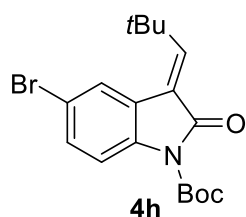

Yellow yield  $R_f = 0.4$  (PE:EA = 30:1), m.p. 60–62 °C.

$^1H$  NMR (400 MHz,  $CDCl_3$ )  $\delta$  7.87 – 7.79 (m, 2H), 7.42 (dt,  $J = 8.8, 2.0$  Hz, 1H), 7.27 (d,  $J = 1.8$  Hz, 1H), 1.62 (s, 9H), 1.37 (s, 9H).

$^{13}C$  NMR (101 MHz,  $CDCl_3$ )  $\delta$  166.2, 156.1, 149.2, 139.0, 131.6, 128.7, 124.6, 122.9, 116.7, 116.6, 84.4, 33.0, 29.2, 28.1.

HRMS (ESI-TOF) calcd for  $C_{18}H_{22}BrNNaO_3^+$  ( $[M+Na]^+$ ) = 402.0675, Found 402.0671.

**Tert-butyl (*E*)-3-(2,2-dimethylpropylidene)-5-methyl-2-oxoindoline-1 carboxylate 4i**

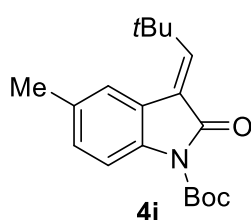

Yellow solid.  $R_f = 0.4$  (PE:EA = 30:1), m.p. 62–64 °C.

$^1H$  NMR (400 MHz,  $CDCl_3$ )  $\delta$  7.80 (d,  $J = 8.3$  Hz, 1H), 7.54 – 7.51 (m, 1H), 7.20 (s, 1H), 7.11 (dd,  $J = 8.4, 1.2$  Hz, 1H), 2.37 (s, 3H), 1.62 (s, 9H), 1.38 (s, 9H).

$^{13}C$  NMR (151 MHz,  $CDCl_3$ )  $\delta$  167.2, 153.9, 149.4, 137.8, 133.0, 129.5, 126.6, 125.6, 120.9, 114.7, 83.8, 32.7, 29.1, 28.1, 21.3.

HRMS (ESI-TOF) calcd for  $C_{19}H_{25}NNaO_3^+$  ( $[M+Na]^+$ ) = 338.1727, Found 338.1722.

**Tert-butyl (*E*)-6-chloro-3-(2,2-dimethylpropylidene)-2-oxoindoline-1-carboxylate 4j**

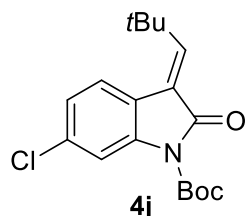

Yellow solid.  $R_f = 0.4$  (PE:EA = 30:1), m.p. 105–107 °C.

$^1H$  NMR (400 MHz,  $CDCl_3$ )  $\delta$  8.01 (d,  $J = 2.1$  Hz, 1H), 7.63 (dd,  $J = 8.3, 2.0$  Hz, 1H), 7.23 (s, 1H), 7.13 (dt,  $J = 8.3, 2.1$  Hz, 1H), 1.63 (s, 9H), 1.36 (s, 9H).

$^{13}C$  NMR (101 MHz,  $CDCl_3$ )  $\delta$  166.6, 154.8, 149.1, 140.9, 135.0, 126.6, 124.7, 123.7, 119.4, 115.7, 84.5, 32.8, 29.1, 28.0.

HRMS (ESI-TOF) calcd for  $C_{18}H_{22}ClNNaO_3^+$  ( $[M+Na]^+$ ) = 358.1180, Found 358.1178.

**Tert-butyl (*E*)-6-bromo-3-(2,2-dimethylpropylidene)-2-oxoindoline-1-carboxylate 4k**

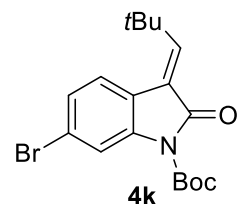

Yellow solid.  $R_f = 0.4$  (PE:EA = 30:1), m.p. 128–129 °C.

$^1H$  NMR (400 MHz,  $CDCl_3$ )  $\delta$  8.20 (d,  $J = 1.8$  Hz, 1H), 7.60 (d,  $J = 8.3$  Hz, 1H), 7.33 (dt,  $J = 8.3, 1.3$  Hz, 1H), 7.28 (s, 1H), 1.66 (s, 9H), 1.39 (s, 9H).

$^{13}C$  NMR (101 MHz,  $CDCl_3$ )  $\delta$  166.5, 155.1, 149.1, 141.0, 126.9, 126.7, 124.8, 123.1, 119.9, 118.5, 84.5, 32.9, 29.1, 28.1.

HRMS (ESI-TOF) calcd for  $C_{18}H_{22}BrNNaO_3^+$  ( $[M+Na]^+$ ) = 402.0675, Found 402.0673.

**Tert-butyl (*E*)-7-bromo-3-(2,2-dimethylpropylidene)-2-oxoindoline-1-carboxylate 4l**

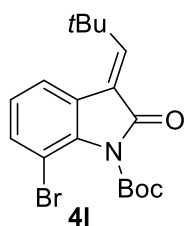

Yellow solid.  $R_f = 0.4$  (PE:EA = 30:1), m.p. 51–52 °C.

$^1\text{H}$  NMR (400 MHz,  $\text{CDCl}_3$ )  $\delta$  7.67 (d,  $J = 7.7$  Hz, 1H), 7.46 (d,  $J = 8.2$  Hz, 1H), 7.25 (s, 1H), 7.02 (t,  $J = 8.0$  Hz, 1H), 1.64 (s, 9H), 1.37 (s, 9H).

$^{13}\text{C}$  NMR (101 MHz,  $\text{CDCl}_3$ )  $\delta$  167.6, 156.0, 148.3, 139.1, 133.6, 125.4, 125.1, 124.5, 124.2, 106.9, 85.2, 32.9, 29.1, 27.7.

HRMS (ESI-TOF) calcd for  $\text{C}_{18}\text{H}_{23}\text{BrNO}_3^+$  ( $[\text{M}+\text{H}^+]$ ) = 380.0856, Found 380.0854.

### 3. Optimization of reaction conditions

Table 1. Screening of reaction conditions for cycloaddition between isocyanide and alkylidene malonate

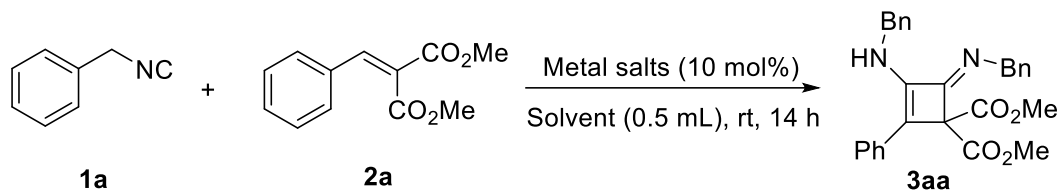

| Entry <sup>a</sup> | Metal salts          | Solvent                              | <b>1a:2a</b> | Yield (%) <sup>b</sup> <b>3aa</b> |
|--------------------|----------------------|--------------------------------------|--------------|-----------------------------------|
| 1                  | –                    | EtOAc                                | 2:1          | 0                                 |
| 2                  | La(OTf) <sub>3</sub> | EtOAc                                | 2:1          | 74                                |
| 3                  | Yb(OTf) <sub>3</sub> | EtOAc                                | 2:1          | 44                                |
| 4                  | Mg(OTf) <sub>2</sub> | EtOAc                                | 2:1          | 42                                |
| 5                  | Fe(OTf) <sub>3</sub> | EtOAc                                | 2:1          | 0                                 |
| 6                  | Ni(OTf) <sub>2</sub> | EtOAc                                | 2:1          | 0                                 |
| 7                  | Cu(OTf) <sub>2</sub> | EtOAc                                | 2:1          | 0                                 |
| 8                  | Zn(OTf) <sub>2</sub> | EtOAc                                | 2:1          | 19                                |
| 9                  | AgOTf                | EtOAc                                | 2:1          | 0                                 |
| 10                 | Al(OTf) <sub>3</sub> | EtOAc                                | 2:1          | 0                                 |
| 11                 | In(OTf) <sub>3</sub> | EtOAc                                | 2:1          | 20                                |
| 12                 | Y(OTf) <sub>3</sub>  | EtOAc                                | 2:1          | 82                                |
| 13                 | Y(OTf) <sub>3</sub>  | CHCl <sub>3</sub>                    | 2:1          | 63                                |
| 14                 | Y(OTf) <sub>3</sub>  | ClCH <sub>2</sub> CH <sub>2</sub> Cl | 2:1          | 76                                |
| 15                 | Y(OTf) <sub>3</sub>  | THF                                  | 2:1          | 67                                |
| 16                 | Y(OTf) <sub>3</sub>  | Toluene                              | 2:1          | 0                                 |
| 17                 | Y(OTf) <sub>3</sub>  | CH <sub>2</sub> Cl <sub>2</sub>      | 2:1          | 77                                |
| 18                 | Y(OTf) <sub>3</sub>  | 1,4-Dioxane                          | 2:1          | 14                                |
| 19                 | Y(OTf) <sub>3</sub>  | CH <sub>3</sub> CN                   | 2:1          | 7                                 |
| 20                 | Y(OTf) <sub>3</sub>  | Et <sub>2</sub> O                    | 2:1          | 88                                |
| 21                 | Y(OTf) <sub>3</sub>  | Et <sub>2</sub> O                    | 3:1          | 72                                |
| 22                 | Y(OTf) <sub>3</sub>  | Et <sub>2</sub> O                    | 4:1          | 51                                |
| 23                 | Y(OTf) <sub>3</sub>  | Et <sub>2</sub> O                    | 3:2          | 82                                |

<sup>a</sup>Unless otherwise noted, the reactions were performed with metal salts (10 mol%), **1a** (0.2 mmol) and **2a** (0.10 mmol) in indicated solvent (0.5 mL) at rt for 14 h. <sup>b</sup>The yield of isolated product for **3aa**.

Table 2. Screening of reaction conditions for cycloaddition between isocyanide and 3-methyleneoxindole

Reaction scheme: **1a** (0.2 mmol) + **4a** (0.2 mmol)  $\xrightarrow[\text{Solvent (0.5 mL), rt, 14 h}]{\text{Metal salts (10 mol\%)}}$  **5aa**

| Entry <sup>a</sup> | Catalyst             | Solvent                              | Yield (%) <sup>b</sup> <b>5aa</b> |
|--------------------|----------------------|--------------------------------------|-----------------------------------|
| 1                  | -                    | Et <sub>2</sub> O                    | N.D.                              |
| 2                  | Cu(OTf) <sub>2</sub> | Et <sub>2</sub> O                    | N.D.                              |
| 3                  | Sc(OTf) <sub>3</sub> | Et <sub>2</sub> O                    | 40                                |
| 4                  | La(OTf) <sub>3</sub> | Et <sub>2</sub> O                    | 83                                |
| 5                  | Zn(OTf) <sub>2</sub> | Et <sub>2</sub> O                    | 17                                |
| 6                  | Mg(OTf) <sub>2</sub> | Et <sub>2</sub> O                    | 49                                |
| 7                  | Y(OTf) <sub>3</sub>  | Et <sub>2</sub> O                    | 71                                |
| 8                  | Yb(OTf) <sub>3</sub> | Et <sub>2</sub> O                    | 62                                |
| 9                  | Bi(OTf) <sub>3</sub> | Et <sub>2</sub> O                    | N.D.                              |
| 10                 | Fe(OTf) <sub>3</sub> | Et <sub>2</sub> O                    | N.D.                              |
| 11                 | Pr(OTf) <sub>3</sub> | Et <sub>2</sub> O                    | 67                                |
| 12                 | Ni(OTf) <sub>2</sub> | Et <sub>2</sub> O                    | N.D.                              |
| 13                 | Tm(OTf) <sub>3</sub> | Et <sub>2</sub> O                    | 21                                |
| 14                 | Gd(OTf) <sub>3</sub> | Et <sub>2</sub> O                    | 48                                |
| 15                 | Tb(OTf) <sub>3</sub> | Et <sub>2</sub> O                    | 49                                |
| 16                 | La(OTf) <sub>3</sub> | CHCl <sub>3</sub>                    | 65                                |
| 17                 | La(OTf) <sub>3</sub> | Toluene                              | 69                                |
| 18                 | La(OTf) <sub>3</sub> | THF                                  | 52                                |
| 19                 | La(OTf) <sub>3</sub> | EtOAc                                | 49                                |
| 20                 | La(OTf) <sub>3</sub> | CH <sub>3</sub> CN                   | 45                                |
| 21                 | La(OTf) <sub>3</sub> | 1,4-Dioxane                          | 51                                |
| 22                 | La(OTf) <sub>3</sub> | CH <sub>2</sub> Cl <sub>2</sub>      | 62                                |
| 23                 | La(OTf) <sub>3</sub> | ClCH <sub>2</sub> CH <sub>2</sub> Cl | 62                                |

<sup>a</sup>Unless otherwise noted, the reactions were performed with metal salts (10 mol%), **1a** (0.2 mmol) and **4a** (0.10 mmol) in indicated solvent (0.5 mL) at rt for 14 h. <sup>b</sup>The yield of isolated product for **5aa**.



#### 4. Catalytic enantioselective variant

Table 3. Screening of reaction conditions for catalytic enantioselective cycloaddition between isocyanide and 3- methyleneoxindole

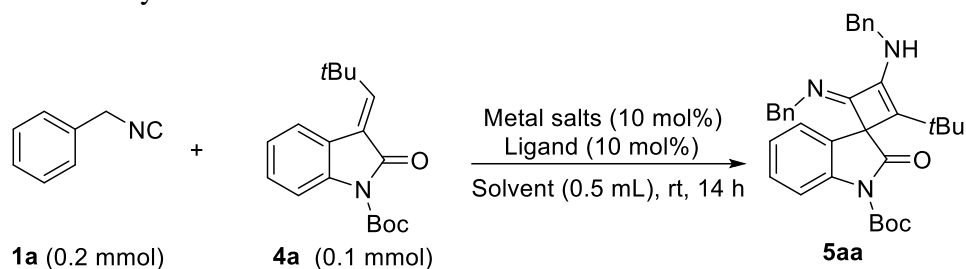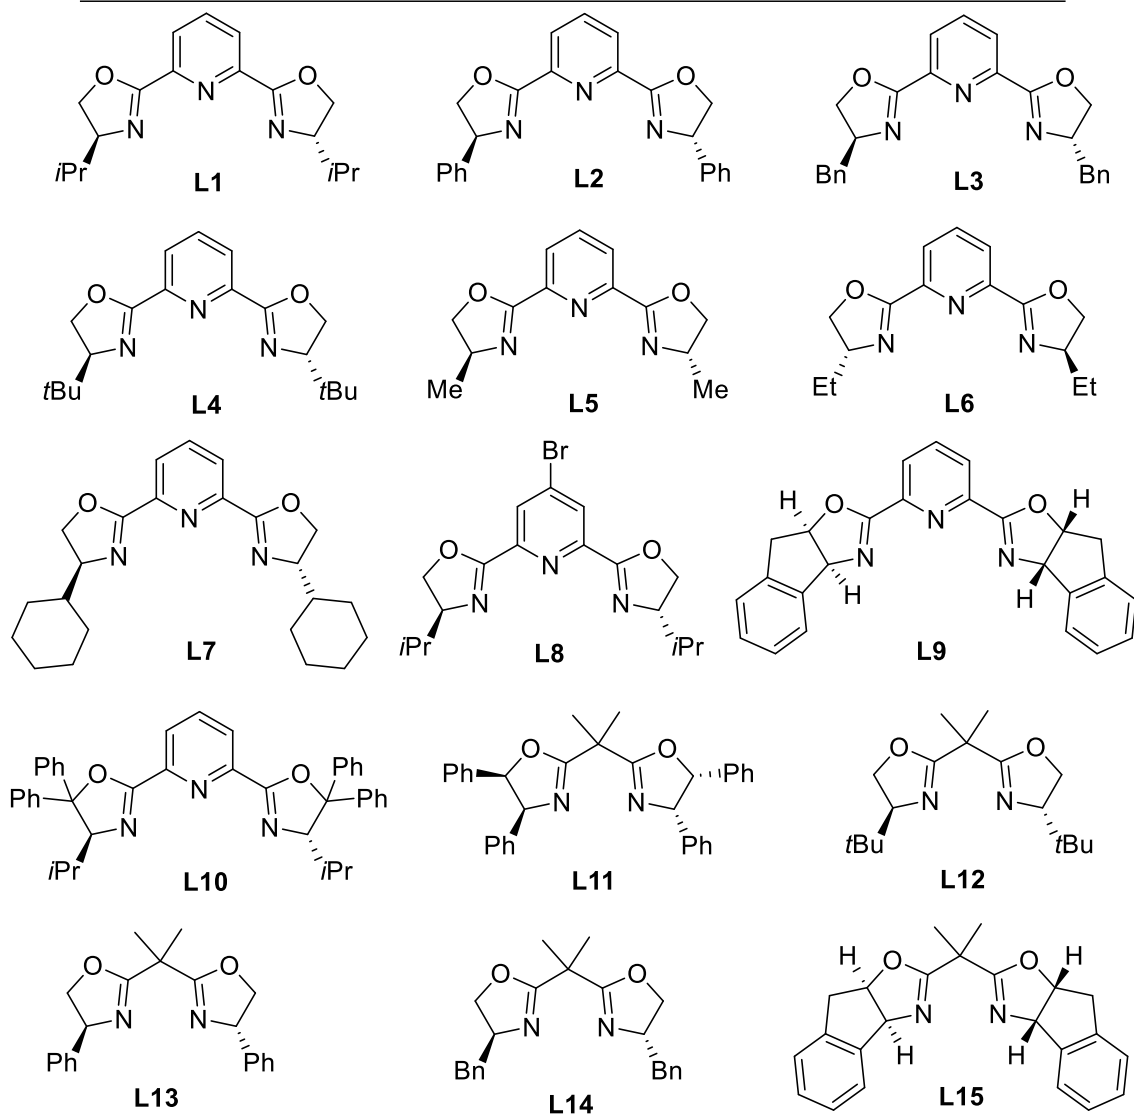

| Entry <sup>a</sup> | Metal salts          | Ligand    | Solvents          | Yield (%) <sup>b</sup> <b>5aa</b> | <i>ee</i> <sup>c</sup> ( <b>5aa</b> ) |
|--------------------|----------------------|-----------|-------------------|-----------------------------------|---------------------------------------|
| 1                  | Y(OTf) <sub>3</sub>  | <b>L1</b> | Et <sub>2</sub> O | 65                                | 51                                    |
| 2                  | Pr(OTf) <sub>3</sub> | <b>L1</b> | Et <sub>2</sub> O | 60                                | 17                                    |
| 3                  | La(OTf) <sub>3</sub> | <b>L1</b> | Et <sub>2</sub> O | 64                                | 23                                    |
| 4                  | Yb(OTf) <sub>3</sub> | <b>L1</b> | Et <sub>2</sub> O | 65                                | 68                                    |
| 5                  | Gd(OTf) <sub>3</sub> | <b>L1</b> | Et <sub>2</sub> O | 49                                | 45                                    |

|                 |                      |            |                                      |    |    |
|-----------------|----------------------|------------|--------------------------------------|----|----|
| 6               | Yb(OTf) <sub>3</sub> | <b>L2</b>  | Et <sub>2</sub> O                    | 59 | 30 |
| 7               | Yb(OTf) <sub>3</sub> | <b>L3</b>  | Et <sub>2</sub> O                    | 65 | 19 |
| 8               | Yb(OTf) <sub>3</sub> | <b>L4</b>  | Et <sub>2</sub> O                    | 58 | 20 |
| 9               | Yb(OTf) <sub>3</sub> | <b>L5</b>  | Et <sub>2</sub> O                    | 71 | 14 |
| 10              | Yb(OTf) <sub>3</sub> | <b>L6</b>  | Et <sub>2</sub> O                    | 81 | 36 |
| 11              | Yb(OTf) <sub>3</sub> | <b>L7</b>  | Et <sub>2</sub> O                    | 60 | 45 |
| 12              | Yb(OTf) <sub>3</sub> | <b>L8</b>  | Et <sub>2</sub> O                    | 68 | 30 |
| 13              | Yb(OTf) <sub>3</sub> | <b>L9</b>  | Et <sub>2</sub> O                    | 66 | 15 |
| 14              | Yb(OTf) <sub>3</sub> | <b>L10</b> | Et <sub>2</sub> O                    | 62 | 0  |
| 15              | Yb(OTf) <sub>3</sub> | <b>L11</b> | Et <sub>2</sub> O                    | 71 | 0  |
| 16              | Yb(OTf) <sub>3</sub> | <b>L12</b> | Et <sub>2</sub> O                    | 61 | 0  |
| 17              | Yb(OTf) <sub>3</sub> | <b>L13</b> | Et <sub>2</sub> O                    | 70 | 0  |
| 18              | Yb(OTf) <sub>3</sub> | <b>L14</b> | Et <sub>2</sub> O                    | 64 | 0  |
| 19              | Yb(OTf) <sub>3</sub> | <b>L15</b> | Et <sub>2</sub> O                    | 66 | 0  |
| 20              | Yb(OTf) <sub>3</sub> | <b>L1</b>  | Toluene                              | 70 | 43 |
| 21              | Yb(OTf) <sub>3</sub> | <b>L1</b>  | THF                                  | 50 | 55 |
| 22              | Yb(OTf) <sub>3</sub> | <b>L1</b>  | EtOAc                                | 47 | 60 |
| 23              | Yb(OTf) <sub>3</sub> | <b>L1</b>  | CH <sub>3</sub> CN                   | 38 | 20 |
| 24              | Yb(OTf) <sub>3</sub> | <b>L1</b>  | 1,4-Dioxane                          | 44 | 51 |
| 25              | Yb(OTf) <sub>3</sub> | <b>L1</b>  | CH <sub>2</sub> Cl <sub>2</sub>      | 50 | 45 |
| 26              | Yb(OTf) <sub>3</sub> | <b>L1</b>  | CHCl <sub>3</sub>                    | 61 | 46 |
| 27              | Yb(OTf) <sub>3</sub> | <b>L1</b>  | ClCH <sub>2</sub> CH <sub>2</sub> Cl | 51 | 39 |
| 28 <sup>d</sup> | Yb(OTf) <sub>3</sub> | <b>L1</b>  | Et <sub>2</sub> O                    | 63 | 56 |
| 29 <sup>e</sup> | Yb(OTf) <sub>3</sub> | <b>L1</b>  | Et <sub>2</sub> O                    | 60 | 61 |
| 30 <sup>f</sup> | Yb(OTf) <sub>3</sub> | <b>L1</b>  | Et <sub>2</sub> O                    | 59 | 57 |
| 31 <sup>g</sup> | Yb(OTf) <sub>3</sub> | <b>L1</b>  | Et <sub>2</sub> O                    | 59 | 65 |
| 32 <sup>h</sup> | Yb(OTf) <sub>3</sub> | <b>L1</b>  | Et <sub>2</sub> O                    | 58 | 74 |
| 33 <sup>i</sup> | Yb(OTf) <sub>3</sub> | <b>L1</b>  | Et <sub>2</sub> O                    | 54 | 72 |
| 34 <sup>j</sup> | Yb(OTf) <sub>3</sub> | <b>L1</b>  | Et <sub>2</sub> O                    | 61 | 66 |
| 35 <sup>k</sup> | Yb(OTf) <sub>3</sub> | <b>L1</b>  | Et <sub>2</sub> O                    | 59 | 61 |

<sup>a</sup>Unless otherwise noted, the reactions were performed with metal salts (10 mol%), Ligand (10 mol%), **4a** (0.10 mmol) and **1a** (0.20 mmol) in Et<sub>2</sub>O (0.5 mL) at rt for 14 h. <sup>b</sup>The yield of isolated product for the **5aa**. <sup>c</sup>*ee* (**5aa**) determined by chiral HPLC analysis. <sup>d</sup>at 0 °C. <sup>e</sup>at -5 °C. <sup>f</sup>at -10 °C. <sup>g</sup>at -20 °C. <sup>h</sup> with Yb(OTf)<sub>3</sub> (20 mol%) and **L1** (10 mol%). <sup>i</sup> with Yb(OTf)<sub>3</sub> (15 mol%) and **L1** (10 mol%). <sup>j</sup> with Yb(OTf)<sub>3</sub> (10 mol%) and **L1** (15 mol%). <sup>k</sup> with Yb(OTf)<sub>3</sub> (10 mol%) and **L1** (20 mol%).

## 5. General procedure and spectral data of products 3

A dry reaction tube was charged with isocyanides **1** (0.2 mmol, 2 equiv.), Y(OTf)<sub>3</sub> (10 mol%) and alkylidene malonates **2** (0.1 mmol, 1 equiv.), Et<sub>2</sub>O (0.5 mL) was added. The reaction mixture continued stirring at rt for 14 h. The residue was directly purified by flash chromatography on silica gel using petroleum ether/ethyl acetate= 10/1 as eluent to afford the desired products **3**.

### Dimethyl (*E*)-3-(benzylamino)-4-(benzylimino)-2-phenylcyclobut-2-ene-1,1-dicarboxylate **3aa**

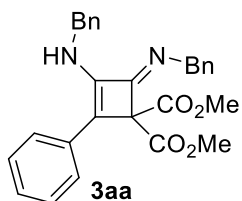

The reaction was run at rt for 14 h, affording product **3aa** in 88% yield (39.8 mg) as a white solid.  $R_f = 0.3$  (PE:EA = 4:1), m.p. 113–114 °C.

<sup>1</sup>H NMR (600 MHz, CDCl<sub>3</sub>)  $\delta$  7.39 – 7.35 (m, 3H), 7.35 – 7.31 (m, 5H), 7.31 – 7.30 (m, 2H), 7.29 – 7.25 (m, 3H), 7.24 – 7.18 (m, 2H), 4.88 (d,  $J = 6.3$  Hz,

2H), 4.80 (s, 2H), 4.60 (t,  $J = 6.4$  Hz, 1H), 3.70 (s, 6H).

<sup>13</sup>C NMR (151 MHz, CDCl<sub>3</sub>)  $\delta$  169.5, 150.8, 145.7, 139.7, 139.6, 132.5, 128.6, 128.6, 128.2, 127.6, 127.4, 127.4, 126.8, 126.5, 126.2, 118.8, 68.7, 55.7, 52.7, 48.8.

HRMS (ESI-TOF) calcd for C<sub>28</sub>H<sub>27</sub>N<sub>2</sub>O<sub>4</sub><sup>+</sup> ([M+H<sup>+</sup>]) = 455.1966, Found 455.1962.

### Diethyl (*E*)-3-(benzylamino)-4-(benzylimino)-2-phenylcyclobut-2-ene-1,1-dicarboxylate **3ab**

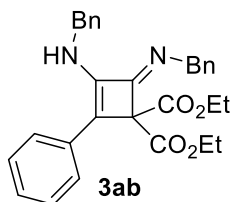

The reaction was run at rt for 14 h, affording product **3ab** in 80% yield (38.4 mg) as a yellow solid.  $R_f = 0.3$  (PE:EA = 4:1), m.p. 80–81 °C.

<sup>1</sup>H NMR (600 MHz, CDCl<sub>3</sub>)  $\delta$  7.40 – 7.35 (m, 2H), 7.35 – 7.33 (m, 3H), 7.33 – 7.30 (m, 3H), 7.30 – 7.26 (m, 5H), 7.24 – 7.16 (m, 2H), 4.88 (d,  $J = 6.4$  Hz, 2H),

4.82 (s, 2H), 4.60 (t,  $J = 6.4$  Hz, 1H), 4.18 (m, 4H), 1.15 (t,  $J = 7.1$  Hz, 6H).

<sup>13</sup>C NMR (151 MHz, CDCl<sub>3</sub>)  $\delta$  169.1, 151.1, 145.6, 139.8, 139.8, 132.6, 128.6, 128.4, 128.2, 127.6, 127.4, 127.4, 126.7, 126.5, 126.4, 119.1, 69.3, 61.7, 55.7, 48.7, 13.9.

HRMS (ESI-TOF) calcd for C<sub>30</sub>H<sub>31</sub>N<sub>2</sub>O<sub>4</sub><sup>+</sup> ([M+H<sup>+</sup>]) = 483.2279, Found 483.2278.

### Diisopropyl (*E*)-3-(benzylamino)-4-(benzylimino)-2-phenylcyclobut-2-ene-1,1-dicarboxylate **3ac**

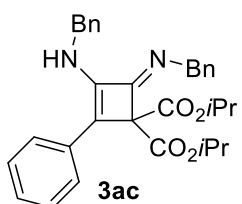

The reaction was run at rt for 14 h, affording product **3ac** in 73% yield (37.2 mg) as a white solid.  $R_f = 0.3$  (PE:EA = 4:1), m.p. 142–144 °C.

<sup>1</sup>H NMR (400 MHz, CDCl<sub>3</sub>)  $\delta$  7.40 – 7.34 (m, 4H), 7.34 – 7.29 (m, 4H), 7.29 – 7.26 (m, 5H), 7.26 – 7.13 (m, 2H), 5.14 – 5.01 (m, 2H), 4.86 (d,  $J = 6.4$  Hz, 2H),

4.81 (s, 2H), 4.59 (t,  $J = 6.4$  Hz, 1H), 1.15 (d,  $J = 6.3$  Hz, 12H).

$^{13}\text{C}$  NMR (101 MHz,  $\text{CDCl}_3$ )  $\delta$  168.6, 151.3, 145.6, 140.0, 139.9, 132.7, 128.6, 128.3, 128.2, 127.5, 127.4, 127.3, 126.7, 126.6, 126.4, 119.4, 69.8, 69.3, 55.8, 48.7, 21.5, 21.4.

HRMS (ESI-TOF) calcd for  $\text{C}_{32}\text{H}_{35}\text{N}_2\text{O}_4^+$  ( $[\text{M}+\text{H}^+]$ ) = 511.2592, Found 511.2590.

### Dibenzyl (*E*)-3-(benzylamino)-4-(benzylimino)-2-phenylcyclobut-2-ene-1,1-dicarboxylate **3ad**

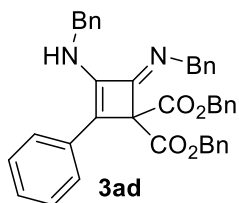

The reaction was run at rt for 14 h, affording product **3ad** in 71% yield (42.8 mg) as a white solid.  $R_f$  = 0.3 (PE:EA = 4:1), m.p. 130–132 °C.

$^1\text{H}$  NMR (600 MHz,  $\text{CDCl}_3$ )  $\delta$  7.36 – 7.30 (m, 3H), 7.30 – 7.26 (m, 6H), 7.26 – 7.22 (m, 6H), 7.22 – 7.16 (m, 4H), 7.14 (s, 3H), 7.13 (s, 3H), 5.14 (q,  $J$  = 12.4

Hz, 4H), 4.84 (d,  $J$  = 6.3 Hz, 2H), 4.64 (s, 2H), 4.60 (t,  $J$  = 6.4 Hz, 1H).

$^{13}\text{C}$  NMR (151 MHz,  $\text{CDCl}_3$ )  $\delta$  168.8, 150.5, 145.7, 139.7, 139.6, 135.2, 132.5, 128.6, 128.5, 128.4, 128.2, 128.1, 128.1, 127.5, 127.4, 127.3, 126.8, 126.4, 126.4, 118.7, 69.4, 67.4, 55.7, 48.7.

HRMS (ESI-TOF) calcd for  $\text{C}_{40}\text{H}_{35}\text{N}_2\text{O}_4^+$  ( $[\text{M}+\text{H}^+]$ ) = 607.2592, Found 607.2589.

### Dimethyl (*E*)-3-(benzylamino)-4-(benzylimino)-2-(2-fluorophenyl)cyclobut-2-ene-1,1-dicarboxylate **3ae**

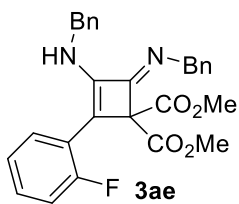

The reaction was run at rt for 14 h, affording product **3ae** in 70% yield (33.3 mg) as a white solid.  $R_f$  = 0.3 (PE:EA = 4:1), m.p. 110–112 °C.

$^1\text{H}$  NMR (600 MHz,  $\text{CDCl}_3$ )  $\delta$  7.34 (dt,  $J$  = 13.1, 7.4 Hz, 5H), 7.31 – 7.26 (m, 4H), 7.25 (s, 1H), 7.22 (t,  $J$  = 7.2 Hz, 1H), 7.17 – 7.13 (m, 1H), 7.09 (t,  $J$  = 7.2

Hz, 1H), 7.02 (dd,  $J$  = 12.6, 8.4 Hz, 1H), 5.10 (dt,  $J$  = 10.3, 6.5 Hz, 1H), 4.94 (d,  $J$  = 6.4 Hz, 2H), 4.79 (s, 2H), 3.69 (s, 6H).

$^{13}\text{C}$  NMR (151 MHz,  $\text{CDCl}_3$ )  $\delta$  169.5, 159.0 ( $J$  = 163.6 Hz), 150.8, 146.4, 139.9, 139.6, 128.6, 128.2, 128.1 ( $J$  = 5.1 Hz), 127.8 ( $J$  = 4.0 Hz), 127.4, 127.4, 127.2, 126.5, 124.5 ( $J$  = 2.0 Hz), 120.4 ( $J$  = 11.1 Hz), 115.5 ( $J$  = 16.2 Hz), 111.7, 68.2, 55.7, 52.7, 48.3.

$^{19}\text{F}$  NMR (376 MHz,  $\text{CDCl}_3$ )  $\delta$  -110.75.

HRMS (ESI-TOF) calcd for  $\text{C}_{28}\text{H}_{26}\text{FN}_2\text{O}_4^+$  ( $[\text{M}+\text{H}^+]$ ) = 473.1872, Found 473.1871.

### Dimethyl (*E*)-3-(benzylamino)-4-(benzylimino)-2-(2-chlorophenyl)cyclobut-2-ene-1,1-dicarboxylate **3af**

The reaction was run at rt for 14 h, affording product **3af** in 62% yield (30.1 mg) as a white solid.  $R_f$  = 0.3 (PE:EA = 4:1), m.p. 100–102 °C.

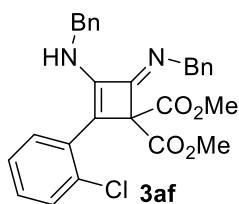

$^1\text{H NMR}$  (400 MHz,  $\text{CDCl}_3$ )  $\delta$  7.39 – 7.34 (m, 1H), 7.34 – 7.30 (m, 4H), 7.30 – 7.26 (m, 3H), 7.25 – 7.22 (m, 4H), 7.21 – 7.17 (m, 2H), 4.79 (s, 2H), 4.74 (t,  $J$  = 6.2 Hz, 1H), 4.53 (d,  $J$  = 6.2 Hz, 2H), 3.70 (s, 6H).

$^{13}\text{C NMR}$  (101 MHz,  $\text{CDCl}_3$ )  $\delta$  169.5, 150.8, 147.3, 139.5, 139.0, 132.9, 131.9, 130.0, 129.7, 128.8, 128.5, 128.3, 127.6, 127.5, 127.3, 126.7, 126.5, 114.7, 70.3, 55.7, 52.7, 47.9.

HRMS (ESI-TOF) calcd for  $\text{C}_{28}\text{H}_{26}\text{ClN}_2\text{O}_4^+$  ( $[\text{M}+\text{H}^+]$ ) = 489.1576, Found 489.1574.

### Dimethyl (*E*)-3-(benzylamino)-4-(benzylimino)-2-(2-methoxyphenyl)cyclobut-2-ene-1,1-dicarboxylate **3ag**

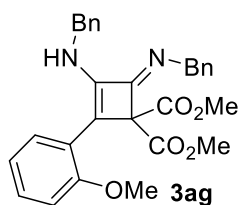

The reaction was run at rt for 14 h, affording product **3ag** in 66% yield (33.8 mg) as a white solid.  $R_f$  = 0.3 (PE:EA = 4:1), m.p. 95–96 °C.

$^1\text{H NMR}$  (600 MHz,  $\text{CDCl}_3$ )  $\delta$  7.39 (d,  $J$  = 7.3 Hz, 2H), 7.36 – 7.32 (m, 2H), 7.31 – 7.26 (m, 5H), 7.23 – 7.19 (m, 2H), 7.19 – 7.14 (m, 1H), 6.93 (t,  $J$  = 7.6 Hz,

1H), 6.85 (d,  $J$  = 8.3 Hz, 1H), 5.44 (t,  $J$  = 6.4 Hz, 1H), 4.93 (d,  $J$  = 6.4 Hz, 2H), 4.78 (s, 2H), 3.75 (s, 3H), 3.67 (s, 6H).

$^{13}\text{C NMR}$  (151 MHz,  $\text{CDCl}_3$ )  $\delta$  169.9, 155.6, 151.2, 146.0, 140.6, 139.9, 128.5, 128.1, 128.1, 127.8, 127.3, 127.1, 126.4, 122.3, 121.3, 115.2, 111.3, 68.2, 55.6, 55.6, 52.6, 48.3.

HRMS (ESI-TOF) calcd for  $\text{C}_{29}\text{H}_{29}\text{N}_2\text{O}_5^+$  ( $[\text{M}+\text{H}^+]$ ) = 485.2071, Found 485.2068.

### Dimethyl (*E*)-3-(benzylamino)-4-(benzylimino)-2-(3-fluorophenyl)cyclobut-2-ene-1,1-dicarboxylate **3ah**

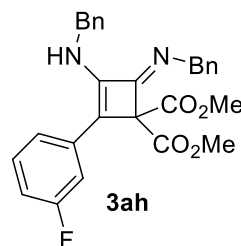

The reaction was run at rt for 14 h, affording product **3ah** in 80% yield (37.9 mg) as a white solid.  $R_f$  = 0.3 (PE:EA = 4:1), m.p. 130–131 °C.

$^1\text{H NMR}$  (400 MHz,  $\text{CDCl}_3$ )  $\delta$  7.38 – 7.31 (m, 5H), 7.30 – 7.26 (m, 4H), 7.25 – 7.21 (m, 1H), 7.08 (d,  $J$  = 7.91 Hz, 1H), 7.05 – 7.00 (m, 1H), 6.89 (td,  $J$  = 8.4, 2.5 Hz, 1H), 4.88 (d,  $J$  = 6.2 Hz, 2H), 4.82 (s, 2H), 4.68 (t,  $J$  = 6.1 Hz, 1H), 3.72

(s, 6H).

$^{13}\text{C NMR}$  (101 MHz,  $\text{CDCl}_3$ )  $\delta$  169.3, 162.8 ( $J$  = 246.6 Hz), 150.6, 146.3, 139.5, 139.3, 134.6 ( $J$  = 8.2 Hz), 130.1 ( $J$  = 8.7 Hz), 128.6, 128.2, 127.6, 127.5, 127.4, 126.6, 121.9 ( $J$  = 2.8 Hz), 117.1 ( $J$  = 2.9 Hz), 113.6 ( $J$  = 21.5 Hz), 112.7 ( $J$  = 22.7 Hz), 68.9, 55.7, 52.7, 48.8.

$^{19}\text{F NMR}$  (376 MHz,  $\text{CDCl}_3$ )  $\delta$  -112.38.

HRMS (ESI-TOF) calcd for  $C_{28}H_{26}FN_2O_4^+$  ( $[M+H]^+$ ) = 473.1832, Found 473.1872.

**Dimethyl (*E*)-3-(benzylamino)-4-(benzylimino)-2-(3-bromophenyl)cyclobut-2-ene-1,1-dicarboxylate **3ai****

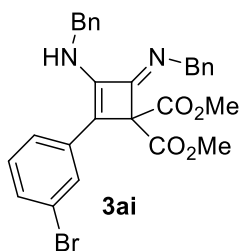

The reaction was run at rt for 14 h, affording product **3ai** in 71% yield (37.8 mg) as a white solid.  $R_f = 0.3$  (PE:EA = 4:1), m.p. 127–128 °C.

$^1H$  NMR (400 MHz,  $CDCl_3$ )  $\delta$  7.42 (t,  $J = 1.7$  Hz, 1H), 7.40 – 7.33 (m, 3H), 7.33 – 7.28 (m, 4H), 7.28 – 7.26 (m, 2H), 7.25 – 7.22 (m, 1H), 7.22 – 7.16 (m, 2H), 4.87 (d,  $J = 6.3$  Hz, 2H), 4.80 (s, 2H), 4.66 (t,  $J = 6.4$  Hz, 1H), 3.71 (s, 6H).

$^{13}C$  NMR (101 MHz,  $CDCl_3$ )  $\delta$  169.3, 150.5, 146.4, 139.5, 139.3, 134.6, 130.1, 129.5, 128.8, 128.7, 128.2, 127.6, 127.5, 127.4, 126.6, 124.7, 122.7, 116.6, 68.9, 55.7, 52.8, 48.8.

HRMS (ESI-TOF) calcd for  $C_{28}H_{26}BrN_2O_4^+$  ( $[M+H]^+$ ) = 533.1071, Found 533.1072.

**Dimethyl (*E*)-3-(benzylamino)-4-(benzylimino)-2-(4-chlorophenyl)cyclobut-2-ene-1,1-dicarboxylate **3aj****

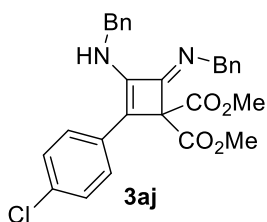

The reaction was run at rt for 14 h, affording product **3aj** in 65% yield (31.8 mg) as a white solid.  $R_f = 0.3$  (PE:EA = 4:1), m.p. 150–151 °C.

$^1H$  NMR (400 MHz,  $CDCl_3$ )  $\delta$  7.40 – 7.33 (m, 4H), 7.33 – 7.29 (m, 3H), 7.29 – 7.26 (m, 4H), 7.25 (s, 2H), 7.22 (s, 1H), 4.86 (d,  $J = 6.3$  Hz, 2H), 4.79 (s, 2H),

4.57 (t,  $J = 5.2, 6.2$  Hz, 1H), 3.70 (s, 6H).

$^{13}C$  NMR (101 MHz,  $CDCl_3$ )  $\delta$  169.4, 150.5, 145.9, 139.6, 139.4, 132.3, 131.0, 128.8, 128.7, 128.2, 127.6, 127.5, 127.4, 127.4, 126.6, 117.5, 68.9, 55.7, 52.7, 48.8.

HRMS (ESI-TOF) calcd for  $C_{28}H_{26}ClN_2O_4^+$  ( $[M+H]^+$ ) = 489.1576, Found 489.1578.

**Dimethyl (*E*)-3-(benzylamino)-4-(benzylimino)-2-(4-bromophenyl)cyclobut-2-ene-1,1-dicarboxylate **3ak****

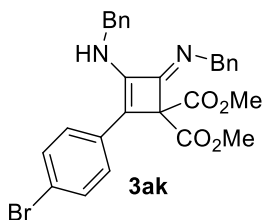

The reaction was run at rt for 14 h, affording product **3ak** in 71% yield (37.9 mg) as a white solid.  $R_f = 0.3$  (PE:EA = 4:1), m.p. 150–151 °C.

$^1H$  NMR (400 MHz,  $CDCl_3$ )  $\delta$  7.43 (dt,  $J = 8.8, 2.4$  Hz, 2H), 7.38 – 7.33 (m, 4H), 7.33 – 7.26 (m, 5H), 7.25 – 7.19 (m, 1H), 7.17 (dt,  $J = 8.6, 2.4$  Hz, 2H),

4.86 (d,  $J = 6.3$  Hz, 2H), 4.79 (s, 2H), 4.57 (t,  $J = 6.3$  Hz, 1H), 3.70 (s, 6H).

$^{13}C$  NMR (101 MHz,  $CDCl_3$ )  $\delta$  169.3, 150.5, 146.0, 139.5, 139.3, 131.7, 131.4, 128.7, 128.2, 127.6, 127.5, 127.4, 126.6, 120.5, 117.4, 68.8, 55.7, 52.8, 48.8.

HRMS (ESI-TOF) calcd for  $C_{28}H_{26}BrN_2O_4^+$  ( $[M+H]^+$ ) = 533.1071, Found 533.1066.

### Dimethyl (*E*)-3-(benzylamino)-4-(benzylimino)-2-(*p*-tolyl)cyclobut-2-ene-1,1-dicarboxylate

#### 3al

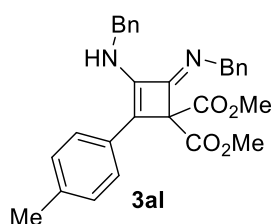

The reaction was run at rt for 14 h, affording product **3al** in 72% yield (33.6 mg) as a white solid.  $R_f$  = 0.3 (PE:EA = 4:1), m.p. 144–145 °C.

$^1H$  NMR (400 MHz,  $CDCl_3$ )  $\delta$  7.43 – 7.34 (m, 3H), 7.34 – 7.29 (m, 3H), 7.29 – 7.26 (m, 3H), 7.26 – 7.18 (m, 3H), 7.14 (d,  $J$  = 7.8 Hz, 2H), 4.86 (d,  $J$  = 6.3 Hz, 2H), 4.78 (s, 2H), 4.51 (t,  $J$  = 6.4 Hz, 1H), 3.69 (s, 6H), 2.33 (s, 3H).

$^{13}C$  NMR (101 MHz,  $CDCl_3$ )  $\delta$  169.6, 150.9, 145.1, 139.8, 139.8, 136.9, 129.7, 129.4, 128.6, 128.2, 127.6, 127.4, 127.4, 126.5, 126.2, 119.3, 68.7, 55.6, 52.6, 48.8, 21.3.

HRMS (ESI-TOF) calcd for  $C_{28}H_{26}BrN_2O_4^+$  ( $[M+H]^+$ ) = 469.2122, Found 469.2118.

### Dimethyl (*E*)-3-(benzylamino)-4-(benzylimino)-2-(4-isopropylphenyl)cyclobut-2-ene-1,1-dicarboxylate **3am**

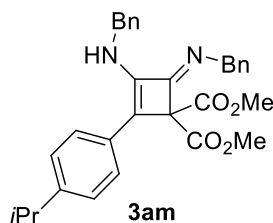

The reaction was run at rt for 14 h, affording product **3am** in 70% yield (34.6 mg) as a white solid.  $R_f$  = 0.3 (PE:EA = 4:1), m.p. 136–138 °C.

$^1H$  NMR (400 MHz,  $CDCl_3$ )  $\delta$  7.44-7.35 (m, 3H), 7.35 – 7.30 (m, 3H), 7.30-7.26 (m, 4H), 7.26 – 7.16 (m, 4H), 4.88 (d,  $J$  = 6.3 Hz, 2H), 4.80 (s, 2H), 4.57 (t,  $J$  = 6.4 Hz, 1H), 3.70 (s, 6H), 2.99 – 2.80 (m, 1H), 1.25 (d,  $J$  = 6.9 Hz, 6H).

$^{13}C$  NMR (101 MHz,  $CDCl_3$ )  $\delta$  169.6, 150.9, 147.8, 145.1, 139.8, 130.0, 128.6, 128.2, 128.2, 127.6, 127.4, 127.4, 126.7, 126.5, 126.2, 119.3, 68.7, 55.6, 52.6, 48.8, 33.9, 23.8.

HRMS (ESI-TOF) calcd for  $C_{29}H_{26}N_3O_4^+$  ( $[M+H]^+$ ) = 497.2435, Found 497.2427.

### Dimethyl (*E*)-3-(benzylamino)-4-(benzylimino)-2-(4-cyanophenyl)cyclobut-2-ene-1,1-dicarboxylate **3an**

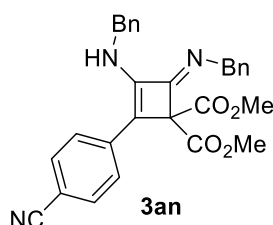

The reaction was run at rt for 14 h, affording product **3an** in 80% yield (38.3 mg) as a yellow solid.  $R_f$  = 0.3 (PE:EA = 4:1), m.p. 157–159 °C.

$^1H$  NMR (600 MHz,  $CDCl_3$ )  $\delta$  7.57 (d,  $J$  = 8.3 Hz, 2H), 7.35 (t,  $J$  = 4.3 Hz, 5H), 7.34 – 7.29 (m, 4H), 7.27 (s, 2H), 7.24 (t,  $J$  = 7.2 Hz, 1H), 4.92 (d,  $J$  = 6.2 Hz, 2H), 4.82 (s, 3H), 3.71 (s, 6H).

$^{13}C$  NMR (151 MHz,  $CDCl_3$ )  $\delta$  169.0, 150.3, 147.7, 139.2, 138.8, 137.0, 132.3, 128.8, 128.3, 127.7, 127.6, 127.4, 126.7, 126.1, 119.0, 115.6, 109.0, 68.8, 55.9, 52.9, 48.9.

HRMS (ESI-TOF) calcd for  $C_{29}H_{26}N_3O_4^+$  ( $[M+H]^+$ ) = 480.1918, Found 480.1917.

**Dimethyl (*E*)-3-(benzylamino)-4-(benzylimino)-2-(4-nitrophenyl)cyclobut-2-ene-1,1-dicarboxylate **3ao****

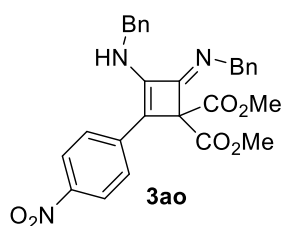

The reaction was run at rt for 14 h, affording product **3ao** in 86% yield (43.1 mg) as a yellow solid.  $R_f$  = 0.3 (PE:EA = 4:1), m.p. 140–142 °C.

$^1H$  NMR (400 MHz,  $CDCl_3$ )  $\delta$  8.19 – 8.13 (m, 2H), 7.42 – 7.34 (m, 6H), 7.34 – 7.26 (m, 5H), 7.26 – 7.20 (m, 1H), 4.99 – 4.90 (m, 3H), 4.84 (s, 2H),

3.72 (s, 6H).

$^{13}C$  NMR (101 MHz,  $CDCl_3$ )  $\delta$  168.9, 150.3, 148.2, 145.1, 139.1, 139.0, 138.7, 128.8, 128.3, 127.8, 127.7, 127.4, 126.8, 126.0, 124.1, 115.2, 68.9, 56.0, 52.9, 49.0.

HRMS (ESI-TOF) calcd for  $C_{28}H_{26}N_3O_6^+$  ( $[M+H]^+$ ) = 500.1817, Found 500.1812.

**Dimethyl (*E*)-3-(benzylamino)-4-(benzylimino)-2-(3,4,5-trimethoxyphenyl)cyclobut-2-ene-1,1-dicarboxylate **3ap****

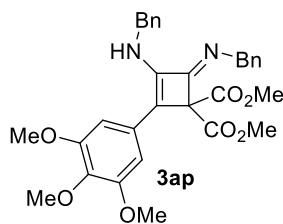

The reaction was run at rt for 14 h, affording product **3ap** in 86% yield (45.2 mg) as a yellow solid.  $R_f$  = 0.3 (PE:EA = 4:1), m.p. 100–101 °C.

$^1H$  NMR (600 MHz,  $CDCl_3$ )  $\delta$  7.38 – 7.30 (m, 5H), 7.30 – 7.26 (m, 4H), 7.25 – 7.20 (m, 1H), 6.61 (s, 2H), 4.83 (d,  $J$  = 6.5 Hz, 2H), 4.78 (s, 2H), 4.63 (t,  $J$

= 6.6 Hz, 1H), 3.85 (s, 3H), 3.77 (s, 6H), 3.71 (s, 6H).

$^{13}C$  NMR (151 MHz,  $CDCl_3$ )  $\delta$  169.4, 153.2, 150.5, 145.3, 139.5, 139.5, 137.5, 128.5, 128.1, 128.0, 127.3, 127.3, 127.1, 126.5, 119.3, 104.1, 69.0, 60.8, 56.0, 55.5, 52.6, 48.5.

HRMS (ESI-TOF) calcd for  $C_{31}H_{33}N_2O_7^+$  ( $[M+H]^+$ ) = 545.2283, Found 545.2282.

**Dimethyl (*E*)-3-(benzylamino)-4-(benzylimino)-2-(naphthalen-2-yl)cyclobut-2-ene-1,1-dicarboxylate **3aq****

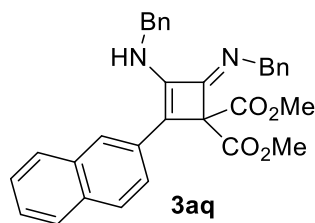

The reaction was run at rt for 14 h, affording product **3aq** in 90% yield (45.6 mg) as a yellow solid.  $R_f$  = 0.3 (PE:EA = 4:1), m.p. 88–90 °C.

$^1H$  NMR (600 MHz,  $CDCl_3$ )  $\delta$  7.82 – 7.77 (m, 4H), 7.52 – 7.44 (m, 3H), 7.44 – 7.41 (m, 2H), 7.40 – 7.35 (m, 2H), 7.35 – 7.30 (m, 5H), 7.28 – 7.24

(m, 1H), 4.95 (d,  $J$  = 6.0 Hz, 2H), 4.87 (s, 2H), 4.83 (t,  $J$  = 6.0 Hz, 1H), 3.73 (s, 6H).

$^{13}C$  NMR (151 MHz,  $CDCl_3$ )  $\delta$  169.6, 150.8, 145.9, 139.6, 139.6, 133.4, 132.0, 130.0, 128.6, 128.2, 128.2, 128.0, 127.6, 127.6, 127.4, 126.5, 126.4, 126.0, 125.1, 124.1, 118.8, 68.8, 55.7, 52.7, 48.8.



HRMS (ESI-TOF) calcd for  $C_{32}H_{29}N_2O_4^+$  ( $[M+H]^+$ ) = 505.2122, Found 505.2121.

**Dimethyl (*E*)-3-(benzylamino)-4-(benzylimino)-2-(furan-2-yl)cyclobut-2-ene-1,1-dicarboxylate **3ar****

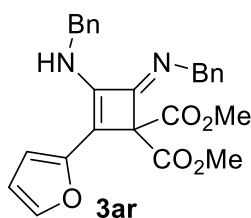

The reaction was run at rt for 14 h, affording product **3ar** in 60% yield (26.6 mg) as a green solid.  $R_f = 0.3$  (PE:EA = 4:1), m.p. 116–118 °C.

$^1H$  NMR (600 MHz,  $CDCl_3$ )  $\delta$  7.40 (s, 1H), 7.36 (d,  $J = 7.7$  Hz, 2H), 7.32 (d,  $J = 7.4$  Hz, 2H), 7.29 (s, 1H), 7.26 (d,  $J = 6.9$  Hz, 4H), 7.20 (t,  $J = 7.1$  Hz, 1H),

6.41 (d,  $J = 1.7$  Hz, 1H), 6.33 (d,  $J = 3.4$  Hz, 1H), 4.92 (t,  $J = 6.5$  Hz, 1H), 4.83 (d,  $J = 6.4$  Hz, 2H), 4.78 (s, 2H), 3.70 (s, 6H).

$^{13}C$  NMR (151 MHz,  $CDCl_3$ )  $\delta$  168.9, 150.2, 148.4, 143.3, 142.5, 139.7, 139.5, 128.6, 128.2, 127.7, 127.5, 127.4, 126.6, 111.8, 108.5, 107.8, 67.8, 55.7, 52.7, 48.6.

HRMS (ESI-TOF) calcd for  $C_{26}H_{25}N_2O_5^+$  ( $[M+H]^+$ ) = 445.1758, Found 445.1757.

**Dimethyl (*E*)-3-(benzylamino)-4-(benzylimino)-2-(thiophen-2-yl)cyclobut-2-ene-1,1-dicarboxylate **3as****

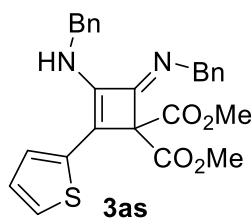

The reaction was run at rt for 14 h, affording product **3as** in 60% yield (27.6 mg) as a red solid.  $R_f = 0.3$  (PE:EA = 4:1), m.p. 107–109 °C.

$^1H$  NMR (600 MHz,  $CDCl_3$ )  $\delta$  7.38 – 7.31 (m, 4H), 7.31 – 7.26 (m, 6H), 7.24 – 7.20 (m, 1H), 7.07 (dd,  $J = 3.6, 1.2$  Hz, 1H), 7.03 (dd,  $J = 4.8, 3.6$  Hz, 1H),

4.89 (d,  $J = 6.4$  Hz, 2H), 4.80 (s, 2H), 4.44 (t,  $J = 6.4$  Hz, 1H), 3.71 (s, 6H).

$^{13}C$  NMR (151 MHz,  $CDCl_3$ )  $\delta$  169.0, 150.3, 143.7, 139.7, 139.5, 134.6, 128.6, 128.2, 127.7, 127.5, 127.4, 127.4, 126.5, 124.9, 124.6, 113.5, 69.2, 55.7, 52.7, 48.7.

HRMS (ESI-TOF) calcd for  $C_{26}H_{25}N_2O_4S^+$  ( $[M+H]^+$ ) = 461.1530, Found 461.1527.

**Dimethyl (*E*)-2-(benzo[*b*]thiophen-2-yl)-3-(benzylamino)-4-(benzylimino)cyclobut-2-ene-1,1-dicarboxylate **3at****

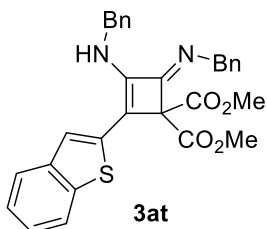

The reaction was run at rt for 14 h, affording product **3at** in 68% yield (34.1 mg) as a yellow solid.  $R_f = 0.3$  (PE:EA = 4:1), m.p. 144–145 °C.

$^1H$  NMR (400 MHz,  $CDCl_3$ )  $\delta$  7.74 (t,  $J = 8.8$  Hz, 2H), 7.43 – 7.33 (m, 5H), 7.33 – 7.27 (m, 6H), 7.26 – 7.18 (m, 2H), 4.95 (d,  $J = 6.3$  Hz, 2H), 4.83 (s,

2H), 4.66 (t,  $J = 6.3$  Hz, 1H), 3.74 (s, 6H).

$^{13}\text{C}$  NMR (101 MHz,  $\text{CDCl}_3$ )  $\delta$  168.9, 150.3, 145.4, 139.9, 139.6, 139.3, 139.2, 134.1, 128.7, 128.2, 127.6, 127.5, 127.4, 126.6, 124.8, 124.3, 123.7, 121.9, 120.7, 113.0, 69.2, 55.9, 52.8, 48.8.

HRMS (ESI-TOF) calcd for  $\text{C}_{30}\text{H}_{27}\text{N}_2\text{O}_4\text{S}^+$  ( $[\text{M}+\text{H}^+]$ ) = 511.1687, Found 511.1684.

**Dimethyl (*E*)-3-(benzylamino)-4-(benzylimino)-2-((*E*)-styryl)cyclobut-2-ene-1,1-dicarboxylate**

**3au**

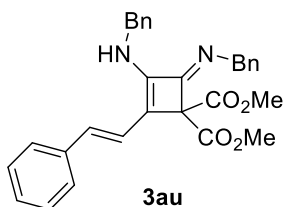

The reaction was run at  $35^\circ\text{C}$  for 14 h, affording product **3au** in 62% yield (29.9 mg) as a yellow solid.  $R_f = 0.3$  (PE:EA = 4:1), m.p.  $120\text{--}122^\circ\text{C}$ .

$^1\text{H}$  NMR (400 MHz,  $\text{CDCl}_3$ )  $\delta$  7.42 – 7.37 (m, 4H), 7.33 (s, 1H), 7.31 (m, 3H), 7.30 – 7.26 (m, 5H), 7.25 – 7.17 (m, 2H), 6.73 (dd, 77.2, 15.6 Hz, 2H),

4.91 (t,  $J = 6.0$  Hz, 1H), 4.76 (s, 2H), 4.62 (d,  $J = 6.0$  Hz, 2H), 3.76 (s, 6H).

$^{13}\text{C}$  NMR (101 MHz,  $\text{CDCl}_3$ )  $\delta$  169.1, 150.6, 145.3, 139.4, 138.1, 137.4, 130.1, 128.8, 128.5, 128.3, 127.7, 127.7, 127.5, 127.4, 126.7, 126.4, 119.2, 117.9, 68.8, 55.7, 52.7, 48.5.

HRMS (ESI-TOF) calcd for  $\text{C}_{30}\text{H}_{29}\text{N}_2\text{O}_4^+$  ( $[\text{M}+\text{H}^+]$ ) = 481.2122, Found 481.2122.

**Dimethyl (*E*)-3-(benzylamino)-4-(benzylimino)-2-cyclohexylcyclobut-2-ene-1,1-dicarboxylate**

**3av**

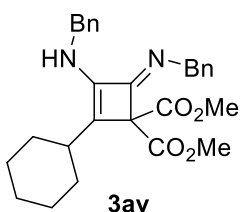

The reaction was run at rt for 14 h, affording product **3av** in 68% yield (31.3 mg) as a white solid.  $R_f = 0.3$  (PE:EA = 4:1), m.p.  $90\text{--}92^\circ\text{C}$ .

$^1\text{H}$  NMR (600 MHz,  $\text{CDCl}_3$ )  $\delta$  7.36 – 7.31 (m, 5H), 7.28 (t,  $J = 7.4$  Hz, 3H), 7.24 (d,  $J = 7.0$  Hz, 2H), 7.20 (t,  $J = 7.4$  Hz, 1H), 4.63 (s, 2H), 4.57 (d,  $J = 5.2$

Hz, 2H), 4.17 (s, 1H), 3.70 (s, 6H), 2.46 (t,  $J = 11.9$  Hz, 1H), 1.75 (s, 1H), 1.69 (s, 1H), 1.63 (d,  $J = 10.8$  Hz, 1H), 1.39 – 1.29 (m, 3H), 1.24 – 1.08 (m, 4H).

$^{13}\text{C}$  NMR (101 MHz,  $\text{CDCl}_3$ )  $\delta$  170.2, 151.3, 146.1, 139.8, 139.7, 128.5, 128.2, 127.6, 127.5, 127.4, 127.3, 126.5, 68.5, 55.3, 52.4, 48.5, 38.1, 30.8, 26.2, 25.8.

HRMS (ESI-TOF) calcd for  $\text{C}_{28}\text{H}_{33}\text{N}_2\text{O}_4^+$  ( $[\text{M}+\text{H}^+]$ ) = 461.2435, Found 461.2434.

**Dimethyl (*E*)-3-((2-fluorobenzyl)amino)-4-((2-fluorobenzyl)imino)-2-phenylcyclobut-2-ene-1,1-dicarboxylate **3ba****

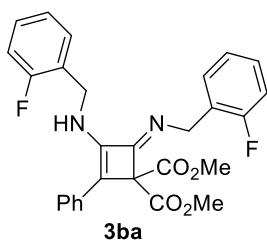

The reaction was run at rt for 14 h, affording product **3ba** in 72% yield (35.3 mg) as a white solid.  $R_f = 0.3$  (PE:EA = 4:1), m.p.  $116\text{--}117^\circ\text{C}$ .

$^1\text{H}$  NMR (600 MHz,  $\text{CDCl}_3$ )  $\delta$  7.40 (td,  $J = 7.6, 1.8$  Hz, 1H), 7.37 – 7.27 (m, 5H), 7.26 – 7.17 (m, 3H), 7.11 – 7.01 (m, 4H), 4.91 (d,  $J = 6.6$  Hz, 2H), 4.82 (s, 2H), 4.68 (t,  $J = 6.6$  Hz, 1H), 3.70 (s, 6H).  
 $^{13}\text{C}$  NMR (151 MHz,  $\text{CDCl}_3$ )  $\delta$  169.3, 161.0 ( $J = 246.1$  Hz), 150.4 ( $J = 244.6$  Hz), 151.4, 145.4, 132.4, 130.0 ( $J = 4.5$  Hz), 129.5 ( $J = 4.5$  Hz), 129.1 ( $J = 7.6$  Hz), 128.6, 128.2 ( $J = 7.6$  Hz), 127.0, 126.8 ( $J = 7.6$  Hz), 126.7 ( $J = 7.6$  Hz), 126.2, 124.2 ( $J = 3.0$  Hz), 123.9 ( $J = 3.0$  Hz), 119.5, 115.2 ( $J = 60.4$  Hz), 115.0 ( $J = 60.4$  Hz), 68.7, 52.7, 49.1, 42.6.

$^{19}\text{F}$  NMR (376 MHz,  $\text{CDCl}_3$ )  $\delta$  -118.95, -119.16.

HRMS (ESI-TOF) calcd for  $\text{C}_{28}\text{H}_{25}\text{F}_2\text{N}_2\text{O}_4^+$  ( $[\text{M}+\text{H}^+]$ ) = 491.1777, Found 491.1776.

**Dimethyl (*E*)-3-((2-bromobenzyl)amino)-4-((2-bromobenzyl)imino)-2-phenylcyclobut-2-ene-1,1-dicarboxylate **3ca****

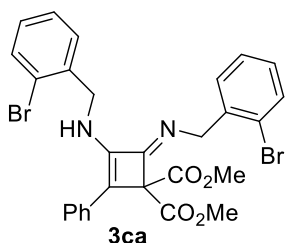

The reaction was run at rt for 14 h, affording product **3ca** in 79% yield (48.4 mg) as a white solid.  $R_f = 0.3$  (PE:EA = 4:1), m.p. 125–127 °C.

$^1\text{H}$  NMR (400 MHz,  $\text{CDCl}_3$ )  $\delta$  7.58 – 7.53 (m, 2H), 7.50 (dd,  $J = 7.6, 1.7$  Hz, 1H), 7.37 – 7.30 (m, 5H), 7.29 – 7.27 (m, 1H), 7.25 – 7.23 (m, 1H), 7.23 – 7.19 (m, 1H), 7.16 (dd,  $J = 7.7, 1.8$  Hz, 1H), 7.13 – 7.09 (m, 1H), 4.97 (s, 3H), 4.83 (s, 2H), 3.67 (s, 6H).

$^{13}\text{C}$  NMR (101 MHz,  $\text{CDCl}_3$ )  $\delta$  169.2, 151.5, 145.2, 139.0, 138.8, 132.7, 132.3, 132.2, 130.0, 129.0, 129.0, 128.7, 128.0, 127.6, 127.2, 127.0, 126.2, 123.5, 123.0, 119.6, 68.7, 55.4, 52.7, 48.6.

HRMS (ESI-TOF) calcd for  $\text{C}_{28}\text{H}_{25}\text{Br}_2\text{N}_2\text{O}_4^+$  ( $[\text{M}+\text{H}^+]$ ) = 613.0156, Found 613.0156.

**Dimethyl (*E*)-3-((2-methylbenzyl)amino)-4-((2-methylbenzyl)imino)-2-phenylcyclobut-2-ene-1,1-dicarboxylate **3da****

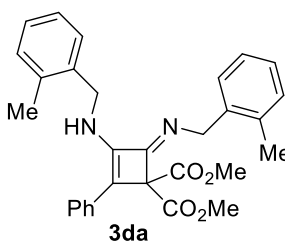

The reaction was run at rt for 14 h, affording product **3da** in 74% yield (35.5 mg) as a white solid.  $R_f = 0.3$  (PE:EA = 4:1), m.p. 142–143 °C.

$^1\text{H}$  NMR (600 MHz,  $\text{CDCl}_3$ )  $\delta$  7.37 – 7.32 (m, 3H), 7.32 – 7.29 (m, 2H), 7.24 – 7.20 (m, 2H), 7.20 – 7.17 (m, 3H), 7.17 – 7.11 (m, 4H), 4.89 (d,  $J = 6.1$  Hz, 2H), 4.75 (s, 2H), 4.46 (t,  $J = 6.1$  Hz, 1H), 3.68 (s, 6H), 2.36 (s, 3H), 2.35 (s, 3H).

$^{13}\text{C}$  NMR (151 MHz,  $\text{CDCl}_3$ )  $\delta$  169.6, 150.6, 145.8, 137.8, 137.2, 136.4, 135.8, 132.6, 130.5, 129.8, 128.6, 128.0, 127.6, 127.4, 126.7, 126.6, 126.1, 125.8, 118.4, 68.8, 53.6, 52.6, 47.0, 19.1, 19.0.

HRMS (ESI-TOF) calcd for  $\text{C}_{30}\text{H}_{31}\text{N}_2\text{O}_4^+$  ( $[\text{M}+\text{H}^+]$ ) = 483.2279, Found 483.2279.

**Dimethyl (*E*)-3-((2-methoxybenzyl)amino)-4-((2-methoxybenzyl)imino)-2-phenylcyclobut-2-ene-1,1-dicarboxylate **3ea****

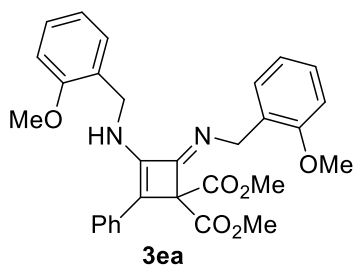

The reaction was run at rt for 14 h, affording product **3ea** in 82% yield (42.0mg) as a white solid.  $R_f = 0.3$  (PE:EA = 4:1), m.p. 91–93 °C.

$^1\text{H NMR}$  (400 MHz,  $\text{CDCl}_3$ )  $\delta$  7.38 – 7.29 (m, 5H), 7.29 – 7.21 (m, 3H), 7.21 – 7.14 (m, 1H), 6.96 – 6.84 (m, 4H), 4.97 (t,  $J = 6.5$  Hz, 1H), 4.86 (d,  $J = 6.5$  Hz, 2H), 4.80 (s, 2H), 3.86 (d,  $J = 5.6$  Hz, 6H), 3.64 (s,

6H).

$^{13}\text{C NMR}$  (101 MHz,  $\text{CDCl}_3$ )  $\delta$  169.6, 157.5, 156.7, 151.1, 146.2, 132.8, 129.6, 128.6, 128.5, 128.3, 128.2, 127.9, 127.4, 126.4, 126.0, 120.5, 120.3, 118.3, 110.2, 109.9, 68.7, 55.3, 55.2, 52.5, 50.2, 44.6.

HRMS (ESI–TOF) calcd for  $\text{C}_{30}\text{H}_{31}\text{N}_2\text{O}_6^+$  ( $[\text{M}+\text{H}^+]$ ) = 515.2177, Found 515.2175.

**Dimethyl (*E*)-3-((3-chlorobenzyl)amino)-4-((3-chlorobenzyl)imino)-2-phenylcyclobut-2-ene-1,1-dicarboxylate **3fa****

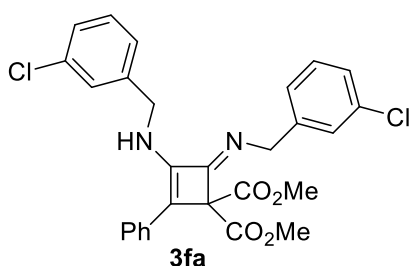

The reaction was run at rt for 14 h, affording product **3fa** in 74% yield (38.8 mg) as a white solid.  $R_f = 0.3$  (PE:EA = 4:1), m.p. 55–57 °C.

$^1\text{H NMR}$  (600 MHz,  $\text{CDCl}_3$ )  $\delta$  7.40 – 7.27 (m, 6H), 7.25 (s, 2H), 7.24 – 7.16 (m, 4H), 7.12 (d,  $J = 7.3$  Hz, 1H), 4.85 (d,  $J = 6.5$  Hz,

2H), 4.75 (s, 2H), 4.67 (t,  $J = 6.6$  Hz, 1H), 3.71 (s, 6H).

$^{13}\text{C NMR}$  (151 MHz,  $\text{CDCl}_3$ )  $\delta$  169.3, 151.3, 145.2, 141.8, 141.6, 134.5, 134.1, 132.2, 129.9, 129.5, 128.7, 127.5, 127.5, 127.1, 126.7, 126.2, 125.5, 119.6, 68.6, 55.1, 52.8, 48.0.

HRMS (ESI–TOF) calcd for  $\text{C}_{28}\text{H}_{25}\text{Cl}_2\text{N}_2\text{O}_4^+$  ( $[\text{M}+\text{H}^+]$ ) = 523.1186, Found 523.1185.

**Dimethyl (*E*)-3-((3-bromobenzyl)amino)-4-((3-bromobenzyl)imino)-2-phenylcyclobut-2-ene-1,1-dicarboxylate **3ga****

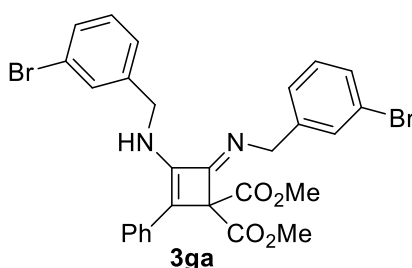

The reaction was run at rt for 14 h, affording product **3ga** in 82% yield (50.0 mg) as a white solid.  $R_f = 0.3$  (PE:EA = 4:1), m.p. 86–88 °C.

$^1\text{H NMR}$  (600 MHz,  $\text{CDCl}_3$ )  $\delta$  7.50 (s, 1H), 7.40 (d,  $J = 7.2$  Hz, 2H), 7.38 – 7.33 (m, 3H), 7.31 (d,  $J = 6.9$  Hz, 2H), 7.27 (d,  $J = 8.0$

Hz, 1H), 7.24 – 7.19 (m, 2H), 7.19 – 7.14 (m, 2H), 4.84 (d,  $J = 6.5$  Hz, 2H), 4.75 (s, 2H), 4.68 (t,  $J = 6.6$  Hz, 1H), 3.72 (s, 6H).

$^{13}\text{C}$  NMR (151 MHz,  $\text{CDCl}_3$ )  $\delta$  169.4, 151.4, 145.2, 142.1, 141.9, 132.3, 130.6, 130.5, 130.5, 130.3, 129.9, 129.8, 128.8, 127.2, 126.3, 126.1, 122.8, 122.4, 119.6, 68.7, 55.1, 52.9, 48.1.

HRMS (ESI-TOF) calcd for  $\text{C}_{28}\text{H}_{25}\text{Br}_2\text{N}_2\text{O}_4^+$  ( $[\text{M}+\text{H}^+]$ ) = 613.0156, Found 613.0158.

### Dimethyl (*E*)-3-((4-chlorobenzyl)amino)-4-((4-chlorobenzyl)imino)-2-phenylcyclobut-2-ene-1,1-dicarboxylate **3ha**

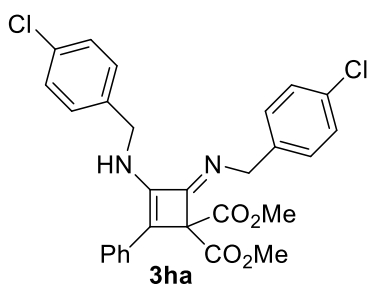

The reaction was run at rt for 14 h, affording product **3ha** in 78% yield (46.6 mg) as a white solid.  $R_f = 0.3$  (PE:EA = 4:1), m.p. 90–92 °C.

$^1\text{H}$  NMR (600 MHz,  $\text{CDCl}_3$ )  $\delta$  7.38 – 7.30 (m, 5H), 7.29 – 7.26 (m, 5H), 7.24 – 7.19 (m, 1H), 7.16 (d,  $J = 8.5$  Hz, 2H), 4.82 (d,  $J = 6.5$  Hz, 2H), 4.73 (s, 2H), 4.64 (t,  $J = 6.6$  Hz, 1H), 3.70 (s, 6H).

$^{13}\text{C}$  NMR (151 MHz,  $\text{CDCl}_3$ )  $\delta$  169.4, 151.1, 145.3, 138.2, 138.1, 133.2, 132.3, 132.3, 128.8, 128.7, 128.7, 128.3, 127.1, 126.2, 119.5, 68.7, 55.0, 52.7, 48.0.

HRMS (ESI-TOF) calcd for  $\text{C}_{28}\text{H}_{25}\text{Cl}_2\text{N}_2\text{O}_4^+$  ( $[\text{M}+\text{H}^+]$ ) = 523.1186, Found 523.1181.

### Dimethyl (*E*)-3-((4-methoxybenzyl)amino)-4-((4-methoxybenzyl)imino)-2-phenylcyclobut-2-ene-1,1-dicarboxylate **3ia**

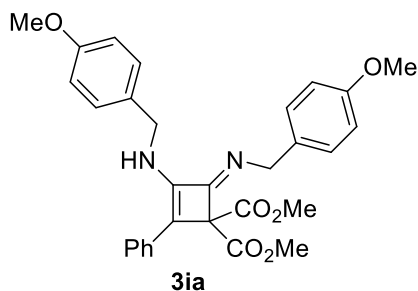

The reaction was run at rt for 14 h, affording product **3ia** in 83% yield (42.8 mg) as a white solid.  $R_f = 0.3$  (PE:EA = 4:1), m.p. 93–95 °C.

$^1\text{H}$  NMR (600 MHz,  $\text{CDCl}_3$ )  $\delta$  7.36 – 7.29 (m, 4H), 7.28 (d,  $J = 8.3$  Hz, 2H), 7.24 – 7.16 (m, 3H), 6.86 (dd,  $J = 8.5, 1.7$  Hz, 4H), 4.78 (d,  $J = 6.2$  Hz, 2H), 4.73 (s, 2H), 4.55 (t,  $J = 6.2$  Hz, 1H), 3.80

(d,  $J = 3.6$  Hz, 6H), 3.72 (s, 6H).

$^{13}\text{C}$  NMR (151 MHz,  $\text{CDCl}_3$ )  $\delta$  169.6, 158.9, 158.3, 150.5, 145.7, 132.5, 131.8, 131.7, 129.0, 128.7, 128.6, 128.6, 126.7, 126.1, 118.5, 113.9, 113.6, 68.7, 55.2, 55.2, 55.2, 52.7, 48.3.

HRMS (ESI-TOF) calcd for  $\text{C}_{30}\text{H}_{31}\text{N}_2\text{O}_6^+$  ( $[\text{M}+\text{H}^+]$ ) = 515.2177, Found 515.2159.

### Dimethyl (*E*)-3-(((1H-indol-4-yl)methyl)amino)-4-(((1H-indol-4-yl)methyl)imino)-2-phenylcyclobut-2-ene-1,1-dicarboxylate **3ja**

The reaction was run at rt for 14 h, affording product **3ja** in 90% yield (48.0 mg) as a yellow solid.

$R_f = 0.3$  (PE:EA = 2:1), m.p. 92–94 °C.

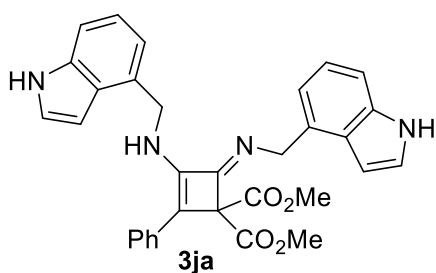

$^1\text{H NMR}$  (600 MHz,  $\text{CDCl}_3$ )  $\delta$  8.28 (d,  $J = 46.7$  Hz, 2H), 7.35 – 7.27 (m, 5H), 7.24 (s, 1H), 7.18 – 7.14 (m, 1H), 7.14 – 7.10 (m, 3H), 7.10 – 7.05 (m, 3H), 6.70 – 6.66 (m, 1H), 6.64 – 6.58 (m, 1H), 5.14 (dd,  $J = 8.8, 2.4$  Hz, 4H), 4.62 (t,  $J = 5.9$  Hz, 1H), 3.70 (s, 6H).

$^{13}\text{C NMR}$  (151 MHz,  $\text{CDCl}_3$ )  $\delta$  169.9, 150.7, 146.1, 135.9, 135.7, 132.7, 131.5, 130.8, 128.5, 126.5, 126.1, 124.3, 123.8, 121.9, 121.8, 118.9, 118.3, 117.9, 110.7, 109.7, 101.2, 100.7, 68.8, 54.1, 52.7, 47.4.

HRMS (ESI–TOF) calcd for  $\text{C}_{32}\text{H}_{29}\text{N}_4\text{O}_4^+$  ( $[\text{M}+\text{H}^+]$ ) = 533.2184, Found 533.2185.

**Dimethyl (*E*)-3-((2-(1H-indol-4-yl)ethyl)amino)-4-((2-(1H-indol-4-yl)ethyl)imino)-2-phenylcyclobut-2-ene-1,1-dicarboxylate **3ka****

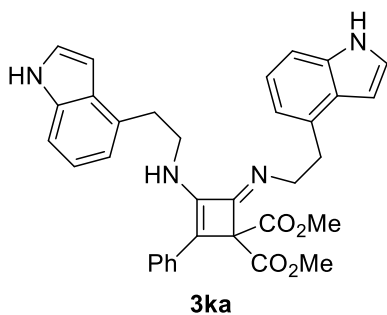

The reaction was run at rt for 14 h, affording product **3ka** in 74% yield (41.5 mg) as a white solid.  $R_f = 0.3$  (PE:EA = 2:1), m.p. 69–71 °C.

$^1\text{H NMR}$  (400 MHz,  $\text{CDCl}_3$ )  $\delta$  8.31 (d,  $J = 31.7$  Hz, 2H), 7.31 – 7.26 (m, 3H), 7.26 – 7.23 (m, 2H), 7.20 – 7.16 (m, 3H), 7.16 – 7.14 (m, 1H), 7.14 – 7.10 (m, 3H), 7.04 (d,  $J = 7.1$  Hz, 1H), 6.95 (d,  $J = 7.1$  Hz, 1H), 6.70 – 6.64 (m, 2H), 4.41 (t,  $J = 6.5$  Hz, 1H), 4.03 – 3.94 (m,

4H), 3.69 (s, 6H), 3.30 (t,  $J = 7.8$  Hz, 2H), 3.18 (t,  $J = 6.7$  Hz, 2H).

$^{13}\text{C NMR}$  (101 MHz,  $\text{CDCl}_3$ )  $\delta$  169.8, 149.9, 146.0, 135.8, 135.7, 132.6, 132.3, 130.8, 128.4, 127.5, 126.3, 125.9, 124.0, 123.7, 122.0, 122.0, 119.9, 119.6, 118.1, 109.6, 109.1, 101.0, 100.8, 68.4, 53.3, 52.6, 45.3, 35.1, 34.8.

HRMS (ESI–TOF) calcd for  $\text{C}_{34}\text{H}_{33}\text{N}_4\text{O}_4^+$  ( $[\text{M}+\text{H}^+]$ ) = 561.2497, Found 561.2501.

**Dimethyl (*E*)-3-((furan-2-ylmethyl)amino)-4-((furan-2-ylmethyl)imino)-2-phenylcyclobut-2-ene-1,1-dicarboxylate **3la****

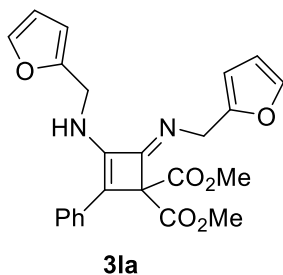

The reaction was run at 50°C for 20 h, affording product **3la** in 46% yield (20.1 mg) as a white solid.  $R_f = 0.3$  (PE:EA = 4:1), m.p. 121–123 °C.

$^1\text{H NMR}$  (600 MHz,  $\text{CDCl}_3$ )  $\delta$  7.39 – 7.30 (m, 6H), 7.23 – 7.18 (m, 1H), 6.33 (dd,  $J = 2.8, 1.9$  Hz, 1H), 6.29 (dd,  $J = 2.9, 1.9$  Hz, 1H), 6.19 (dd,  $J = 7.5,$

3.1 Hz, 2H), 4.77 (d,  $J = 6.3$  Hz, 2H), 4.75 (s, 2H), 4.59 (t,  $J = 6.3$  Hz, 1H), 3.75 (s, 6H).

$^{13}\text{C}$  NMR (151 MHz,  $\text{CDCl}_3$ )  $\delta$  169.3, 152.9, 152.5, 151.6, 145.1, 142.1, 141.7, 132.2, 128.6, 127.1, 126.4, 119.9, 110.4, 110.2, 107.3, 106.5, 68.8, 52.8, 49.2, 41.6.

HRMS (ESI-TOF) calcd for  $\text{C}_{24}\text{H}_{23}\text{N}_2\text{O}_6^+$  ( $[\text{M}+\text{H}^+]$ ) = 435.1551, Found 435.1549.

**Dimethyl (*E*)-3-((2-(allyloxy)-2-oxoethyl)amino)-4-((2-oxo-3-(vinyloxy)propyl)imino)-2-phenyl cyclobut-2-ene-1,1-dicarboxylate **3ma****

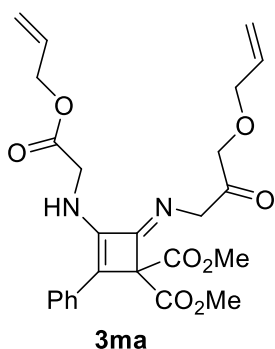

The reaction was run at rt for 14 h, affording product **3ma** in 60% yield (29.6 mg) as a white solid.  $R_f = 0.3$  (PE:EA = 2:1), m.p. 90–92 °C.

$^1\text{H}$  NMR (400 MHz,  $\text{CDCl}_3$ )  $\delta$  7.35 (d,  $J = 4.3$  Hz, 4H), 7.25 – 7.20 (m, 1H), 5.99 – 5.86 (m, 2H), 5.38 – 5.35 (m, 1H), 5.33 – 5.31 (m, 1H), 5.27 – 5.26 (m, 1H), 5.25 – 5.23 (m, 1H), 4.83 (t,  $J = 5.5$  Hz, 1H), 4.69 – 4.64 (m, 4H), 4.49 (d,  $J = 5.5$  Hz, 2H), 4.42 (s, 2H), 3.74 (s, 6H).

$^{13}\text{C}$  NMR (101 MHz,  $\text{CDCl}_3$ )  $\delta$  170.5, 169.7, 169.0, 153.1, 144.1, 131.9, 131.5, 128.6, 127.3, 126.5, 120.7, 118.8, 118.4, 68.7, 66.0, 65.4, 53.4, 52.9, 46.0.

HRMS (ESI-TOF) calcd for  $\text{C}_{24}\text{H}_{27}\text{N}_2\text{O}_8^+$  ( $[\text{M}+\text{H}^+]$ ) = 471.1762, Found 471.1762.

## 6. General procedure and spectral data of products 5

A dry reaction tube was charged with isocyanides **1** (0.2 mmol, 2 equiv.), La(OTf)<sub>3</sub> (10 mol%) and 3-methyleneoxindoles **4** (0.1 mmol, 1 equiv.), Et<sub>2</sub>O (0.5 mL) was added. The reaction mixture continued stirring at rt for 14 h. The residue was directly purified by flash chromatography on silica gel using petroleum ether/ethyl acetate= 5/1 as eluent to afford the desired products **5aa**.

### Tert-butyl-3-(benzylamino)-4-(benzylimino)-2-(tert-butyl)-2'-oxospiro[cyclobutane-1,3'-indolin]-2-ene-1'-carboxylate **5aa**

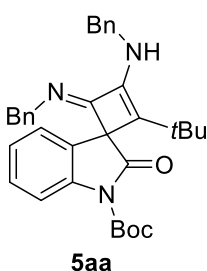

The reaction was run at rt for 14 h, affording product **5aa** in 83% yield (44.5 mg) as a yellow solid.  $R_f = 0.5$  (PE:EA = 5:1), m.p. 120–121 °C.

<sup>1</sup>H NMR (600 MHz, CDCl<sub>3</sub>)  $\delta$  7.88 (d,  $J = 8.1$  Hz, 1H), 7.40 (d,  $J = 7.2$  Hz, 2H), 7.37 (t,  $J = 7.5$  Hz, 2H), 7.33 (t,  $J = 7.9$  Hz, 1H), 7.29 (t,  $J = 7.3$  Hz, 1H), 7.18 (m, 3H), 7.15 (d,  $J = 7.0$  Hz, 1H), 7.12 (t,  $J = 7.5$  Hz, 1H), 6.93 (d,  $J = 7.2$  Hz, 2H),

4.76 (ddd,  $J = 35.0, 14.7, 6.1$  Hz, 2H), 4.08 (d,  $J = 14.2$  Hz, 1H), 4.02 (t,  $J = 6.0$  Hz, 1H), 3.83 (d,  $J = 14.2$  Hz, 1H), 1.64 (s, 9H), 1.01 (s, 9H).

<sup>13</sup>C NMR (151 MHz, CDCl<sub>3</sub>)  $\delta$  175.2, 154.5, 149.5, 146.1, 140.5, 139.0, 138.3, 132.9, 128.7, 128.5, 128.2, 128.0, 127.7, 127.6, 127.1, 126.5, 124.4, 123.5, 115.2, 84.2, 65.6, 55.6, 49.0, 34.4, 29.2, 28.1.

HRMS (ESI-TOF) calcd for C<sub>34</sub>H<sub>38</sub>N<sub>3</sub>O<sub>3</sub><sup>+</sup> ([M+H<sup>+</sup>]) = 536.2908, Found 536.2901.

### 1'-acetyl-3-(benzylamino)-4-(benzylimino)-2-(tert-butyl)spiro[cyclobutane-1,3'-indolin]-2-ene-2'-one **5ab**

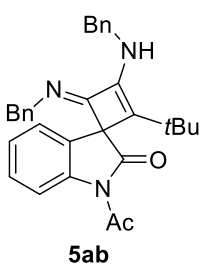

The reaction was run at rt for 14 h, affording product **5ab** in 79% yield (37.7 mg) as a yellow solid.  $R_f = 0.5$  (PE:EA = 5:1), m.p. 98–100 °C.

<sup>1</sup>H NMR (400 MHz, CDCl<sub>3</sub>)  $\delta$  8.26 (d,  $J = 8.1$  Hz, 1H), 7.42 – 7.36 (m, 4H), 7.36 – 7.34 (m, 1H), 7.33 – 7.27 (m, 1H), 7.22 – 7.10 (m, 5H), 6.92 – 6.85 (m, 2H), 4.87 – 4.70 (m, 2H), 4.06 (t,  $J = 6.1$  Hz, 1H), 3.97 (d,  $J = 14.3$  Hz, 1H), 3.87 (d,  $J = 15.6$  Hz, 1H), 2.61 (s, 3H), 0.99 (s, 9H).

<sup>13</sup>C NMR (101 MHz, CDCl<sub>3</sub>)  $\delta$  178.0, 171.2, 154.5, 146.3, 140.5, 138.9, 138.8, 132.8, 129.0, 128.6,

128.5, 128.1, 127.6, 127.4, 127.3, 126.6, 125.3, 123.4, 116.9, 65.7, 55.3, 49.0, 34.6, 29.2, 26.6.

HRMS (ESI-TOF) calcd for C<sub>32</sub>H<sub>32</sub>N<sub>3</sub>O<sub>2</sub><sup>+</sup> ([M+H<sup>+</sup>]) = 478.2490, Found 478.2491.

### Methyl-3-(benzylamino)-4-(benzylimino)-2-(tert-butyl)-2'-oxospiro[cyclobutane-1,3'-indolin]-2-ene-1'-carboxylate **5ac**



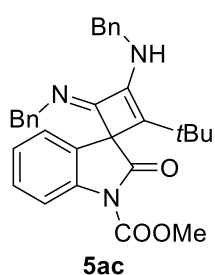

The reaction was run at rt for 14 h, affording product **5ac** in 83% yield (41.0 mg) as a yellow solid.  $R_f = 0.4$  (PE:EA = 5:1), m.p. 103–105 °C.

$^1\text{H NMR}$  (600 MHz,  $\text{CDCl}_3$ )  $\delta$  7.97 (d,  $J = 8.1$  Hz, 1H), 7.42 – 7.38 (m, 2H), 7.38 – 7.33 (m, 3H), 7.29 (t,  $J = 7.2$  Hz, 1H), 7.19 – 7.11 (m, 5H), 6.91 – 6.83 (m, 2H), 4.76 (qd,  $J = 14.8, 6.6$  Hz, 2H), 4.10 (d,  $J = 14.4$  Hz, 1H), 4.05 (t,  $J = 6.2$ , 1H), 4.03 (s, 3H), 3.79 (d,  $J = 14.4$  Hz, 1H), 1.00 (s, 9H).

$^{13}\text{C NMR}$  (151 MHz,  $\text{CDCl}_3$ )  $\delta$  175.1, 154.1, 151.8, 146.3, 140.6, 138.9, 138.2, 132.9, 128.9, 128.6, 128.3, 128.0, 127.6, 127.5, 127.2, 126.5, 124.8, 123.6, 115.3, 65.6, 55.5, 53.9, 49.0, 34.5, 29.2.

HRMS (ESI–TOF) calcd for  $\text{C}_{31}\text{H}_{32}\text{N}_3\text{O}_3^+$  ( $[\text{M}+\text{H}^+]$ ) = 494.2439, Found 494.2436.

**Benzyl-3-(benzylamino)-4-(benzylimino)-2-(tert-butyl)-2'-oxospiro[cyclobutane-1,3'-indolin]-2-ene-1'-carboxylate **5ad****

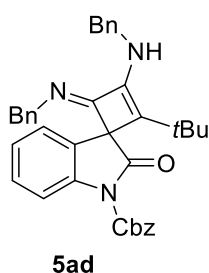

The reaction was run at rt for 14 h, affording product **5ad** in 74% yield (42.2 mg) as a yellow solid.  $R_f = 0.4$  (PE:EA = 5:1), m.p. 118–120 °C.

$^1\text{H NMR}$  (400 MHz,  $\text{CDCl}_3$ )  $\delta$  7.95 (d,  $J = 8.1$  Hz, 1H), 7.54 – 7.48 (m, 2H), 7.43 – 7.27 (m, 9H), 7.21 – 7.10 (m, 5H), 6.93 – 6.86 (m, 2H), 5.54 – 5.41 (m, 2H), 4.77 (qd,  $J = 14.6, 6.6$  Hz, 2H), 4.07 (d,  $J = 9.7$  Hz, 1H), 4.05 – 4.01 (m, 1H),

3.81 (d,  $J = 14.3$  Hz, 1H), 1.01 (s, 9H).

$^{13}\text{C NMR}$  (101 MHz,  $\text{CDCl}_3$ )  $\delta$  175.2, 154.2, 151.1, 146.3, 140.5, 138.9, 138.3, 135.1, 132.8, 129.0, 128.7, 128.6, 128.4, 128.3, 128.1, 127.8, 127.7, 127.6, 127.2, 126.6, 124.9, 123.6, 115.4, 68.5, 65.6, 55.7, 49.1, 34.6, 29.3.

HRMS (ESI–TOF) calcd for  $\text{C}_{37}\text{H}_{36}\text{N}_3\text{O}_3^+$  ( $[\text{M}+\text{H}^+]$ ) = 570.2752, Found 570.2747.

**2,2,2-trichloroethyl-3-(benzylamino)-4-(benzylimino)-2-(tert-butyl)-2'-oxospiro[cyclobutane-1,3'-indolin]-2-ene-1'-carboxylate **5ae****

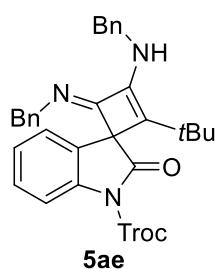

The reaction was run at rt for 14 h, affording product **5ae** in 87% yield (53.1 mg) as a yellow solid.  $R_f = 0.5$  (PE:EA = 5:1), m.p. 102–103 °C.

$^1\text{H NMR}$  (400 MHz,  $\text{CDCl}_3$ )  $\delta$  8.00 (d,  $J = 8.2$  Hz, 1H), 7.41 – 7.38 (m, 1H), 7.38 – 7.37 (m, 2H), 7.37 – 7.33 (m, 2H), 7.32 – 7.27 (m, 1H), 7.23 – 7.17 (m, 2H), 7.17 – 7.11 (m, 3H), 6.94 – 6.86 (m, 2H), 5.07 (s, 2H), 4.76 (ddd,  $J = 36.4, 14.8,$

6.5 Hz, 2H), 4.07 (d,  $J = 14.3$  Hz, 2H), 3.83 (d,  $J = 14.3$  Hz, 1H), 1.01 (s, 9H).

$^{13}\text{C NMR}$  (101 MHz,  $\text{CDCl}_3$ )  $\delta$  174.8, 153.8, 149.6, 146.4, 140.4, 138.7, 137.6, 132.6, 129.1, 128.6,

128.4, 128.1, 127.6, 127.6, 127.2, 126.6, 125.3, 123.8, 115.5, 94.3, 75.5, 65.4, 55.7, 49.0, 34.6, 29.2.  
HRMS (ESI-TOF) calcd for C<sub>32</sub>H<sub>31</sub>Cl<sub>3</sub>N<sub>3</sub>O<sub>3</sub><sup>+</sup>([M+H<sup>+</sup>]) = 610.1426, Found 610.1426.

**3-(benzylamino)-4-(benzylimino)-2-(tert-butyl)-1'-tosylspiro[cyclobutane-1,3'-indolin]-2-en-2'-one 5af**

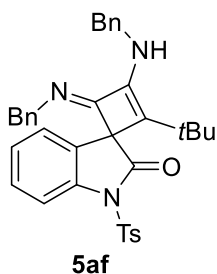

The reaction was run at rt for 14 h, affording product **5af** in 76% yield (44.8 mg) as a yellow solid. R<sub>f</sub> = 0.4 (PE:EA = 5:1), m.p. 137–138 °C.

<sup>1</sup>H NMR (600 MHz, CDCl<sub>3</sub>) δ 8.03 (d, *J* = 8.2 Hz, 1H), 7.97 – 7.93 (m, 2H), 7.39 – 7.36 (m, 1H), 7.36 – 7.33 (m, 4H), 7.28 (m, 1H), 7.17 – 7.09 (m, 7H), 6.74 – 6.62 (m, 2H), 4.75 – 4.63 (m, 2H), 4.01 (t, *J* = 6.6 Hz, 1H), 3.43 (d, *J* = 14.5 Hz, 1H), 3.32 (d, *J* = 14.5 Hz, 1H), 2.28 (s, 3H), 0.91 (s, 9H).

<sup>13</sup>C NMR (151 MHz, CDCl<sub>3</sub>) δ 175.0, 153.5, 146.2, 145.5, 140.4, 138.6, 138.0, 134.8, 132.6, 129.6, 129.2, 128.5, 128.4, 127.9, 127.7, 127.5, 127.4, 127.1, 126.5, 124.8, 123.9, 113.9, 65.2, 55.4, 48.9, 34.4, 29.0, 21.5.

HRMS (ESI-TOF) calcd for C<sub>36</sub>H<sub>36</sub>N<sub>3</sub>O<sub>3</sub>S<sup>+</sup>([M+H<sup>+</sup>]) = 590.2472, Found 590.2476.

**Tert-butyl-3-(benzylamino)-4-(benzylimino)-2-(tert-butyl)-5'-fluoro-2'-oxospiro[cyclobutane-1,3'-indolin]-2-ene-1'-carboxylate 5ag**

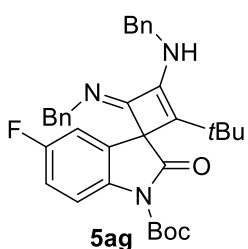

The reaction was run at rt for 14 h, affording product **5ag** in 81% yield (44.9 mg) as a yellow solid. R<sub>f</sub> = 0.4 (PE:EA = 5:1), m.p. 87–88 °C.

<sup>1</sup>H NMR (600 MHz, CDCl<sub>3</sub>) δ 7.85 (q, *J* = 4.4 Hz, 1H), 7.40 – 7.32 (m, 4H), 7.31 – 7.27 (m, 1H), 7.21 – 7.13 (m, 3H), 7.01 (td, *J* = 8.9, 2.8 Hz, 1H), 6.96 – 6.91 (m, 2H), 6.85 (dd, *J* = 7.6, 2.8 Hz, 1H), 4.74 (ddd, *J* = 40.5, 14.7, 6.7 Hz,

2H), 4.07 (d, *J* = 14.2 Hz, 1H), 4.02 (t, *J* = 6.6 Hz, 1H), 3.82 (d, *J* = 14.2 Hz, 1H), 1.62 (s, 9H), 1.00 (s, 9H).

<sup>13</sup>C NMR (101 MHz, CDCl<sub>3</sub>) δ 174.8, 160.1 (*J* = 246.1 Hz), 153.6, 149.5, 146.4, 140.4, 138.7, 134.6, 132.5, 130.5 (*J* = 8.0 Hz), 128.6, 128.1, 127.6, 127.3, 126.7, 116.6 (*J* = 7.7 Hz), 115.3 (*J* = 23.2 Hz), 110.8 (*J* = 24.5 Hz), 84.4, 65.8, 55.7, 49.0, 34.5, 29.2, 28.1.

<sup>19</sup>F NMR (565 MHz, CDCl<sub>3</sub>) δ -117.7.

HRMS (ESI-TOF) calcd for C<sub>34</sub>H<sub>37</sub>FN<sub>3</sub>O<sub>3</sub><sup>+</sup>([M+H<sup>+</sup>]) = 554.2814, Found 554.2813.

**Tert-butyl-3-(benzylamino)-4-(benzylimino)-5'-bromo-2-(tert-butyl)-2'-oxospiro[cyclobutane-1,3'-indolin]-2-ene-1'-carboxylate 5ah**

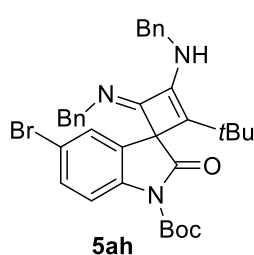

The reaction was run at rt for 14 h, affording product **5ah** in 83% yield (51.0 mg) as a yellow solid.  $R_f = 0.4$  (PE:EA = 5:1), m.p. 162–163 °C.

$^1\text{H NMR}$  (600 MHz,  $\text{CDCl}_3$ )  $\delta$  7.76 (d,  $J = 8.6$  Hz, 1H), 7.43 (dd,  $J = 8.6, 2.1$  Hz, 1H), 7.37 (s, 2H), 7.37–7.36 (m, 2H), 7.33–7.28 (m, 1H), 7.22 (d,  $J = 2.1$  Hz, 1H), 7.21–7.14 (m, 3H), 6.94–6.86 (m, 2H), 4.74 (ddd,  $J = 30.2, 14.6,$

6.8 Hz, 2H), 4.08 (d,  $J = 14.0$  Hz, 1H), 4.03 (t,  $J = 6.5$  Hz, 1H), 3.82 (d,  $J = 14.0$  Hz, 1H), 1.62 (s, 9H), 1.00 (s, 9H).

$^{13}\text{C NMR}$  (151 MHz,  $\text{CDCl}_3$ )  $\delta$  174.3, 153.5, 149.3, 146.5, 140.3, 138.6, 137.7, 132.5, 131.6, 130.7, 128.6, 128.1, 127.6, 127.6, 127.3, 126.7, 126.5, 117.6, 116.9, 84.6, 65.4, 55.8, 49.0, 34.5, 29.2, 28.1.

HRMS (ESI–TOF) calcd for  $\text{C}_{34}\text{H}_{37}\text{BrN}_3\text{O}_3^+$  ( $[\text{M}+\text{H}^+]$ ) = 614.2013, Found 614.2010.

### Tert-butyl-3-(benzylamino)-4-(benzylimino)-2-(tert-butyl)-5'-methyl-2'-oxospiro[cyclobutane-1,3'-indolin]-2-ene-1'-carboxylate **5ai**

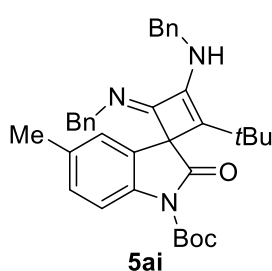

The reaction was run at rt for 14 h, affording product **5ai** in 70% yield (38.5 mg) as a yellow solid.  $R_f = 0.5$  (PE:EA = 5:1), m.p. 70–71 °C.

$^1\text{H NMR}$  (600 MHz,  $\text{CDCl}_3$ )  $\delta$  7.72 (d,  $J = 8.2$  Hz, 1H), 7.41–7.38 (m, 2H), 7.37–7.33 (m, 2H), 7.32–7.27 (m, 1H), 7.19–7.12 (m, 3H), 7.12–7.09 (m, 1H), 6.93–6.88 (m, 3H), 4.74 (qd,  $J = 14.7, 6.4$  Hz, 2H), 4.09 (d,  $J = 14.1$

Hz, 1H), 3.99 (t,  $J = 6.6$  Hz, 1H), 3.79 (d,  $J = 14.1$  Hz, 1H), 2.28 (s, 3H), 1.63 (s, 9H), 1.00 (s, 9H).

$^{13}\text{C NMR}$  (151 MHz,  $\text{CDCl}_3$ )  $\delta$  175.4, 154.7, 149.6, 146.1, 140.5, 139.0, 136.3, 134.0, 133.3, 129.2, 128.5, 128.2, 127.9, 127.7, 127.7, 127.2, 126.5, 124.1, 115.0, 84.0, 65.6, 55.7, 49.0, 34.5, 29.2, 28.1, 21.0.

HRMS (ESI–TOF) calcd for  $\text{C}_{35}\text{H}_{40}\text{N}_3\text{O}_3^+$  ( $[\text{M}+\text{H}^+]$ ) = 550.3065, Found 550.3063.

### Tert-butyl-3-(benzylamino)-4-(benzylimino)-2-(tert-butyl)-6'-chloro-2'-oxospiro[cyclobutane-1,3'-indolin]-2-ene-1'-carboxylate **5aj**

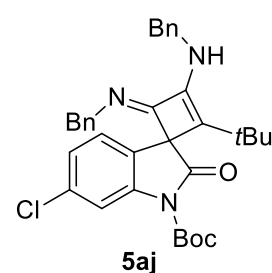

The reaction was run at rt for 14 h, affording product **5aj** in 82% yield (46.7 mg) as a yellow solid.  $R_f = 0.3$  (PE:EA = 5:1), m.p. 73–74 °C.

$^1\text{H NMR}$  (600 MHz,  $\text{CDCl}_3$ )  $\delta$  7.77 (d,  $J = 8.6$  Hz, 1H), 7.44 (dt,  $J = 8.7, 1.6$  Hz, 1H), 7.37 (d,  $J = 5.9$  Hz, 4H), 7.31 (dq,  $J = 6.2, 2.9$  Hz, 1H), 7.23 (s, 1H), 7.19 (dt,  $J = 14.4, 6.8$  Hz, 3H), 6.92 (d,  $J = 7.4$  Hz, 2H), 4.79–4.70 (m, 2H),

4.09 (d,  $J = 14.1$  Hz, 1H), 4.06 (d,  $J = 6.7$  Hz, 1H), 3.83 (d,  $J = 14.1$  Hz, 1H), 1.63 (s, 9H), 1.01 (s, 9H).

$^{13}\text{C}$  NMR (151 MHz,  $\text{CDCl}_3$ )  $\delta$  174.7, 153.9, 149.3, 146.3, 140.4, 139.5, 138.8, 134.4, 132.4, 128.6, 128.1, 127.6, 127.2, 126.7, 126.6, 124.5, 124.3, 116.0, 84.7, 65.2, 55.7, 49.0, 34.5, 29.2, 28.0.

HRMS (ESI-TOF) calcd for  $\text{C}_{34}\text{H}_{37}\text{ClN}_3\text{O}_3^+([\text{M}+\text{H}^+]) = 570.2518$ , Found 570.2517.

### Tert-butyl-3-(benzylamino)-4-(benzylimino)-6'-bromo-2-(tert-butyl)-2'-oxospiro[cyclobutane-1,3'-indolin]-2-ene-1'-carboxylate **5ak**

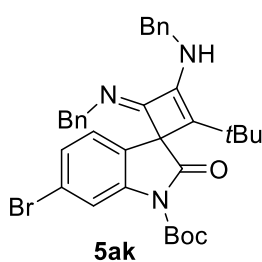

The reaction was run at rt for 14 h, affording product **5ak** in 80% yield (49.2 mg) as a yellow solid.  $R_f = 0.3$  (PE:EA = 5:1), m.p. 89–91 °C.

$^1\text{H}$  NMR (600 MHz,  $\text{CDCl}_3$ )  $\delta$  8.10 (d,  $J = 1.7$  Hz, 1H), 7.39 – 7.37 (m, 2H), 7.37 – 7.33 (m, 2H), 7.31 – 7.27 (m, 1H), 7.24 (dd,  $J = 8.0, 1.8$  Hz, 1H), 7.21 – 7.17 (m, 2H), 7.17 – 7.13 (m, 1H), 7.00 (d,  $J = 8.0$  Hz, 1H), 6.96 – 6.91 (m,

2H), 4.74 (qd,  $J = 14.7, 6.5$  Hz, 2H), 4.06 (d,  $J = 14.3$  Hz, 1H), 4.02 (t,  $J = 6.5$  Hz, 1H), 3.82 (d,  $J = 14.3$  Hz, 1H), 1.62 (s, 9H), 0.99 (s, 9H).

$^{13}\text{C}$  NMR (151 MHz,  $\text{CDCl}_3$ )  $\delta$  174.6, 153.7, 149.3, 146.3, 140.4, 139.6, 138.7, 132.4, 128.6, 128.1, 127.6, 127.4, 127.3, 127.2, 126.6, 124.7, 122.2, 118.7, 84.8, 65.3, 55.7, 49.0, 34.5, 29.2, 28.0.

HRMS (ESI-TOF) calcd for  $\text{C}_{34}\text{H}_{37}\text{BrN}_3\text{O}_3^+([\text{M}+\text{H}^+]) = 614.2013$ , Found 614.2011.

### Tert-butyl-3-(benzylamino)-4-(benzylimino)-7'-bromo-2-(tert-butyl)-2'-oxospiro[cyclobutane-1,3'-indolin]-2-ene-1'-carboxylate **5al**

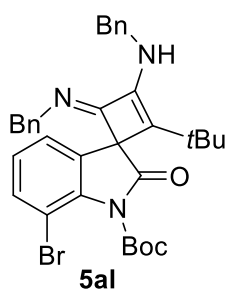

The reaction was run at rt for 14 h, affording product **5al** in 82% yield (50.4 mg) as a yellow solid.  $R_f = 0.3$  (PE:EA = 5:1), m.p. 103–105 °C.

$^1\text{H}$  NMR (400 MHz,  $\text{CDCl}_3$ )  $\delta$  7.47 (dd,  $J = 8.1, 1.2$  Hz, 1H), 7.42 – 7.33 (m, 4H), 7.32 – 7.27 (m, 1H), 7.21 – 7.11 (m, 3H), 7.09 (dd,  $J = 7.5, 1.2$  Hz, 1H), 7.00 – 6.93 (m, 3H), 4.83 – 4.70 (m, 2H), 4.11 (d,  $J = 14.4$  Hz, 1H), 4.06 (t,  $J = 6.7$  Hz, 1H), 3.87 (d,  $J = 14.4$  Hz, 1H), 1.59 (s, 9H), 1.02 (s, 9H).

$^{13}\text{C}$  NMR (151 MHz,  $\text{CDCl}_3$ )  $\delta$  175.6, 153.6, 148.3, 146.1, 140.4, 138.8, 137.7, 133.2, 132.2, 131.9, 128.5, 128.0, 127.5, 127.5, 127.2, 126.5, 125.3, 122.5, 106.9, 85.2, 66.1, 55.8, 48.9, 34.4, 29.1, 27.6.

HRMS (ESI-TOF) calcd for  $\text{C}_{34}\text{H}_{37}\text{BrN}_3\text{O}_3^+([\text{M}+\text{H}^+]) = 614.2013$ , Found 614.2014.

### Tert-butyl-2-(tert-butyl)-3-((2-fluorobenzyl)amino)-4-((2-fluorobenzyl)imino)-2'-oxospiro[cyclobutane-1,3'-indolin]-2-ene-1'-carboxylate **5ba**

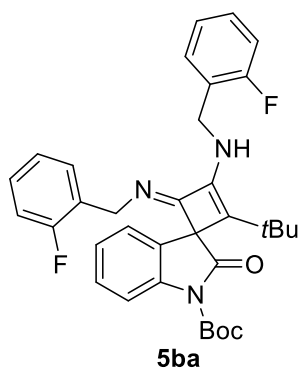

The reaction was run at rt for 14 h, affording product **5ba** in 65% yield (37.2 mg) as a yellow solid.  $R_f = 0.3$  (PE:EA = 5:1), m.p. 91–92 °C.

$^1\text{H NMR}$  (600 MHz,  $\text{CDCl}_3$ )  $\delta$  7.84 (dt,  $J = 8.2, 0.8$  Hz, 1H), 7.42 (td,  $J = 7.6, 1.5$  Hz, 1H), 7.32 – 7.25 (m, 2H), 7.15 – 7.11 (m, 1H), 7.10 – 7.04 (m, 3H), 7.03 – 7.01 (m, 1H), 7.00 – 6.96 (m, 2H), 6.92 – 6.85 (m, 1H), 4.84 (dd,  $J = 15.0, 7.5$  Hz, 1H), 4.70 (dd,  $J = 15.0, 6.3$  Hz, 1H), 4.14 (t,  $J = 6.9$  Hz, 1H), 4.07 (d,  $J = 14.5$  Hz, 1H), 3.91 (d,  $J = 14.9$  Hz, 1H), 1.62 (s, 9H),

0.98 (s, 9H).

$^{13}\text{C NMR}$  (151 MHz,  $\text{CDCl}_3$ )  $\delta$  174.9, 161.4 (d,  $J = 133.1$  Hz, 1C), 159.8 (d,  $J = 134.0$  Hz, 1C), 155.2, 149.4, 145.9, 138.7, 134.3, 130.3 (d,  $J = 4.7$  Hz, 1C), 129.8 (d,  $J = 4.4$  Hz, 1C), 128.9 (d,  $J = 8.2$  Hz, 1C), 128.8, 128.1 (d,  $J = 8.0$  Hz, 1C), 127.8, 127.4 (d,  $J = 14.5$  Hz, 1C), 126.1 (d,  $J = 14.7$  Hz, 1C), 124.3, 124.1 (d,  $J = 3.5$  Hz, 1C), 123.7, 123.1 (d,  $J = 3.0$  Hz, 1C), 123.4, 115.2, 115.0, 114.6 (d,  $J = 21.5$  Hz, 1C), 84.1, 65.4, 48.4 (d,  $J = 3.0$  Hz, 1C), 43.1 (d,  $J = 3.0$  Hz, 1C), 34.4, 29.1, 28.0.

$^{19}\text{F NMR}$  (565 MHz,  $\text{CDCl}_3$ )  $\delta$  -119.04, -119.65.

HRMS (ESI–TOF) calcd for  $\text{C}_{34}\text{H}_{36}\text{F}_2\text{N}_3\text{O}_3^+$  ( $[\text{M}+\text{H}^+]$ ) = 572.2720, Found 572.2720.

**Tert-butyl-2-(tert-butyl)-3-((2-chlorobenzyl)amino)-4-((2-chlorobenzyl)imino)-2'-oxospiro[clobutane-1,3'-indolin]-2-ene-1'-carboxylate **5ca****

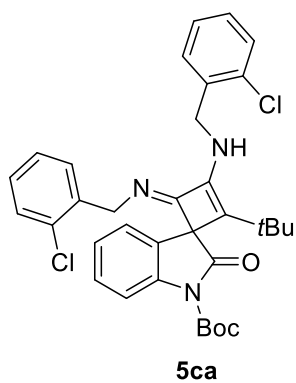

The reaction was run at rt for 14 h, affording product **5ca** in 77% yield (46.6 mg) as a yellow solid.  $R_f = 0.3$  (PE:EA = 5:1), m.p. 91–93 °C.

$^1\text{H NMR}$  (600 MHz,  $\text{CDCl}_3$ )  $\delta$  7.83 (d,  $J = 8.1$  Hz, 1H), 7.50 (dd,  $J = 6.9, 1.7$  Hz, 1H), 7.39 (dd,  $J = 7.3, 1.8$  Hz, 1H), 7.30 – 7.22 (m, 3H), 7.21 – 7.19 (m, 1H), 7.15 – 7.07 (m, 3H), 7.04 (td,  $J = 7.5, 1.0$  Hz, 1H), 6.99 (dd,  $J = 7.5, 1.5$  Hz, 1H), 4.88 (dd,  $J = 15.1, 7.5$  Hz, 1H), 4.75 (dd,  $J = 15.1, 6.5$  Hz, 1H), 4.39 (t,  $J = 7.0$  Hz, 1H), 4.10 (d,  $J = 16.0$  Hz, 1H), 3.93 (d,  $J = 16.0$  Hz,

1H), 1.61 (s, 9H), 0.98 (s, 9H).

$^{13}\text{C NMR}$  (101 MHz,  $\text{CDCl}_3$ )  $\delta$  174.8, 155.4, 149.4, 145.8, 138.8, 137.7, 136.8, 134.3, 133.3, 132.7, 130.3, 129.4, 129.1, 128.8, 128.7, 128.6, 127.8, 127.7, 127.0, 126.5, 124.2, 123.3, 115.2, 84.1, 65.5, 52.2, 46.7, 34.4, 29.1, 28.1.

HRMS (ESI–TOF) calcd for  $\text{C}_{34}\text{H}_{36}\text{Cl}_2\text{N}_3\text{O}_3^+$  ( $[\text{M}+\text{H}^+]$ ) = 604.2129, Found 604.2132.

**Tert-butyl-2-(tert-butyl)-3-((2-methylbenzyl)amino)-4-((2-methylbenzyl)imino)-2'-oxospiro[c**

### **cyclobutane-1,3'-indolin]-2-ene-1'-carboxylate 5da**

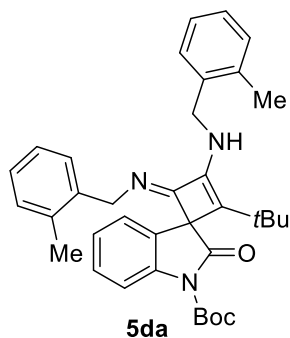

The reaction was run at rt for 14 h, affording product **5da** in 69% yield (38.9 mg) as a yellow solid.  $R_f = 0.5$  (PE:EA = 5:1), m.p. 81–83 °C.

$^1\text{H NMR}$  (600 MHz,  $\text{CDCl}_3$ )  $\delta$  7.87 (d,  $J = 8.1$  Hz, 1H), 7.41 – 7.35 (m, 1H), 7.32 (td,  $J = 7.8, 1.4$  Hz, 1H), 7.25 – 7.16 (m, 4H), 7.12 (td,  $J = 7.5, 1.1$  Hz, 1H), 7.06 (td,  $J = 7.3, 1.4$  Hz, 1H), 7.03 – 6.97 (m, 2H), 6.77 (d,  $J = 7.5$  Hz, 1H), 4.87 (dd,  $J = 14.6, 6.8$  Hz, 1H), 4.71 (dd,  $J = 14.6, 5.7$  Hz, 1H), 4.06 (d,

$J = 14.9$  Hz, 1H), 3.89 (t,  $J = 6.3$  Hz, 1H), 3.75 (d,  $J = 14.9$  Hz, 1H), 2.39 (s, 3H), 2.04 (s, 3H), 1.65 (s, 9H), 1.03 (s, 9H).

$^{13}\text{C NMR}$  (151 MHz,  $\text{CDCl}_3$ )  $\delta$  175.3, 154.2, 149.5, 146.1, 138.7, 138.1, 137.2, 136.4, 135.9, 131.6, 130.4, 129.7, 128.7, 128.3, 127.9, 127.9, 127.3, 126.6, 126.0, 125.6, 124.4, 123.6, 115.1, 84.2, 65.6, 53.2, 47.0, 34.4, 29.3, 28.1, 19.1, 18.8.

HRMS (ESI–TOF) calcd for  $\text{C}_{36}\text{H}_{42}\text{N}_3\text{O}_3^+$  ( $[\text{M}+\text{H}^+]$ ) = 564.3221, Found 564.3224.

### **Tert-butyl-2-(tert-butyl)-3-((3-chlorobenzyl)amino)-4-((3-chlorobenzyl)imino)-2'-oxospiro[cyclobutane-1,3'-indolin]-2-ene-1'-carboxylate 5ea**

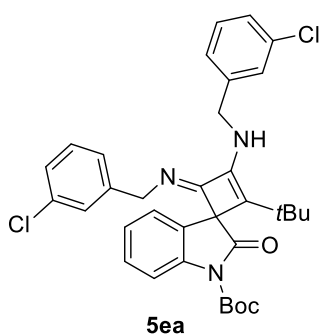

The reaction was run at rt for 14 h, affording product **5ea** in 72% yield (43.7mg) as a yellow solid.  $R_f = 0.4$  (PE:EA = 5:1), m.p. 88–89 °C.

$^1\text{H NMR}$  (600 MHz,  $\text{CDCl}_3$ )  $\delta$  7.86 (d,  $J = 8.1$  Hz, 1H), 7.37 (s, 1H), 7.35 – 7.31 (m, 1H), 7.31 – 7.24 (m, 3H), 7.16 – 7.05 (m, 4H), 6.80 (s, 1H), 6.78 (dt,  $J = 7.0, 1.7$  Hz, 1H), 4.79 (dd,  $J = 15.2, 7.2$  Hz, 1H), 4.64 (dd,  $J = 15.2, 6.2$  Hz, 1H), 4.08 –

4.00 (m, 2H), 3.72 (d,  $J = 14.4$  Hz, 1H), 1.64 (s, 9H), 1.00 (s, 9H).

$^{13}\text{C NMR}$  (101 MHz,  $\text{CDCl}_3$ )  $\delta$  175.0, 155.0, 149.5, 145.7, 142.7, 140.8, 138.7, 134.4, 133.9, 133.8, 129.9, 129.3, 129.0, 127.8, 127.7, 127.5, 127.3, 126.7, 125.8, 125.6, 124.5, 123.6, 115.3, 84.4, 65.5, 55.0, 48.3, 34.5, 29.1, 28.1.

HRMS (ESI–TOF) calcd for  $\text{C}_{34}\text{H}_{36}\text{Cl}_2\text{N}_3\text{O}_3^+$  ( $[\text{M}+\text{H}^+]$ ) = 604.2129, Found 604.2130.

### **Tert-butyl-3-((3-bromobenzyl)amino)-4-((3-bromobenzyl)imino)-2-(tert-butyl)-2'-oxospiro[cyclobutane-1,3'-indolin]-2-ene-1'-carboxylate 5fa**

The reaction was run at rt for 14 h, affording product **5fa** in 67% yield (46.5 mg) as a yellow solid.  $R_f = 0.4$  (PE:EA = 5:1), m.p. 62–64 °C.

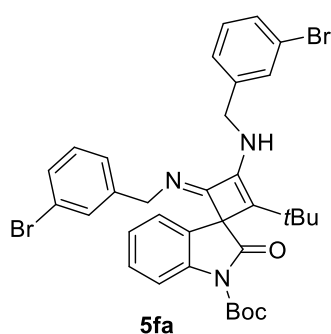

$^1\text{H}$  NMR (600 MHz,  $\text{CDCl}_3$ )  $\delta$  7.86 (d,  $J = 8.1$  Hz, 1H), 7.53 (s, 1H), 7.41 (ddd,  $J = 7.9, 2.0, 1.1$  Hz, 1H), 7.36 – 7.28 (m, 2H), 7.26 – 7.21 (m, 2H), 7.15 – 7.10 (m, 2H), 7.02 (t,  $J = 7.8$  Hz, 1H), 6.93 (s, 1H), 6.82 (dt,  $J = 7.6, 1.3$  Hz, 1H), 4.79 (dd,  $J = 15.2, 7.3$  Hz, 1H), 4.62 (dd,  $J = 15.2, 6.2$  Hz, 1H), 4.08 – 4.01 (m, 2H), 3.70 (d,  $J = 14.3$  Hz, 1H), 1.64 (s, 9H), 1.00 (s, 9H).

$^{13}\text{C}$  NMR (151 MHz,  $\text{CDCl}_3$ )  $\delta$  175.0, 155.0, 149.4, 145.6, 142.9, 141.1, 138.6, 133.9, 130.6, 130.4, 130.2, 129.7, 129.6, 129.0, 127.7, 126.3, 126.1, 124.6, 123.6, 122.6, 122.1, 115.3, 84.4, 65.4, 55.0, 48.2, 34.5, 29.1, 28.1.

HRMS (ESI-TOF) calcd for  $\text{C}_{34}\text{H}_{36}\text{Br}_2\text{N}_3\text{O}_3^+$  ( $[\text{M}+\text{H}^+]$ ) = 694.1098, Found 694.1100.

**Tert-butyl-2-(tert-butyl)-3-((3-methylbenzyl)amino)-4-((3-methylbenzyl)imino)-2'-oxospiro [cyclobutane-1,3'-indolin]-2-ene-1'-carboxylate **5ga****

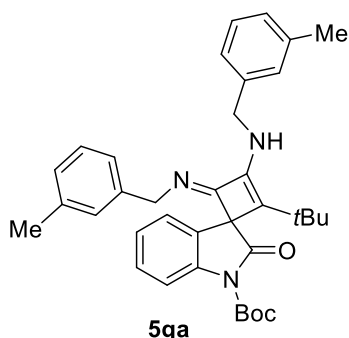

The reaction was run at rt for 14 h, affording product **5ga** in 81% yield (45.7 mg) as a yellow solid.  $R_f = 0.5$  (PE:EA = 5:1), m.p. 75–76 °C.

$^1\text{H}$  NMR (600 MHz,  $\text{CDCl}_3$ )  $\delta$  7.87 (d,  $J = 8.1$  Hz, 1H), 7.35 – 7.31 (m, 1H), 7.27 – 7.24 (m, 1H), 7.22 – 7.16 (m, 3H), 7.14 – 7.09 (m, 2H), 7.06 (t,  $J = 7.6$  Hz, 1H), 6.95 (d,  $J = 7.5$  Hz, 1H), 6.74 (d,  $J = 7.6$  Hz, 1H), 6.66 (s, 1H), 4.70 (ddd,  $J = 48.2, 14.6, 6.9$  Hz, 2H), 4.07 (d,  $J = 14.0$  Hz, 1H), 3.97 (t,  $J = 6.5$  Hz, 1H), 3.76 (d,  $J = 14.0$  Hz, 1H), 2.35 (s, 3H),

2.23 (s, 3H), 1.64 (s, 9H), 1.00 (s, 9H).

$^{13}\text{C}$  NMR (151 MHz,  $\text{CDCl}_3$ )  $\delta$  175.3, 154.3, 149.6, 146.3, 140.5, 138.8, 138.7, 138.1, 137.5, 132.9, 128.7, 128.6, 128.4, 128.4, 128.3, 127.9, 127.9, 127.3, 124.9, 124.6, 124.3, 123.6, 115.2, 84.2, 65.6, 55.8, 49.0, 34.4, 29.2, 28.1, 21.4, 21.3.

HRMS (ESI-TOF) calcd for  $\text{C}_{36}\text{H}_{42}\text{N}_3\text{O}_3^+$  ( $[\text{M}+\text{H}^+]$ ) = 564.3221, Found 564.3284.

**Tert-butyl-2-(tert-butyl)-3-((3-methoxybenzyl)amino)-4-((3-methoxybenzyl)imino)-2'-oxospiro [cyclobutane-1,3'-indolin]-2-ene-1'-carboxylate **5ha****

The reaction was run at rt for 14 h, affording product **5ha** in 71% yield (44.7 mg) as a yellow solid.

$R_f = 0.5$  (PE:EA = 5:1), m.p. 78–79 °C.

$^1\text{H}$  NMR (400 MHz,  $\text{CDCl}_3$ )  $\delta$  7.87 (d,  $J = 8.1$  Hz, 1H), 7.32 (td,  $J = 7.8, 1.5$  Hz, 1H), 7.29 – 7.23 (m, 1H), 7.21 (dd,  $J = 7.5, 1.4$  Hz, 1H), 7.12 (td,  $J = 7.4, 1.0$  Hz, 1H), 7.07 (t,  $J = 8.1$  Hz, 1H), 7.00 – 6.92

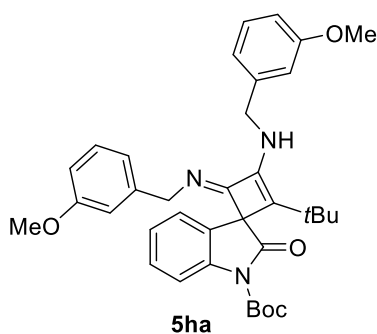

(m, 2H), 6.85 – 6.79 (m, 1H), 6.72 – 6.66 (m, 1H), 6.54 – 6.47 (m, 2H), 4.81 – 4.66 (m, 2H), 4.08 – 3.98 (m, 2H), 3.81 (s, 1H), 3.78 (s, 3H), 3.69 (s, 3H), 1.63 (s, 9H), 1.00 (s, 9H).

$^{13}\text{C}$  NMR (101 MHz,  $\text{CDCl}_3$ )  $\delta$  175.3, 159.9, 159.5, 154.7, 149.6, 146.2, 142.4, 140.6, 138.8, 133.1, 129.6, 129.0, 128.8, 128.3, 124.4, 123.6, 120.1, 119.7, 115.3, 113.2, 112.9, 112.7, 112.6, 84.3, 65.6, 55.7,

55.2, 55.1, 49.0, 34.5, 29.2, 28.1.

HRMS (ESI-TOF) calcd for  $\text{C}_{36}\text{H}_{42}\text{N}_3\text{O}_5^+$  ( $[\text{M}+\text{H}^+]$ ) = 596.3119, Found 596.3118.

**Tert-butyl-2-(tert-butyl)-3-((4-fluorobenzyl)amino)-4-((4-fluorobenzyl)imino)-2'-oxospiro[cyclobutane-1,3'-indolin]-2-ene-1'-carboxylate **5ia****

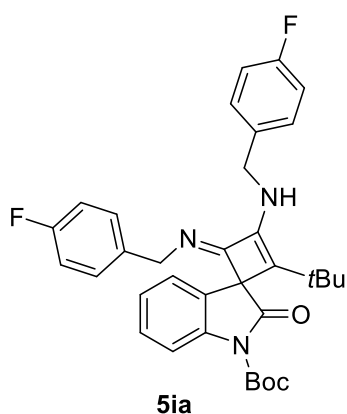

The reaction was run at rt for 14 h, affording product **5ia** in 80% yield (45.8 mg) as a yellow solid.  $R_f$  = 0.3 (PE:EA = 5:1), m.p. 84–85 °C.

$^1\text{H}$  NMR (600 MHz,  $\text{CDCl}_3$ )  $\delta$  7.86 (d,  $J$  = 8.1 Hz, 1H), 7.37 – 7.30 (m, 3H), 7.17 – 7.09 (m, 2H), 7.03 (t,  $J$  = 8.7 Hz, 2H), 6.84 (d,  $J$  = 7.1 Hz, 4H), 4.69 (d,  $J$  = 6.6 Hz, 2H), 4.00 (dd,  $J$  = 14.2, 1.0 Hz, 1H), 3.98 (d,  $J$  = 6.6 Hz, 1H), 3.77 (d,  $J$  = 13.9 Hz, 1H), 1.63 (s, 9H), 0.99 (s, 9H).

$^{13}\text{C}$  NMR (151 MHz,  $\text{CDCl}_3$ )  $\delta$  175.2, 162.7 (d,  $J$  = 55.8 Hz, 1C), 161.1 (d,  $J$  = 54.4 Hz, 1C), 154.7, 149.5, 145.9, 138.7, 136.3, 136.3, 134.6,

134.6, 133.5, 129.2, 129.2, 129.2, 129.1, 128.9, 128.0, 124.4, 123.5, 115.4, 115.3, 114.8, 114.7, 84.3, 65.5, 54.9, 48.2, 34.5, 29.1, 28.1.

$^{19}\text{F}$  NMR (565 MHz,  $\text{CDCl}_3$ )  $\delta$  -115.56, -116.49.

HRMS (ESI-TOF) calcd for  $\text{C}_{34}\text{H}_{36}\text{F}_2\text{N}_3\text{O}_3^+$  ( $[\text{M}+\text{H}^+]$ ) = 572.2720, Found 572.2719.

**Tert-butyl-2-(tert-butyl)-3-((4-chlorobenzyl)amino)-4-((4-chlorobenzyl)imino)-2'-oxospiro[cyclobutane-1,3'-indolin]-2-ene-1'-carboxylate **5ja****

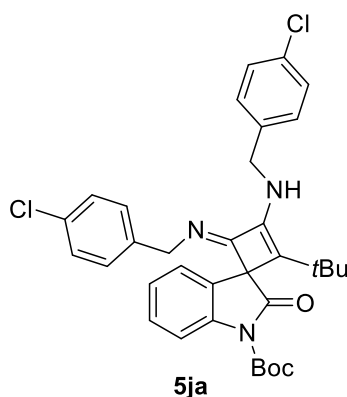

The reaction was run at rt for 14 h, affording product **5ja** in 85% yield (43.7 mg) as a yellow solid.  $R_f$  = 0.4 (PE:EA = 5:1), m.p. 88–91 °C.

$^1\text{H}$  NMR (600 MHz,  $\text{CDCl}_3$ )  $\delta$  7.86 (d,  $J$  = 8.1 Hz, 1H), 7.36 – 7.28 (m, 5H), 7.15 – 7.08 (m, 4H), 6.79 (d,  $J$  = 8.4 Hz, 2H), 4.70 (d,  $J$  = 6.6 Hz, 2H), 4.04 – 4.01 (m, 1H), 3.99 (d,  $J$  = 14.5 Hz, 1H), 3.75 (d,  $J$  = 14.3 Hz, 1H), 1.63 (s, 9H), 0.99 (s, 9H).



$^{13}\text{C}$  NMR (151 MHz,  $\text{CDCl}_3$ )  $\delta$  175.1, 154.8, 149.4, 145.7, 139.1, 138.7, 137.3, 133.5, 132.9, 132.3, 129.0, 128.9, 128.8, 128.7, 128.1, 127.9, 124.5, 123.5, 115.3, 84.4, 65.5, 54.9, 48.1, 34.5, 29.1, 28.1.  
HRMS (ESI-TOF) calcd for  $\text{C}_{34}\text{H}_{36}\text{Cl}_2\text{N}_3\text{O}_3^+$  ( $[\text{M}+\text{H}^+]$ ) = 604.2129, Found 604.2130.

**Tert-butyl-3-((4-bromobenzyl)amino)-4-((4-bromobenzyl)imino)-2-(tert-butyl)-2'-oxospiro [cyclobutane-1,3'-indolin]-2-ene-1'-carboxylate 5ka**

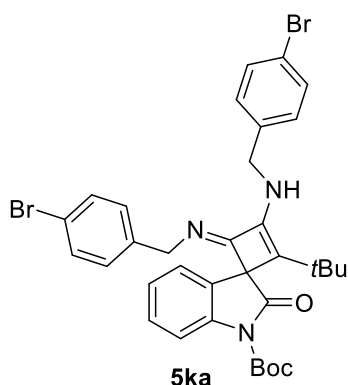

The reaction was run at rt for 14 h, affording product **5ka** in 76% yield (52.7 mg) as a yellow solid.  $R_f$  = 0.4 (PE:EA = 5:1), m.p. 92–93 °C.

$^1\text{H}$  NMR (600 MHz,  $\text{CDCl}_3$ )  $\delta$  7.86 (d,  $J$  = 8.1 Hz, 1H), 7.47 (d,  $J$  = 8.3 Hz, 2H), 7.35 – 7.31 (m, 1H), 7.28 – 7.23 (m, 4H), 7.15 – 7.08 (m, 2H), 6.73 (d,  $J$  = 8.2 Hz, 2H), 4.68 (d,  $J$  = 6.6 Hz, 2H), 4.02 (t,  $J$  = 6.7 Hz, 1H), 3.97 (d,  $J$  = 14.3 Hz, 1H), 3.73 (d,  $J$  = 14.3 Hz, 1H), 1.63 (s, 9H), 0.99 (s, 9H).

$^{13}\text{C}$  NMR (101 MHz,  $\text{CDCl}_3$ )  $\delta$  175.0, 154.8, 149.4, 145.7, 139.6, 138.7, 137.9, 133.5, 131.6, 131.0, 129.3, 129.2, 128.9, 127.9, 124.5, 123.5, 121.0, 120.4, 115.3, 84.4, 65.5, 54.9, 48.2, 34.5, 29.1, 28.1.  
HRMS (ESI-TOF) calcd for  $\text{C}_{34}\text{H}_{36}\text{Br}_2\text{N}_3\text{O}_3^+$  ( $[\text{M}+\text{H}^+]$ ) = 694.1098, Found 694.1104.

**Tert-butyl-2-(tert-butyl)-3-((4-methylbenzyl)amino)-4-((4-methylbenzyl)imino)-2'-oxospiro [cyclobutane-1,3'-indolin]-2-ene-1'-carboxylate 5la**

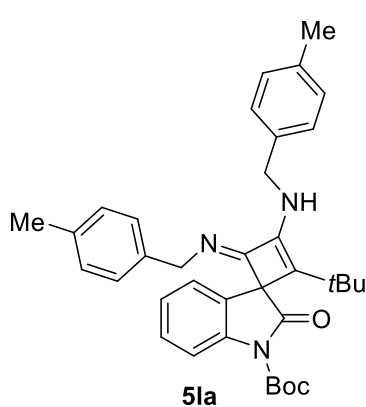

The reaction was run at rt for 14 h, affording product **5la** in 87% yield (48.9 mg) as a yellow solid.  $R_f$  = 0.5 (PE:EA = 5:1), m.p. 82–84 °C.

$^1\text{H}$  NMR (400 MHz,  $\text{CDCl}_3$ )  $\delta$  7.87 (d,  $J$  = 8.1 Hz, 1H), 7.36 – 7.30 (m, 1H), 7.30 – 7.26 (m, 2H), 7.22 – 7.10 (m, 4H), 6.98 (d,  $J$  = 7.8 Hz, 2H), 6.82 (d,  $J$  = 7.9 Hz, 2H), 4.78 – 4.61 (m, 2H), 4.03 (d,  $J$  = 14.1 Hz, 1H), 3.94 (t,  $J$  = 6.4 Hz, 1H), 3.78 (d,  $J$  = 14.1 Hz, 1H), 2.37 (s, 3H), 2.27 (s, 3H), 1.64 (s, 9H), 1.00 (s, 9H).

$^{13}\text{C}$  NMR (101 MHz,  $\text{CDCl}_3$ )  $\delta$  175.4, 154.3, 149.6, 146.3, 138.8, 137.6, 136.8, 136.1, 136.0, 132.6, 129.2, 128.8, 128.7, 128.4, 127.8, 127.7, 124.4, 123.6, 115.2, 84.2, 65.7, 55.5, 48.9, 34.5, 29.3, 28.1, 21.2, 21.1.

HRMS (ESI-TOF) calcd for  $\text{C}_{36}\text{H}_{42}\text{N}_3\text{O}_3^+$  ( $[\text{M}+\text{H}^+]$ ) = 564.3221, Found 564.3224.

**Tert-butyl-2-(tert-butyl)-3-((4-methoxybenzyl)amino)-4-((4-methoxybenzyl)imino)-2'-oxospiro [cyclobutane-1,3'-indolin]-2-ene-1'-carboxylate 5ma**

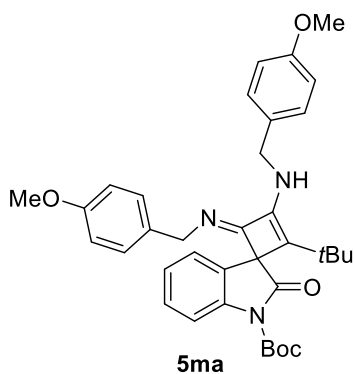

The reaction was run at rt for 14 h, affording product **5ma** in 85% yield (50.6 mg) as a yellow solid.  $R_f = 0.5$  (PE:EA = 5:1), m.p. 99–100 °C.

$^1\text{H NMR}$  (600 MHz,  $\text{CDCl}_3$ )  $\delta$  7.80 (d,  $J = 8.1$  Hz, 1H), 7.31 – 7.26 (m, 2H), 7.24 (td,  $J = 7.8, 1.4$  Hz, 1H), 7.13 (td,  $J = 7.7, 1.7$  Hz, 1H), 7.03 – 6.97 (m, 2H), 6.92 – 6.87 (m, 3H), 6.82 (td,  $J = 7.4, 1.1$  Hz, 1H), 6.71 (dd,  $J = 8.2, 1.1$  Hz, 1H), 4.72 (dd,  $J = 14.4, 7.9$  Hz, 1H), 4.59 (dd,  $J = 14.3, 5.7$  Hz, 1H), 4.46 – 4.41 (m, 1H), 4.07 (d,  $J = 15.0$  Hz, 1H), 3.87

(s, 3H), 3.85 (d,  $J = 15.0$  Hz, 1H), 3.67 (s, 3H), 1.60 (s, 9H), 0.94 (s, 9H).

$^{13}\text{C NMR}$  (151 MHz,  $\text{CDCl}_3$ )  $\delta$  175.0, 157.5, 156.7, 154.6, 149.6, 147.0, 138.7, 134.1, 130.0, 129.0, 128.5, 128.4, 128.4, 128.3, 127.7, 127.5, 124.1, 123.4, 120.5, 120.2, 115.0, 110.0, 109.9, 83.9, 65.5, 55.2, 49.8, 45.2, 34.3, 29.1, 28.1.

HRMS (ESI-TOF) calcd for  $\text{C}_{36}\text{H}_{42}\text{N}_3\text{O}_5^+$  ( $[\text{M}+\text{H}^+]$ ) = 596.3119, Found 596.3117.

**Tert-butyl-2-(tert-butyl)-3-((cyclohexylmethyl)amino)-4-((cyclohexylmethyl)imino)-2'-oxospiro[cyclobutane-1,3'-indolin]-2-ene-1'-carboxylate 5na**

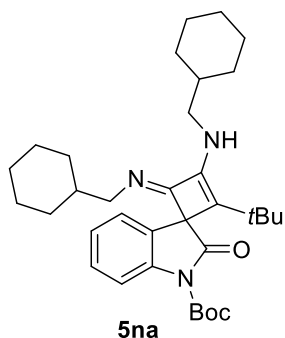

The reaction was run at rt for 14 h, affording product **5na** in 79% yield (43.9 mg) as a yellow solid.  $R_f = 0.5$  (PE:EA = 5:1), m.p. 138–140 °C.

$^1\text{H NMR}$  (600 MHz,  $\text{CDCl}_3$ )  $\delta$  7.88 – 7.75 (m, 1H), 7.32 – 7.22 (m, 1H), 7.22 – 7.15 (m, 1H), 7.13 – 7.07 (m, 1H), 3.80 – 3.70 (m, 1H), 3.35 – 3.27 (m, 2H), 2.58 – 2.46 (m, 2H), 1.83 – 1.70 (m, 5H), 1.69 – 1.60 (m, 9H), 1.56 – 1.49 (m, 3H), 1.48 – 1.36 (m, 3H), 1.29 – 1.21 (m, 3H), 1.19 – 1.05 (m,

4H), 1.01 – 0.92 (m, 10H), 0.64 (dq,  $J = 78.0, 12.2$  Hz, 3H).

$^{13}\text{C NMR}$  (151 MHz,  $\text{CDCl}_3$ )  $\delta$  175.5, 153.4, 149.7, 146.6, 138.6, 129.8, 129.0, 128.3, 124.1, 123.4, 114.9, 83.8, 65.7, 58.3, 53.4, 51.0, 39.6, 39.1, 34.2, 31.1, 31.0, 30.5, 29.2, 28.1, 26.6, 26.5, 26.0, 26.0, 25.9, 25.9.

HRMS (ESI-TOF) calcd for  $\text{C}_{34}\text{H}_{50}\text{N}_3\text{O}_3^+$  ( $[\text{M}+\text{H}^+]$ ) = 548.3847, Found 548.3847.

**Tert-butyl-2-(tert-butyl)-2'-oxo-3-(phenethylamino)-4-(phenethylimino)spiro[cyclobutane-1,3'-indolin]-2-ene-1'-carboxylate 5oa**

The reaction was run at rt for 14 h, affording product **5oa** in 66% yield (37.2 mg) as a yellow solid.  $R_f = 0.5$  (PE:EA = 5:1), m.p. 121–123 °C.

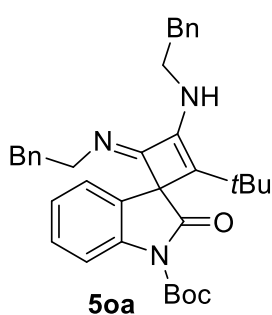

$^1\text{H}$  NMR (600 MHz,  $\text{CDCl}_3$ )  $\delta$  7.83 (d,  $J = 8.2$  Hz, 1H), 7.35 – 7.31 (m, 3H), 7.29 (d,  $J = 7.0$  Hz, 2H), 7.26 – 7.22 (m, 1H), 7.17 (t,  $J = 7.0$  Hz, 2H), 7.15 – 7.10 (m, 3H), 6.84 (d,  $J = 7.2$  Hz, 2H), 3.83 – 3.76 (m, 1H), 3.75 – 3.69 (m, 2H), 3.14 – 3.08 (m, 1H), 2.93 – 2.89 (m, 2H), 2.88 – 2.85 (m, 1H), 2.70 – 2.63 (m, 1H), 2.46 (ddd,  $J = 16.3, 10.1, 6.3$  Hz, 1H), 1.64 (s, 9H), 0.92 (s, 9H).

$^{13}\text{C}$  NMR (151 MHz,  $\text{CDCl}_3$ )  $\delta$  175.5, 154.3, 149.4, 146.0, 139.8, 139.3, 138.7, 132.3, 129.2, 128.8, 128.6, 128.5, 128.5, 128.1, 126.3, 125.8, 124.4, 123.5, 115.2, 84.1, 65.3, 54.1, 45.8, 37.7, 36.9, 34.4, 29.0, 28.1.

HRMS (ESI-TOF) calcd for  $\text{C}_{36}\text{H}_{42}\text{N}_3\text{O}_3^+$  ( $[\text{M}+\text{H}^+]$ ) = 564.3221, Found 564.3223.

**Tert-butyl-2-(tert-butyl)-3-(butylamino)-4-(butylimino)-2'-oxospiro[cyclobutane-1,3'-indolin]-2-ene-1'-carboxylate 5pa**

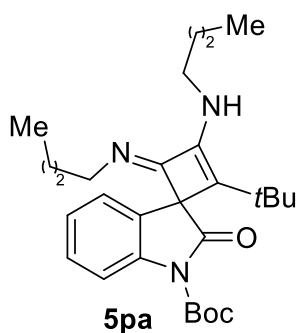

The reaction was run at rt for 14 h, affording product **5pa** in 84% yield (39.3 mg) as a yellow solid.  $R_f = 0.6$  (PE:EA = 5:1), m.p. 108–109 °C.

$^1\text{H}$  NMR (600 MHz,  $\text{CDCl}_3$ )  $\delta$  7.82 (d,  $J = 8.1$  Hz, 1H), 7.30 – 7.26 (m, 1H), 7.22 (dd,  $J = 7.5, 1.4$  Hz, 1H), 7.14 – 7.10 (m, 1H), 3.63 (t,  $J = 6.3$  Hz, 1H), 3.51 – 3.44 (m, 2H), 2.78 – 2.71 (m, 1H), 2.68 – 2.62 (m, 1H), 1.63 (s, 9H), 1.60 – 1.43 (m, 3H), 1.39 (h,  $J = 7.4$  Hz, 2H), 1.35 – 1.06 (m, 4H),

1.06 – 1.00 (m, 3H), 0.98 (s, 9H), 0.94 (t,  $J = 7.4$  Hz, 3H), 0.67 (t,  $J = 7.4$  Hz, 3H).

$^{13}\text{C}$  NMR (101 MHz,  $\text{CDCl}_3$ )  $\delta$  175.5, 153.7, 149.7, 146.6, 138.7, 130.9, 128.9, 128.4, 124.2, 123.4, 115.0, 83.9, 65.6, 51.6, 44.7, 34.2, 33.6, 32.4, 29.3, 28.1, 20.3, 19.8, 13.8, 13.6.

HRMS (ESI-TOF) calcd for  $\text{C}_{28}\text{H}_{42}\text{N}_3\text{O}_3^+$  ( $[\text{M}+\text{H}^+]$ ) = 468.3221, Found 468.3212.

**Tert-butyl-2-(tert-butyl)-2'-oxo-3-(pentylamino)-4-(pentylimino)spiro[cyclobutane-1,3'-indolin]-2-ene-1'-carboxylate 5qa**

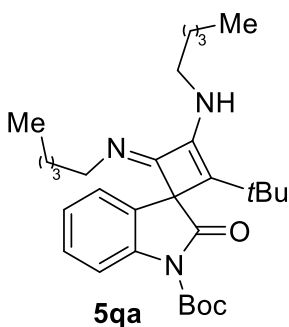

The reaction was run at rt for 14 h, affording product **5qa** in 73% yield (36.2 mg) as a yellow solid.  $R_f = 0.6$  (PE:EA = 5:1), m.p. 111–113 °C.

$^1\text{H}$  NMR (600 MHz,  $\text{CDCl}_3$ )  $\delta$  7.82 (d,  $J = 8.1$  Hz, 1H), 7.28 (td,  $J = 7.8, 1.4$  Hz, 1H), 7.22 (dd,  $J = 7.5, 1.4$  Hz, 1H), 7.11 (td,  $J = 7.5, 1.0$  Hz, 1H), 3.64 (t,  $J = 6.5$  Hz, 1H), 3.46 (q,  $J = 6.8$  Hz, 2H), 2.76 (ddd,  $J = 11.9, 7.6, 6.7$  Hz, 1H), 2.66 – 2.60 (m, 1H), 1.63 (s, 9H), 1.60 – 1.52 (m, 2H), 1.43 –

1.15 (m, 8H), 1.13 – 1.00 (m, 4H), 0.99 (s, 9H), 0.98 – 0.94 (m, 2H), 0.93 – 0.89 (m, 3H), 0.75 (t,  $J = 7.3$  Hz, 3H).

$^{13}\text{C}$  NMR (101 MHz,  $\text{CDCl}_3$ )  $\delta$  175.4, 153.7, 149.7, 146.6, 138.7, 130.9, 128.9, 128.4, 124.1, 123.4, 115.0, 83.9, 65.6, 52.0, 45.0, 34.2, 31.2, 30.0, 29.5, 29.3, 28.8, 28.1, 22.4, 22.2, 14.0, 13.9.

HRMS (ESI–TOF) calcd for  $\text{C}_{30}\text{H}_{46}\text{N}_3\text{O}_3^+$  ( $[\text{M}+\text{H}^+]$ ) = 496.3534, Found 496.3527.

**Tert-butyl-2-(tert-butyl)-3-(hexylamino)-4-(hexylimino)-2'-oxospiro[cyclobutane-1,3'-indolin]-2-ene-1'-carboxylate **5ra****

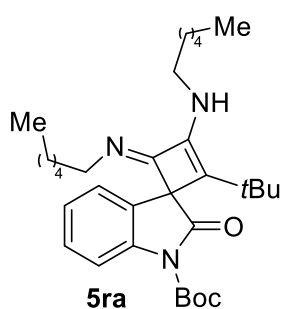

The reaction was run at rt for 14 h, affording product **5ra** in 72% yield (37.8 mg) as a yellow solid.  $R_f = 0.6$  (PE:EA = 5:1), m.p. 117–118 °C.

$^1\text{H}$  NMR (600 MHz,  $\text{CDCl}_3$ )  $\delta$  7.82 (d,  $J = 8.1$  Hz, 1H), 7.30 – 7.27 (m, 1H), 7.24 – 7.21 (m, 1H), 7.11 (td,  $J = 7.5, 1.0$  Hz, 1H), 3.67 – 3.61 (m, 1H), 3.49 – 3.43 (m, 2H), 2.80 – 2.74 (m, 1H), 2.67 – 2.59 (m, 1H), 1.63 (s, 9H), 1.59 – 1.52 (m, 2H), 1.46 – 1.23 (m, 10H), 1.21 – 1.11 (m, 4H), 1.07 – 0.99 (m,

4H), 0.99 (s, 9H), 0.89 (t,  $J = 6.8$  Hz, 3H), 0.79 (t,  $J = 7.3$  Hz, 3H).

$^{13}\text{C}$  NMR (101 MHz,  $\text{CDCl}_3$ )  $\delta$  175.5, 153.7, 149.7, 146.6, 138.7, 131.0, 128.9, 128.4, 124.1, 123.4, 115.0, 83.9, 65.6, 52.0, 45.1, 34.3, 31.6, 31.5, 31.4, 30.3, 29.3, 28.1, 26.9, 26.3, 22.6, 22.5, 14.0, 13.9.

HRMS (ESI–TOF) calcd for  $\text{C}_{32}\text{H}_{50}\text{N}_3\text{O}_3^+$  ( $[\text{M}+\text{H}^+]$ ) = 524.3847, Found 524.3842.

**Tert-butyl-2-(tert-butyl)-3-((furan-2-ylmethyl)amino)-4-((furan-2-ylmethyl)imino)-2'-oxospiro[cyclobutane-1,3'-indolin]-2-ene-1'-carboxylate **5sa****

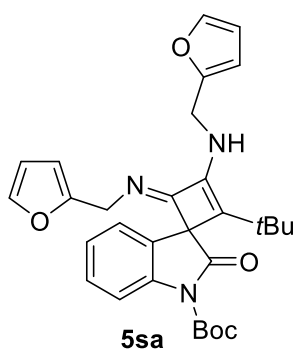

The reaction was run at rt for 14 h, affording product **5sa** in 51% yield (26.3 mg) as a yellow solid.  $R_f = 0.3$  (PE:EA = 4:1), m.p. 68–69 °C.

$^1\text{H}$  NMR (600 MHz,  $\text{CDCl}_3$ )  $\delta$  7.84 (d,  $J = 8.1$  Hz, 1H), 7.39 – 7.37 (m, 1H), 7.32 (td,  $J = 7.9, 1.5$  Hz, 1H), 7.24 – 7.21 (m, 1H), 7.18 (dd,  $J = 7.5, 1.4$  Hz, 1H), 7.14 (td,  $J = 7.4, 1.0$  Hz, 1H), 6.34 (dd,  $J = 3.2, 1.8$  Hz, 1H), 6.25 – 6.22 (m, 1H), 6.19 (dd,  $J = 3.2, 1.8$  Hz, 1H), 5.82 – 5.78 (m, 1H), 4.77 (dd,  $J = 15.4, 7.4$  Hz, 1H), 4.56 (dd,  $J = 15.5, 5.6$  Hz, 1H), 4.02 (t,  $J =$

7.7 Hz, 1H), 4.00 (s, 1H), 3.79 (d,  $J = 14.8$  Hz, 1H), 1.64 (s, 9H), 0.98 (s, 9H).

$^{13}\text{C}$  NMR (101 MHz,  $\text{CDCl}_3$ )  $\delta$  174.8, 155.6, 153.6, 152.2, 149.5, 145.9, 141.9, 141.5, 138.7, 135.1, 128.9, 127.8, 124.4, 123.7, 115.2, 110.3, 110.1, 107.0, 106.6, 84.3, 65.4, 48.5, 42.0, 34.5, 29.1, 28.1.

HRMS (ESI–TOF) calcd for  $\text{C}_{30}\text{H}_{34}\text{N}_3\text{O}_5^+$  ( $[\text{M}+\text{H}^+]$ ) = 516.2493, Found 516.2491.

**Tert-butyl-3-(((1H-indol-4-yl)methyl)amino)-4-(((1H-indol-4-yl)methyl)imino)-2-(tert-butyl)-2'-oxospiro[cyclobutane-1,3'-indolin]-2-ene-1'-carboxylate **5ta****

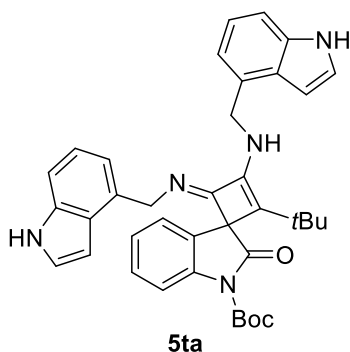

The reaction was run at rt for 14 h, affording product **5ta** in 73% yield (44.8 mg) as a yellow solid.  $R_f = 0.4$  (PE:EA = 2:1), m.p. 99–100 °C.

$^1\text{H NMR}$  (400 MHz,  $\text{CDCl}_3$ )  $\delta$  8.42 (s, 1H), 8.16 (s, 1H), 7.87 (d,  $J = 8.1$  Hz, 1H), 7.37 – 7.28 (m, 2H), 7.26 – 7.24 (m, 1H), 7.20 – 7.06 (m, 5H), 7.02 – 6.99 (m, 1H), 6.99 – 6.94 (m, 1H), 6.70 – 6.61 (m, 2H), 6.37 – 6.33 (m, 1H), 5.09 – 4.96 (m, 2H), 4.41 (d,  $J = 14.6$  Hz, 1H), 4.13 (d,  $J = 14.7$  Hz, 1H), 4.04 (t,  $J = 6.0$  Hz, 1H), 1.65 (s, 9H), 0.98 (s,

9H).

$^{13}\text{C NMR}$  (101 MHz,  $\text{CDCl}_3$ )  $\delta$  175.9, 154.3, 149.6, 146.7, 138.8, 136.0, 135.7, 131.9, 131.9, 131.0, 128.7, 128.7, 126.6, 126.6, 124.5, 124.4, 123.8, 123.7, 121.8, 121.8, 118.8, 118.7, 115.2, 110.5, 109.8, 101.1, 100.9, 84.3, 65.9, 53.8, 53.5, 47.7, 34.5, 29.3, 28.2.

HRMS (ESI–TOF) calcd for  $\text{C}_{38}\text{H}_{40}\text{N}_5\text{O}_3^+$  ( $[\text{M}+\text{H}^+]$ ) = 614.3126, Found 614.3129.

**Tert-butyl-3-((2-(1H-indol-4-yl)ethyl)amino)-4-((2-(1H-indol-4-yl)ethyl)imino)-2-(tert-butyl)-2'-oxospiro[cyclobutane-1,3'-indolin]-2-ene-1'-carboxylate **5ua****

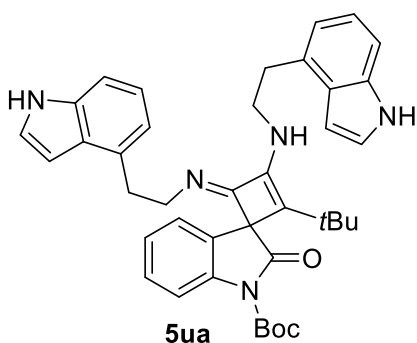

The reaction was run at rt for 14 h, affording product **5ua** in 84% yield (55.2 mg) as a yellow solid.  $R_f = 0.4$  (PE:EA = 2:1), m.p. 98–99 °C.

$^1\text{H NMR}$  (400 MHz,  $\text{CDCl}_3$ )  $\delta$  8.49 (s, 1H), 8.25 (s, 1H), 7.83 (d,  $J = 8.1$  Hz, 1H), 7.35 – 7.28 (m, 2H), 7.25 – 7.11 (m, 5H), 7.07 – 7.03 (m, 2H), 7.03 – 6.97 (m, 1H), 6.75 – 6.71 (m, 1H), 6.56 (d,  $J =$

7.7 Hz, 1H), 6.31 – 6.25 (m, 1H), 3.98 – 3.90 (m, 2H), 3.78 (t,  $J = 6.6$  Hz, 1H), 3.28 (td,  $J = 10.9, 4.8$  Hz, 1H), 3.22 (t,  $J = 6.5$  Hz, 2H), 3.15 – 2.97 (m, 2H), 2.87 – 2.77 (m, 1H), 1.63 (s, 9H), 0.88 (s, 9H).

$^{13}\text{C NMR}$  (101 MHz,  $\text{CDCl}_3$ )  $\delta$  176.0, 154.2, 149.5, 146.3, 138.7, 136.0, 135.6, 132.2, 131.9, 131.3, 128.7, 128.6, 127.6, 127.4, 124.4, 124.1, 123.7, 123.6, 122.0, 121.9, 120.2, 119.5, 115.3, 109.6, 109.1, 101.1, 100.9, 84.2, 65.4, 53.5, 45.2, 35.4, 34.6, 34.5, 29.1, 28.2.

HRMS (ESI–TOF) calcd for  $\text{C}_{40}\text{H}_{44}\text{N}_5\text{O}_3^+$  ( $[\text{M}+\text{H}^+]$ ) = 642.3439, Found 642.3442.

## 7. General procedure and spectral data of products 6

A dry reaction tube was charged with isocyanide **1** (0.2 mmol, 2 equiv.) Y(OTf)<sub>3</sub> (10 mol%) and alkylidene malonates **2** (0.1 mmol, 1 equiv.), Et<sub>2</sub>O (0.5 mL) was added. The reaction mixture continued stirring at rt for 14 h. The residue was directly purified by flash chromatography on silica gel using petroleum ether/ethyl acetate = 10/1 as eluent to afford the desired products **3**. Then **3** was smoothly transformed through a second silica gel column chromatography by using petroleum ether/ethyl acetate = 8/1 as the eluent, thus affording the desired products **6**.

### Methyl 2,5-dioxo-1-phenethyl-4-(N-phenethylbenzamido)-2,5-dihydro-1H-pyrrole-3-carboxylate **6a**

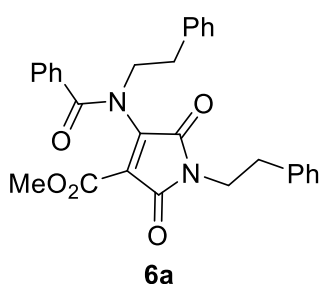

The reaction was run at rt, affording product **6a** in 40% yield (19.3 mg) as a yellow solid.  $R_f = 0.2$  (PE:EA = 2:1), m.p. 109–110°C.

<sup>1</sup>H NMR (400 MHz, CDCl<sub>3</sub>)  $\delta$  7.47 – 7.40 (m, 3H), 7.34 – 7.26 (m, 4H), 7.25 – 7.11 (m, 8H), 4.33 (t,  $J = 7.1$  Hz, 2H), 3.73 (s, 3H), 3.63 (t,  $J = 7.3$  Hz, 2H), 3.05 (t,  $J = 7.1$  Hz, 2H), 2.76 (t,  $J = 7.5$  Hz, 2H).

<sup>13</sup>C NMR (101 MHz, CDCl<sub>3</sub>)  $\delta$  171.3, 165.2, 165.0, 160.2, 149.2, 138.1, 137.4, 134.3, 132.0, 129.4, 128.7, 128.6, 128.6, 128.4, 128.3, 126.9, 126.8, 114.7, 52.3, 51.2, 39.4, 35.5, 34.1.

HRMS (ESI–TOF) calcd for C<sub>29</sub>H<sub>27</sub>N<sub>2</sub>O<sub>5</sub><sup>+</sup> ([M+H<sup>+</sup>]) = 483.1915, Found 483.1965.

### Methyl 4-(4-methyl-N-phenethylbenzamido)-2,5-dioxo-1-phenethyl-2,5-dihydro-1H-pyrrole-3-carboxylate **6b**

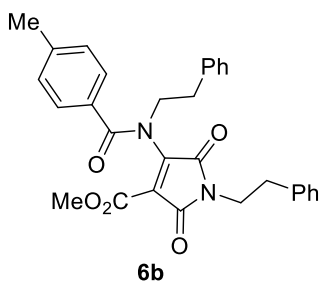

The reaction was run at rt, affording product **6b** in 54% yield (26.8 mg) as a yellow solid.  $R_f = 0.2$  (PE:EA = 2:1), m.p. 112–114 °C.

<sup>1</sup>H NMR (600 MHz, CDCl<sub>3</sub>)  $\delta$  7.34 – 7.28 (m, 4H), 7.24 – 7.17 (m, 5H), 7.17 – 7.13 (m, 3H), 7.11 (d,  $J = 7.9$  Hz, 2H), 4.32 (t,  $J = 7.1$  Hz, 2H), 3.72 (s, 3H), 3.63 (t,  $J = 7.2$  Hz, 2H), 3.05 (t,  $J = 7.1$  Hz, 2H), 2.77 (t,  $J = 7.5$  Hz, 2H), 2.34 (s, 3H).

<sup>13</sup>C NMR (151 MHz, CDCl<sub>3</sub>)  $\delta$  171.4, 165.3, 165.1, 160.2, 149.4, 142.8, 138.1, 137.5, 131.4, 129.4, 129.1, 128.7, 128.7, 128.6, 128.4, 126.8, 126.8, 114.2, 52.3, 51.1, 39.4, 35.6, 34.2, 21.5.

HRMS (ESI–TOF) calcd for C<sub>30</sub>H<sub>29</sub>N<sub>2</sub>O<sub>5</sub><sup>+</sup> ([M+H<sup>+</sup>]) = 497.2071, Found 497.2073.

### Methyl 1-butyl-4-(N-butylbenzamido)-2,5-dioxo-2,5-dihydro-1H-pyrrole-3-carboxylate **6c**

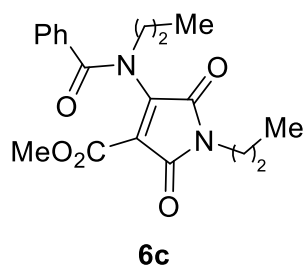

The reaction was run at rt, affording product **6c** in 41% yield (15.8 mg) as a yellow solid.  $R_f = 0.2$  (PE:EA = 2:1), m.p. 80–82 °C.

$^1\text{H NMR}$  (400 MHz,  $\text{CDCl}_3$ )  $\delta$  7.52 – 7.47 (m, 2H), 7.46 – 7.39 (m, 1H), 7.37 – 7.27 (m, 2H), 4.02 (t,  $J = 7.6$ , 2H), 3.81 (s, 3H), 3.46 (t,  $J = 7.0$  Hz, 2H), 1.76 – 1.57 (m, 3H), 1.52 – 1.26 (m, 6H), 1.20 – 1.03 (m, 3H), 0.92 (t,  $J = 7.4$  Hz, 3H), 0.85 (t,  $J = 7.3$  Hz, 3H).

$^{13}\text{C NMR}$  (101 MHz,  $\text{CDCl}_3$ )  $\delta$  171.0, 165.6, 165.6, 160.4, 149.3, 135.3, 131.8, 128.6, 128.4, 115.6, 52.5, 49.7, 38.2, 30.8, 30.1, 20.0, 19.6, 13.6, 13.4.

HRMS (ESI–TOF) calcd for  $\text{C}_{21}\text{H}_{27}\text{N}_2\text{O}_5^+$  ( $[\text{M}+\text{H}^+]$ ) = 387.1915, Found. 387.1916.

#### Methyl 2,5-dioxo-1-pentyl-4-(N-pentylbenzamido)-2,5-dihydro-1H-pyrrole-3-carboxylate **6d**

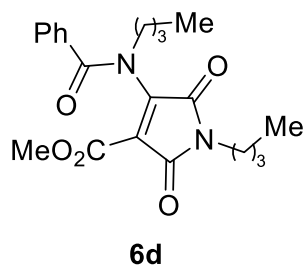

The reaction was run at rt, affording product **6d** in 49% yield (20.3 mg) as a yellow solid.  $R_f = 0.2$  (PE:EA = 2:1), m.p. 90–91 °C.

$^1\text{H NMR}$  (400 MHz,  $\text{CDCl}_3$ )  $\delta$  7.53 – 7.47 (m, 2H), 7.45 – 7.40 (m, 1H), 7.36 – 7.30 (m, 2H), 4.01 (t,  $J = 7.6$  Hz 2H), 3.80 (s, 3H), 3.45 (t,  $J = 7.1$  Hz, 2H), 1.76 – 1.64 (m, 2H), 1.50 – 1.40 (m, 2H), 1.36 – 1.27 (m, 7H), 1.25 – 1.20 (m, 1H), 1.14 – 1.05 (m, 2H), 0.90 – 0.83 (m, 6H).

$^{13}\text{C NMR}$  (101 MHz,  $\text{CDCl}_3$ )  $\delta$  171.0, 165.6, 165.6, 160.4, 149.3, 135.2, 131.9, 128.6, 128.4, 115.6, 52.5, 49.9, 38.5, 28.9, 28.5, 28.4, 27.7, 22.2, 22.1, 13.9, 13.8.

HRMS (ESI–TOF) calcd for  $\text{C}_{23}\text{H}_{31}\text{N}_2\text{O}_5^+$  ( $[\text{M}+\text{H}^+]$ ) = 415.2228, Found 415.2224.

#### Methyl 1-hexyl-4-(N-hexylbenzamido)-2,5-dioxo-2,5-dihydro-1H-pyrrole-3-carboxylate **6e**

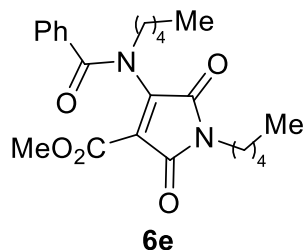

The reaction at rt, affording product **6e** in 50% yield (22.1 mg) as a yellow solid.  $R_f = 0.3$  (PE:EA = 2:1), m.p. 108–110 °C.

$^1\text{H NMR}$  (400 MHz,  $\text{CDCl}_3$ )  $\delta$  7.52 – 7.47 (m, 2H), 7.45 – 7.40 (m, 1H), 7.33 (t,  $J = 7.6$  Hz, 2H), 4.04 – 3.98 (m, 2H), 3.80 (s, 3H), 3.45 (t,  $J = 7.1$  Hz, 2H), 1.73 – 1.64 (m, 2H), 1.50 – 1.41 (m, 2H), 1.38 – 1.28 (m, 6H), 1.26 – 1.21 (m, 4H), 1.17 – 1.09 (m, 2H), 0.90 – 0.84 (m, 6H).

$^{13}\text{C NMR}$  (101 MHz,  $\text{CDCl}_3$ )  $\delta$  171.0, 165.6, 165.6, 160.4, 149.3, 135.2, 131.9, 128.6, 128.4, 115.6, 52.5, 49.9, 38.5, 31.3, 31.2, 28.7, 28.0, 26.4, 26.1, 22.5, 22.4, 13.9, 13.9.

HRMS (ESI–TOF) calcd for  $\text{C}_{25}\text{H}_{35}\text{N}_2\text{O}_5^+$  ( $[\text{M}+\text{H}^+]$ ) = 443.2541, Found 443.2537.

#### Methyl 4-(4-chloro-N-hexylbenzamido)-1-hexyl-2,5-dioxo-2,5-dihydro-1H-pyrrole-3-car

### boxylate **6f**

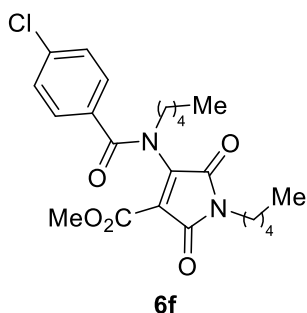

The reaction was run at rt, affording product **6f** in 35% yield (16.7 mg) as a yellow solid.  $R_f = 0.2$  (PE:EA = 2:1), m.p. 120–121 °C.

$^1\text{H NMR}$  (400 MHz,  $\text{CDCl}_3$ )  $\delta$  7.44 (d,  $J = 8.5$  Hz, 2H), 7.31 (d,  $J = 8.5$  Hz, 2H), 3.98 (t,  $J = 7.6$  Hz 2H), 3.82 (s, 3H), 3.46 (t,  $J = 7.0$  Hz, 2H), 1.71 – 1.63 (m, 2H), 1.50 – 1.41 (m, 3H), 1.37 (d,  $J = 3.6$  Hz, 1H), 1.34 – 1.27 (m, 8H), 1.17 – 1.08 (m, 3H), 0.89 – 0.85 (m, 6H).

$^{13}\text{C NMR}$  (101 MHz,  $\text{CDCl}_3$ )  $\delta$  170.0, 165.5, 165.4, 160.4, 149.1, 138.2, 133.8, 129.9, 128.8, 115.7, 52.6, 50.1, 38.6, 31.3, 31.1, 28.6, 28.0, 26.4, 26.1, 22.4, 22.4, 13.9, 13.9.

HRMS (ESI–TOF) calcd for  $\text{C}_{25}\text{H}_{34}\text{ClN}_2\text{O}_5^+$  ( $[\text{M}+\text{H}^+]$ ) = 477.2151, Found 477.2148.

### Methyl 1-hexyl-4-(N-hexyl-4-methoxybenzamido)-2,5-dioxo-2,5-dihydro-1H-pyrrole-3-carboxylate **6g**

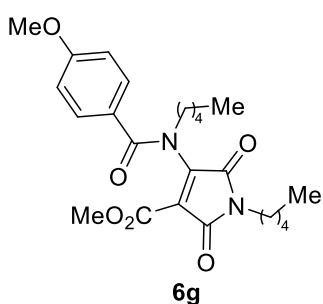

The reaction was run at rt, affording product **6g** in 52% yield (24.4 mg) as a yellow solid.  $R_f = 0.2$  (PE:EA = 2:1), m.p. 98–100 °C.

$^1\text{H NMR}$  (400 MHz,  $\text{CDCl}_3$ )  $\delta$  7.49 (dt,  $J = 8.8, 2.0$  Hz, 2H), 6.87 – 6.80 (m, 2H), 4.02 (t,  $J = 7.6$  Hz 2H), 3.82 (d,  $J = 4.0$  Hz, 6H), 3.48 (t,  $J = 7.1$  Hz, 2H), 1.75 – 1.67 (m, 2H), 1.53 – 1.44 (m, 3H), 1.41 – 1.38 (m, 1H), 1.31 (s, 7H), 1.26 – 1.21 (m, 3H), 1.20 – 1.12 (m, 2H), 0.92 – 0.85 (m,

6H).

$^{13}\text{C NMR}$  (101 MHz,  $\text{CDCl}_3$ )  $\delta$  170.8, 165.9, 165.7, 162.6, 160.5, 149.8, 130.7, 127.5, 113.8, 55.4, 52.4, 50.0, 38.5, 31.3, 31.2, 29.7, 28.7, 28.1, 26.4, 26.1, 22.5, 22.4, 13.9, 13.9.

HRMS (ESI–TOF) calcd for  $\text{C}_{26}\text{H}_{37}\text{N}_2\text{O}_6^+$  ( $[\text{M}+\text{H}^+]$ ) = 473.2647, Found 473.2642.

### Methyl 1-hexyl-4-(N-hexyl-4-methylbenzamido)-2,5-dioxo-2,5-dihydro-1H-pyrrole-3-carboxylate **6h**

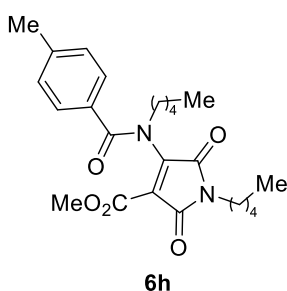

The reaction was run at rt, affording product **6h** in 55% yield (23.4 mg) as a yellow solid.  $R_f = 0.2$  (PE:EA = 2:1), m.p. 100–102 °C.

$^1\text{H NMR}$  (400 MHz,  $\text{CDCl}_3$ )  $\delta$  7.38 (d,  $J = 8.2$  Hz, 2H), 7.12 (d,  $J = 7.9$  Hz, 2H), 4.00 (t, 7.7 Hz, 2H), 3.79 (s, 3H), 3.46 (t,  $J = 7.1$  Hz, 2H), 2.34 (s, 3H), 1.72 – 1.64 (m, 2H), 1.50 – 1.41 (m, 3H), 1.35 – 1.28 (m, 6H), 1.25 – 1.20 (m, 3H), 1.17 – 1.10 (m, 2H), 0.89 – 0.85 (m, 6H).



$^{13}\text{C}$  NMR (101 MHz,  $\text{CDCl}_3$ )  $\delta$  171.1, 165.7, 160.4, 149.5, 142.6, 132.4, 129.1, 128.6, 115.0, 52.4, 49.9, 38.5, 31.3, 31.2, 28.7, 28.1, 26.4, 26.1, 22.5, 22.4, 21.5, 13.9, 13.9.

HRMS (ESI-TOF) calcd for  $\text{C}_{26}\text{H}_{37}\text{N}_2\text{O}_5^+$  ( $[\text{M}+\text{H}^+]$ ) = 457.2697, Found 457.2694.

## 8. Experimental procedure for the scale-up reaction and transformations of the products

### a) Scale-up of the reaction

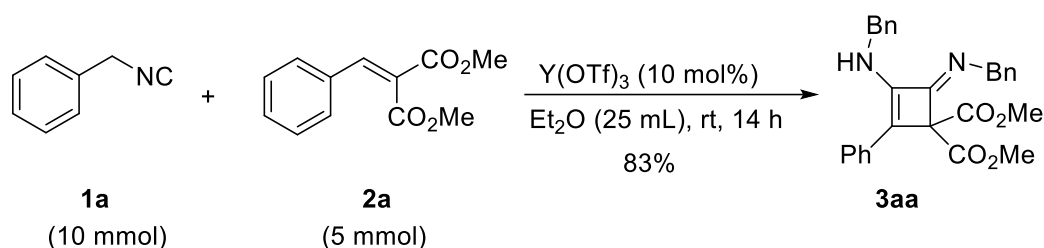

**Procedure:** The **1a** (10 mmol, 1.17 g), **2a** (5 mmol, 1.10 g) and Y(OTf)<sub>3</sub> (10 mol%) was added into a dry round bottle, then anhydrous ether (25 mL) was added. The reaction mixture was stirred at room temperature for 14 h. TLC monitored that the reaction was complete. The solvent was removed under reduced pressure. The residue was subjected to silica gel column chromatography to obtain product **3aa** in 83% yield (petroleum ether/ethyl acetate=10:1).

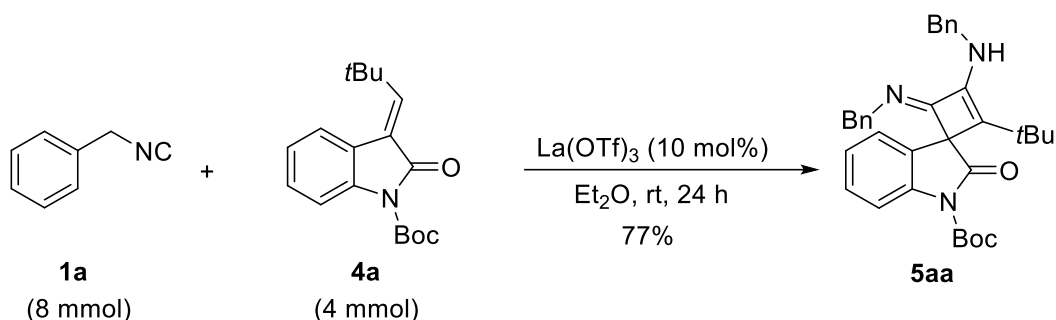

**Procedure:** The **1a** (8 mmol, 0.93 g), **4a** (4 mmol, 1.20 g) and La(OTf)<sub>3</sub> (10 mol%) was added into a dry round bottle, then anhydrous ether (20 mL) was added. The reaction mixture was stirred at room temperature for 24 h. TLC monitored that the reaction was complete. The solvent was removed under reduced pressure. The residue was subjected to silica gel column chromatography to obtain product **5aa** in 77% yield (petroleum ether/ethyl acetate=5:1).

### b) [2+1] cycloaddition reaction

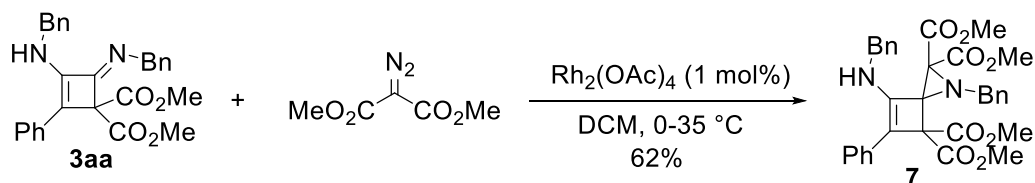

**Procedure:** To a dry reaction tube was added **3aa** (0.1 mmol, 45 mg) and rhodium acetate dimer (1 mol%, 0.4 mg), then CH<sub>2</sub>Cl<sub>2</sub> (0.5 mL) was added. The reaction mixture was stirred at 0 °C for 10 minutes under N<sub>2</sub>. Next, a solution of dimethyl diazomalonate (0.2 mmol, 31.6 mg) in CH<sub>2</sub>Cl<sub>2</sub> (0.5 ml) was dropped into the reaction mixture, the reaction mixture was stirred at 35 °C for 20 h. After the starting material was consumed, saturated NaHCO<sub>3</sub> aqueous solution was added to quench the reaction, the residue was diluted with ethyl acetate, washed with water, dried over anhydrous Na<sub>2</sub>SO<sub>4</sub>, and the solvent was removed in

vacuo. The crude product was purified by flash silica gel column chromatography using petroleum ether/ethyl acetate = 10/1 as eluent to afford the desired product **7** in 62% yield.

**Tetramethyl 1-benzyl-6-(benzylamino)-5-phenyl-1-azaspiro[2.3]hex-5-ene-2,2,4,4-tetracarboxylate **7****

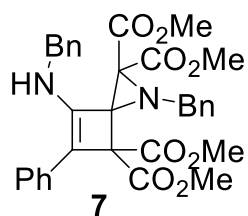

The reaction was run at 35 °C for 20 h, affording product **7** in 62% yield (36.1 mg) as a white solid.  $R_f = 0.3$  (PE:EA = 3:1), m.p. 79–81 °C.

$^1\text{H NMR}$  (600 MHz,  $\text{CDCl}_3$ )  $\delta$  7.34 – 7.27 (m, 4H), 7.23 (t,  $J = 7.2$  Hz, 1H), 7.20 – 7.15 (m, 5H), 7.15 – 7.08 (m, 3H), 7.03 (d,  $J = 6.1$  Hz, 2H), 6.30 (s, 1H), 4.77 (s, 2H), 4.61 (s, 2H), 3.63 (d,  $J = 1.9$  Hz, 12H).

$^{13}\text{C NMR}$  (151 MHz,  $\text{CDCl}_3$ )  $\delta$  169.0, 167.5, 151.7, 145.5, 139.6, 136.9, 131.8, 128.7, 128.1, 127.8, 127.7, 127.2, 127.0, 126.6, 126.5, 124.4, 69.7, 64.1, 55.3, 52.6, 51.9.

HRMS (ESI-TOF) calcd for  $\text{C}_{33}\text{H}_{33}\text{N}_2\text{O}_8^+$  ( $[\text{M}+\text{H}^+]$ ) = 585.2232, Found 585.2232.

**c) Reductive ring expansion reaction**

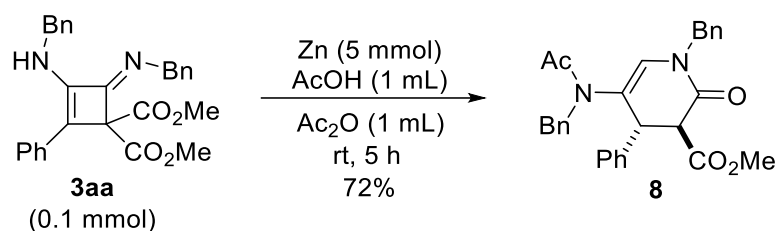

**Procedure:** To a dry round-bottom flask was added **3aa** (0.1 mmol, 45 mg) under nitrogen, then AcOH (1 mL) and  $\text{Ac}_2\text{O}$  (1 mL) was added. Next, activated Zn powder (5 mmol, 32.6 mg) was slowly added to the reaction mixture. The reaction mixture was stirred at room temperature for 5 hours. The reaction was monitored by TLC, after the starting material was completed, the precipitate was filtered out and the solvent was removed under reduced pressure. Saturated  $\text{NaHCO}_3$  aqueous solution was added to the mixture to adjust the pH of the solution to 8.0-9.0. The solution was then diluted with ethyl acetate, washed with water, dried over  $\text{Na}_2\text{SO}_4$ , and concentrated under reduced pressure. The crude product was purified by flash silica gel column chromatography using petroleum ether/ethyl acetate = 10/1 as eluent to afford the product **8** in 72% yield.

**Methyl 6-(N-benzylacetamido)-5-(benzylamino)-2-oxo-4-phenyl-5,6-dihydro-2H-pyran-3-carboxylate **8****

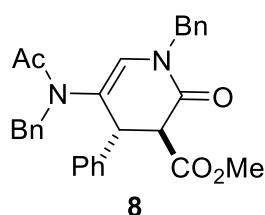

The reaction was run at rt for 5 h, affording product **8** in 72% yield (33.7 mg) as a white solid.  $R_f = 0.4$  (PE:EA = 3:1), m.p. 68–70 °C.

$^1\text{H NMR}$  (400 MHz,  $\text{CDCl}_3$ )  $\delta$  7.34 – 7.27 (m, 6H), 7.21 – 7.16 (m, 5H), 7.08 – 7.02 (m, 2H), 6.96 – 6.89 (m, 2H), 5.43 (d,  $J = 1.8$  Hz, 1H), 4.85 (d,  $J = 15.5$  Hz,

1H), 4.64 (d,  $J = 15.4$  Hz, 1H), 4.55 (d,  $J = 14.0$  Hz, 1H), 4.33 – 4.30 (m, 1H), 3.83 (s, 3H), 3.68 (d,  $J = 3.1$  Hz, 1H), 3.51 (d,  $J = 14.0$  Hz, 1H), 1.51 (s, 3H).

$^{13}\text{C}$  NMR (101 MHz,  $\text{CDCl}_3$ )  $\delta$  171.3, 169.4, 168.7, 145.1, 139.7, 136.8, 134.5, 129.3, 128.9, 128.7, 128.4, 128.2, 128.0, 127.3, 127.1, 126.9, 107.6, 56.3, 53.3, 50.5, 44.8, 44.4, 21.6.

HRMS (ESI-TOF) calcd for  $\text{C}_{29}\text{H}_{29}\text{N}_2\text{O}_4^+$  ( $[\text{M}+\text{H}^+]$ ) = 469.2122, Found 469.2121.

#### d) Deprotection reaction

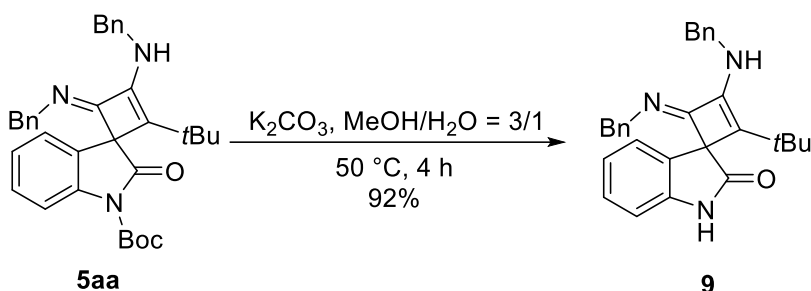

**Procedure:** The **5aa** (0.1 mmol, 53.5 mg), potassium carbonate (0.25 mmol, 34.5 mg) and methanol/water = 3/1 (1 mL) was added to a round bottom flask. After the reaction mixture was stirred at 50 °C for 4 h, the solution was concentrated under reduced pressure. The crude product was purified by column chromatography with petroleum ether/ethyl acetate = 2/1 as eluent to afford the product **9** in 92% yield.

#### 3-(benzylamino)-4-(benzylimino)-2-(tert-butyl)spiro[cyclobutane-1,3'-indolin]-2-en-2'-one **9**

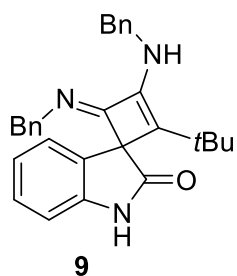

Yellow solid.  $R_f = 0.3$  (PE:EA = 2:1), m.p. 151–152 °C.

$^1\text{H}$  NMR (600 MHz,  $\text{CDCl}_3$ )  $\delta$  9.49 (d,  $J = 7.2$  Hz, 1H), 7.44 – 7.40 (m, 2H), 7.40 – 7.35 (m, 2H), 7.33 – 7.28 (m, 1H), 7.24 (td,  $J = 7.7, 1.3$  Hz, 1H), 7.15 (dd,  $J = 7.4, 1.2$  Hz, 1H), 7.13 – 7.06 (m, 3H), 7.00 (td,  $J = 7.5, 1.0$  Hz, 1H), 6.97 (d,  $J = 7.7$  Hz, 1H), 6.95 – 6.92 (m, 2H), 4.87 (dd,  $J = 14.7, 7.2$  Hz, 1H), 4.68 (dd,  $J = 14.7, 5.8$  Hz, 1H), 4.07 (dd,  $J = 14.5, 3.1$  Hz, 1H), 4.06 – 4.01 (m, 1H), 3.86 (dd,  $J = 14.3, 2.4$  Hz,

1H), 1.02 (d,  $J = 2.3$  Hz, 9H).

$^{13}\text{C}$  NMR (151 MHz,  $\text{CDCl}_3$ )  $\delta$  180.1, 155.1, 145.5, 140.6, 140.0, 139.2, 133.0, 129.6, 128.5, 127.9, 127.6, 127.6, 127.1, 126.4, 123.9, 122.4, 110.4, 65.6, 55.3, 49.0, 34.7, 29.1.

HRMS (ESI-TOF) calcd for  $\text{C}_{29}\text{H}_{30}\text{N}_3\text{O}^+$  ( $[\text{M}+\text{H}^+]$ ) = 436.2384, Found 436.2380.

#### e) Addition reaction

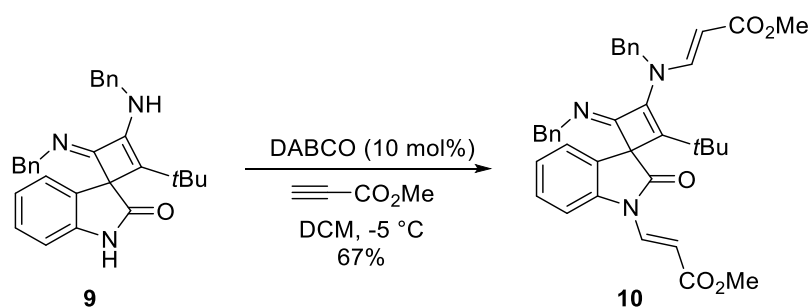

**Procedure:** The compound **9** (0.1 mmol, 43.6 mg) was dissolved in CH<sub>2</sub>Cl<sub>2</sub> (1 mL). DABCO (0.01 mmol, 1.2 mg) was added, the reaction mixture was cooled down to -5 °C. Then methyl propionate (0.25 mmol, 21 mg) was slowly added, the reaction mixture continued to stir at -5 °C for 0.5 h. The solution was concentrated under reduced pressure. The crude product was purified by column chromatography with petroleum ether/ethyl acetate = 4/1 as eluent to afford the product **10** in 67% yield.

**methyl-3-(3-(benzyl(3-methoxy-3-oxoprop-1-en-1-yl)amino)-4-(benzylimino)-2-(tert-butyl)-2'-oxospiro[cyclobutane-1,3'-indolin]-2-en-1'-yl)acrylate **10****

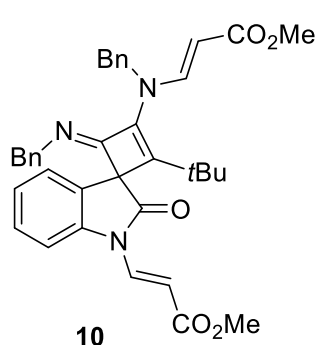

**10**

Yellow solid.  $R_f = 0.2$  (PE:EA = 4:1), m.p. 121–123 °C.

<sup>1</sup>H NMR (400 MHz, CDCl<sub>3</sub>)  $\delta$  8.01 (d,  $J = 14.5$  Hz, 1H), 7.58 (d,  $J = 12.2$  Hz, 1H), 7.42 – 7.33 (m, 5H), 7.32 – 7.26 (m, 2H), 7.21 (dd,  $J = 7.5, 1.4$  Hz, 1H), 7.18 – 7.10 (m, 4H), 6.90 – 6.86 (m, 2H), 6.78 (d,  $J = 14.5$  Hz, 1H), 5.67 (d,  $J = 12.2$  Hz, 1H), 4.85 – 4.68 (ddd,  $J = 35.1, 14.8, 6.8$  Hz, 2H), 4.07 (t,  $J = 6.5$  Hz, 1H), 4.00 (d,  $J = 14.3$  Hz, 1H), 3.81 (s, 3H), 3.78 (s, 1H), 3.74 (s, 3H), 0.98 (s, 9H).

<sup>13</sup>C NMR (101 MHz, CDCl<sub>3</sub>)  $\delta$  176.5, 168.2, 166.3, 157.3, 154.1, 146.2, 140.5, 139.4, 138.8, 134.1, 132.8, 129.1, 128.9, 128.5, 128.0, 127.5, 127.2, 126.6, 124.5, 124.3, 110.3, 105.7, 104.0, 64.9, 55.5, 51.5, 49.0, 34.5, 29.1.

HRMS (ESI-TOF) calcd for C<sub>37</sub>H<sub>38</sub>N<sub>3</sub>O<sub>5</sub><sup>+</sup>([M+H<sup>+</sup>]) = 604.2806, Found 604.2806.

**f) Suzuki coupling reaction**

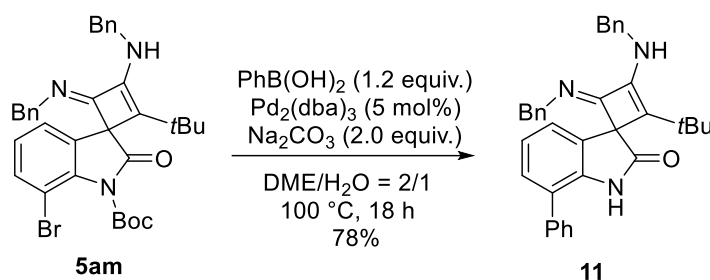

**5am**

**11**

**Procedure:** A dry reaction tube was charged with **5am** (0.1 mmol, 61.4 mg), sodium carbonate (0.2 mmol, 21.2 mg), Pd<sub>2</sub>(dba)<sub>3</sub> (5 mol%, 4.6 mg) and phenylboronic acid (0.12 mmol, 14.6 mg) under nitrogen. After adding ethylene glycol dimethyl ether/H<sub>2</sub>O (2.3 mL, 2/1), the reaction mixture was placed at 100 °C and stirred for 18 h. The solution was concentrated under reduced pressure. The crude product was purified by column chromatography with petroleum ether/ethyl acetate = 2/1 as eluent to afford the product **11** in 78% yield.

**3-(benzylamino)-4-(benzylimino)-2-(tert-butyl)-7'-phenylspiro[cyclobutane-1,3'-indolin]-2-en-2'-one **11****

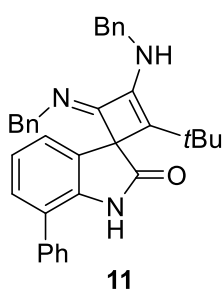

Yellow solid.  $R_f = 0.3$  (PE:EA = 2:1), m.p. 109–111 °C.

$^1\text{H}$  NMR (400 MHz,  $\text{CDCl}_3$ )  $\delta$  7.88 (s, 1H), 7.52 – 7.45 (m, 4H), 7.42 – 7.34 (m, 5H), 7.33 – 7.27 (m, 2H), 7.19 – 7.12 (m, 4H), 7.08 (t,  $J = 7.5$  Hz, 1H), 7.00 – 6.96 (m, 2H), 4.86 (dd,  $J = 14.6, 6.9$  Hz, 1H), 4.71 (dd,  $J = 14.7, 5.7$  Hz, 1H), 4.17 (d,  $J = 14.4$  Hz, 1H), 4.03 (t,  $J = 6.4$  Hz, 1H), 3.94 (d,  $J = 14.4$  Hz, 1H), 1.07 (s, 9H).

$^{13}\text{C}$  NMR (101 MHz,  $\text{CDCl}_3$ )  $\delta$  178.5, 155.0, 145.6, 140.6, 139.3, 137.4, 137.0, 132.8, 130.1, 129.2, 128.8, 128.5, 128.0, 127.9, 127.8, 127.7, 127.6, 127.5, 127.1, 126.5, 124.2, 123.1, 122.9, 65.7, 55.3, 49.0, 34.7, 29.2.

HRMS (ESI-TOF) calcd for  $\text{C}_{35}\text{H}_{34}\text{N}_3\text{O}^+$  ( $[\text{M}+\text{H}^+]$ ) = 512.2697, Found 512.2696.

### g) Sonogashira coupling reaction

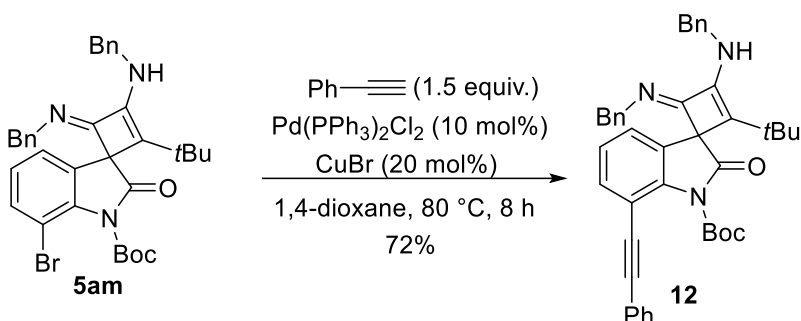

**Procedure:** A dry reaction tube was charged with **5am** (0.1 mmol, 61.4 mg), phenylacetylene (0.15 mmol, 15.3 mg), bis (triphenylphosphine) palladium dichloride (0.01 mmol, 7.0 mg) and copper bromide (0.02 mmol, 3 mg) under nitrogen. The 1,4-dioxane (1 mL) was added. Then the reaction mixture was stirred at 80 °C for 8 h. The solution was concentrated under reduced pressure. The crude product was purified by column chromatography with petroleum ether/ethyl acetate = 4/1 as eluent to afford the product **12** in 72% yield.

### tert-butyl -3-(benzylamino)-4-(benzylimino)-2-(tert-butyl)-2'-oxo-7'-(phenylethynyl)spiro [cyclobutane-1,3'-indolin]-2-ene-1'-carboxylate **12**

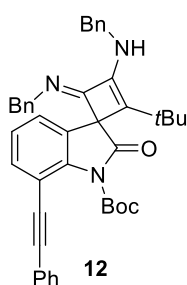

Brown solid.  $R_f = 0.4$  (PE:EA = 5:1), m.p. 87–88 °C.

$^1\text{H}$  NMR (400 MHz,  $\text{CDCl}_3$ )  $\delta$  7.46 (d,  $J = 8.2$  Hz, 1H), 7.39 – 7.32 (m, 5H), 7.31 – 7.27 (m, 2H), 7.26 (s, 1H), 7.18 – 7.11 (m, 4H), 7.08 (d,  $J = 7.4$  Hz, 1H), 7.06 – 7.00 (m, 1H), 6.96 (d,  $J = 7.9$  Hz, 3H), 4.80 – 4.71 (m, 2H), 4.09 (d,  $J = 14.4$  Hz, 1H), 4.02 (t,  $J = 6.6$  Hz, 1H), 3.86 (d,  $J = 14.4$  Hz, 1H), 1.58 (s, 9H), 1.00 (s, 9H).

$^{13}\text{C}$  NMR (151 MHz,  $\text{CDCl}_3$ )  $\delta$  175.6, 153.7, 148.4, 146.2, 140.4, 138.9, 137.8, 133.3, 132.3, 132.0, 128.6, 128.0, 127.6, 127.5, 127.2, 126.5, 125.3, 122.5, 107.0, 85.3, 66.1, 55.9, 49.0, 34.5, 29.2, 27.7.

HRMS (ESI-TOF) calcd for  $\text{C}_{42}\text{H}_{42}\text{N}_3\text{O}_3^+$  ( $[\text{M}+\text{H}^+]$ ) = 636.3221, Found 636.3215.

## 9. X-ray crystallographic data of 3aa, 5aa and 6a

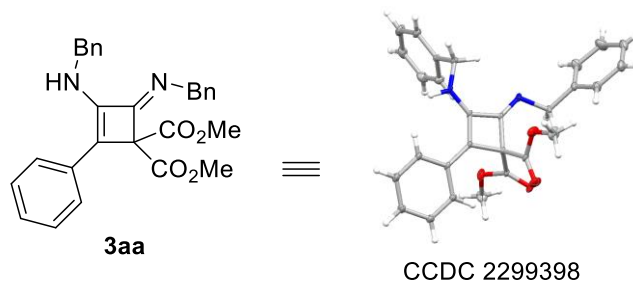

The single crystal for compound **3aa** was obtained by vaporization of a mixture solvent of Petroleum ether and ethyl acetate (v/v = 2:1). The data were collected on a Xcalibur Eos diffractometer equipped with MoK $\alpha$  X-ray sources ( $\lambda = 1.54178 \text{ \AA}$ ).

X-ray derived ORTEP of **3aa** with thermal ellipsoids shown at the 30% probability level.

Structure deposited at the Cambridge Crystallographic Data Centre. CCDC 2299398 contains the supplementary crystallographic data which can be obtained free of charge from the Cambridge Crystallographic Data Center via <https://www.ccdc.cam.ac.uk/structures/>.

|                                                |                                                                      |
|------------------------------------------------|----------------------------------------------------------------------|
| Empirical formula                              | C <sub>28</sub> H <sub>26</sub> N <sub>2</sub> O <sub>4</sub>        |
| Formula weight                                 | 454.51                                                               |
| Temperature/K                                  | 173(2)                                                               |
| Crystal system                                 | orthorhombic                                                         |
| Space group                                    | Pna2(1)                                                              |
| a/ $\text{\AA}$                                | 21.1225(6)                                                           |
| b/ $\text{\AA}$                                | 13.4659(3)                                                           |
| c/ $\text{\AA}$                                | 8.2008(2)                                                            |
| $\alpha/^\circ$                                | 90                                                                   |
| $\beta/^\circ$                                 | 90                                                                   |
| $\gamma/^\circ$                                | 90                                                                   |
| Volume/ $\text{\AA}^3$                         | 2332.58(10)                                                          |
| Z                                              | 4                                                                    |
| $\rho_{\text{calc}}/\text{g/cm}^3$             | 1.294                                                                |
| $\mu/\text{mm}^{-1}$                           | 0.702                                                                |
| F(000)                                         | 960                                                                  |
| Crystal size/ $\text{mm}^3$                    | 0.35 $\times$ 0.3 $\times$ 0.25                                      |
| Radiation                                      | CuK $\alpha$ ( $\lambda = 1.54178$ )                                 |
| 2 $\Theta$ range for data collection/ $^\circ$ | 7.786 to 136.542                                                     |
| Index ranges                                   | -23 $\leq$ h $\leq$ 25, -14 $\leq$ k $\leq$ 16, -8 $\leq$ l $\leq$ 9 |
| Reflections collected                          | 11968                                                                |
| Independent reflections                        | 3457 [ $R_{\text{int}} = 0.0729$ , $R_{\text{sigma}} = 0.0671$ ]     |
| Data/restraints/parameters                     | 3457/2/313                                                           |
| Goodness-of-fit on F <sup>2</sup>              | 1.066                                                                |
| Final R indexes [ $I \geq 2\sigma(I)$ ]        | $R_1 = 0.0727$ , $wR_2 = 0.1559$                                     |
| Final R indexes [all data]                     | $R_1 = 0.0841$ , $wR_2 = 0.1657$                                     |
| Largest diff. peak/hole/ $e \text{ \AA}^{-3}$  | 0.32/-0.34                                                           |

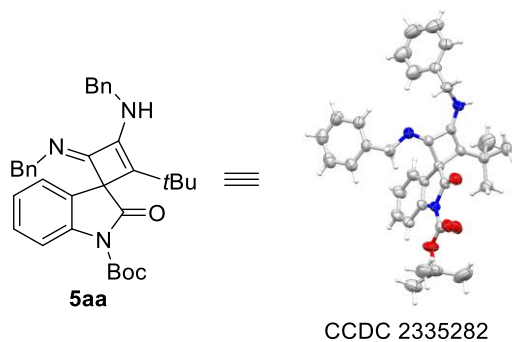

The single crystal for compound **5aa** was obtained by vaporization of a mixture solvent of ethyl acetate and petroleum ether (v/v = 1:10). The data were collected on a Xcalibur Eos diffractometer equipped with MoK $\alpha$  X-ray sources ( $\lambda = 1.54178 \text{ \AA}$ ).

X-ray derived ORTEP of **5aa** with thermal ellipsoids shown at the 30% probability level.

Structure deposited at the Cambridge Crystallographic Data Centre. CCDC 2335282 contains the supplementary crystallographic data which can be obtained free of charge from the Cambridge Crystallographic Data Center via <https://www.ccdc.cam.ac.uk/structures/>.

Crystal data and structure refinement for CCDC 2335282

|                                                         |                                                                   |
|---------------------------------------------------------|-------------------------------------------------------------------|
| Empirical formula                                       | C <sub>34</sub> H <sub>37</sub> N <sub>3</sub> O <sub>3</sub>     |
| Formula weight                                          | 536.66                                                            |
| Temperature/K                                           | 290.00                                                            |
| Crystal system                                          | Monoclinic                                                        |
| Space group                                             | P121/c1                                                           |
| a/ $\text{\AA}$                                         | 12.9218(6)                                                        |
| b/ $\text{\AA}$                                         | 9.7348(5)                                                         |
| c/ $\text{\AA}$                                         | 24.6695(12)                                                       |
| $\alpha/^\circ$                                         | 90                                                                |
| $\beta/^\circ$                                          | 91.204(3)                                                         |
| $\gamma/^\circ$                                         | 90                                                                |
| Volume/ $\text{\AA}^3$                                  | 3102.5(3)                                                         |
| Z                                                       | 4                                                                 |
| $\rho_{\text{calc}}/\text{cm}^3$                        | 1.147                                                             |
| $\mu/\text{mm}^{-1}$                                    | 0.582                                                             |
| F(000)                                                  | 1144.0                                                            |
| Crystal size/ $\text{mm}^3$                             | 0.1 $\times$ 0.1 $\times$ 0.1                                     |
| Radiation                                               | MoK $\alpha$ ( $\lambda = 1.54178$ )                              |
| 2 $\Theta$ range for $\theta$ data collection/ $^\circ$ | 6.842 to 136.806                                                  |
| Index ranges                                            | -15 $\leq h \leq 15$ , -11 $\leq k \leq 9$ , -29 $\leq l \leq 29$ |
| Reflections collected                                   | 5652                                                              |
| Independent reflections                                 | 22284 [Rint = 0.1247, Rsigma = 0.1063]                            |
| Data/restraints/parameters                              | 5652/78/395                                                       |
| Goodness-of-fit on F <sup>2</sup>                       | 1.142                                                             |
| Final R indexes [I $\geq 2\sigma$ (I)]                  | R <sup>1</sup> = 0.0973, wR <sup>2</sup> = 0.2789                 |
| Final R indexes [all data]                              | R <sup>1</sup> = 0.2098, wR <sup>2</sup> = 0.3638                 |



---

Largest diff. peak/hole/e Å<sup>-3</sup> 0.34/-0.34

---

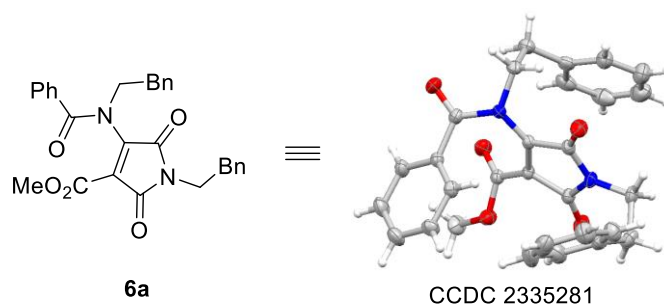

The single crystal for compound **6a** was obtained by vaporization of a mixture solvent of petroleum ether and ethyl acetate (v/v = 2:1). The data were collected on a Xcalibur Eos diffractometer equipped with MoK $\alpha$  X-ray sources ( $\lambda$  = 0.71073 Å).

X-ray derived ORTEP of **6a** with thermal ellipsoids shown at the 30% probability level.

Structure deposited at the Cambridge Crystallographic Data Centre. CCDC 2335281 contains the supplementary crystallographic data which can be obtained free of charge from the Cambridge Crystallographic Data Center via <https://www.ccdc.cam.ac.uk/structures/>.

---

|                                        |                                                               |
|----------------------------------------|---------------------------------------------------------------|
| Empirical formula                      | C <sub>29</sub> H <sub>26</sub> N <sub>2</sub> O <sub>5</sub> |
| Formula weight                         | 482.52                                                        |
| Temperature/K                          | 293.15                                                        |
| Crystal system                         | orthorhombic                                                  |
| Space group                            | Pbca                                                          |
| a/Å                                    | 36.7020(16)                                                   |
| b/Å                                    | 8.5520(4)                                                     |
| c/Å                                    | 15.8388(8)                                                    |
| $\alpha$ /°                            | 90                                                            |
| $\beta$ /°                             | 90                                                            |
| $\gamma$ /°                            | 90                                                            |
| Volume/Å <sup>3</sup>                  | 4971.4(4)                                                     |
| Z                                      | 8                                                             |
| $\rho_{\text{calc}}$ /cm <sup>3</sup>  | 1.289                                                         |
| $\mu$ /mm <sup>-1</sup>                | 0.089                                                         |
| F(000)                                 | 2032.0                                                        |
| Crystal size/mm <sup>3</sup>           | 0.35 × 0.3 × 0.25                                             |
| Radiation                              | MoK $\alpha$ ( $\lambda$ = 0.71073)                           |
| 2 $\theta$ range for data collection/° | 6.128 to 52.736                                               |
| Index ranges                           | -45 ≤ h ≤ 45, -10 ≤ k ≤ 7, -11 ≤ l ≤ 19                       |
| Reflections collected                  | 15777                                                         |
| Independent reflections                | 5077 [R <sub>int</sub> = 0.0422, R <sub>sigma</sub> = 0.0587] |
| Data/restraints/parameters             | 5077/0/326                                                    |
| Goodness-of-fit on F <sup>2</sup>      | 1.051                                                         |
| Final R indexes [I ≥ 2 $\sigma$ (I)]   | R <sub>1</sub> = 0.0616, wR <sub>2</sub> = 0.1214             |

---

---

Final R indexes [all data]  $R_1 = 0.1076$ ,  $wR_2 = 0.1468$   
Largest diff. peak/hole/e  $\text{\AA}^{-3}$  0.19/-0.24

---

## 10. A plausible mechanism

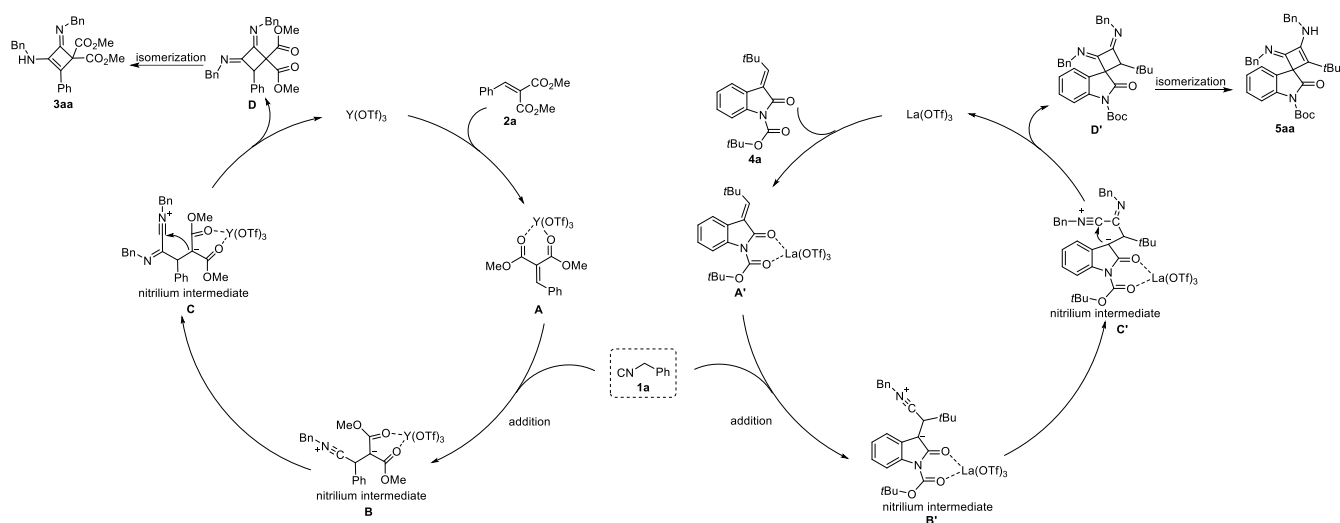

Based on the X-ray single crystal structure of the product **3aa** and previous reports, we proposed a possible reaction mechanism for the [2+1+1] cycloaddition of isocyanide with alkydene malonate. Initially, the strong bidentate coordination of the two ester groups to the yttrium metal center activated the carbon–carbon double bond of alkydene malonate **2a**, generating intermediate **A**. Nitrilium intermediate **B** is generated by Ugi-type nucleophilic attack of the isocyanide **1a**. Then the intermediate **B** was attacked by a second isocyanide **1a**, giving rise to the nitrilium intermediate **C**. Next, intramolecular trapping of the nitrilium intermediate by the  $\alpha$ -anion of the alkydene malonate occurred to afford the cyclobutane derivatives and regenerated the catalyst. Finally, imine-enamine isomerization occurs smoothly, affording desired product **3aa**.

The mechanism of the [2+1+1] cycloaddition of isocyanide with 3-alkenyl-oxindole was similar with the above mechanism.

## 11. Quantum chemical calculations

The exchange and correlation electronic effects are considered by employing the density functional theory (DFT)<sup>4</sup> at the M06-2X-D3 level,<sup>5</sup> which included Grimme's zero-damping D3-dispersion correction.<sup>6</sup> The ultrafine grid (99,590), having 99 radial shells and 590 angular points per shell, is used to evaluate the numerical integration accuracy. Geometry optimizations are performed with the double-zeta basis set 6-31G(d,p) in the ethyl acetate medium while using Truhlar's SMD solvation model.<sup>7</sup> The temperature is set to 298.15 K for thermochemistry analysis. Based on the optimized structures, the electronic energy ( $E_{\text{electron}}$ ) and solvation free energy ( $\Delta G_{\text{solv}}$ ) are calculated at the same level of theory. The harmonic vibrational frequencies are analyzed after the geometry optimizations to characterize the nature of the stationary point as a minimum with all positive frequencies or as a transition state with only one imaginary frequency and to provide the zero-point energy ( $E_{\text{ZPE}}$ ), total entropy ( $S_{\text{tot}}$ ) and thermal correction to enthalpy ( $H_{\text{corr}}$ ) at the same theoretical level. The Gibbs free energies of free substrates ( $G_i$ ) are defined as reference-point. In addition, the intrinsic reaction coordinate (IRC)<sup>8</sup> calculations are carried out to verify the transition state (TS) associated with the correct reactant complexes (RC), intermediates (IM) and product complexes (PC) at the same level of theory. All calculations were carried out with Gaussian 16 program.<sup>9</sup>

$$G = E_{\text{electron}} + \Delta G_{\text{solv}} + E_{\text{ZPE}} + H_{\text{corr}} - TS_{\text{tot}} \quad (1)$$

$$\Delta G = G - \sum_i G_i \quad (2)$$

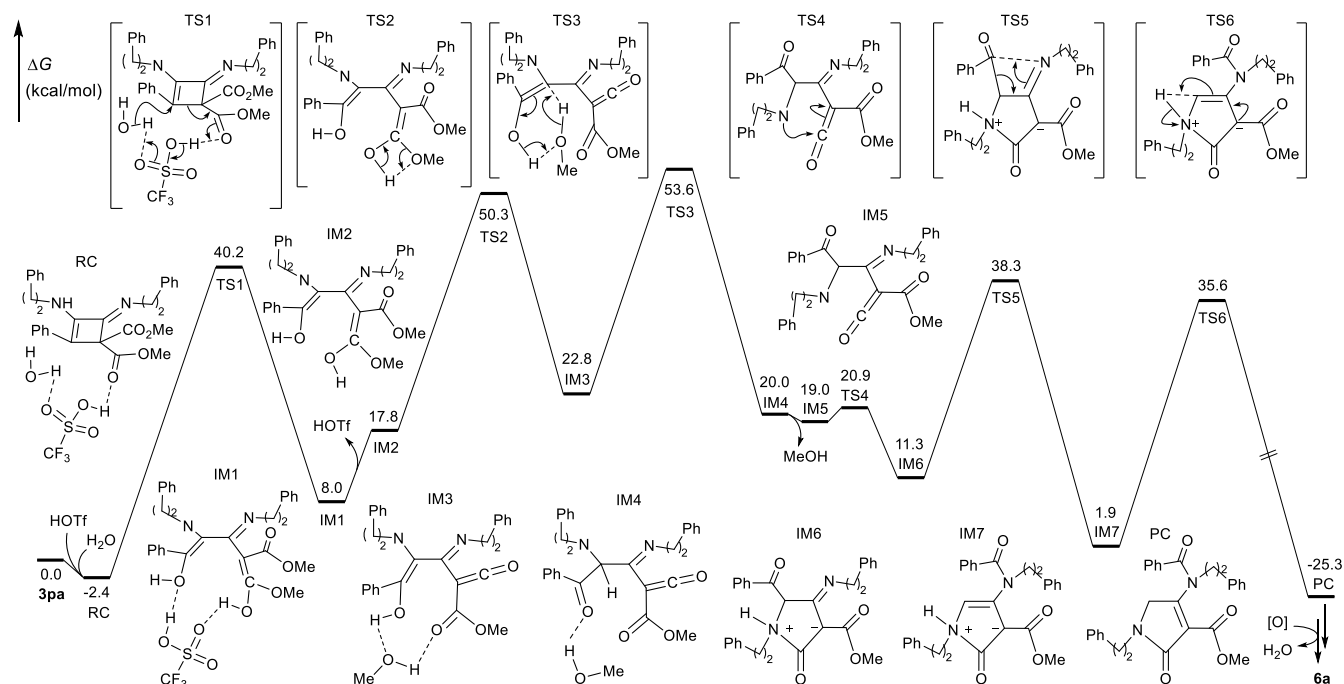

Figure 1. Relative energy profiles (kcal/mol) of reaction pathways at the M06-2X-D3/6-31G(d,p)/SMD(Ethyl acetate) theoretical level.

## Cartesian coordinate for theoretical calculation

3pa

|   |             |             |             |
|---|-------------|-------------|-------------|
| C | -0.08715900 | -0.95943300 | 0.05991600  |
| C | -1.52469200 | -0.95624600 | -0.47322400 |
| C | -1.39612000 | 0.24563100  | -1.11409400 |
| C | 0.00818100  | 0.38633400  | -0.71688400 |
| N | 0.86720500  | 1.28645900  | -0.91317100 |
| N | -2.15876000 | 1.12142100  | -1.82105200 |
| H | -1.66870100 | 1.99623800  | -1.97922300 |
| C | 2.19904800  | 1.10492900  | -0.35470600 |
| H | 2.26804200  | 0.21845300  | 0.28968800  |
| H | 2.43777300  | 1.98682700  | 0.25137900  |
| C | -3.57854600 | 1.29170400  | -1.52146700 |
| H | -3.95432000 | 2.05941000  | -2.20302600 |
| H | -4.11194100 | 0.36365000  | -1.74309100 |
| C | 3.22341800  | 0.97824000  | -1.48954000 |
| H | 3.21487400  | 1.89577600  | -2.08614400 |
| H | 2.90710100  | 0.14960000  | -2.12992600 |
| C | 4.60089000  | 0.70935300  | -0.93849400 |
| C | 4.94241500  | -0.58211500 | -0.52113900 |
| C | 5.53654800  | 1.73454000  | -0.78365000 |
| C | 6.19306100  | -0.84296800 | 0.03113700  |
| H | 4.21324400  | -1.38140000 | -0.63799700 |
| C | 6.79036400  | 1.47667800  | -0.23163300 |
| H | 5.28053100  | 2.74193100  | -1.10304000 |
| C | 7.12184400  | 0.18714700  | 0.17703000  |
| H | 6.44584800  | -1.85129700 | 0.34539100  |
| H | 7.50885700  | 2.28363900  | -0.12276400 |
| H | 8.09883200  | -0.01536200 | 0.60500500  |
| C | -2.58738800 | -1.94030400 | -0.30382100 |
| C | -2.67915100 | -2.71078000 | 0.86544900  |
| C | -3.52577300 | -2.15173200 | -1.32618800 |
| C | -3.69985200 | -3.64138900 | 1.01818900  |
| H | -1.95466000 | -2.56886700 | 1.66105900  |
| C | -4.54713600 | -3.08321600 | -1.16856700 |
| H | -3.42596700 | -1.60587600 | -2.26006000 |
| C | -4.64106600 | -3.82703000 | 0.00572000  |
| H | -3.76260000 | -4.22358200 | 1.93224600  |
| H | -5.26278700 | -3.23681200 | -1.97023400 |
| H | -5.43677300 | -4.55499300 | 0.12822100  |
| C | 0.04815400  | -0.76490500 | 1.56476900  |
| O | -0.76531600 | -0.18838800 | 2.24723400  |
| O | 1.19100600  | -1.26998600 | 2.03240900  |
| C | 0.79934800  | -2.07595000 | -0.45787900 |
| O | 1.72855100  | -1.93299500 | -1.21845700 |
| O | 0.39104400  | -3.25576200 | 0.00896600  |
| C | 1.43343200  | -1.06347400 | 3.43118400  |
| H | 0.64982600  | -1.53953800 | 4.02345000  |
| H | 2.39888700  | -1.52274200 | 3.63425200  |
| H | 1.46297700  | 0.00470800  | 3.65414600  |
| C | 1.15038400  | -4.38844100 | -0.43109200 |
| H | 2.18766300  | -4.29831100 | -0.10168000 |
| H | 0.67964600  | -5.25663100 | 0.02640900  |
| H | 1.11932800  | -4.46672500 | -1.51939400 |
| C | -3.84869400 | 1.70276000  | -0.06389900 |
| H | -4.92867900 | 1.84107300  | 0.05453300  |
| H | -3.54547200 | 0.88508600  | 0.59965800  |
| C | -3.10380300 | 2.96263500  | 0.29939700  |
| C | -3.58999700 | 4.21640900  | -0.08560300 |
| C | -1.87070900 | 2.89268000  | 0.95442300  |
| C | -2.86327000 | 5.37399300  | 0.18036400  |
| H | -4.54880000 | 4.28346700  | -0.59523700 |
| C | -1.13817600 | 4.04908400  | 1.21664600  |
| H | -1.49205100 | 1.92200200  | 1.26872800  |
| C | -1.63221900 | 5.29271600  | 0.83015500  |
| H | -3.25720800 | 6.34043500  | -0.11963700 |
| H | -0.18108200 | 3.97612800  | 1.72485000  |
| H | -1.06379100 | 6.19449200  | 1.03577600  |

RC  
C  
C  
C  
N  
N  
H  
C  
H  
H  
C  
H  
H  
C  
C  
C  
C  
H  
C  
H  
C  
H  
H  
H  
C  
C  
C  
C  
H  
C  
H  
C  
H  
H  
C  
O  
O  
C  
O  
C  
H  
H  
H  
C  
H  
H  
C  
H  
C  
C  
C  
C  
H  
C  
H  
H  
O  
H  
H

|             |             |             |
|-------------|-------------|-------------|
| -0.06227400 | -0.43664400 | 0.69754900  |
| 1.37973000  | -0.19848300 | 0.21538700  |
| 0.98869000  | 0.37089300  | -0.96762100 |
| -0.43274500 | 0.23229000  | -0.64867200 |
| -1.48503100 | 0.48353200  | -1.29490300 |
| 1.49882400  | 0.90005700  | -2.11369900 |
| 0.77395900  | 1.06664300  | -2.80524200 |
| -2.75319800 | 0.00653900  | -0.76518100 |
| -3.45162700 | 0.84898600  | -0.70256800 |
| -2.66046200 | -0.42110400 | 0.24375400  |
| 2.80743800  | 0.59320500  | -2.68696000 |
| 3.01995200  | 1.38607000  | -3.40914300 |
| 3.56212300  | 0.65631400  | -1.89959500 |
| -3.31272300 | -1.05832400 | -1.72147900 |
| -2.51899600 | -1.78663200 | -1.91468200 |
| -3.57241600 | -0.58129300 | -2.67177300 |
| -4.50492300 | -1.75383200 | -1.11680800 |
| -5.77907600 | -1.18199700 | -1.16559000 |
| -4.33682700 | -2.96594300 | -0.44051300 |
| -6.86237600 | -1.80881400 | -0.55378900 |
| -5.92184500 | -0.24072300 | -1.69135100 |
| -5.41763000 | -3.59593200 | 0.17195700  |
| -3.34599600 | -3.41401200 | -0.40448100 |
| -6.68430500 | -3.01722700 | 0.11741700  |
| -7.84754400 | -1.35497200 | -0.60363600 |
| -5.27210100 | -4.54047800 | 0.68803600  |
| -7.52904400 | -3.50681600 | 0.59192500  |
| 2.63400200  | -0.53711000 | 0.87505700  |
| 3.78258700  | 0.24701900  | 0.68320000  |
| 2.70226600  | -1.63696200 | 1.74291100  |
| 4.98315900  | -0.10492000 | 1.29187200  |
| 3.71159300  | 1.16017800  | 0.09749900  |
| 3.90183300  | -1.97919100 | 2.35521300  |
| 1.81154100  | -2.22864900 | 1.93554700  |
| 5.05034300  | -1.22391000 | 2.11966600  |
| 5.86407500  | 0.50938800  | 1.13324000  |
| 3.94150500  | -2.83997000 | 3.01567600  |
| 5.98732600  | -1.49431000 | 2.59645700  |
| -0.55143700 | -1.88408900 | 0.75330100  |
| -0.73106800 | -2.57014400 | -0.22357100 |
| -0.76787800 | -2.28535300 | 2.00642000  |
| -0.46855000 | 0.31171200  | 1.95000400  |
| -1.53850400 | 0.90518700  | 2.08070600  |
| 0.42418200  | 0.25074400  | 2.89995400  |
| -1.24389700 | -3.63197200 | 2.15620500  |
| -0.53880300 | -4.33203700 | 1.70436500  |
| -1.31720300 | -3.80007600 | 3.22870500  |
| -2.22379000 | -3.73496300 | 1.68564600  |
| 0.12911400  | 0.97417300  | 4.10989400  |
| -0.77327100 | 0.57206100  | 4.57219900  |
| 0.99375800  | 0.82436900  | 4.75222900  |
| -0.00390100 | 2.03243900  | 3.88091400  |
| 2.89395300  | -0.77116600 | -3.38483300 |
| 2.02096200  | -0.89161500 | -4.03571600 |
| 3.77885300  | -0.75145000 | -4.03069300 |
| 3.00492700  | -1.93333100 | -2.42772200 |
| 1.89022700  | -2.68790500 | -2.05838400 |
| 4.24699800  | -2.25242200 | -1.86643600 |
| 2.01451200  | -3.74872300 | -1.16179000 |
| 0.91282900  | -2.43885800 | -2.46418200 |
| 4.37690200  | -3.31220400 | -0.97414600 |
| 5.12111600  | -1.66485300 | -2.13934500 |
| 3.25898200  | -4.06904900 | -0.62509500 |
| 1.13321400  | -4.31879400 | -0.88555600 |
| 5.34877200  | -3.54628700 | -0.54991200 |
| 3.35721600  | -4.89666900 | 0.07125300  |
| 2.64014900  | 3.20678200  | -0.66234400 |
| 2.17878200  | 3.09543000  | 0.17906000  |
| 2.12155000  | 2.65583900  | -1.26830200 |

|   |             |            |             |
|---|-------------|------------|-------------|
| H | -1.94781600 | 1.98800800 | 1.15764600  |
| C | -0.58939000 | 4.22675400 | -0.98648100 |
| F | 0.35612300  | 5.14666800 | -1.06134400 |
| F | -0.24497100 | 3.17208000 | -1.70861200 |
| F | -1.73114500 | 4.72062100 | -1.43659200 |
| S | -0.78713600 | 3.74479800 | 0.77656500  |
| O | 0.34298400  | 2.89003300 | 1.12051300  |
| O | -1.02336300 | 4.96769700 | 1.50600700  |
| O | -2.08582600 | 2.88480500 | 0.66073300  |

**TS1**

|   |             |             |             |
|---|-------------|-------------|-------------|
| C | 0.77181300  | 0.13155800  | 1.54275900  |
| C | -1.10973600 | 1.60246200  | 0.47132300  |
| C | -0.96744000 | 0.46279600  | -0.24443700 |
| C | 0.17044200  | -0.37743600 | 0.27791800  |
| N | 0.53259100  | -1.33975700 | -0.46243900 |
| N | -1.69153200 | -0.00942200 | -1.25288900 |
| H | -1.50494500 | -0.98569600 | -1.46170100 |
| C | 1.68913400  | -2.13571800 | -0.09968600 |
| H | 1.37417200  | -3.18483600 | -0.06182000 |
| H | 2.10263200  | -1.86417300 | 0.87899300  |
| C | -2.43725000 | 0.77119800  | -2.22123400 |
| H | -3.44719200 | 0.35802500  | -2.31001600 |
| H | -2.51499300 | 1.79276100  | -1.84729600 |
| C | 2.76357400  | -1.96412200 | -1.18532500 |
| H | 2.91157400  | -0.88980400 | -1.32949100 |
| H | 2.39792500  | -2.39448000 | -2.12344100 |
| C | 4.05953700  | -2.60912700 | -0.76615000 |
| C | 4.36718900  | -3.92514100 | -1.11819900 |
| C | 4.95653500  | -1.89925900 | 0.03908900  |
| C | 5.54961100  | -4.51939700 | -0.68084600 |
| H | 3.67563100  | -4.48570500 | -1.74278100 |
| C | 6.13845000  | -2.48939500 | 0.47741600  |
| H | 4.71182300  | -0.87496700 | 0.31415100  |
| C | 6.43813400  | -3.80290100 | 0.11774100  |
| H | 5.77764400  | -5.54217700 | -0.96559900 |
| H | 6.82776300  | -1.92472500 | 1.09820000  |
| H | 7.36022600  | -4.26461000 | 0.45708900  |
| C | -0.62784200 | 2.90448100  | 0.62836200  |
| C | -1.08400000 | 3.71636500  | 1.69453400  |
| C | 0.37442900  | 3.38077000  | -0.25289400 |
| C | -0.55017300 | 4.97886700  | 1.86594300  |
| H | -1.85964600 | 3.32911800  | 2.34668600  |
| C | 0.91910700  | 4.63902700  | -0.05355800 |
| C | 0.71567600  | 2.73504900  | -1.05726300 |
| C | 0.45201400  | 5.43163400  | 0.99737400  |
| H | -0.89522300 | 5.61607600  | 2.67257800  |
| H | 1.69580000  | 5.00702500  | -0.71564000 |
| H | 0.87365900  | 6.42143500  | 1.14502000  |
| C | 2.06544200  | 0.78948700  | 1.38956800  |
| O | 2.65066000  | 0.85713600  | 0.31761100  |
| O | 2.56427000  | 1.33867500  | 2.50555500  |
| C | 0.01831600  | 0.05587300  | 2.70444100  |
| O | -1.11806600 | -0.57974500 | 2.81737200  |
| O | 0.42063400  | 0.64359600  | 3.81253800  |
| C | 3.80420300  | 2.02479700  | 2.33561400  |
| H | 3.70476400  | 2.82569900  | 1.59931800  |
| H | 4.04806500  | 2.43823800  | 3.31345000  |
| H | 4.58913600  | 1.33725000  | 2.01162400  |
| C | -0.38844300 | 0.49315200  | 4.98837400  |
| H | -0.48973600 | -0.55959500 | 5.25623400  |
| H | 0.14736300  | 1.03194800  | 5.76766800  |
| H | -1.37592300 | 0.93153900  | 4.83459600  |
| C | -1.72940900 | 0.77449200  | -3.58378200 |
| H | -1.57842600 | -0.26159600 | -3.90723000 |
| H | -2.39582400 | 1.25018500  | -4.31047600 |
| C | -0.41150500 | 1.50908600  | -3.53060400 |
| C | 0.76406200  | 0.85535000  | -3.14379400 |
| C | -0.35199300 | 2.87579100  | -3.82341800 |
| C | 1.97227100  | 1.54723300  | -3.06893400 |

|   |             |             |             |
|---|-------------|-------------|-------------|
| H | 0.73011000  | -0.20240400 | -2.89206300 |
| C | 0.85422100  | 3.56995000  | -3.75341200 |
| C | -1.25949800 | 3.39689700  | -4.11968200 |
| C | 2.02180300  | 2.90543600  | -3.38002700 |
| H | 2.87396000  | 1.02473200  | -2.76513000 |
| H | 0.88267700  | 4.62857400  | -3.99403500 |
| H | 2.96397400  | 3.44262500  | -3.32896400 |
| O | -3.44808200 | 2.01024500  | 0.37737400  |
| H | -4.03555300 | 2.28673100  | -0.33819500 |
| H | -3.67587600 | 1.07317900  | 0.53186500  |
| H | -1.45629200 | -1.09392300 | 2.01637300  |
| C | -3.93168500 | -2.92518700 | -0.69662000 |
| F | -5.22854600 | -3.01412000 | -0.97701100 |
| F | -3.32275800 | -2.33333800 | -1.73039500 |
| F | -3.43731100 | -4.15181400 | -0.56839100 |
| S | -3.68739000 | -1.96528500 | 0.84554700  |
| O | -4.24477800 | -0.64547000 | 0.51198400  |
| O | -4.39999800 | -2.72247400 | 1.86570800  |
| O | -2.20363400 | -1.98307200 | 0.96967100  |

**IM1**

|   |             |             |             |
|---|-------------|-------------|-------------|
| C | 0.95798900  | 0.16793700  | 1.12888900  |
| C | -1.56559900 | 0.81250300  | -0.44550300 |
| C | -0.66276300 | -0.11723600 | -0.85087100 |
| C | 0.61070700  | -0.49055700 | -0.17026400 |
| N | 1.27934000  | -1.42230100 | -0.73936400 |
| N | -1.13035400 | -0.95337200 | -1.90327100 |
| H | -0.65540000 | -1.85105200 | -1.84933500 |
| C | 2.46262200  | -1.97785100 | -0.11556700 |
| H | 2.27348300  | -3.04748600 | 0.04498900  |
| H | 2.69458200  | -1.52829100 | 0.85616300  |
| C | -1.02310500 | -0.41180500 | -3.27319900 |
| H | -1.37917800 | -1.20642000 | -3.93410200 |
| H | -1.72882000 | 0.42163300  | -3.37066800 |
| C | 3.66985900  | -1.83293200 | -1.05248000 |
| H | 3.77360500  | -0.77299700 | -1.29837800 |
| H | 3.47883600  | -2.38776900 | -1.97702000 |
| C | 4.92928500  | -2.32161200 | -0.38351300 |
| C | 5.42828300  | -3.60643900 | -0.60779100 |
| C | 5.59408800  | -1.49063800 | 0.52535400  |
| C | 6.57108300  | -4.05152600 | 0.05517100  |
| H | 4.91902900  | -4.26093500 | -1.31124700 |
| C | 6.73490100  | -1.93147900 | 1.18919600  |
| H | 5.20113900  | -0.49114900 | 0.70161600  |
| C | 7.22730800  | -3.21520300 | 0.95505200  |
| H | 6.94961500  | -5.05181400 | -0.13308800 |
| H | 7.24253600  | -1.27351700 | 1.88834600  |
| H | 8.11852200  | -3.56014300 | 1.47022400  |
| C | -1.39217500 | 1.99573400  | 0.41115500  |
| C | -2.30470800 | 2.31120200  | 1.42336000  |
| C | -0.28878500 | 2.82757000  | 0.19017500  |
| C | -2.09903200 | 3.43660400  | 2.21735500  |
| H | -3.16286600 | 1.67372200  | 1.61369300  |
| C | -0.08794300 | 3.94927400  | 0.98518100  |
| H | 0.40863700  | 2.57717300  | -0.60451800 |
| C | -0.99169800 | 4.25505400  | 2.00185400  |
| H | -2.80504700 | 3.67112400  | 3.00767200  |
| H | 0.77318200  | 4.58601600  | 0.80585100  |
| H | -0.83586800 | 5.13095900  | 2.62363000  |
| C | 2.16961000  | 0.99102200  | 1.11614000  |
| O | 2.99777700  | 0.95158900  | 0.21901100  |
| O | 2.29986700  | 1.82767600  | 2.15559400  |
| C | 0.10751900  | 0.06134800  | 2.20046100  |
| O | -1.00441500 | -0.66615000 | 2.21771300  |
| O | 0.34408400  | 0.65903900  | 3.35203500  |
| C | 3.44025100  | 2.68124000  | 2.10188100  |
| H | 3.43182000  | 3.28281600  | 1.18966100  |
| H | 3.36911700  | 3.32374000  | 2.97886800  |
| H | 4.36569100  | 2.10094500  | 2.13511300  |
| C | -0.62121400 | 0.52724000  | 4.40296300  |



|   |             |             |             |
|---|-------------|-------------|-------------|
| H | -0.71740000 | -0.51389300 | 4.71624900  |
| H | -0.22833000 | 1.13012300  | 5.21988900  |
| H | -1.59289900 | 0.91097200  | 4.08601400  |
| C | 0.37222100  | 0.03949000  | -3.72324400 |
| H | 1.10964700  | -0.69993100 | -3.39402900 |
| H | 0.37516800  | 0.02960100  | -4.82046900 |
| C | 0.79197500  | 1.42046800  | -3.26488700 |
| C | 1.99890700  | 1.61379400  | -2.59155700 |
| C | 0.00708400  | 2.54437400  | -3.55744300 |
| C | 2.42746300  | 2.89305800  | -2.23533600 |
| H | 2.60367100  | 0.75258500  | -2.32622200 |
| C | 0.42808800  | 3.82235200  | -3.20179300 |
| H | -0.93666500 | 2.42004400  | -4.08365200 |
| C | 1.64704600  | 4.00313600  | -2.54594300 |
| H | 3.36702700  | 3.00875000  | -1.70416800 |
| H | -0.19308700 | 4.68023700  | -3.44137100 |
| H | 1.97735100  | 5.00094800  | -2.27309200 |
| O | -2.83584500 | 0.67690700  | -0.99732100 |
| H | -2.73773700 | -0.17491100 | -1.50833700 |
| H | -3.87172400 | 0.29743800  | 0.00041100  |
| H | -1.24226700 | -1.05316200 | 1.35713500  |
| C | -5.10420100 | -2.33110800 | -0.62976400 |
| F | -6.40249500 | -2.12415700 | -0.51224400 |
| F | -4.64898900 | -1.70118300 | -1.71022700 |
| F | -4.86001700 | -3.62454600 | -0.73519500 |
| S | -4.21953500 | -1.66347900 | 0.83416700  |
| O | -4.53307300 | -0.14126000 | 0.67366200  |
| O | -4.86289700 | -2.16633600 | 2.01964400  |
| O | -2.81582600 | -1.92660000 | 0.55650500  |

**IM2**

|   |             |             |             |
|---|-------------|-------------|-------------|
| C | -0.00615300 | 1.20502200  | -0.93160200 |
| C | 2.70063600  | -0.17892500 | -1.05170600 |
| C | 1.54992100  | -0.74037900 | -1.51081500 |
| C | 0.17077300  | -0.24258700 | -1.27095700 |
| N | -0.78227100 | -1.07311800 | -1.48848600 |
| N | 1.69677700  | -1.79515100 | -2.44703100 |
| H | 0.80465400  | -1.95279000 | -2.90742200 |
| C | -2.16614100 | -0.66101000 | -1.39566800 |
| H | -2.66904400 | -0.95249600 | -2.32670100 |
| H | -2.30073800 | 0.42339300  | -1.28517600 |
| C | 2.22613800  | -3.07169300 | -1.94856700 |
| H | 2.34203600  | -3.72202500 | -2.82107400 |
| H | 3.23021300  | -2.89757400 | -1.54768300 |
| C | -2.84557700 | -1.38801100 | -0.22358500 |
| H | -2.23279400 | -1.22793500 | 0.66803600  |
| H | -2.86438900 | -2.46226400 | -0.43884200 |
| C | -4.23787500 | -0.86354500 | 0.01179000  |
| C | -5.32534000 | -1.32267400 | -0.73631300 |
| C | -4.45044500 | 0.14354400  | 0.95822100  |
| C | -6.59767400 | -0.78896900 | -0.54202700 |
| H | -5.17259300 | -2.10875800 | -1.47240100 |
| C | -5.72074900 | 0.67932400  | 1.15572200  |
| H | -3.60159400 | 0.49804700  | 1.53901800  |
| C | -6.79877200 | 0.21443900  | 0.40412600  |
| H | -7.43390700 | -1.15916600 | -1.12768800 |
| H | -5.87028100 | 1.45774700  | 1.89848800  |
| H | -7.79058900 | 0.62855100  | 0.55721900  |
| C | 2.87152300  | 0.71541200  | 0.10285700  |
| C | 3.88770700  | 1.67968000  | 0.10297700  |
| C | 2.06421100  | 0.56888900  | 1.23773200  |
| C | 4.06922300  | 2.50673800  | 1.20779000  |
| H | 4.52963200  | 1.77393800  | -0.76716500 |
| C | 2.24309000  | 1.40346600  | 2.33665500  |
| H | 1.29563400  | -0.19916500 | 1.25401900  |
| C | 3.24566700  | 2.37406100  | 2.32592400  |
| H | 4.85588400  | 3.25513200  | 1.19721300  |
| H | 1.60594800  | 1.28159000  | 3.20772600  |
| H | 3.39219100  | 3.01665500  | 3.18873000  |
| C | -0.80421900 | 1.56248800  | 0.24249800  |

|   |             |             |             |
|---|-------------|-------------|-------------|
| O | -1.03262500 | 0.82713300  | 1.18528900  |
| O | -1.32728400 | 2.80242700  | 0.15773200  |
| C | 0.54503600  | 2.12976900  | -1.77167400 |
| O | 0.91670000  | 1.75991300  | -2.99813700 |
| O | 0.78340300  | 3.42019100  | -1.56900400 |
| C | -1.99539400 | 3.26886900  | 1.32990400  |
| H | -1.34948100 | 3.17376100  | 2.20639900  |
| H | -2.22917100 | 4.31657700  | 1.14250800  |
| H | -2.91739600 | 2.70778300  | 1.49748600  |
| C | 1.14496100  | 3.91546700  | -0.27059000 |
| H | 0.34891700  | 4.56106800  | 0.09798000  |
| H | 1.32120200  | 3.09344700  | 0.42548000  |
| H | 2.06246900  | 4.48977500  | -0.40885600 |
| C | 1.36627000  | -3.79959400 | -0.90642000 |
| H | 0.33030200  | -3.82849000 | -1.26082300 |
| H | 1.71807800  | -4.83892900 | -0.86637500 |
| C | 1.40139600  | -3.23420500 | 0.49723800  |
| C | 0.21547600  | -2.94063100 | 1.17408300  |
| C | 2.61382200  | -3.05477100 | 1.17556500  |
| C | 0.23249900  | -2.48494900 | 2.49255800  |
| H | -0.73139400 | -3.07422200 | 0.65921800  |
| C | 2.63643500  | -2.60054500 | 2.49115000  |
| H | 3.55127500  | -3.28119600 | 0.67252300  |
| C | 1.44394000  | -2.31671500 | 3.15743000  |
| H | -0.70333000 | -2.26054900 | 2.99635200  |
| H | 3.58748300  | -2.46734700 | 2.99831500  |
| H | 1.46223800  | -1.96186300 | 4.18343900  |
| O | 3.88403600  | -0.53070900 | -1.63057700 |
| H | 3.64651200  | -0.94693300 | -2.47925600 |
| H | 1.50432900  | 2.44269600  | -3.36026400 |

**TS2**

|   |             |             |             |
|---|-------------|-------------|-------------|
| C | -0.01786700 | 1.17886200  | -0.92937700 |
| C | 2.64265400  | -0.30120900 | -1.12613100 |
| C | 1.45788200  | -0.81941600 | -1.54904100 |
| C | 0.10540100  | -0.27255600 | -1.27940600 |
| N | -0.88273900 | -1.06464800 | -1.48400100 |
| N | 1.54425200  | -1.89455300 | -2.47133300 |
| H | 0.63882400  | -2.01829500 | -2.91582700 |
| C | -2.25048300 | -0.60477900 | -1.37862900 |
| H | -2.76246500 | -0.85958100 | -2.31566800 |
| H | -2.34596400 | 0.48039100  | -1.24446300 |
| C | 2.01557800  | -3.18523800 | -1.95068000 |
| H | 2.06137000  | -3.86550600 | -2.80656700 |
| C | 3.04254400  | -3.06017600 | -1.59136900 |
| C | -2.95928900 | -1.33033000 | -0.22362600 |
| H | -2.35111900 | -1.19768000 | 0.67527100  |
| H | -3.00678400 | -2.40054100 | -0.45360400 |
| C | -4.33868500 | -0.76838200 | 0.00371500  |
| C | -5.45136200 | -1.26594000 | -0.67903900 |
| C | -4.51201900 | 0.31283900  | 0.87418600  |
| C | -6.71130100 | -0.69996200 | -0.49320100 |
| H | -5.32806600 | -2.10676600 | -1.35779300 |
| C | -5.76918600 | 0.88043400  | 1.06308200  |
| H | -3.64250600 | 0.69865300  | 1.40258800  |
| C | -6.87359500 | 0.37467900  | 0.37864700  |
| H | -7.56769100 | -1.10079100 | -1.02726400 |
| H | -5.88888700 | 1.71573800  | 1.74702800  |
| H | -7.85546100 | 0.81384900  | 0.52605600  |
| C | 2.88555600  | 0.59775500  | 0.01220600  |
| C | 3.95238900  | 1.50477600  | -0.02338000 |
| C | 2.10315000  | 0.50471300  | 1.17073400  |
| C | 4.21080300  | 2.32729800  | 1.07025800  |
| H | 4.57416200  | 1.55634300  | -0.91145100 |
| C | 2.35612100  | 1.33706900  | 2.25650100  |
| H | 1.30315600  | -0.22956400 | 1.21931800  |
| C | 3.41135900  | 2.25015900  | 2.21057600  |
| H | 5.03903200  | 3.02848700  | 1.03314800  |
| H | 1.74008700  | 1.25417000  | 3.14725400  |
| H | 3.61794500  | 2.88813400  | 3.06444400  |

|   |             |             |             |
|---|-------------|-------------|-------------|
| C | -0.74823900 | 1.56281600  | 0.27580100  |
| O | -1.08416700 | 0.78872900  | 1.15331700  |
| O | -1.04296400 | 2.87710000  | 0.33291300  |
| C | 0.58860500  | 2.06071200  | -1.76984600 |
| O | 1.16110500  | 1.98723700  | -2.89601300 |
| O | 0.74033500  | 3.48811500  | -1.51569400 |
| C | -1.63631500 | 3.31589600  | 1.55534700  |
| H | -0.99959700 | 3.06102100  | 2.40612000  |
| H | -1.73612600 | 4.39717700  | 1.46597200  |
| H | -2.61998000 | 2.86100300  | 1.69185200  |
| C | 1.42978000  | 3.96598900  | -0.31893600 |
| H | 0.80939700  | 4.74328500  | 0.12113000  |
| H | 1.55909200  | 3.13142900  | 0.36882400  |
| H | 2.39366200  | 4.36132000  | -0.63760400 |
| C | 1.15253300  | -3.83058200 | -0.85726100 |
| H | 0.10278500  | -3.78873000 | -1.16686900 |
| H | 1.42951600  | -4.89206100 | -0.81106100 |
| C | 1.28778800  | -3.24905500 | 0.53448800  |
| C | 0.15274500  | -2.89355100 | 1.26721200  |
| C | 2.53990000  | -3.11872800 | 1.14913900  |
| C | 0.25689400  | -2.42749100 | 2.57795100  |
| H | -0.82478800 | -2.98844200 | 0.80281800  |
| C | 2.64962700  | -2.65249500 | 2.45615700  |
| H | 3.44001400  | -3.39292900 | 0.60373400  |
| C | 1.50690400  | -2.30838100 | 3.17886800  |
| H | -0.64147500 | -2.15519300 | 3.12434200  |
| H | 3.63041300  | -2.55813300 | 2.91282800  |
| H | 1.59364300  | -1.94579700 | 4.19865800  |
| O | 3.79213700  | -0.71022500 | -1.73021900 |
| H | 3.51315000  | -1.12551800 | -2.56723400 |
| H | 1.29598700  | 3.28605300  | -2.50959900 |

### IM3

|   |             |             |             |
|---|-------------|-------------|-------------|
| C | -1.57277300 | -1.11204400 | -0.45234700 |
| C | 1.37781600  | -1.46208900 | -0.01628800 |
| C | 0.71409700  | -0.32358400 | 0.34809900  |
| C | -0.76377200 | -0.23679300 | 0.46728000  |
| N | -1.25539500 | 0.69370700  | 1.19480700  |
| N | 1.41897600  | 0.86565200  | 0.64446600  |
| H | 0.73551000  | 1.61108800  | 0.75356600  |
| C | -2.66223800 | 1.04927000  | 1.12953100  |
| H | -2.91807200 | 1.59322000  | 2.04404700  |
| H | -3.32731500 | 0.18354200  | 1.07720600  |
| C | 2.24912600  | 0.82469800  | 1.85241900  |
| H | 1.64518600  | 0.60122400  | 2.74514600  |
| H | 2.99030800  | 0.02634700  | 1.74162700  |
| C | -2.92242200 | 1.96474300  | -0.08194900 |
| H | -2.53513200 | 1.47110300  | -0.98020500 |
| H | -2.36820100 | 2.89957900  | 0.04756700  |
| C | -4.39670400 | 2.23170300  | -0.24461100 |
| C | -4.98818700 | 3.39026100  | 0.26261400  |
| C | -5.21015300 | 1.27918600  | -0.86804400 |
| C | -6.36137600 | 3.59810800  | 0.14337200  |
| H | -4.36568400 | 4.13625500  | 0.75058300  |
| C | -6.58131200 | 1.48238300  | -0.98929000 |
| H | -4.75521100 | 0.37305400  | -1.26517500 |
| C | -7.16103000 | 2.64524300  | -0.48293500 |
| H | -6.80605200 | 4.50631900  | 0.53881400  |
| H | -7.19777500 | 0.73593200  | -1.48111800 |
| H | -8.23008800 | 2.80771700  | -0.57836700 |
| C | 2.79597200  | -1.51035700 | -0.44007700 |
| C | 3.53656700  | -2.67225400 | -0.18861600 |
| C | 3.40146900  | -0.45743400 | -1.14234000 |
| C | 4.85998800  | -2.77283600 | -0.60809300 |
| H | 3.06287400  | -3.49313900 | 0.33837100  |
| C | 4.71793000  | -0.56809900 | -1.57207100 |
| H | 2.83648600  | 0.44580000  | -1.34180200 |
| C | 5.45492200  | -1.72157400 | -1.30069300 |
| H | 5.42470900  | -3.67563400 | -0.39639300 |
| H | 5.17036800  | 0.25252500  | -2.11965700 |

|   |             |             |             |
|---|-------------|-------------|-------------|
| H | 6.48601600  | -1.79985900 | -1.63166800 |
| C | -2.76783000 | -1.87535400 | -0.09119500 |
| O | -3.14786600 | -2.07463800 | 1.05031100  |
| O | -3.40215500 | -2.35397600 | -1.16585100 |
| C | -1.10647500 | -1.29991300 | -1.69190400 |
| O | -0.71066800 | -1.45826400 | -2.76124600 |
| O | -0.74750700 | -2.83506100 | 2.15736100  |
| C | -4.54576400 | -3.17945000 | -0.89749000 |
| H | -5.30723600 | -2.60450400 | -0.36772800 |
| H | -4.91351300 | -3.49293400 | -1.87245000 |
| H | -4.25742600 | -4.04668400 | -0.30067000 |
| C | -1.09259200 | -4.21571700 | 2.22619400  |
| H | -1.70512800 | -4.42374700 | 3.10883100  |
| H | -1.63315600 | -4.54403400 | 1.33049400  |
| H | -0.16153500 | -4.78050100 | 2.30166400  |
| C | 2.97545500  | 2.15787300  | 2.03931600  |
| H | 2.23455400  | 2.96653500  | 2.06062700  |
| H | 3.46638100  | 2.14593500  | 3.01784800  |
| C | 3.99686700  | 2.41850000  | 0.95956400  |
| C | 3.64748300  | 3.08020200  | -0.22164700 |
| C | 5.31131600  | 1.96505600  | 1.10591700  |
| C | 4.58861800  | 3.29071700  | -1.22737800 |
| H | 2.62755400  | 3.43349500  | -0.35032600 |
| C | 6.25833600  | 2.17943000  | 0.10727700  |
| H | 5.59461700  | 1.44364100  | 2.01744700  |
| C | 5.89968300  | 2.84593200  | -1.06291200 |
| H | 4.30019500  | 3.80982800  | -2.13666900 |
| H | 7.27615000  | 1.82588200  | 0.24299000  |
| H | 6.63619100  | 3.01690500  | -1.84227800 |
| O | 0.80318800  | -2.68712200 | 0.02658600  |
| H | 0.14996100  | -2.70615100 | 0.77312500  |
| H | -1.57865900 | -2.33661600 | 2.07215000  |

**TS3**

|   |             |             |             |
|---|-------------|-------------|-------------|
| C | 1.59956800  | 1.29785200  | -0.47034600 |
| C | -1.30349900 | 1.49660500  | -0.10534800 |
| C | -0.62814100 | 0.31807400  | 0.30434600  |
| C | 0.83272600  | 0.26570300  | 0.34631300  |
| N | 1.42629200  | -0.69946600 | 0.95954400  |
| N | -1.32150600 | -0.91723600 | 0.50553500  |
| H | -0.64000400 | -1.67082300 | 0.44160500  |
| C | 2.86314800  | -0.85848400 | 0.86159000  |
| H | 3.22854700  | -1.26174200 | 1.81294300  |
| H | 3.38933400  | 0.08888900  | 0.67946500  |
| C | -2.01434600 | -1.03168300 | 1.78493000  |
| H | -1.32325300 | -0.92755800 | 2.64257000  |
| H | -2.74893700 | -0.21856300 | 1.84902500  |
| C | 3.22372500  | -1.85061500 | -0.25747800 |
| H | 2.82761800  | -1.46950300 | -1.20620700 |
| H | 2.72239900  | -2.80291100 | -0.05515400 |
| C | 4.71468900  | -2.04121200 | -0.36197200 |
| C | 5.37010800  | -3.00453000 | 0.41012100  |
| C | 5.47785400  | -1.21218600 | -1.18968100 |
| C | 6.75515700  | -3.14068100 | 0.35337800  |
| H | 4.78590900  | -3.65523300 | 1.05672200  |
| C | 6.86275500  | -1.34500800 | -1.24984400 |
| H | 4.97630200  | -0.46037600 | -1.79576100 |
| C | 7.50541700  | -2.31073700 | -0.47748800 |
| H | 7.24876600  | -3.89761800 | 0.95544800  |
| H | 7.44017500  | -0.69690600 | -1.90222300 |
| H | 8.58458800  | -2.41818400 | -0.52520200 |
| C | -2.72714000 | 1.45310800  | -0.58252600 |
| C | -3.53018600 | 2.56747200  | -0.31779000 |
| C | -3.25498500 | 0.39378800  | -1.33131700 |
| C | -4.84550300 | 2.61768400  | -0.76857900 |
| H | -3.10004700 | 3.39141800  | 0.24231900  |
| C | -4.56365800 | 0.45525100  | -1.80047000 |
| H | -2.63911000 | -0.47293900 | -1.53930600 |
| C | -5.36472000 | 1.55988100  | -1.51245900 |
| H | -5.46273600 | 3.48296400  | -0.54625500 |

|   |             |             |             |
|---|-------------|-------------|-------------|
| H | -4.96008200 | -0.36528300 | -2.38985500 |
| H | -6.38900400 | 1.59701400  | -1.87136700 |
| C | 2.06098600  | 2.57459400  | 0.06445700  |
| O | 1.90434200  | 2.93925400  | 1.21556600  |
| O | 2.69883000  | 3.30750400  | -0.85509000 |
| C | 1.80935400  | 1.05678300  | -1.75746600 |
| O | 1.98615200  | 0.82216300  | -2.87757700 |
| O | -0.39640300 | 2.07643900  | 2.45193200  |
| C | 3.15169000  | 4.59403800  | -0.41659700 |
| H | 3.87348100  | 4.48726500  | 0.39530300  |
| H | 3.62264200  | 5.05086900  | -1.28518000 |
| H | 2.30732600  | 5.19803100  | -0.07952500 |
| C | 0.60690900  | 1.77897400  | 3.46410600  |
| H | 0.09589800  | 1.19912300  | 4.23066600  |
| H | 1.42916800  | 1.22350700  | 3.01807700  |
| H | 0.94732400  | 2.73125200  | 3.86303100  |
| C | -2.74420500 | -2.37207400 | 1.88689600  |
| H | -2.00985600 | -3.18090900 | 1.78900100  |
| H | -3.18283500 | -2.45408800 | 2.88681900  |
| C | -3.81920600 | -2.52567900 | 0.83892700  |
| C | -3.54457900 | -3.13327600 | -0.38974300 |
| C | -5.10835800 | -2.03693600 | 1.06792200  |
| C | -4.53630600 | -3.26388700 | -1.35929000 |
| H | -2.54375100 | -3.51125200 | -0.58296900 |
| C | -6.10469600 | -2.16539100 | 0.10240200  |
| H | -5.33421400 | -1.55697000 | 2.01755800  |
| C | -5.82256600 | -2.78576900 | -1.11277500 |
| H | -4.30643800 | -3.74488500 | -2.30552000 |
| H | -7.10203100 | -1.78444500 | 0.30122000  |
| H | -6.59844100 | -2.89267800 | -1.86498300 |
| O | -0.77883000 | 2.64512300  | 0.03929700  |
| H | -0.08144900 | 2.63734500  | 1.66759900  |
| H | -0.63548300 | 1.23827500  | 1.90624900  |

**IM4**

|   |             |             |             |
|---|-------------|-------------|-------------|
| C | -1.08887600 | 1.98950100  | 0.22270600  |
| C | 1.61887300  | 1.07083300  | 0.53253800  |
| C | 0.98359300  | 1.01334400  | -0.87057500 |
| C | -0.53420800 | 0.96779300  | -0.72380100 |
| N | -1.17957100 | 0.08443300  | -1.36368000 |
| N | 1.48979700  | -0.11131500 | -1.61636500 |
| H | 0.84235000  | -0.34311500 | -2.36530700 |
| C | -2.61906900 | -0.05008700 | -1.27527000 |
| H | -2.99852300 | -0.21371300 | -2.28933800 |
| H | -3.11882500 | 0.84494000  | -0.87710900 |
| C | 2.84447700  | 0.09994500  | -2.10787100 |
| H | 2.89371300  | 0.83834700  | -2.92424300 |
| H | 3.44325500  | 0.51402100  | -1.28705300 |
| C | -2.97315800 | -1.27811500 | -0.42014500 |
| H | -2.60183300 | -1.13076600 | 0.60109800  |
| H | -2.44790900 | -2.14559300 | -0.83258200 |
| C | -4.46198200 | -1.51973500 | -0.40779000 |
| C | -5.05899800 | -2.31399600 | -1.39092400 |
| C | -5.27692700 | -0.91187300 | 0.55093700  |
| C | -6.43875000 | -2.50161500 | -1.41305000 |
| H | -4.43337600 | -2.79207500 | -2.14104600 |
| C | -6.65727700 | -1.09703800 | 0.53238200  |
| H | -4.82397600 | -0.29237100 | 1.32150000  |
| C | -7.24185900 | -1.89321800 | -0.45030400 |
| H | -6.88665700 | -3.12605600 | -2.18009500 |
| H | -7.27576800 | -0.62172600 | 1.28761900  |
| H | -8.31716100 | -2.04116500 | -0.46431300 |
| C | 1.64505900  | -0.14538000 | 1.40040700  |
| C | 2.33568600  | -0.05309900 | 2.61505800  |
| C | 0.96167100  | -1.32693200 | 1.07920800  |
| C | 2.34249600  | -1.12174700 | 3.50246000  |
| H | 2.85721500  | 0.86899700  | 2.84937500  |
| C | 0.95206700  | -2.38497300 | 1.98317200  |
| H | 0.45381000  | -1.41917300 | 0.12689100  |
| C | 1.64292000  | -2.28704100 | 3.18959000  |

|   |             |             |             |
|---|-------------|-------------|-------------|
| H | 2.88434000  | -1.04557600 | 4.43979000  |
| H | 0.41689000  | -3.29621500 | 1.73521200  |
| H | 1.64059600  | -3.12161400 | 3.88446400  |
| C | -0.61212400 | 3.38638600  | 0.27002200  |
| O | 0.12632300  | 3.89331600  | -0.54341300 |
| O | -1.12116700 | 4.03270900  | 1.32512400  |
| C | -1.95752700 | 1.62969500  | 1.16716200  |
| O | -2.70314100 | 1.30962100  | 1.98723600  |
| O | 3.04180200  | 3.55767600  | -1.35699500 |
| C | -0.72390600 | 5.40474700  | 1.45843300  |
| H | -1.02842700 | 5.97515600  | 0.57923600  |
| H | -1.23414200 | 5.77179400  | 2.34683900  |
| H | 0.35822600  | 5.47158400  | 1.58424700  |
| C | 2.42581500  | 4.19052500  | -2.45502800 |
| H | 3.17246100  | 4.26333900  | -3.25114900 |
| H | 1.56738000  | 3.62511100  | -2.84384000 |
| H | 2.07877900  | 5.20445000  | -2.21710000 |
| C | 3.45209700  | -1.22974800 | -2.55283100 |
| H | 2.86872200  | -1.63334100 | -3.38861500 |
| H | 4.46435700  | -1.04241300 | -2.92906500 |
| C | 3.49242900  | -2.23979100 | -1.42946200 |
| C | 2.71689400  | -3.39969400 | -1.47127400 |
| C | 4.29931400  | -2.01763600 | -0.30799900 |
| C | 2.75943700  | -4.32801200 | -0.43186700 |
| H | 2.07683600  | -3.57923100 | -2.33175000 |
| C | 4.33864100  | -2.93581000 | 0.73709900  |
| C | 4.90505700  | -1.11543200 | -0.25567800 |
| C | 3.57401700  | -4.10038700 | 0.67403100  |
| H | 2.15343400  | -5.22776800 | -0.48631300 |
| H | 4.96820700  | -2.74395500 | 1.60105100  |
| H | 3.60565400  | -4.81858800 | 1.48798100  |
| O | 2.06464400  | 2.13088300  | 0.93822700  |
| H | 2.39867500  | 3.48499300  | -0.63544300 |
| H | 1.23242000  | 1.98062900  | -1.32843900 |

**IM5**

|   |             |             |             |
|---|-------------|-------------|-------------|
| C | -0.89295100 | -1.48916700 | 0.26743800  |
| C | 1.07317600  | 1.35407600  | -1.32109500 |
| C | 0.71694200  | -0.14296200 | -1.23672700 |
| C | -0.66628300 | -0.29140000 | -0.59827400 |
| N | -1.50978500 | 0.61563000  | -0.86407400 |
| N | 1.70492200  | -0.92649900 | -0.49467600 |
| H | 1.62154400  | -1.89308100 | -0.80737400 |
| C | -2.83045100 | 0.67306300  | -0.27297600 |
| H | -2.90414100 | 1.64285300  | 0.23489700  |
| H | -3.01460500 | -0.10642200 | 0.47554600  |
| C | 3.10172800  | -0.52629200 | -0.68624000 |
| H | 3.39408000  | -0.51997600 | -1.74820400 |
| H | 3.23361900  | 0.49349400  | -0.30811500 |
| C | -3.90171700 | 0.61056200  | -1.36977900 |
| H | -3.74252800 | -0.30409600 | -1.94647200 |
| H | -3.77044100 | 1.46598500  | -2.03987200 |
| C | -5.28396100 | 0.61038900  | -0.76753900 |
| C | -6.00056100 | 1.79719500  | -0.59576000 |
| C | -5.84930400 | -0.58754200 | -0.31715200 |
| C | -7.25751400 | 1.78921300  | 0.00639800  |
| C | -5.56981600 | 2.73385800  | -0.94175500 |
| C | -7.10475600 | -0.59941500 | 0.28442400  |
| C | -5.28941500 | -1.51132800 | -0.44711500 |
| C | -7.81304400 | 0.59047600  | 0.44792700  |
| H | -7.80390500 | 2.71973600  | 0.12817500  |
| H | -7.53300800 | -1.53786000 | 0.62414600  |
| H | -8.79324700 | 0.58256900  | 0.91458700  |
| C | 1.10879900  | 2.19867100  | -0.08295500 |
| C | 1.15912600  | 3.58643300  | -0.24535600 |
| C | 1.11247400  | 1.65334600  | 1.20510600  |
| C | 1.19953000  | 4.42047100  | 0.86549400  |
| C | 1.16083800  | 3.99371400  | -1.25093800 |
| H | 1.16412800  | 2.48957700  | 2.31613400  |
| H | 1.10418400  | 0.57603100  | 1.33998400  |

|   |             |             |             |
|---|-------------|-------------|-------------|
| C | 1.20181900  | 3.87242600  | 2.14784500  |
| H | 1.22980600  | 5.49726200  | 0.73346400  |
| H | 1.17389500  | 2.06125300  | 3.31318300  |
| H | 1.23441900  | 4.52318100  | 3.01620100  |
| C | -0.00670800 | -1.87633800 | 1.19447400  |
| O | 0.65163000  | -2.26478800 | 2.05905700  |
| C | -2.05423700 | -2.37796800 | 0.09038300  |
| O | -2.86790500 | -2.27917400 | -0.80064000 |
| O | -2.08940200 | -3.33807300 | 1.02791800  |
| C | -3.16866300 | -4.27257900 | 0.91023000  |
| H | -3.14334800 | -4.76681400 | -0.06258900 |
| H | -3.01843000 | -4.99662300 | 1.70902200  |
| H | -4.12627800 | -3.76301200 | 1.03662300  |
| C | 4.01608800  | -1.46402500 | 0.10161000  |
| H | 3.69714500  | -1.45623000 | 1.14953100  |
| H | 3.89397200  | -2.48737600 | -0.27255200 |
| C | 5.45979800  | -1.04147100 | -0.01160800 |
| C | 6.29553400  | -1.59164000 | -0.98654400 |
| C | 5.97145700  | -0.04686600 | 0.82755200  |
| C | 7.61468700  | -1.16291300 | -1.11839700 |
| H | 5.90815400  | -2.36525200 | -1.64528600 |
| C | 7.28890200  | 0.38458600  | 0.69924800  |
| H | 5.32813600  | 0.38915200  | 1.58859700  |
| C | 8.11491200  | -0.17358000 | -0.27499600 |
| H | 8.25229100  | -1.60348700 | -1.87886300 |
| H | 7.67200900  | 1.15505300  | 1.36147900  |
| H | 9.14308500  | 0.16007000  | -0.37475900 |
| O | 1.31080900  | 1.83631900  | -2.40848600 |
| H | 0.64127600  | -0.45879300 | -2.28626800 |

**TS4**

|   |             |             |             |
|---|-------------|-------------|-------------|
| C | -0.81792600 | -1.51326400 | 0.11202400  |
| C | 1.05545600  | 1.39173000  | -1.41614600 |
| C | 0.69929000  | -0.10843900 | -1.40496900 |
| C | -0.66589600 | -0.30067500 | -0.73788400 |
| N | -1.52477700 | 0.60579300  | -0.95573600 |
| N | 1.69589900  | -0.94546700 | -0.73441300 |
| H | 1.67505000  | -1.86160300 | -1.18038900 |
| C | -2.81652400 | 0.65653900  | -0.30307400 |
| H | -2.86915400 | 1.62754500  | 0.20572000  |
| H | -2.96082700 | -0.12118900 | 0.45544500  |
| C | 3.08631100  | -0.47836700 | -0.76459500 |
| H | 3.45351200  | -0.33781900 | -1.79260500 |
| H | 3.14813600  | 0.49160800  | -0.26114800 |
| C | -3.94179500 | 0.58878100  | -1.34370000 |
| H | -3.81623800 | -0.33239500 | -1.91817300 |
| H | -3.83984200 | 1.43701100  | -2.02804200 |
| C | -5.29287500 | 0.60377400  | -0.67457400 |
| C | -6.00058100 | 1.79494800  | -0.49597000 |
| C | -5.83575800 | -0.58281700 | -0.16952100 |
| C | -7.22726600 | 1.80235200  | 0.16561900  |
| H | -5.58682500 | 2.72291000  | -0.88365200 |
| C | -7.06109800 | -0.57930300 | 0.49119200  |
| H | -5.28177000 | -1.50955900 | -0.30334500 |
| C | -7.76111200 | 0.61471600  | 0.66057300  |
| H | -7.76710400 | 2.73610700  | 0.29198700  |
| H | -7.47242000 | -1.50909700 | 0.87304400  |
| H | -8.71780600 | 0.61859500  | 1.17375400  |
| C | 1.06237500  | 2.18383200  | -0.14360800 |
| C | 1.10595800  | 3.57728100  | -0.24437000 |
| C | 1.05015600  | 1.58298200  | 1.11919200  |
| C | 1.12473300  | 4.36170000  | 0.90287600  |
| H | 1.12005900  | 4.02864200  | -1.23082700 |
| C | 1.08086800  | 2.36856100  | 2.26682000  |
| H | 1.04266800  | 0.50072100  | 1.20993700  |
| C | 1.11232000  | 3.75787900  | 2.15961000  |
| H | 1.15013700  | 5.44339100  | 0.81884800  |
| H | 1.07842800  | 1.89648400  | 3.24383200  |
| H | 1.12853900  | 4.36985600  | 3.05608500  |
| C | 0.18605900  | -1.96933500 | 0.88381500  |

|   |             |             |             |
|---|-------------|-------------|-------------|
| O | 0.87898800  | -2.46776400 | 1.66308800  |
| C | -2.00467900 | -2.38352200 | 0.05314900  |
| O | -2.90141700 | -2.27383600 | -0.75399400 |
| O | -1.96224300 | -3.34827500 | 0.98581400  |
| C | -3.05005500 | -4.27876000 | 0.95567800  |
| H | -3.10638800 | -4.77185300 | -0.01657700 |
| H | -2.83737000 | -5.00459600 | 1.73858600  |
| H | -3.99295400 | -3.76711100 | 1.16011800  |
| C | 3.97616300  | -1.47579000 | -0.02276500 |
| H | 3.58644100  | -1.59803400 | 0.99344300  |
| H | 3.91755300  | -2.45219400 | -0.51798700 |
| C | 5.40717800  | -1.00031300 | 0.01928000  |
| C | 6.33274500  | -1.41693900 | -0.94047000 |
| C | 5.81693400  | -0.08711800 | 0.99579100  |
| C | 7.64103400  | -0.93782300 | -0.92306800 |
| H | 6.02450800  | -2.12608700 | -1.70498400 |
| C | 7.12300500  | 0.39438200  | 1.01662500  |
| H | 5.10297700  | 0.24502200  | 1.74629900  |
| C | 8.03951600  | -0.03093600 | 0.05632900  |
| H | 8.34953100  | -1.27501600 | -1.67357600 |
| H | 7.42669000  | 1.09973500  | 1.78416300  |
| H | 9.05907500  | 0.34133100  | 0.07288500  |
| O | 1.31480200  | 1.91922900  | -2.47722000 |
| H | 0.59928500  | -0.36587200 | -2.46646800 |

**IM6**

|   |             |             |             |
|---|-------------|-------------|-------------|
| C | -0.62660200 | -1.44246500 | -0.42391200 |
| C | 0.99873700  | 1.66693500  | -1.52065100 |
| C | 0.53726400  | 0.21221100  | -1.74160100 |
| C | -0.76836600 | -0.12967400 | -1.02600600 |
| N | -1.63571600 | 0.80497600  | -1.04015000 |
| N | 1.51486300  | -0.85348400 | -1.34502700 |
| H | 1.79272300  | -1.35523000 | -2.19516900 |
| C | -2.86787400 | 0.72741100  | -0.27867900 |
| H | -2.99487500 | 1.69918900  | 0.21577400  |
| H | -2.84726600 | -0.04167300 | 0.50060200  |
| C | 2.79053400  | -0.45195000 | -0.65046200 |
| H | 3.09307900  | 0.52322600  | -1.03923600 |
| C | 2.57205900  | -0.35331900 | 0.41494500  |
| C | -4.07459700 | 0.49288600  | -1.19698900 |
| H | -3.92964200 | -0.46674400 | -1.70033900 |
| H | -4.09766000 | 1.28185400  | -1.95608400 |
| C | -5.36295300 | 0.48087700  | -0.41267500 |
| C | -6.20710500 | 1.59371700  | -0.38616700 |
| C | -5.70927000 | -0.64259000 | 0.34762400  |
| C | -7.37571700 | 1.58584200  | 0.37391000  |
| H | -5.94646000 | 2.47276400  | -0.97089800 |
| C | -6.87566900 | -0.65350700 | 1.10721000  |
| H | -5.04855400 | -1.50654800 | 0.33290800  |
| C | -7.71372600 | 0.46128800  | 1.12261300  |
| H | -8.02247800 | 2.45830500  | 0.37928300  |
| H | -7.13369900 | -1.53423700 | 1.68817500  |
| H | -8.62430400 | 0.45224300  | 1.71388400  |
| C | 1.08112000  | 2.28501200  | -0.16037800 |
| C | 1.53342400  | 3.60853600  | -0.09784100 |
| C | 0.75572000  | 1.61423000  | 1.02467200  |
| C | 1.65899900  | 4.25215000  | 1.12645900  |
| H | 1.78209000  | 4.11852800  | -1.02215200 |
| C | 0.88714000  | 2.25969300  | 2.24995200  |
| H | 0.39810900  | 0.58994100  | 1.01042000  |
| C | 1.33609400  | 3.57751100  | 2.30303000  |
| H | 2.00910200  | 5.27849300  | 1.16472500  |
| H | 0.63232700  | 1.73223700  | 3.16316600  |
| H | 1.43370300  | 4.07871500  | 3.26093500  |
| C | 0.68875400  | -1.92507200 | -0.49646100 |
| O | 1.31378900  | -2.89021200 | -0.13672800 |
| C | -1.71131700 | -2.31974900 | 0.00872200  |
| O | -2.87485500 | -2.22253100 | -0.34161300 |
| O | -1.29302900 | -3.30553400 | 0.81910200  |
| C | -2.29583500 | -4.25120800 | 1.18916300  |



|   |             |             |             |
|---|-------------|-------------|-------------|
| H | -2.72840200 | -4.72579900 | 0.30543700  |
| H | -1.79004300 | -4.99294600 | 1.80611700  |
| H | -3.09253200 | -3.76692300 | 1.75896000  |
| C | 3.90553400  | -1.46526000 | -0.90234700 |
| H | 3.59443000  | -2.44824300 | -0.54538700 |
| H | 4.08529200  | -1.53141700 | -1.98214500 |
| C | 5.15983300  | -1.01286700 | -0.19343200 |
| C | 6.06258800  | -0.14914000 | -0.81877600 |
| C | 5.40630900  | -1.41258600 | 1.12259400  |
| C | 7.19500900  | 0.30142900  | -0.14470900 |
| H | 5.87860500  | 0.16629000  | -1.84315800 |
| C | 6.53723500  | -0.96312600 | 1.79932600  |
| H | 4.70671200  | -2.08393100 | 1.61481400  |
| C | 7.43449300  | -0.10506800 | 1.16632600  |
| H | 7.89152000  | 0.96784600  | -0.64409600 |
| H | 6.71930300  | -1.28513000 | 2.81998400  |
| H | 8.31801000  | 0.24349100  | 1.69185900  |
| O | 1.29477300  | 2.30176100  | -2.51210300 |
| H | 0.39086400  | 0.12788500  | -2.81944000 |

**TS5**

|   |             |             |             |
|---|-------------|-------------|-------------|
| C | 0.52361500  | 1.86230000  | -0.75615900 |
| C | 0.20492000  | -1.56650300 | -1.51554600 |
| C | -0.34473800 | 0.02042500  | -2.03686500 |
| C | 0.70713500  | 0.52471300  | -1.14352700 |
| N | 1.33987200  | -0.57879700 | -0.87388900 |
| N | -1.47071800 | 0.97361200  | -1.80506600 |
| H | -1.91426400 | 1.23941300  | -2.68996600 |
| C | 2.54903400  | -0.85929500 | -0.13060900 |
| H | 2.57160000  | -1.94033500 | 0.04055700  |
| H | 2.50881200  | -0.34950000 | 0.83725900  |
| C | -2.54114300 | 0.48006900  | -0.86912400 |
| H | -2.74378100 | -0.55625800 | -1.14838400 |
| H | -2.11046300 | 0.48263100  | 0.13493700  |
| C | 3.79777300  | -0.41116400 | -0.89942900 |
| H | 3.68427900  | 0.65452700  | -1.12318600 |
| H | 3.84884100  | -0.95982300 | -1.84509100 |
| C | 5.04223800  | -0.63564100 | -0.07865400 |
| C | 5.85233500  | -1.75495100 | -0.28081400 |
| C | 5.37352600  | 0.26349000  | 0.94117700  |
| C | 6.97728300  | -1.97046400 | 0.51345300  |
| H | 5.60044600  | -2.45938000 | -1.06979000 |
| C | 6.49590900  | 0.04997600  | 1.73631400  |
| H | 4.73962200  | 1.13322000  | 1.10063500  |
| C | 7.30172200  | -1.06828600 | 1.52373500  |
| H | 7.60069400  | -2.84272200 | 0.34130900  |
| H | 6.74464700  | 0.75754800  | 2.52162500  |
| H | 8.17868000  | -1.23416500 | 2.14185600  |
| C | -0.64762000 | -2.08800900 | -0.35954100 |
| C | -1.53422200 | -3.11998400 | -0.67755000 |
| C | -0.64497900 | -1.57155500 | 0.93864500  |
| C | -2.44048200 | -3.59252000 | 0.26707300  |
| H | -1.50231600 | -3.53140300 | -1.68145500 |
| C | -1.54601000 | -2.05163900 | 1.88841600  |
| H | 0.04814300  | -0.78251700 | 1.21712900  |
| C | -2.45485700 | -3.05199200 | 1.55243000  |
| H | -3.13530600 | -4.38388300 | 0.00224100  |
| H | -1.53793700 | -1.63940000 | 2.89289100  |
| H | -3.16449200 | -3.41415500 | 2.28974000  |
| C | -0.77016500 | 2.27669500  | -1.19990000 |
| O | -1.42365600 | 3.27986800  | -1.15984700 |
| C | 1.41760700  | 2.62472800  | 0.10265900  |
| O | 2.45824300  | 2.18259400  | 0.55787200  |
| O | 0.98556700  | 3.86802300  | 0.34285300  |
| C | 1.83175100  | 4.65077000  | 1.18843500  |
| H | 2.82154300  | 4.76621700  | 0.74163800  |
| H | 1.34294300  | 5.61943600  | 1.28021900  |
| H | 1.93393500  | 4.18306700  | 2.17009900  |
| H | -3.82131700 | 1.30755900  | -0.92625300 |
| H | -3.61976700 | 2.34195500  | -0.64094700 |

|            |             |             |             |
|------------|-------------|-------------|-------------|
| H          | -4.20984200 | 1.30584500  | -1.95125700 |
| C          | -4.82321900 | 0.68087500  | 0.01591900  |
| C          | -5.61093100 | -0.39619900 | -0.39937200 |
| C          | -4.91995300 | 1.11805600  | 1.33906700  |
| C          | -6.48375300 | -1.02021700 | 0.48808100  |
| H          | -5.53881400 | -0.74612100 | -1.42658100 |
| C          | -5.79227600 | 0.49605900  | 2.22932100  |
| H          | -4.30726300 | 1.95283900  | 1.67066100  |
| C          | -6.57583300 | -0.57509900 | 1.80550500  |
| H          | -7.09257700 | -1.85342500 | 0.15080000  |
| H          | -5.86028600 | 0.84895800  | 3.25376500  |
| H          | -7.25680500 | -1.05976700 | 2.49810200  |
| O          | 0.55639300  | -2.34075000 | -2.41673700 |
| H          | -0.06681500 | 0.05243500  | -3.09056400 |
| <b>IM7</b> |             |             |             |
| C          | -0.54796700 | -1.15472600 | 0.11159300  |
| C          | -0.88577500 | 2.39651500  | 0.44968500  |
| C          | 0.18739300  | 0.33746600  | -1.50832400 |
| C          | -0.65399900 | 0.17148700  | -0.47340500 |
| N          | -1.46008000 | 1.22729800  | -0.00029500 |
| N          | 1.04711200  | -0.83095900 | -1.60161100 |
| H          | 1.04641500  | -1.25873200 | -2.53457800 |
| C          | -2.92983700 | 1.16381600  | -0.04433500 |
| H          | -3.28219600 | 2.14313200  | -0.37721300 |
| H          | -3.30007800 | 0.98684300  | 0.96918600  |
| C          | 2.45925200  | -0.46309700 | -1.21823000 |
| H          | 2.73572300  | 0.38963900  | -1.84442800 |
| H          | 2.40255900  | -0.12405400 | -0.17904200 |
| C          | -3.45759000 | 0.07824000  | -0.97998400 |
| H          | -3.05056600 | -0.89395200 | -0.68693600 |
| H          | -3.13336700 | 0.28179700  | -2.00606600 |
| C          | -4.96382800 | 0.02828300  | -0.90100600 |
| C          | -5.76561100 | 0.63964200  | -1.86649700 |
| C          | -5.57871900 | -0.60458000 | 0.18455100  |
| C          | -7.15490900 | 0.61463800  | -1.75581700 |
| H          | -5.29652200 | 1.13636900  | -2.71234500 |
| C          | -6.96534100 | -0.63015100 | 0.29912700  |
| C          | -4.95529200 | -1.07754400 | 0.94071000  |
| C          | -7.75787600 | -0.02039000 | -0.67290300 |
| H          | -7.76577800 | 1.09104500  | -2.51669700 |
| H          | -7.42884700 | -1.12750500 | 1.14577500  |
| H          | -8.83978600 | -0.04146200 | -0.58605400 |
| C          | 0.56319100  | 2.32239400  | 0.84848200  |
| C          | 1.47154500  | 3.25748500  | 0.35405500  |
| C          | 0.97724200  | 1.36373500  | 1.77711100  |
| C          | 2.80653400  | 3.20006600  | 0.74587700  |
| H          | 1.13146000  | 4.01528800  | -0.34564700 |
| C          | 2.30692000  | 1.32846400  | 2.18964200  |
| H          | 0.25246200  | 0.65716700  | 2.17385900  |
| C          | 3.22590000  | 2.23448200  | 1.66061100  |
| H          | 3.51968100  | 3.91180900  | 0.34218400  |
| H          | 2.62706500  | 0.58991600  | 2.91823300  |
| H          | 4.26661400  | 2.19324600  | 1.96663800  |
| C          | 0.42895800  | -1.89048400 | -0.57505500 |
| O          | 0.89582700  | -3.00302900 | -0.59247600 |
| C          | -1.29754900 | -1.61875400 | 1.25556500  |
| O          | -2.11293500 | -0.95111600 | 1.87627700  |
| O          | -1.00334900 | -2.88807900 | 1.59848900  |
| C          | -1.71052700 | -3.38279000 | 2.73338600  |
| H          | -2.78834600 | -3.37830300 | 2.55318800  |
| H          | -1.35921800 | -4.40357700 | 2.88012200  |
| H          | -1.49753000 | -2.77966500 | 3.61922300  |
| C          | 3.46816700  | -1.59450100 | -1.38829900 |
| H          | 3.18680800  | -2.44413900 | -0.76418500 |
| H          | 3.47374000  | -1.92856700 | -2.43163500 |
| C          | 4.83112800  | -1.07423200 | -0.99459500 |
| C          | 5.71843100  | -0.58065500 | -1.95330900 |
| C          | 5.19806300  | -1.02466800 | 0.35387700  |
| C          | 6.95213100  | -0.05487500 | -1.57514600 |

|            |             |             |             |
|------------|-------------|-------------|-------------|
| H          | 5.44160100  | -0.61396400 | -3.00429400 |
| C          | 6.42909200  | -0.49810300 | 0.73537700  |
| H          | 4.51216000  | -1.40683500 | 1.10666000  |
| C          | 7.30977500  | -0.01172800 | -0.22962700 |
| H          | 7.63440300  | 0.31964300  | -2.33210200 |
| H          | 6.70281900  | -0.47105700 | 1.78573900  |
| H          | 8.27117700  | 0.39621000  | 0.06625900  |
| O          | -1.53000700 | 3.42362900  | 0.59195000  |
| H          | 0.40216900  | 1.21376200  | -2.10158800 |
| <b>TS6</b> |             |             |             |
| C          | -0.40444600 | -0.32824400 | 1.12287000  |
| C          | -1.58885600 | 2.56476700  | -0.72891200 |
| C          | 0.53086200  | 0.38520100  | -0.86037400 |
| C          | -0.58549900 | 0.46103400  | -0.03067400 |
| N          | -1.70850500 | 1.22938900  | -0.38283000 |
| N          | 1.49109300  | -0.50497300 | -0.14696700 |
| C          | -3.02715700 | 0.59977000  | -0.60005200 |
| H          | -3.47603100 | 1.11825800  | -1.44910100 |
| H          | -3.64801600 | 0.76926100  | 0.28211600  |
| C          | 2.94519000  | -0.48725900 | -0.34600600 |
| H          | 3.16619600  | 0.19868300  | -1.16729600 |
| H          | 3.38460900  | -0.08451100 | 0.57173600  |
| C          | -2.95062700 | -0.89560600 | -0.90119700 |
| H          | -2.46411700 | -1.42283400 | -0.07608300 |
| H          | -2.35337500 | -1.06074500 | -1.80461900 |
| C          | -4.34478400 | -1.44478900 | -1.08238600 |
| C          | -4.89065000 | -1.64291500 | -2.35198700 |
| C          | -5.13061400 | -1.72290000 | 0.04085500  |
| C          | -6.19285800 | -2.11758600 | -2.49907800 |
| H          | -4.28882300 | -1.42577000 | -3.23114000 |
| C          | -6.43179900 | -2.19541900 | -0.10220700 |
| C          | -4.70979300 | -1.56430200 | 1.03162700  |
| C          | -6.96616700 | -2.39544900 | -1.37452700 |
| H          | -6.60249800 | -2.27094100 | -3.49290900 |
| H          | -7.02885600 | -2.41023500 | 0.77889600  |
| H          | -7.98002900 | -2.76656900 | -1.48785200 |
| C          | -0.35285800 | 3.29699600  | -0.28964300 |
| C          | 0.21651900  | 4.21298100  | -1.17559000 |
| C          | 0.17161300  | 3.15079500  | 0.99736100  |
| C          | 1.33586400  | 4.94625700  | -0.79358400 |
| H          | -0.22249400 | 4.34051200  | -2.16024700 |
| C          | 1.27868900  | 3.90041000  | 1.38286700  |
| H          | -0.29660000 | 2.46562300  | 1.69795200  |
| C          | 1.86889200  | 4.78852800  | 0.48470700  |
| H          | 1.78739500  | 5.64586700  | -1.48973900 |
| H          | 1.67889700  | 3.79268500  | 2.38586900  |
| H          | 2.73840700  | 5.36496400  | 0.78474000  |
| C          | 0.91643600  | -0.90729400 | 1.11614600  |
| O          | 1.55813400  | -1.59382600 | 1.89525800  |
| C          | -1.37857900 | -0.45672500 | 2.20351400  |
| O          | -2.48475000 | 0.05468900  | 2.20666100  |
| O          | -0.92716700 | -1.20118800 | 3.22173400  |
| C          | -1.83887200 | -1.34972200 | 4.31023100  |
| H          | -2.75662000 | -1.84317700 | 3.98135000  |
| H          | -1.32298200 | -1.96506700 | 5.04599500  |
| H          | -2.09178000 | -0.37765200 | 4.73948100  |
| C          | 3.48827400  | -1.88752200 | -0.63370400 |
| H          | 3.16304200  | -2.55004200 | 0.17288000  |
| H          | 3.05606100  | -2.25175100 | -1.57207000 |
| C          | 4.99400400  | -1.85997500 | -0.72237700 |
| C          | 5.64187100  | -1.74431300 | -1.95435800 |
| C          | 5.76467400  | -1.89788900 | 0.44389700  |
| C          | 7.03185100  | -1.67379500 | -2.02243600 |
| H          | 5.05135100  | -1.71557600 | -2.86700000 |
| C          | 7.15335000  | -1.82615500 | 0.37980800  |
| H          | 5.26635100  | -1.98942900 | 1.40635100  |
| C          | 7.79063200  | -1.71407200 | -0.85502100 |
| H          | 7.52190800  | -1.58954300 | -2.98761600 |
| H          | 7.73895700  | -1.86151100 | 1.29334900  |

|    |             |             |             |
|----|-------------|-------------|-------------|
| H  | 8.87365600  | -1.66156100 | -0.90662400 |
| O  | -2.47655900 | 3.15380700  | -1.32401900 |
| H  | 0.90393400  | 1.06362300  | -1.61361300 |
| H  | 0.80613700  | -0.88169500 | -1.10378000 |
| PC |             |             |             |
| C  | -0.47368900 | -0.08048900 | 1.49044500  |
| C  | -1.56278200 | 2.47047900  | -0.93945000 |
| C  | 0.84048700  | 0.72420500  | -0.27170200 |
| C  | -0.51687400 | 0.71298900  | 0.39812200  |
| N  | -1.63403100 | 1.28483900  | -0.20865400 |
| N  | 1.64158600  | -0.07170600 | 0.62263300  |
| C  | -2.81935600 | 0.43789700  | -0.41897600 |
| H  | -3.62903000 | 1.09331400  | -0.74017500 |
| H  | -3.10551600 | -0.00298300 | 0.53599000  |
| C  | 3.04530000  | -0.34651700 | 0.41576800  |
| H  | 3.53093800  | 0.56082000  | 0.03996900  |
| H  | 3.47741700  | -0.58592100 | 1.39128100  |
| C  | -2.56698400 | -0.65008600 | -1.46738800 |
| H  | -1.65609300 | -1.19862400 | -1.19826000 |
| H  | -2.40250500 | -0.17692800 | -2.44023400 |
| C  | -3.73248200 | -1.60531800 | -1.52414200 |
| C  | -4.71814800 | -1.48952000 | -2.50629800 |
| C  | -3.86892500 | -2.59574200 | -0.54533400 |
| C  | -5.81372700 | -2.35106200 | -2.51760100 |
| H  | -4.62298600 | -0.71973100 | -3.26810900 |
| C  | -4.96175800 | -3.45729200 | -0.55300500 |
| H  | -3.10612100 | -2.68902300 | 0.22590100  |
| C  | -5.93796000 | -3.33677500 | -1.54150400 |
| H  | -6.57016000 | -2.25164900 | -3.29019800 |
| H  | -5.05142800 | -4.22432000 | 0.21027200  |
| H  | -6.79020500 | -4.00910800 | -1.55065700 |
| C  | -0.58299300 | 3.49641100  | -0.46639500 |
| C  | 0.01250900  | 4.32962100  | -1.41530700 |
| C  | -0.31039400 | 3.66892300  | 0.89426800  |
| C  | 0.91120600  | 5.30958600  | -1.00800400 |
| H  | -0.23052900 | 4.19515100  | -2.46460000 |
| C  | 0.57702600  | 4.66187700  | 1.29754700  |
| C  | -0.80404400 | 3.04052100  | 1.63041900  |
| H  | 1.19511400  | 5.47355400  | 0.34762400  |
| H  | 1.38735600  | 5.94803400  | -1.74505800 |
| H  | 0.78378300  | 4.80354100  | 2.35328200  |
| H  | 1.89377300  | 6.24122100  | 0.66507500  |
| C  | 0.91771000  | -0.60584400 | 1.65336300  |
| O  | 1.35946800  | -1.33130100 | 2.52729100  |
| O  | -1.56955600 | -0.30464900 | 2.45652900  |
| O  | -2.42131700 | 0.52030600  | 2.71373900  |
| O  | -1.52038800 | -1.51557700 | 3.00956300  |
| C  | -2.54353600 | -1.78514300 | 3.97443300  |
| H  | -3.52955500 | -1.73419400 | 3.50693600  |
| H  | -2.34710300 | -2.79168300 | 4.33939300  |
| H  | -2.49468500 | -1.06580300 | 4.79427200  |
| C  | 3.27849100  | -1.51367600 | -0.55537300 |
| H  | 2.78612000  | -2.40237100 | -0.14657200 |
| H  | 2.80666500  | -1.28275200 | -1.51680100 |
| C  | 4.75167000  | -1.77057400 | -0.74798900 |
| C  | 5.45459100  | -1.16172400 | -1.79122700 |
| C  | 5.45348500  | -2.57775000 | 0.15264800  |
| C  | 6.82571300  | -1.35986600 | -1.93777500 |
| H  | 4.91896400  | -0.53187200 | -2.49777100 |
| C  | 6.82400900  | -2.77827100 | 0.00987600  |
| H  | 4.91588100  | -3.05529700 | 0.96855300  |
| C  | 7.51411500  | -2.16964200 | -1.03702000 |
| H  | 7.35574100  | -0.88397100 | -2.75728100 |
| H  | 7.35314300  | -3.41250800 | 0.71466100  |
| H  | 8.58198400  | -2.32786300 | -1.15139100 |
| O  | -2.32223200 | 2.68900400  | -1.86572300 |
| H  | 1.25722300  | 1.72912700  | -0.39428300 |
| H  | 0.74027200  | 0.26987300  | -1.26822300 |

## 12. The Photophysical properties of **6a**

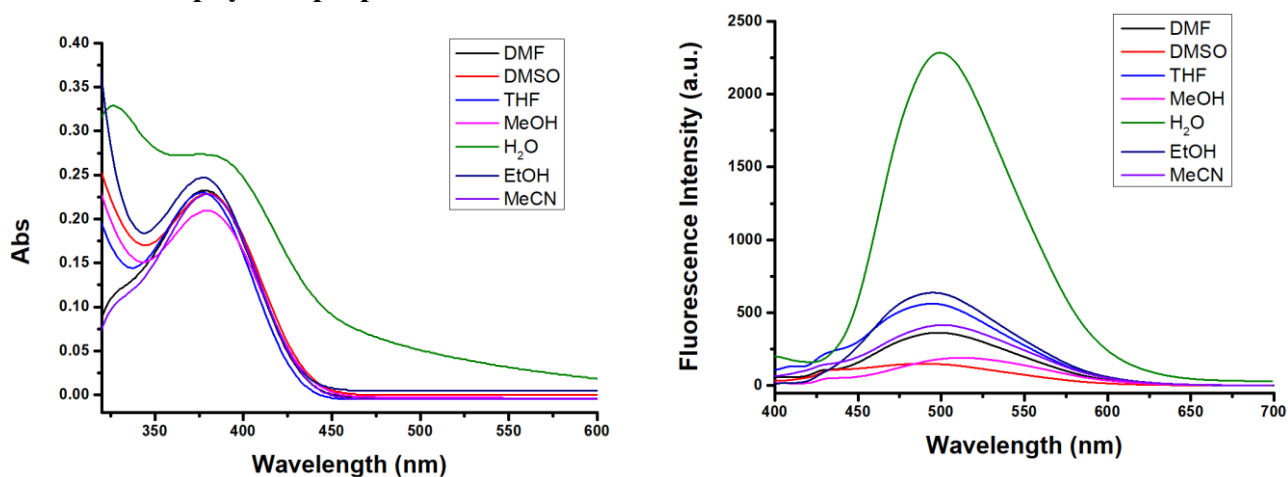

Figure 2. Absorption (left) and emission (right) spectra of **6a** in H<sub>2</sub>O ( $5 \times 10^{-5}$ M) and other organic solvents ( $1 \times 10^{-4}$ M)

Table 4. Photophysical properties of **6a** in H<sub>2</sub>O ( $5 \times 10^{-5}$ M) and other organic solvents ( $1 \times 10^{-4}$ M)

| Entry | Solvent          | $\lambda_{\text{abs}}^a$ / nm | $\lambda_{\text{em}}^b$ / nm | $\Delta S/\text{nm}$ ( $\text{cm}^{-1}$ ) | $\Phi_{\text{F}}^c$ / % |
|-------|------------------|-------------------------------|------------------------------|-------------------------------------------|-------------------------|
| 1     | DMSO             | 380                           | 422                          | 2676                                      | 1                       |
| 2     | THF              | 377                           | 465                          | 5020                                      | 1.9                     |
| 3     | MeOH             | 379                           | 512                          | 6854                                      | 0.7                     |
| 4     | EtOH             | 377                           | 511                          | 6956                                      | 1.3                     |
| 5     | H <sub>2</sub> O | 377                           | 497                          | 6404                                      | 2.0                     |
| 6     | MeCN             | 377                           | 498                          | 6445                                      | 1.7                     |
| 7     | DMF              | 377                           | 499                          | 6485                                      | 0.7                     |

<sup>a</sup> Absorption maxima. <sup>b</sup> Fluorescent emission maxima. <sup>c</sup> Relative quantum yields with quinine sulfate as standard ( $\Phi_{\text{F}} = 0.546$ ) (excited at 366 nm).

### 13. Copy of NMR spectra

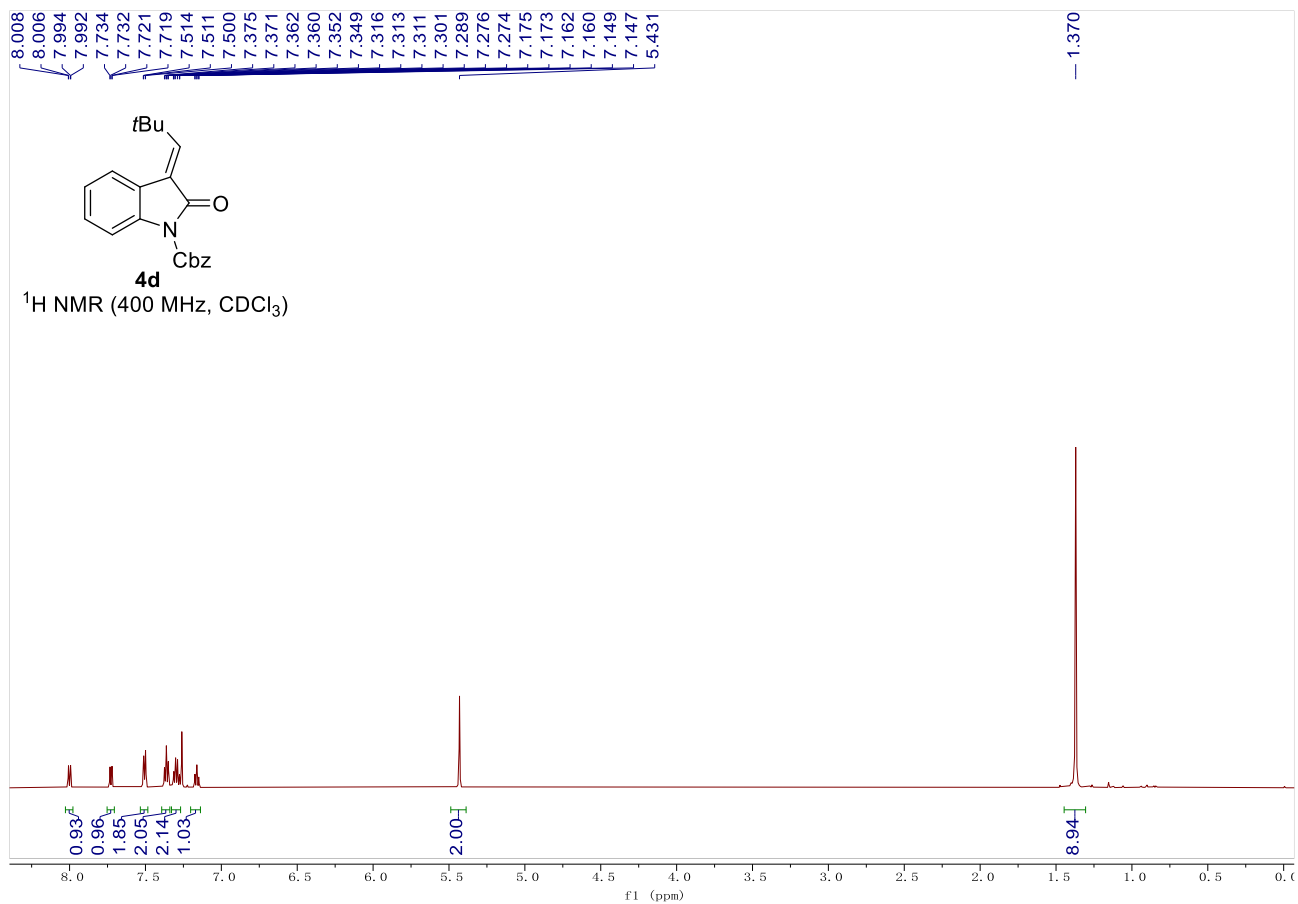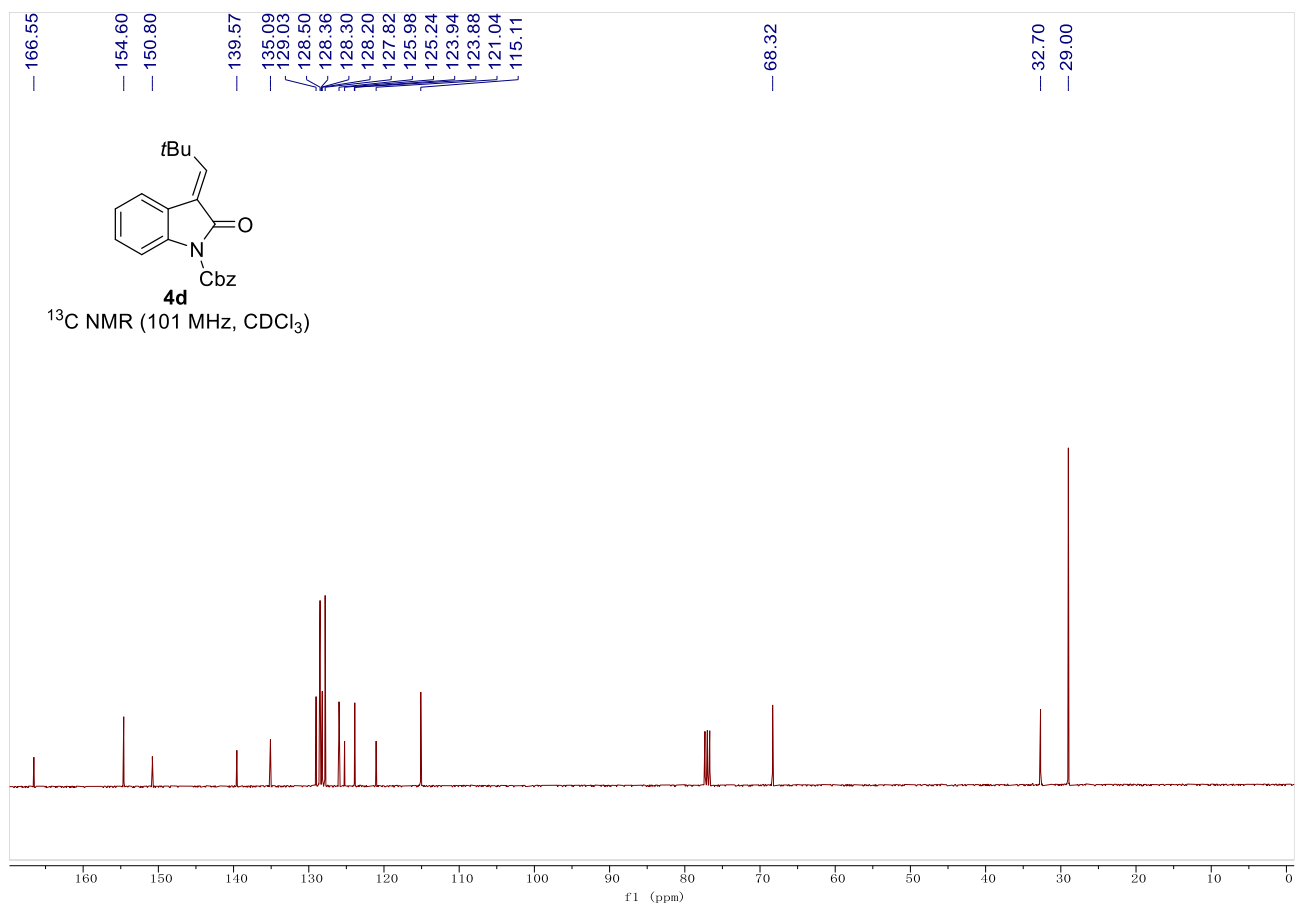

8.058  
8.037  
7.787  
7.768  
7.371  
7.352  
7.334  
7.331  
7.311  
7.246  
7.243  
7.227  
7.224  
7.208  
7.203

5.036  
5.031

1.394

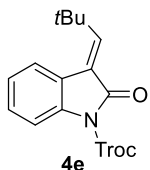

<sup>1</sup>H NMR (400 MHz, CDCl<sub>3</sub>)

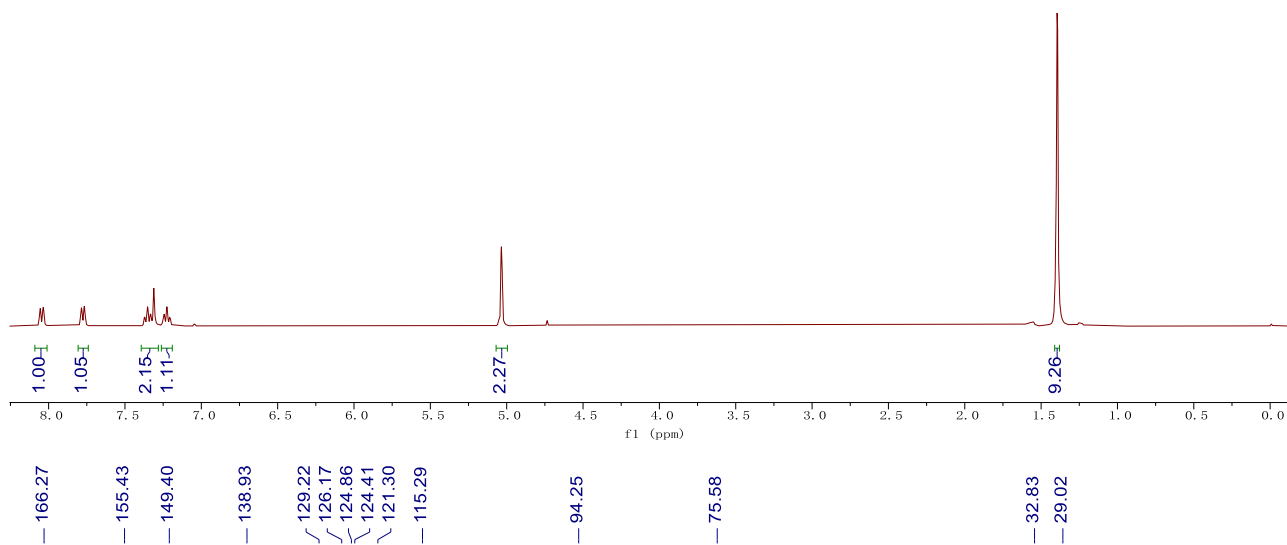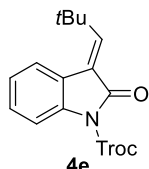

<sup>13</sup>C NMR (101 MHz, CDCl<sub>3</sub>)

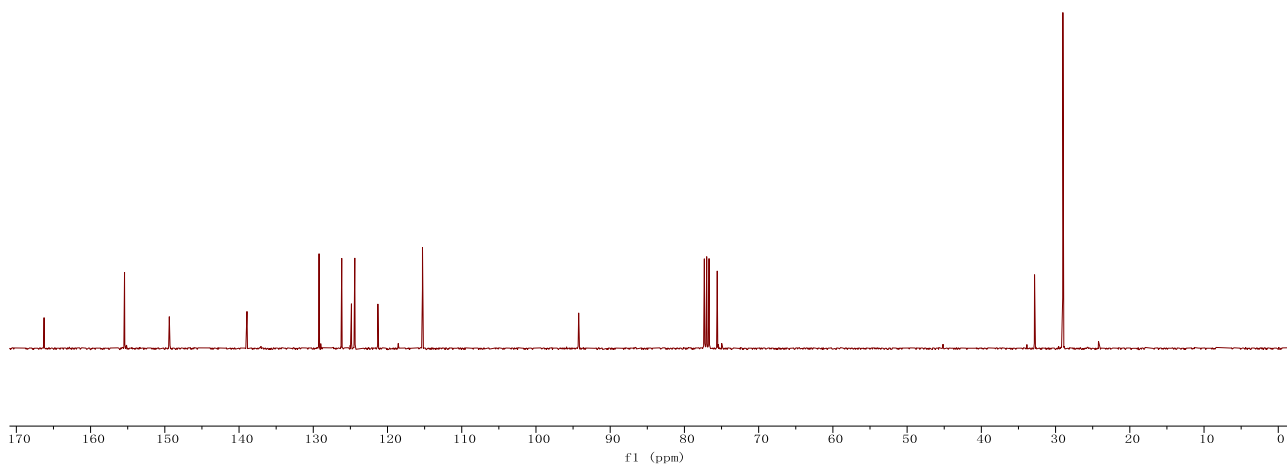

7.855  
7.850  
7.833  
7.828  
7.819  
7.814  
7.809  
7.432  
7.427  
7.422  
7.410  
7.405  
7.400  
7.272  
7.267

1.619  
1.368

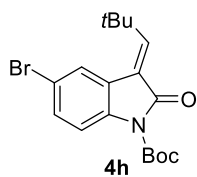

**4h**  
<sup>1</sup>H NMR (400 MHz, CDCl<sub>3</sub>)

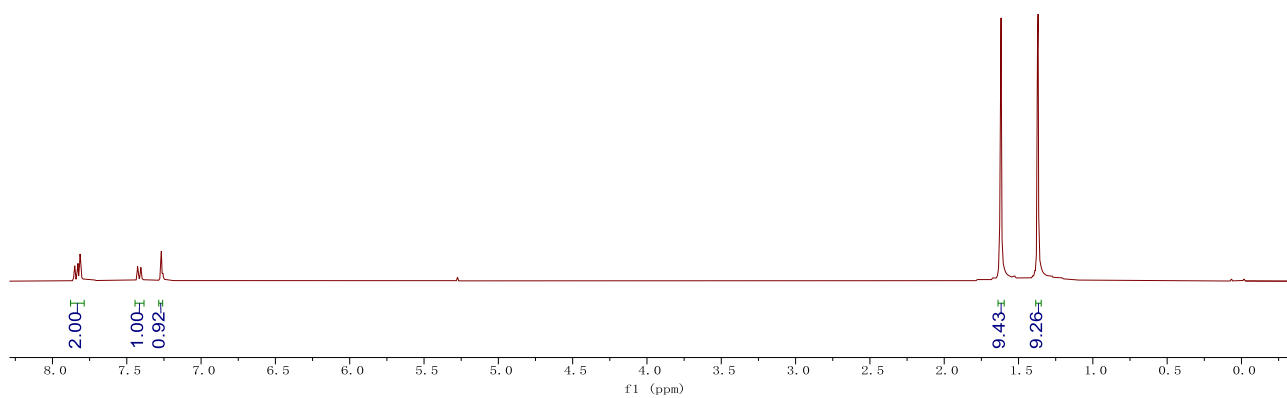

166.19  
156.09  
149.17  
139.01  
131.63  
128.73  
124.61  
122.87  
116.70  
116.55  
84.38  
32.95  
29.18  
28.08

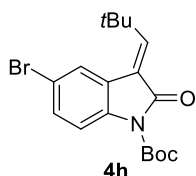

**4h**  
<sup>13</sup>C NMR (101 MHz, CDCl<sub>3</sub>)

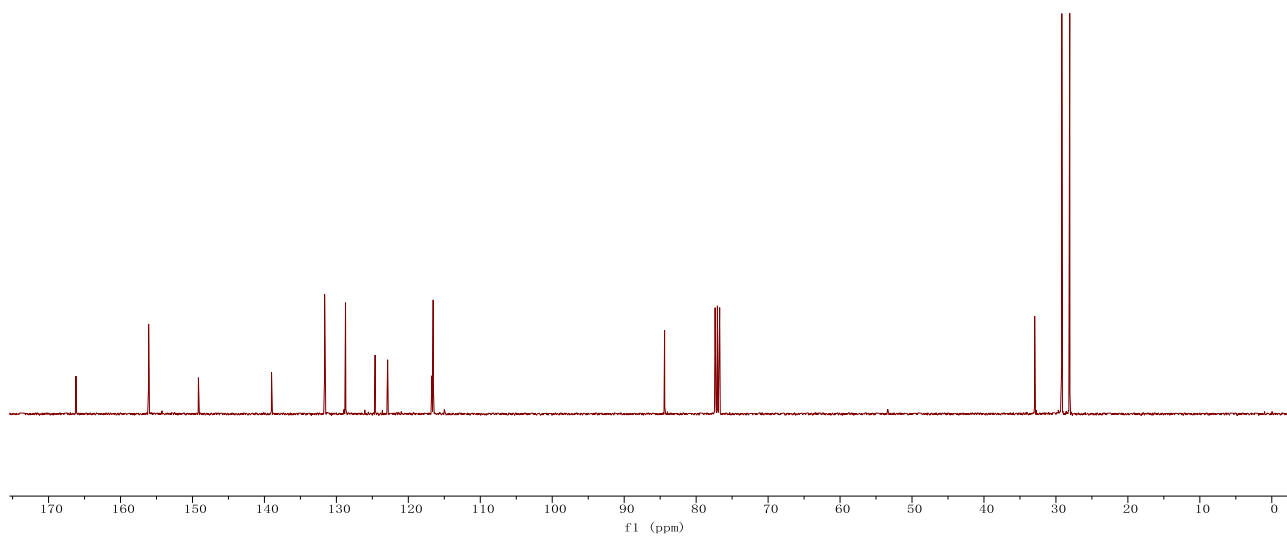



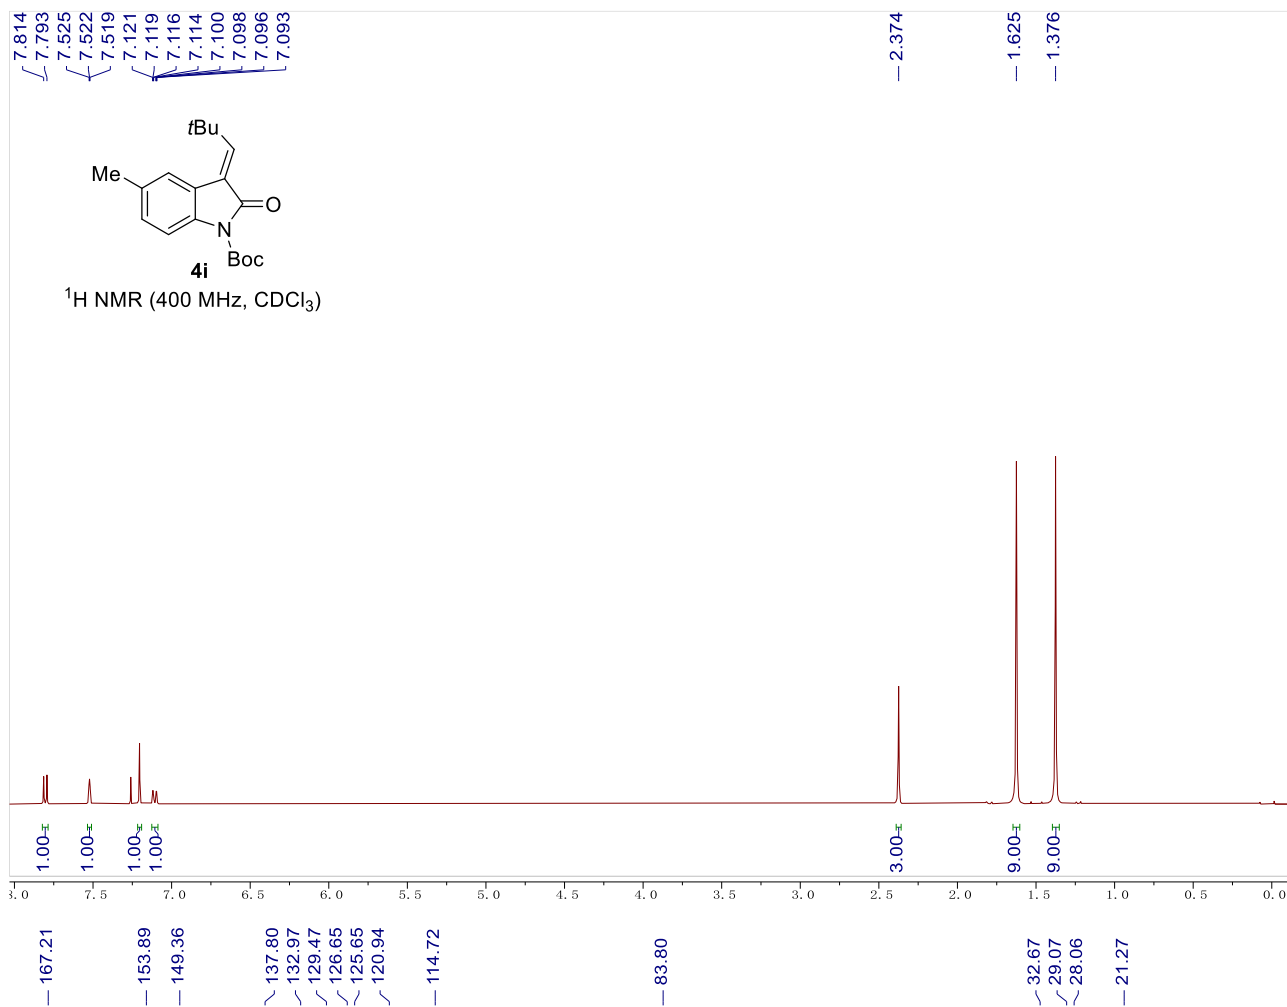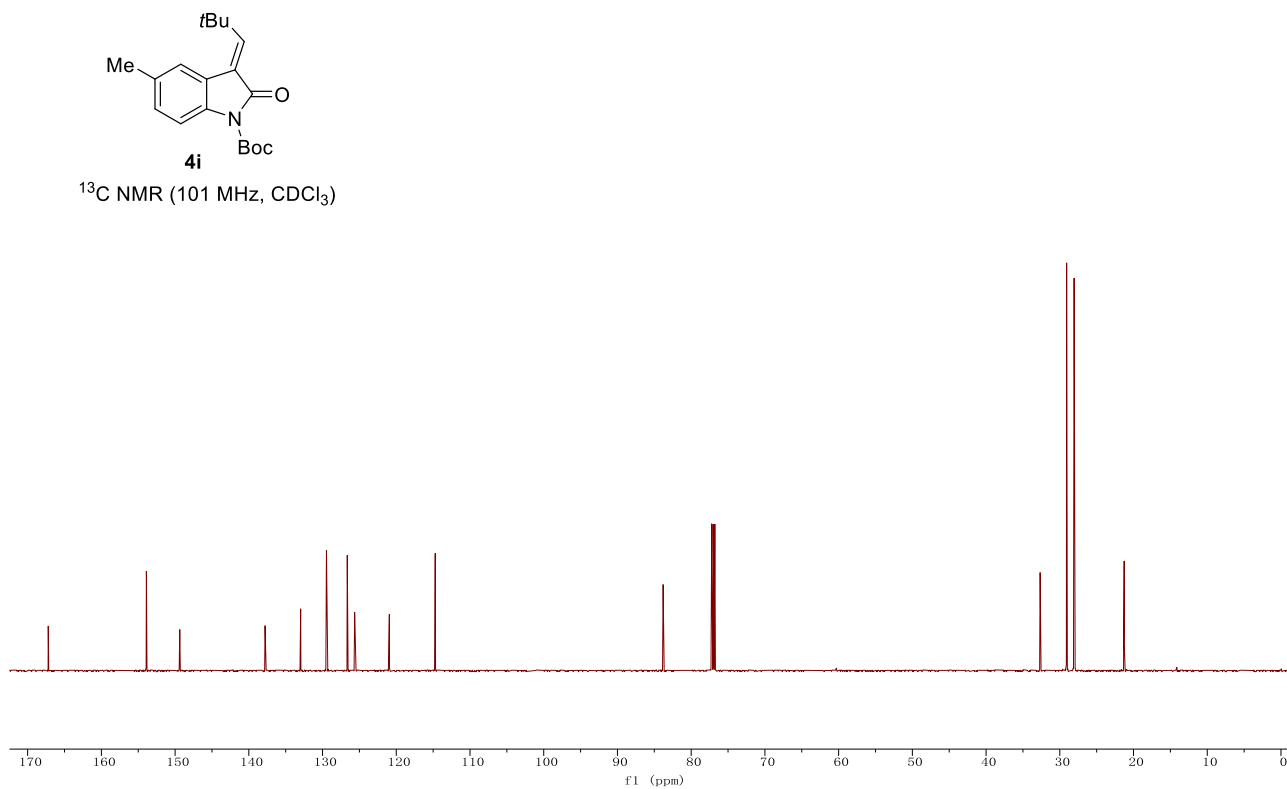

8.011  
8.006  
7.639  
7.634  
7.618  
7.613  
7.231  
7.149  
7.143  
7.138  
7.128  
7.123  
7.117

1.632  
1.361

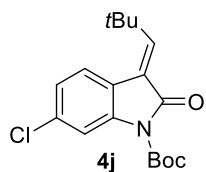

<sup>1</sup>H NMR (400 MHz, CDCl<sub>3</sub>)

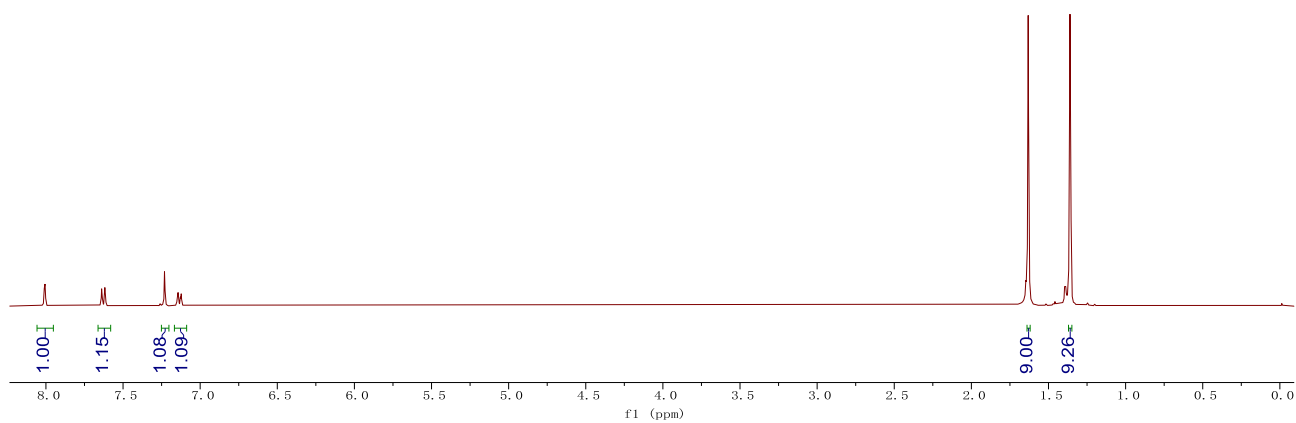

166.55  
154.77  
149.10  
140.89  
134.96  
126.62  
124.70  
123.68  
119.41  
115.67

84.47

32.78  
29.09  
28.03

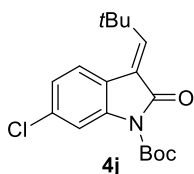

<sup>13</sup>C NMR (101 MHz, CDCl<sub>3</sub>)

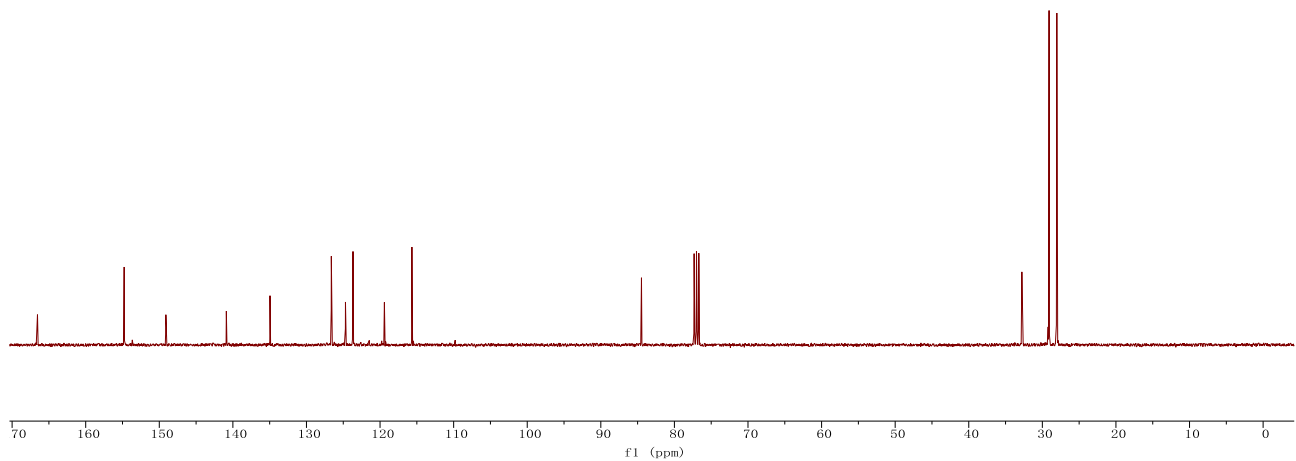

8.198  
8.194  
7.601  
7.580  
7.335  
7.330  
7.314  
7.309  
7.278

1.656  
1.385

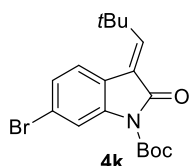

<sup>1</sup>H NMR (400 MHz, CDCl<sub>3</sub>)

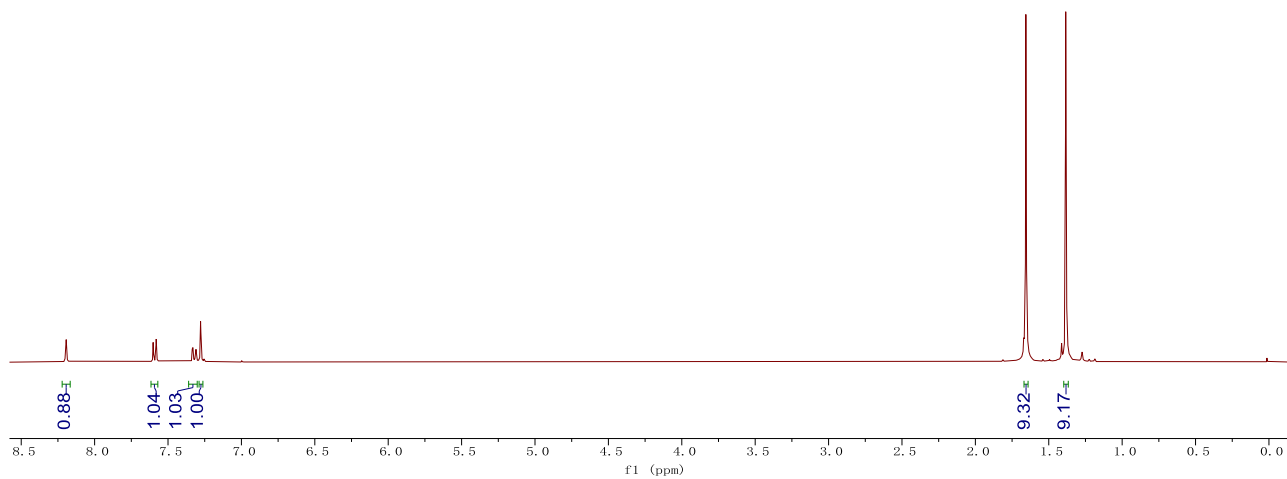

166.46  
155.08  
149.13  
140.97  
126.91  
126.66  
124.80  
123.08  
119.88  
118.50

84.53

32.87  
29.09  
28.07

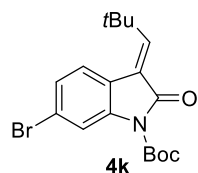

<sup>13</sup>C NMR (101 MHz, CDCl<sub>3</sub>)

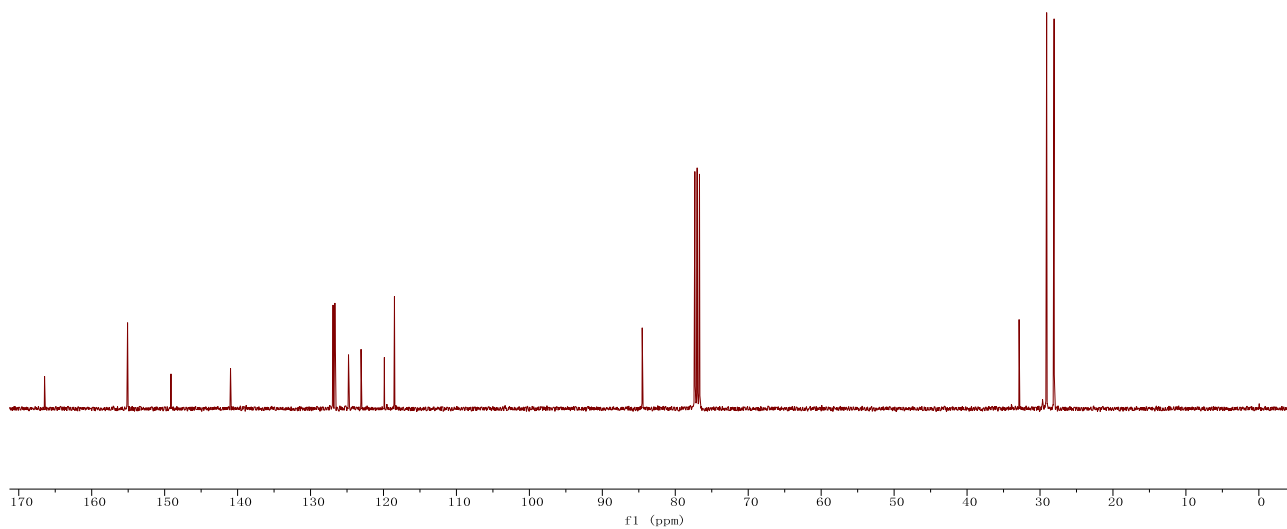

7.685  
7.665  
7.467  
7.446  
7.253  
7.038  
7.018  
6.998  
6.989

1.641  
1.372

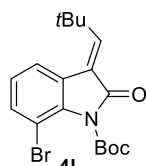

$^1\text{H NMR}$  (400 MHz,  $\text{CDCl}_3$ )

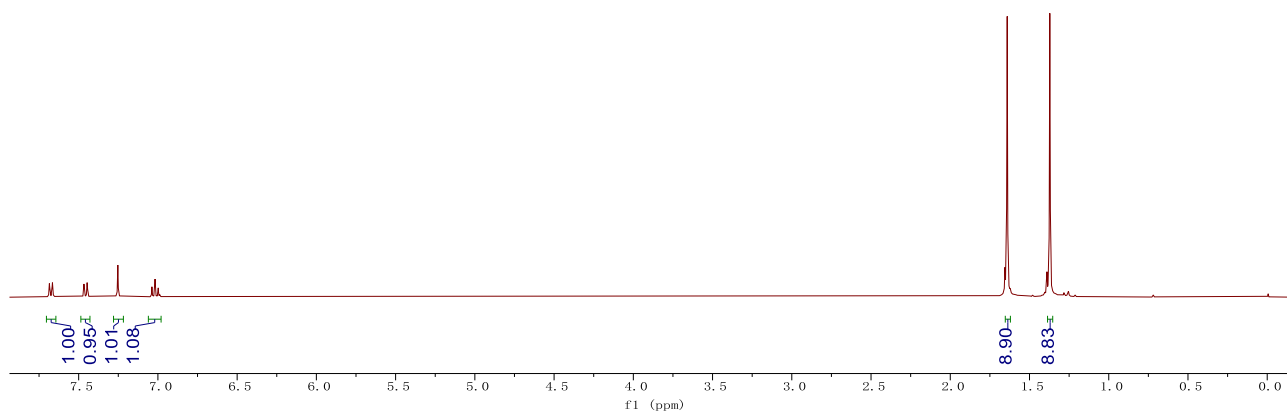

167.62  
156.02  
148.34  
139.15  
133.63  
125.43  
125.11  
124.46  
124.22  
106.95  
85.18  
32.94  
29.12  
27.74

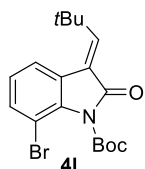

$^{13}\text{C NMR}$  (101 MHz,  $\text{CDCl}_3$ )

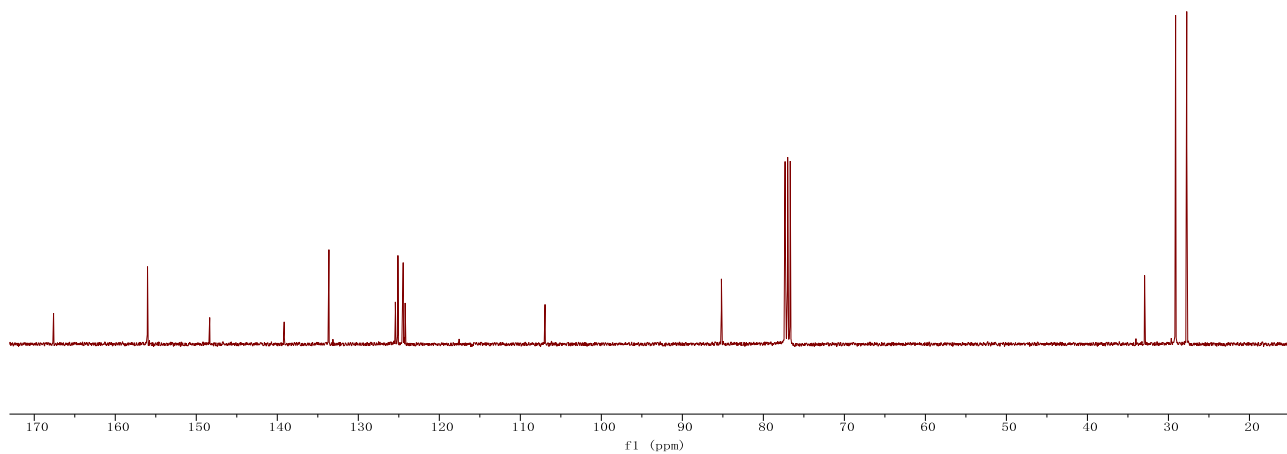

7.382  
7.379  
7.368  
7.352  
7.341  
7.337  
7.326  
7.322  
7.319  
7.315  
7.308  
7.304  
7.299  
7.297  
7.293  
7.285  
7.283  
7.278  
7.276  
7.273  
7.272  
7.238  
7.236  
7.233  
7.227  
7.224  
7.220  
7.215  
7.212  
7.208  
7.205  
7.200  
7.197  
7.195  
7.189  
7.185  
7.183  
4.887  
4.877  
4.799  
4.612  
4.601  
4.591  
3.698

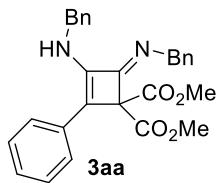

$^1\text{H NMR}$  (600 MHz,  $\text{CDCl}_3$ )

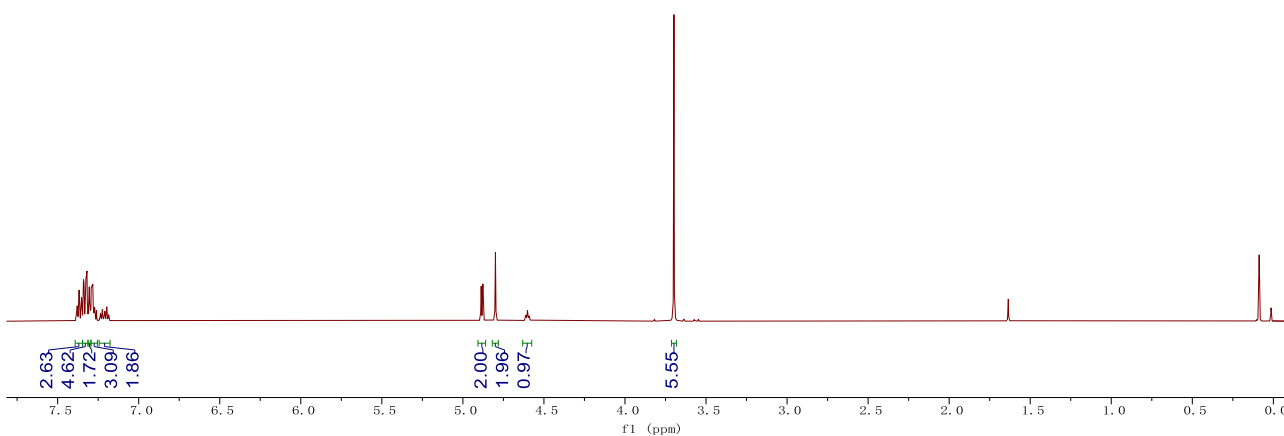

169.54  
150.82  
145.68  
139.69  
139.61  
132.52  
128.62  
128.61  
128.21  
127.61  
127.41  
127.40  
126.80  
126.54  
126.18  
118.79

68.74

55.67  
52.68  
48.81

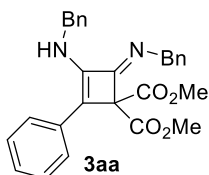

$^{13}\text{C NMR}$  (151 MHz,  $\text{CDCl}_3$ )

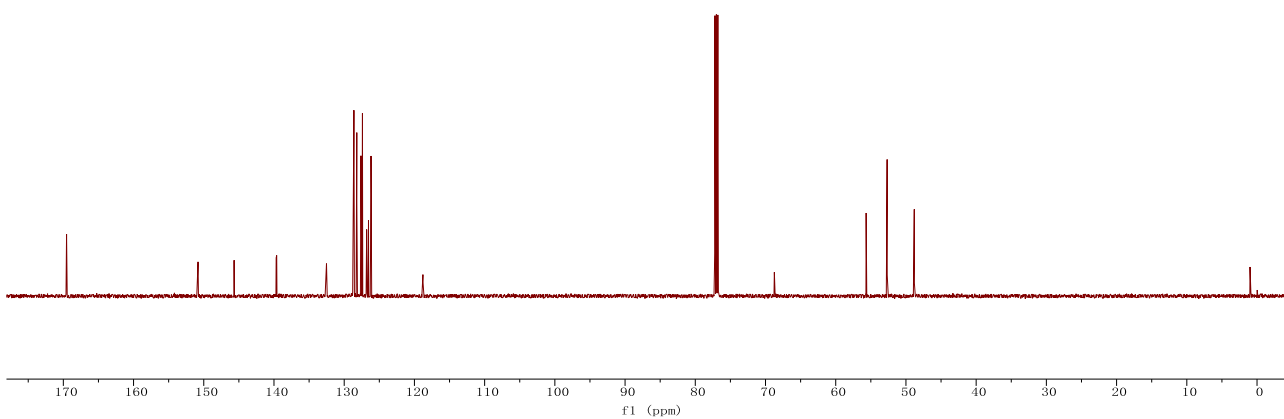

7.377  
7.374  
7.371  
7.363  
7.355  
7.352  
7.341  
7.338  
7.336  
7.330  
7.324  
7.317  
7.311  
7.306  
7.296  
7.293  
7.282  
7.273  
7.271  
7.266  
7.229  
7.225  
7.220  
7.218  
7.215  
7.209  
7.204  
7.201  
7.198  
7.195  
7.189  
7.186  
7.183  
7.178  
7.175  
7.172  
4.882  
4.871  
4.815  
4.608  
4.598  
4.587  
4.220  
4.208  
4.202  
4.196  
4.190  
4.184  
4.178  
4.172  
4.166  
4.160  
4.154  
4.143  
1.162  
1.150  
1.138

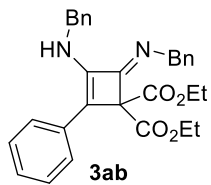

$^1\text{H NMR}$  (600 MHz,  $\text{CDCl}_3$ )

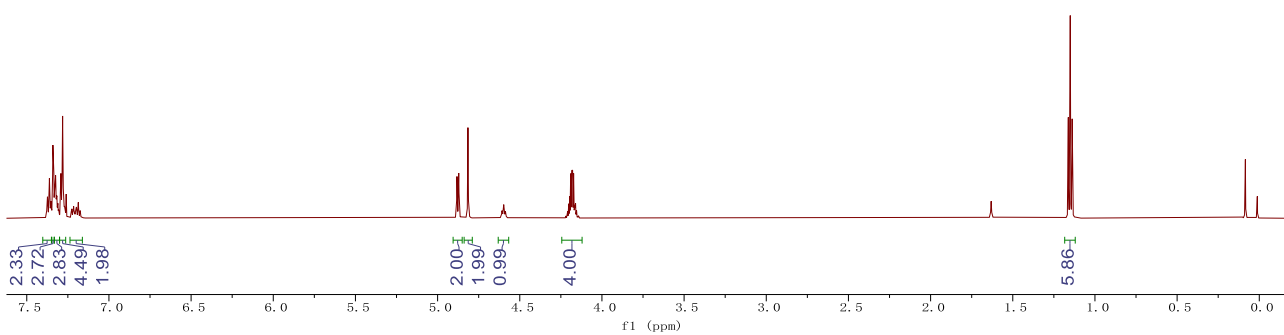

169.09  
151.12  
145.61  
139.83  
139.79  
132.64  
128.59  
128.45  
128.16  
127.56  
127.38  
127.35  
126.72  
126.48  
126.37  
119.14  
69.26  
61.68  
55.75  
48.75  
13.93

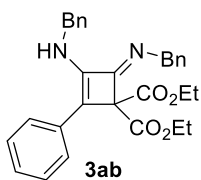

$^{13}\text{C NMR}$  (151 MHz,  $\text{CDCl}_3$ )

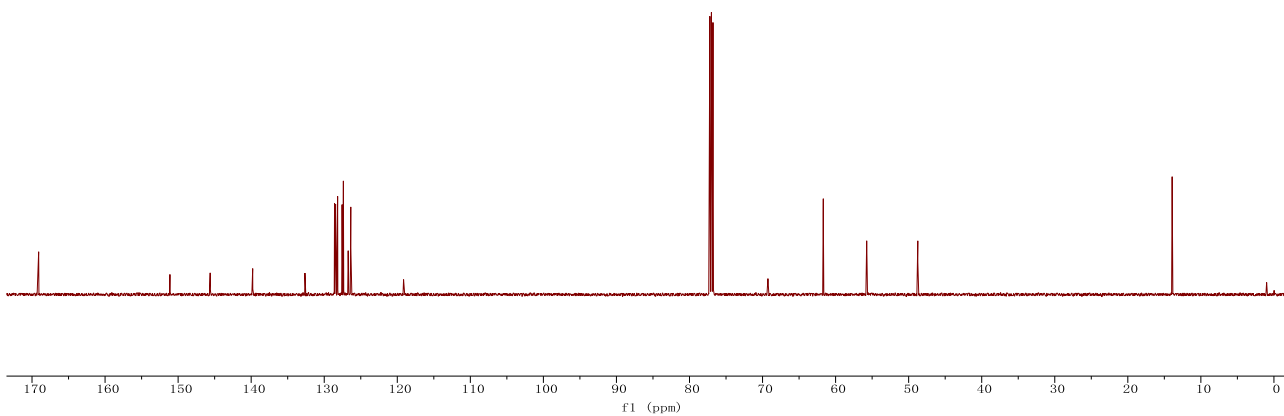

7.370  
7.365  
7.348  
7.344  
7.330  
7.323  
7.311  
7.289  
7.278  
7.268  
7.251  
7.237  
7.227  
7.216  
7.206  
7.192  
7.174  
7.160  
7.156  
7.152  
5.104  
5.088  
5.073  
5.057  
5.041  
5.026  
4.868  
4.852  
4.814  
4.602  
4.586  
4.570

1.154  
1.138

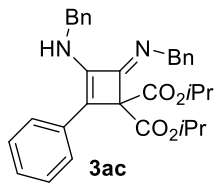

$^1\text{H NMR}$  (400 MHz,  $\text{CDCl}_3$ )

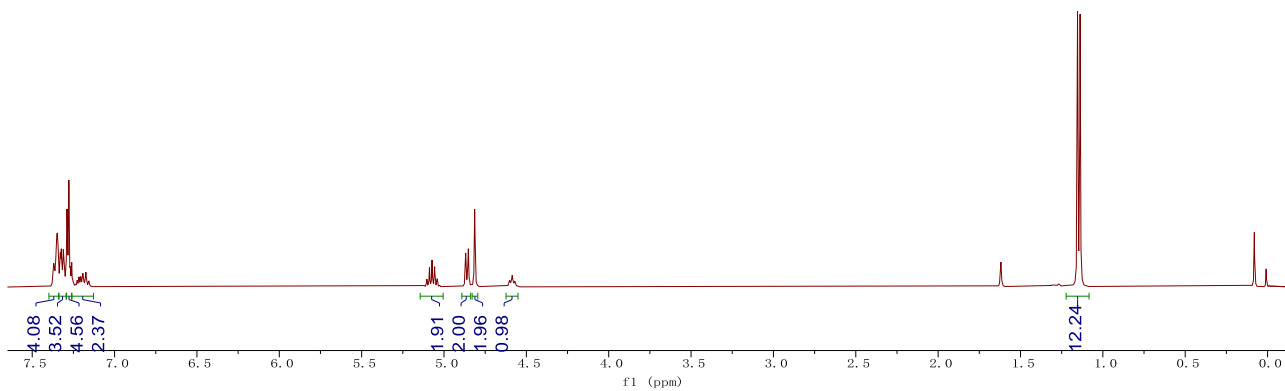

168.62  
151.30  
145.56  
139.97  
139.90  
132.72  
128.59  
128.29  
128.15  
127.53  
127.41  
127.31  
126.66  
126.56  
126.44  
119.39

69.82  
69.33

55.82

48.71

21.53  
21.44

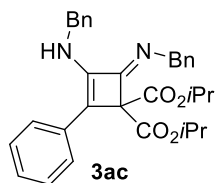

$^{13}\text{C NMR}$  (101 MHz,  $\text{CDCl}_3$ )

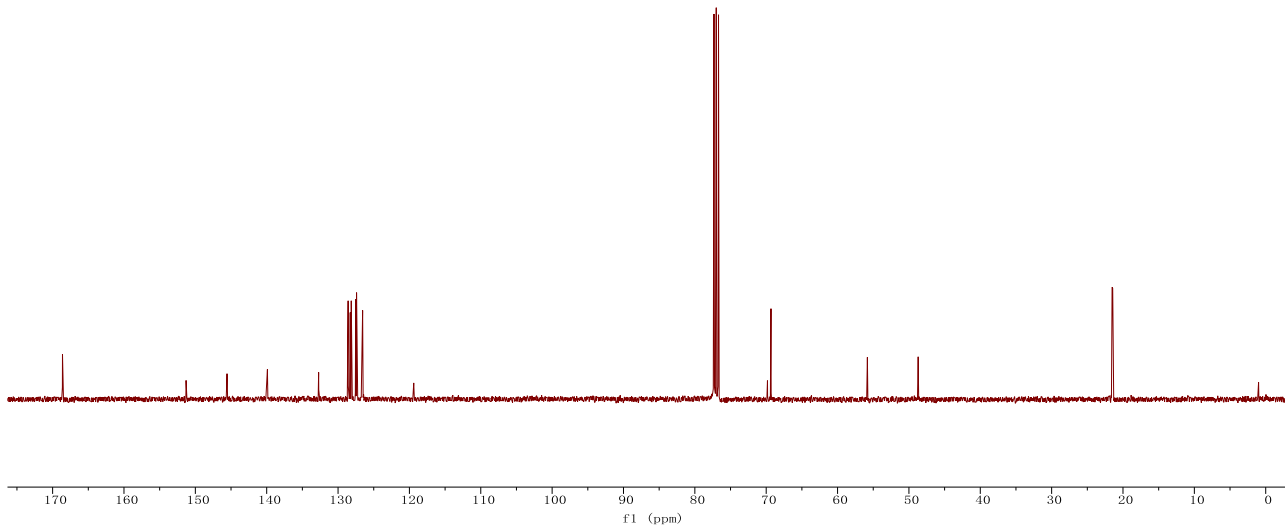

7.340  
7.332  
7.327  
7.319  
7.316  
7.294  
7.291  
7.280  
7.277  
7.273  
7.270  
7.260  
7.256  
7.251  
7.247  
7.242  
7.229  
7.220  
7.217  
7.215  
7.209  
7.207  
7.205  
7.195  
7.188  
7.185  
7.182  
7.177  
7.174  
7.165  
7.162  
7.159  
7.142  
7.130  
5.182  
5.174  
5.154  
5.132  
4.844  
4.834  
4.644  
4.606  
4.596  
4.585

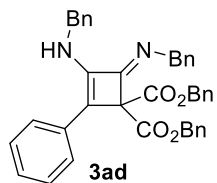

$^1\text{H NMR}$  (600 MHz,  $\text{CDCl}_3$ )

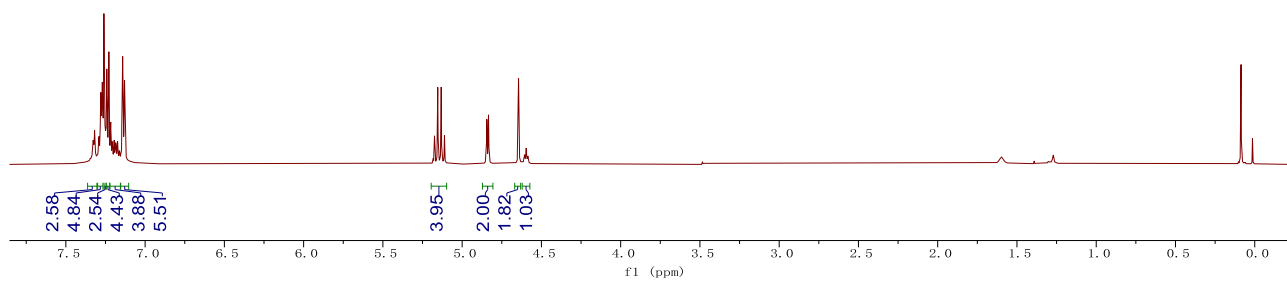

168.84  
150.51  
145.74  
139.69  
139.64  
135.23  
132.52  
128.60  
128.50  
128.40  
128.15  
128.13  
128.08  
127.53  
127.38  
127.35  
126.78  
126.44  
126.43  
118.74  
69.37  
67.36  
55.70  
48.74

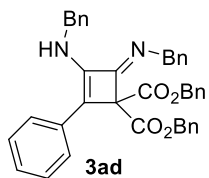

$^{13}\text{C NMR}$  (151 MHz,  $\text{CDCl}_3$ )

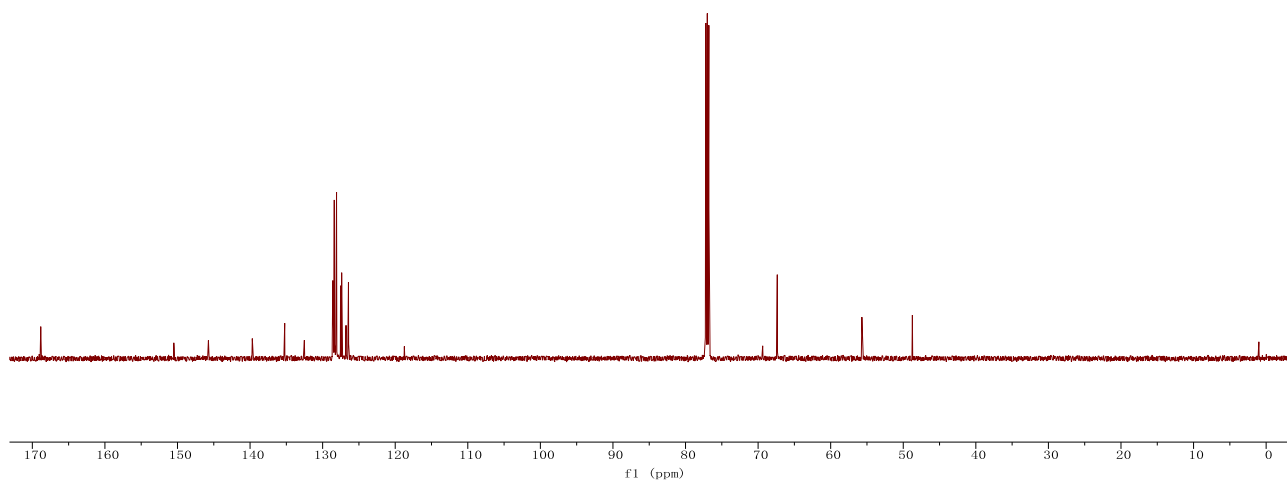



7.364  
7.351  
7.341  
7.329  
7.317  
7.305  
7.293  
7.280  
7.268  
7.249  
7.228  
7.216  
7.204  
7.171  
7.159  
7.147  
7.136  
7.101  
7.089  
7.076  
7.034  
7.020  
7.013  
7.000  
5.124  
5.113  
5.104  
5.095  
5.085  
4.943  
4.932  
4.793  
3.689

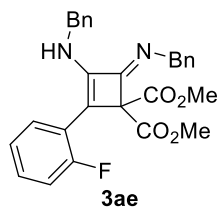

$^1\text{H NMR}$  (600 MHz,  $\text{CDCl}_3$ )

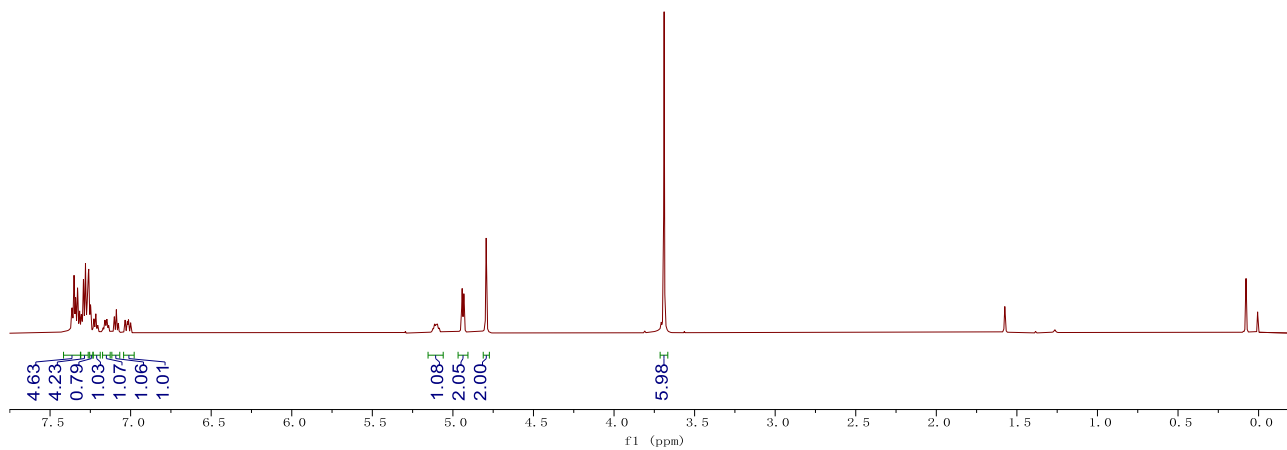

169.54  
159.76  
158.14  
150.76  
146.39  
139.92  
139.60  
128.55  
128.20  
128.15  
128.10  
127.80  
127.76  
127.41  
127.35  
127.21  
126.53  
124.50  
124.48  
120.49  
120.38  
115.55  
115.39  
111.72

68.17  
55.73  
52.71  
48.25

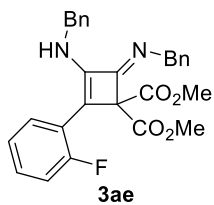

$^{13}\text{C NMR}$  (151 MHz,  $\text{CDCl}_3$ )

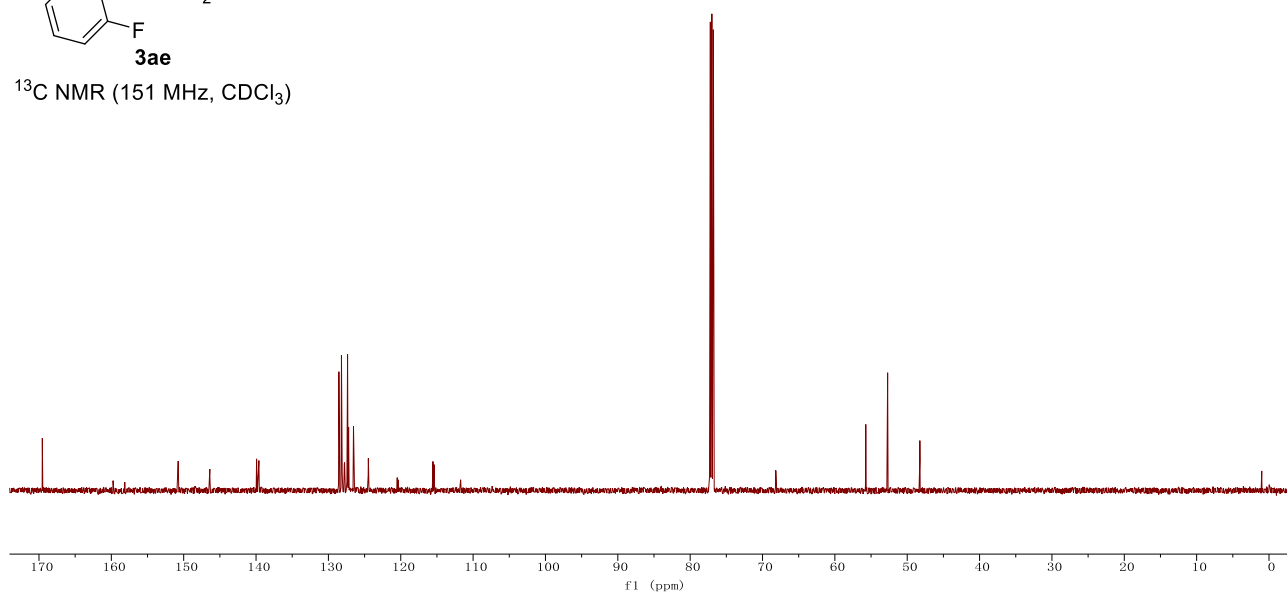

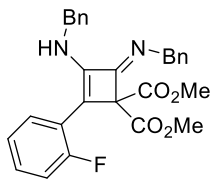

**3ae**

<sup>19</sup>F NMR (376 MHz, CDCl<sub>3</sub>)

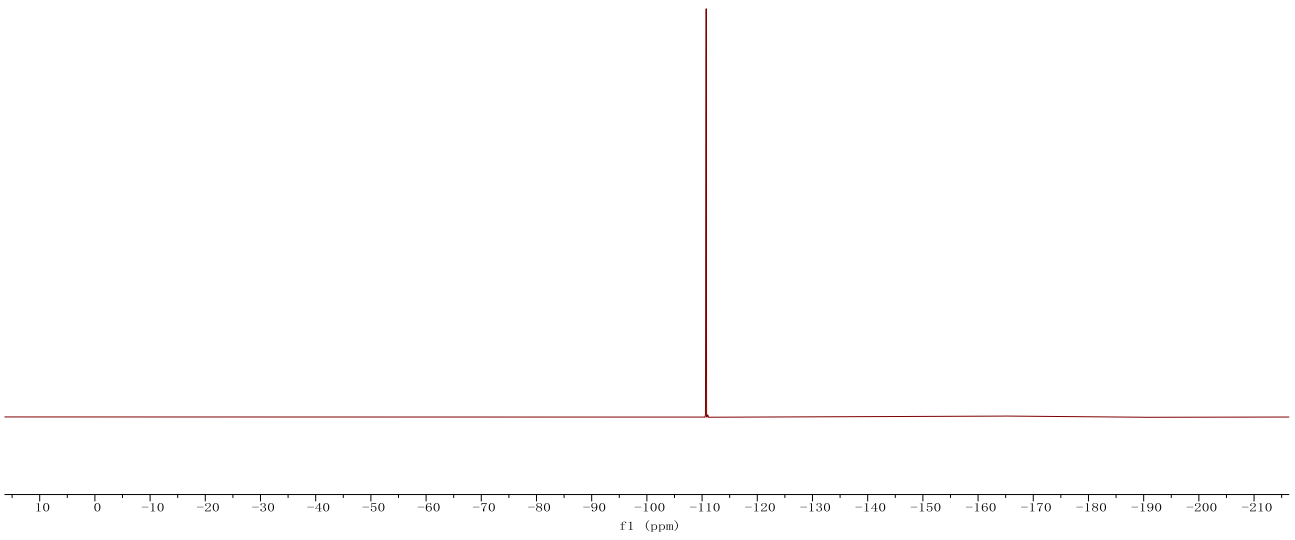

7.378  
7.372  
7.366  
7.362  
7.357  
7.350  
7.333  
7.327  
7.320  
7.311  
7.308  
7.303  
7.294  
7.291  
7.281  
7.269  
7.248  
7.245  
7.239  
7.235  
7.231  
7.224  
7.207  
7.201  
7.195  
7.191  
7.185  
7.179  
4.788  
4.751  
4.740  
4.730  
4.534  
4.523  
3.703

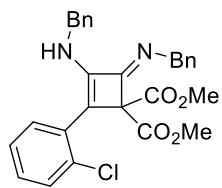

**3af**

$^1\text{H NMR}$  (400 MHz,  $\text{CDCl}_3$ )

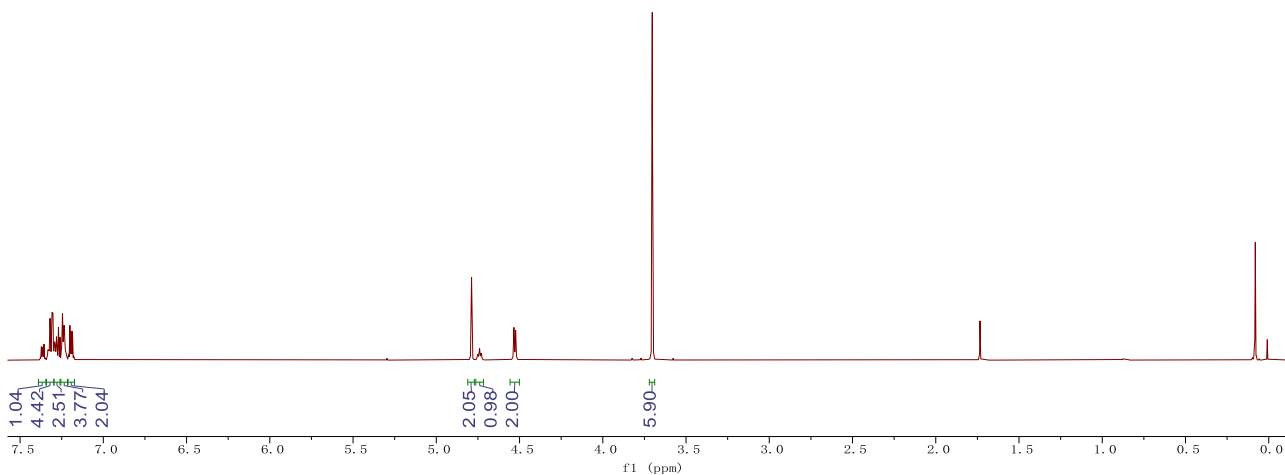

169.46  
150.77  
147.29  
139.45  
138.96  
132.94  
131.91  
129.96  
129.68  
128.81  
128.47  
128.30  
127.59  
127.49  
127.30  
126.68  
126.49  
114.70  
70.32  
55.73  
52.68  
47.93

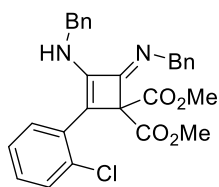

**3af**

$^{13}\text{C NMR}$  (101 MHz,  $\text{CDCl}_3$ )

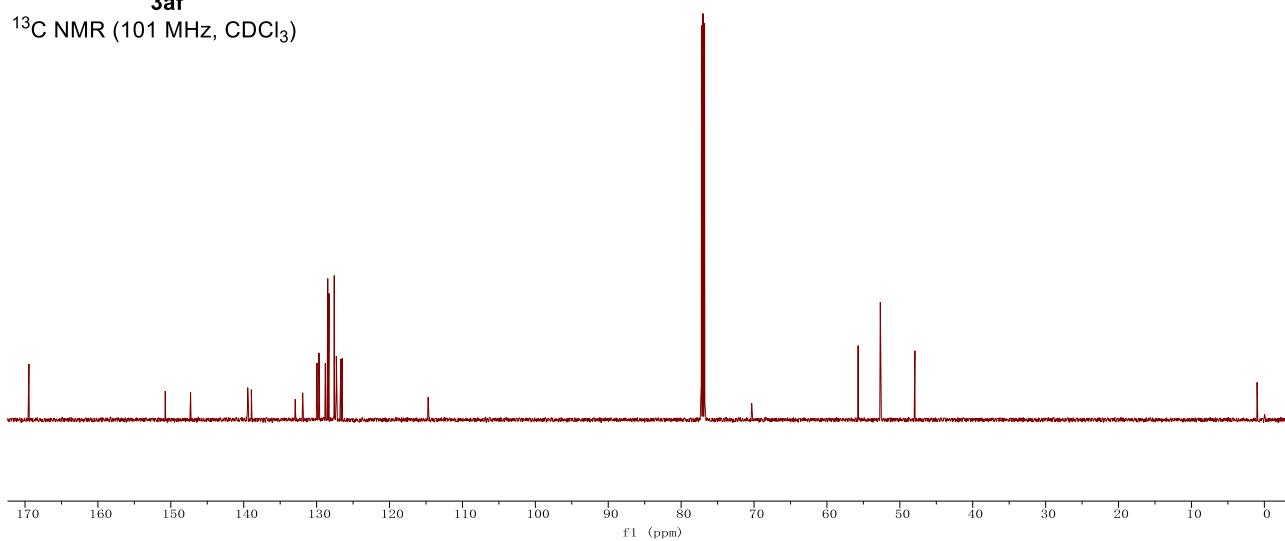

7.391  
7.379  
7.352  
7.348  
7.339  
7.337  
7.329  
7.326  
7.304  
7.301  
7.291  
7.284  
7.279  
7.271  
7.260  
7.225  
7.222  
7.218  
7.215  
7.211  
7.205  
7.202  
7.182  
7.179  
7.168  
7.156  
7.153  
6.943  
6.931  
6.918  
6.855  
6.841  
5.449  
5.439  
5.428  
4.934  
4.923  
4.780  
3.755  
3.674

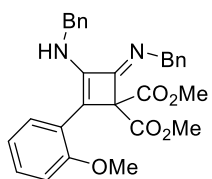

**3ag**

$^1\text{H NMR}$  (600 MHz,  $\text{CDCl}_3$ )

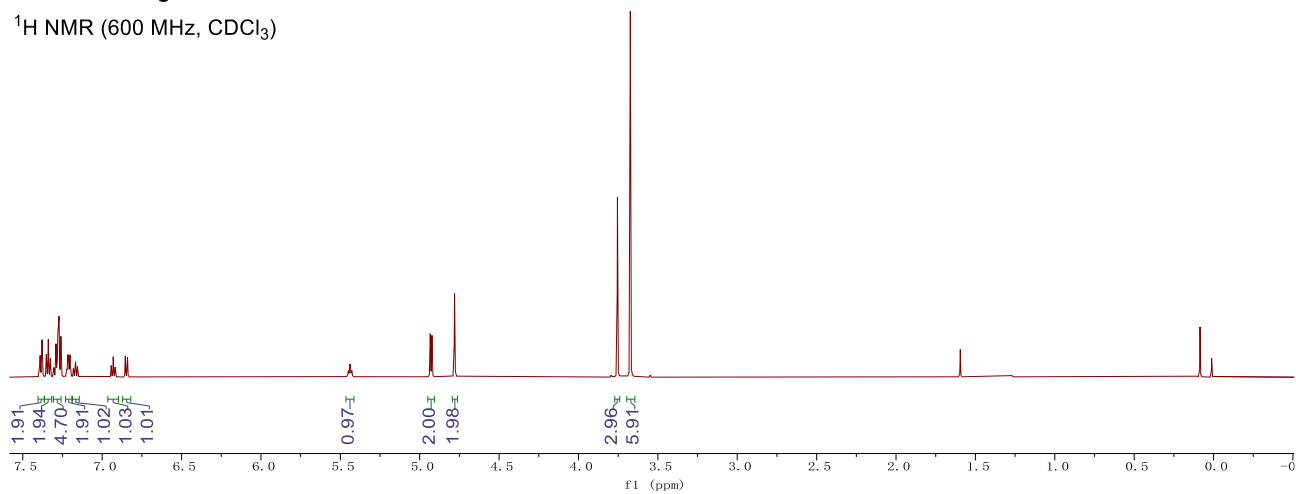

169.88  
155.57  
151.22  
146.04  
140.58  
139.88  
128.52  
128.13  
128.07  
127.77  
127.34  
127.05  
126.41  
122.26  
121.30  
115.25  
111.32  
68.22  
55.62  
55.60  
52.55  
48.32

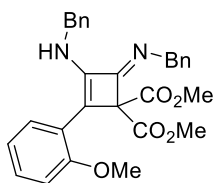

**3ag**

$^{13}\text{C NMR}$  (151 MHz,  $\text{CDCl}_3$ )

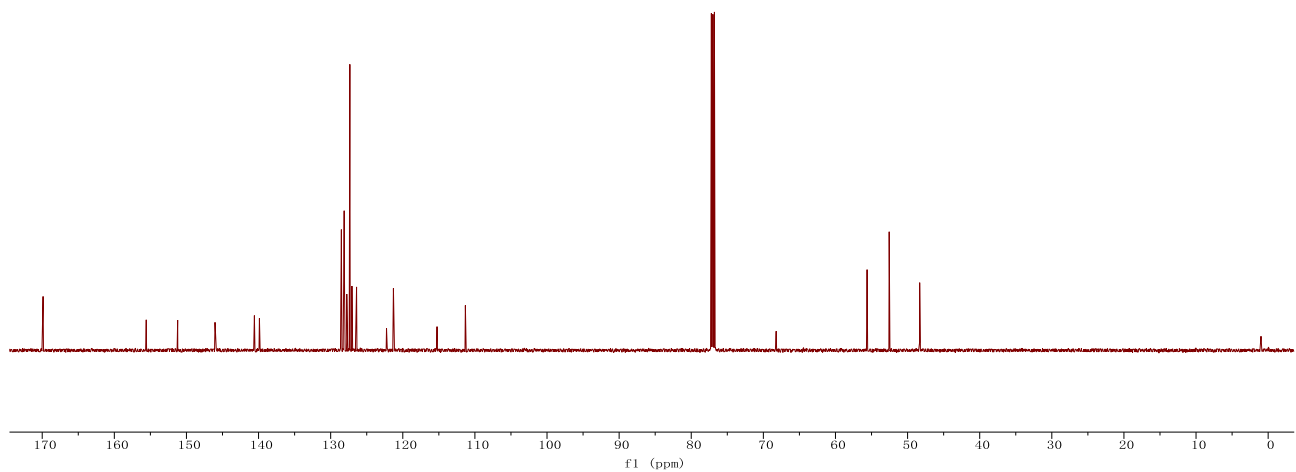

7.377  
7.362  
7.356  
7.347  
7.333  
7.328  
7.326  
7.316  
7.299  
7.294  
7.288  
7.279  
7.274  
7.251  
7.234  
7.217  
7.092  
7.073  
7.041  
7.037  
7.035  
7.015  
7.012  
7.009  
6.911  
6.905  
6.890  
6.884  
6.869  
6.863  
4.891  
4.875  
4.815  
4.694  
4.678  
4.663  
3.715

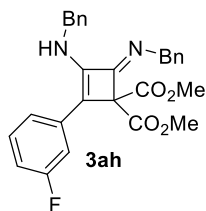

$^1\text{H NMR}$  (400 MHz,  $\text{CDCl}_3$ )

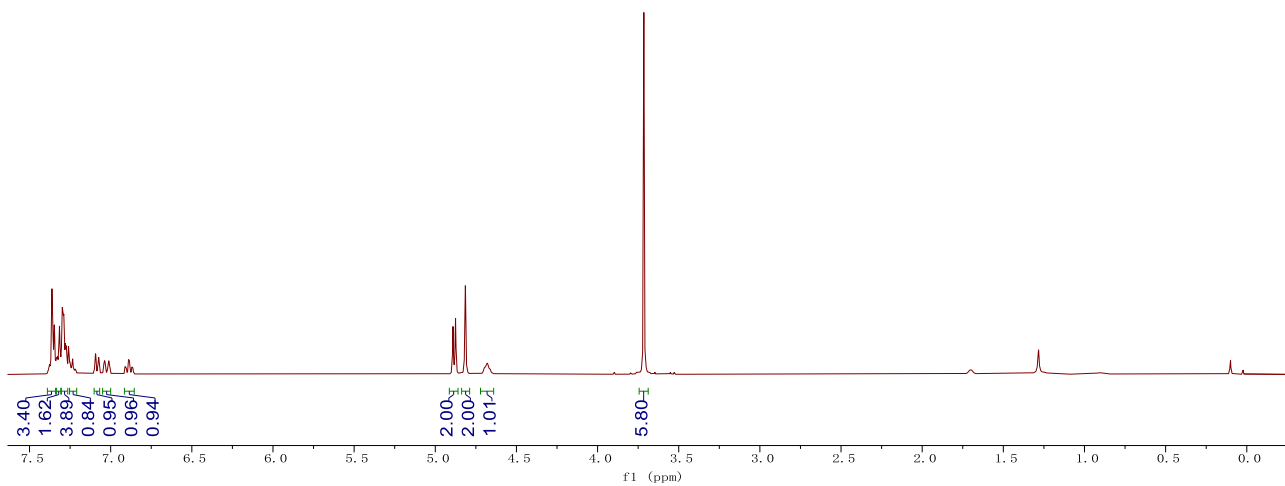

169.28  
164.05  
161.61  
150.56  
146.32  
139.51  
139.32  
134.64  
134.56  
130.10  
130.01  
128.65  
128.23  
127.59  
127.49  
127.39  
126.59  
121.88  
121.85  
117.12  
117.09  
113.67  
113.46  
112.83  
112.60  
68.89  
55.73  
52.74  
48.78

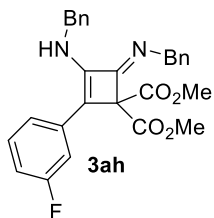

$^{13}\text{C NMR}$  (101 MHz,  $\text{CDCl}_3$ )

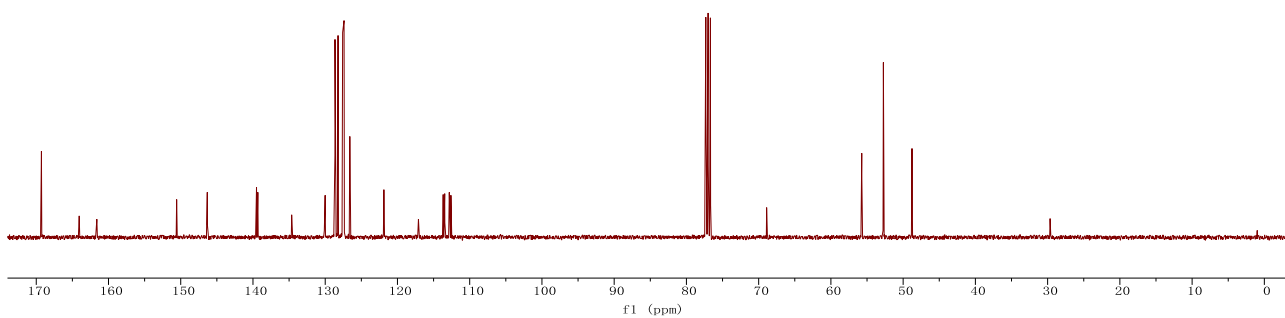

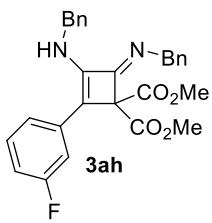

$^{19}\text{F}$  NMR (376 MHz,  $\text{CDCl}_3$ )

-112.38

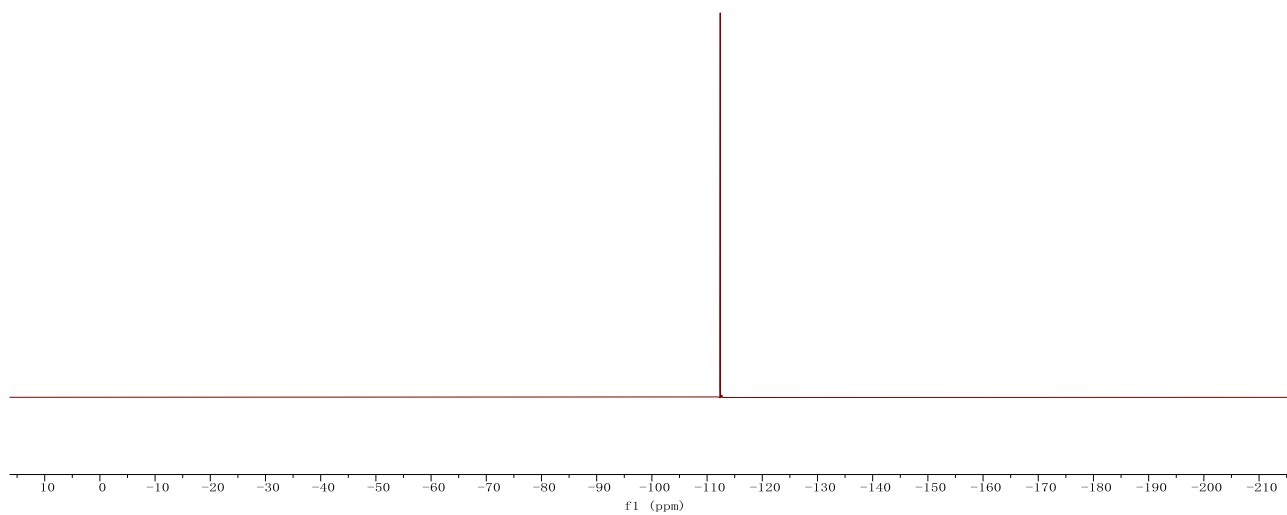

7.429  
7.425  
7.420  
7.358  
7.351  
7.345  
7.343  
7.328  
7.324  
7.312  
7.306  
7.294  
7.289  
7.287  
7.277  
7.273  
7.260  
7.246  
7.242  
7.238  
7.235  
7.231  
7.225  
7.218  
7.215  
7.211  
7.200  
7.181  
4.881  
4.865  
4.800  
4.673  
4.657  
4.641  
3.710

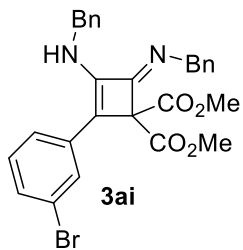

$^1\text{H NMR}$  (400 MHz,  $\text{CDCl}_3$ )

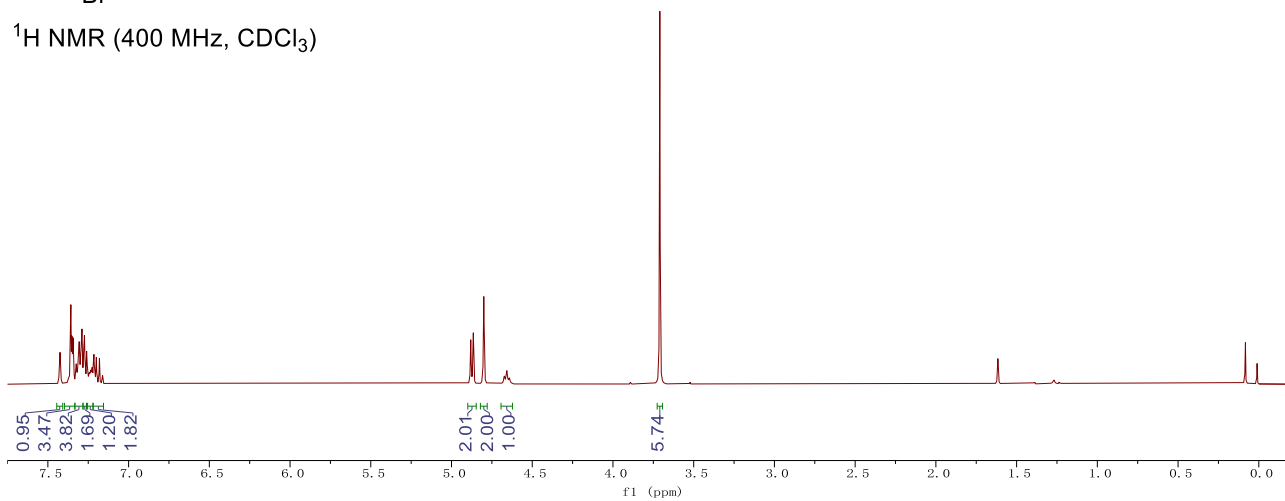

169.25  
150.50  
146.42  
139.50  
139.28  
134.64  
130.06  
129.54  
128.76  
128.68  
128.25  
127.59  
127.52  
127.41  
126.62  
124.67  
122.73  
116.65  
68.92  
55.73  
52.78  
48.77

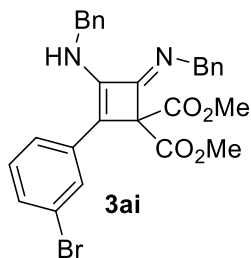

$^{13}\text{C NMR}$  (101 MHz,  $\text{CDCl}_3$ )

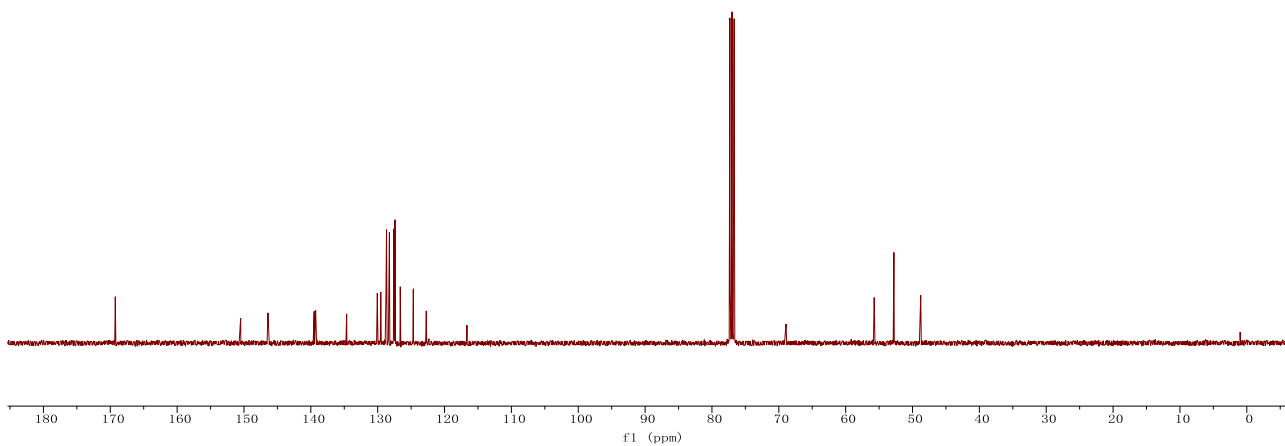

7.354  
7.347  
7.340  
7.323  
7.309  
7.303  
7.287  
7.278  
7.273  
7.246  
7.224  
7.206

4.864  
4.849  
4.792  
4.587  
4.571  
4.556

3.697

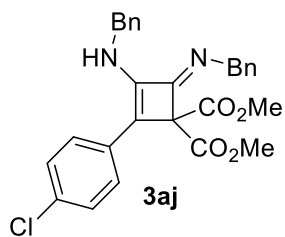

<sup>1</sup>H NMR (400 MHz, CDCl<sub>3</sub>)

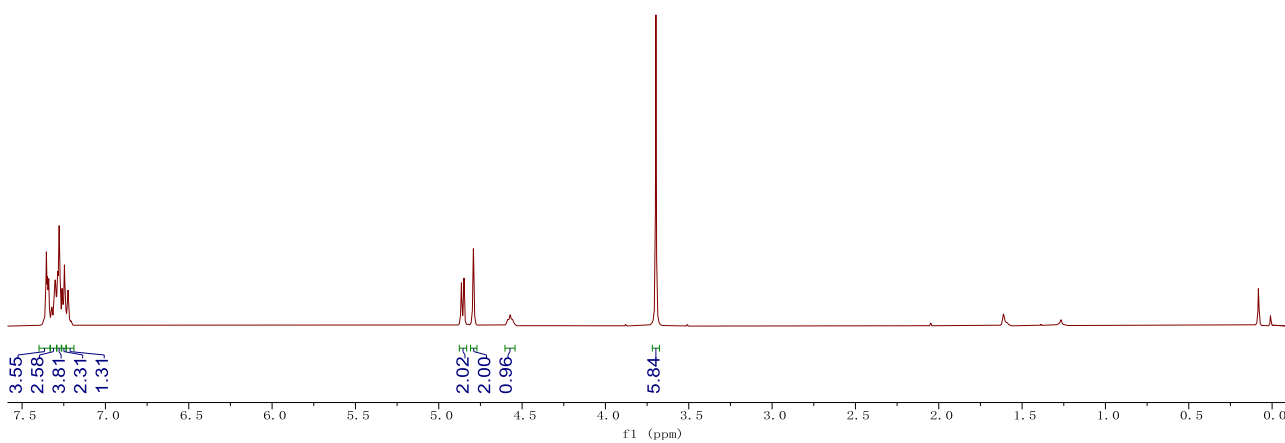

169.35

150.54

145.88

139.57

139.36

132.35

131.03

128.82

128.68

128.24

127.62

127.53

127.40

127.39

126.61

117.47

68.87

55.73

52.74

48.83

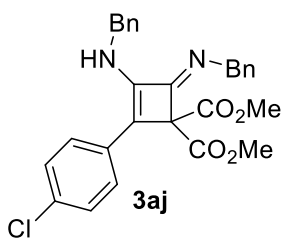

<sup>13</sup>C NMR (101 MHz, CDCl<sub>3</sub>)

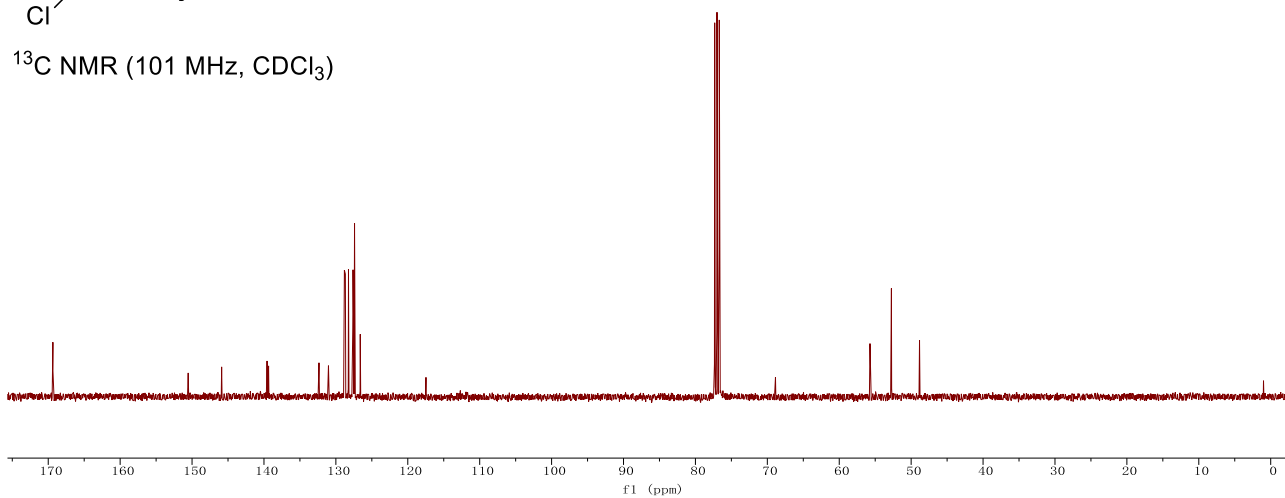



7.455  
7.449  
7.444  
7.432  
7.427  
7.421  
7.367  
7.353  
7.346  
7.339  
7.325  
7.322  
7.319  
7.309  
7.304  
7.293  
7.287  
7.278  
7.273  
7.256  
7.244  
7.239  
7.235  
7.228  
7.223  
7.215  
7.210  
7.205  
7.181  
7.176  
7.164  
7.160  
4.864  
4.849  
4.789  
4.591  
4.575  
4.559  
3.696

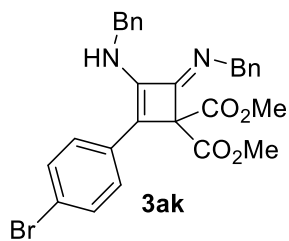

$^1\text{H NMR}$  (400 MHz,  $\text{CDCl}_3$ )

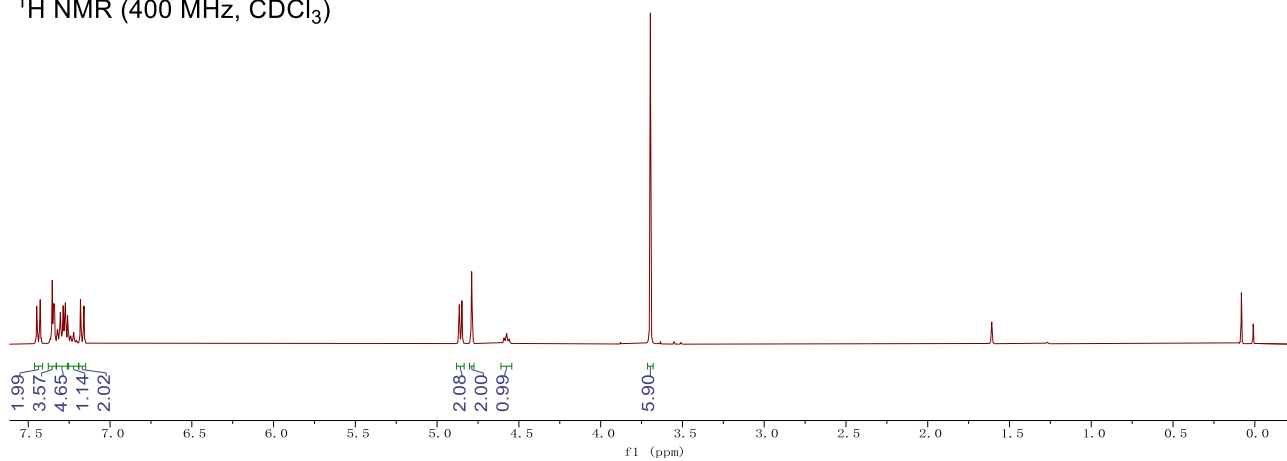

169.34  
150.54  
146.00  
139.54  
139.32  
131.74  
131.45  
128.68  
128.25  
127.62  
127.53  
127.40  
126.61  
120.45  
117.42  
68.82  
55.74  
52.76  
48.84

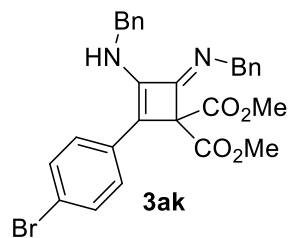

$^{13}\text{C NMR}$  (101 MHz,  $\text{CDCl}_3$ )

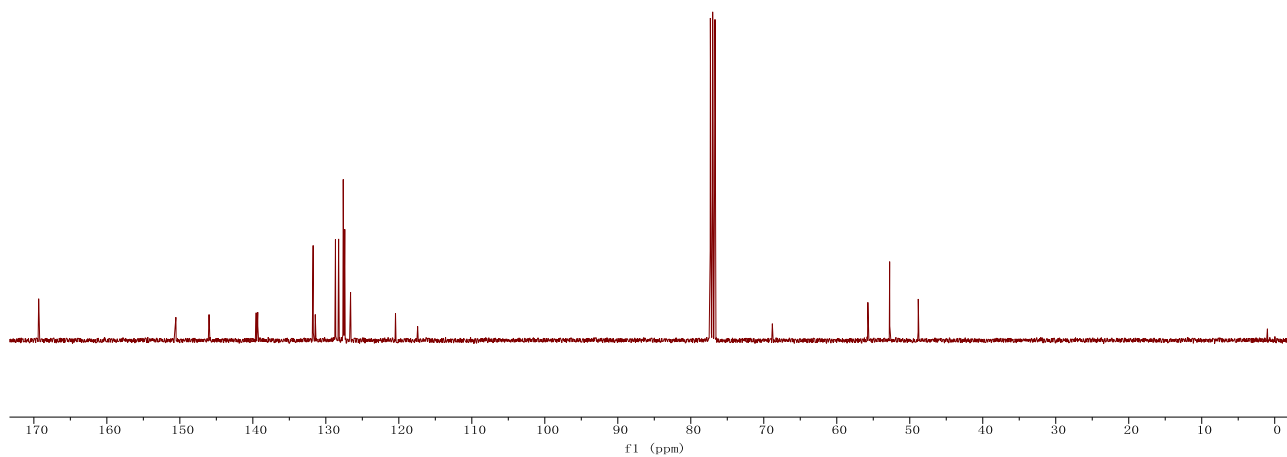

7.383  
7.378  
7.372  
7.361  
7.357  
7.352  
7.349  
7.344  
7.332  
7.327  
7.317  
7.313  
7.309  
7.299  
7.295  
7.292  
7.284  
7.278  
7.276  
7.271  
7.260  
7.255  
7.232  
7.226  
7.221  
7.217  
7.210  
7.205  
7.194  
7.150  
7.130  
4.869  
4.854  
4.779  
4.527  
4.511  
4.495  
3.686  
2.331

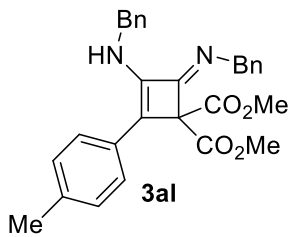

$^1\text{H NMR}$  (400 MHz,  $\text{CDCl}_3$ )

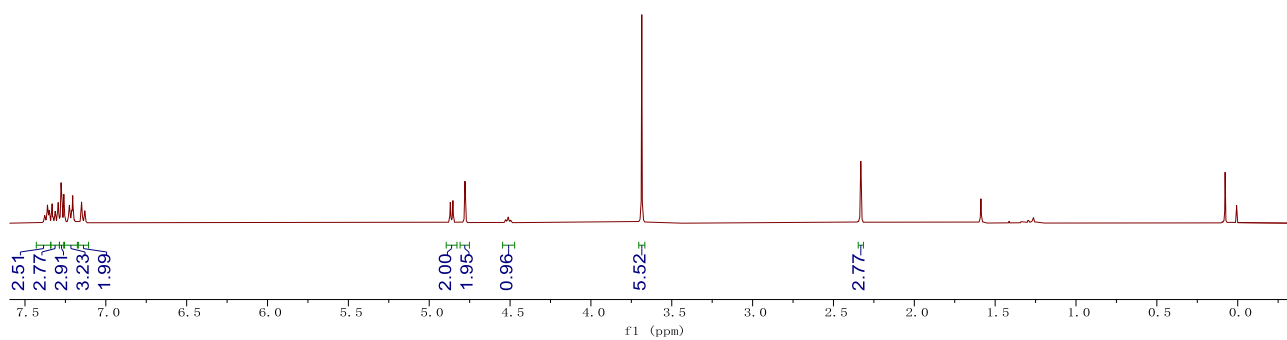

169.60  
150.86  
145.11  
139.81  
139.76  
136.94  
129.69  
129.35  
128.61  
128.20  
127.62  
127.42  
127.38  
126.51  
126.21  
119.33  
68.73  
55.63  
52.64  
48.83  
21.32

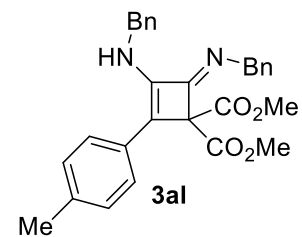

$^{13}\text{C NMR}$  (101 MHz,  $\text{CDCl}_3$ )

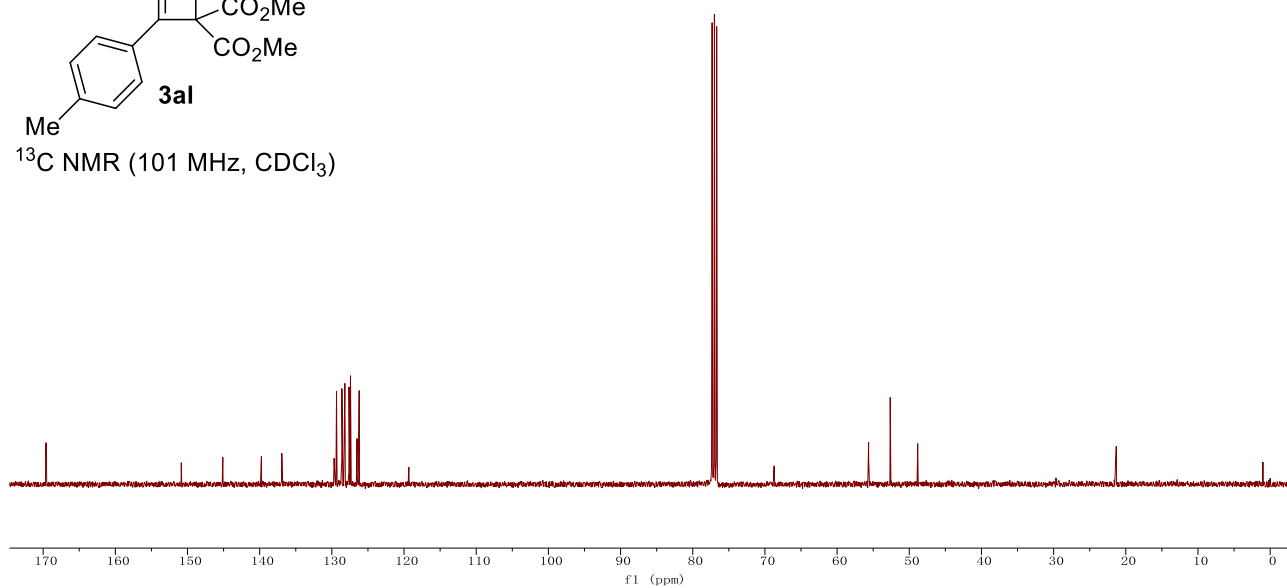

7.386  
7.368  
7.361  
7.358  
7.341  
7.336  
7.322  
7.314  
7.308  
7.303  
7.293  
7.287  
7.280  
7.261  
7.247  
7.242  
7.219  
7.199  
4.888  
4.872  
4.797  
4.590  
4.574  
4.558

3.703

2.929  
2.912  
2.895  
2.878  
2.860

1.257  
1.239

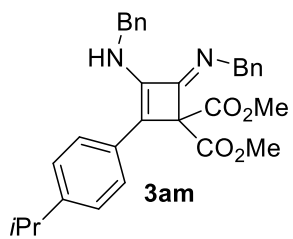

$^1\text{H NMR}$  (400 MHz,  $\text{CDCl}_3$ )

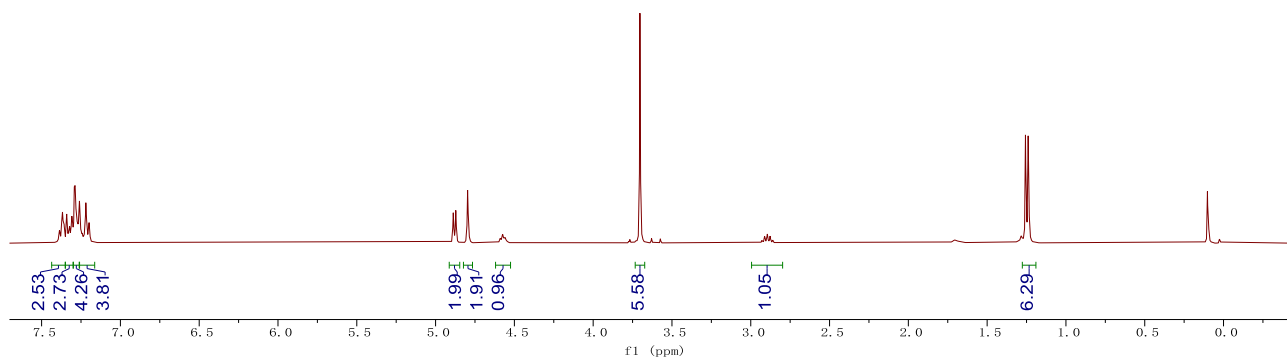

169.61  
150.89  
147.79  
145.14  
139.80  
130.04  
128.59  
128.25  
128.19  
127.58  
127.41  
127.36  
126.75  
126.50  
126.25  
119.33  
68.66  
55.63  
52.65  
48.82  
33.92  
23.78

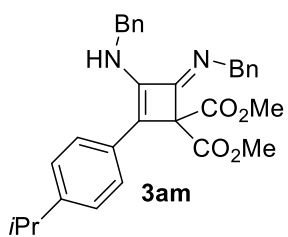

$^{13}\text{C NMR}$  (101 MHz,  $\text{CDCl}_3$ )

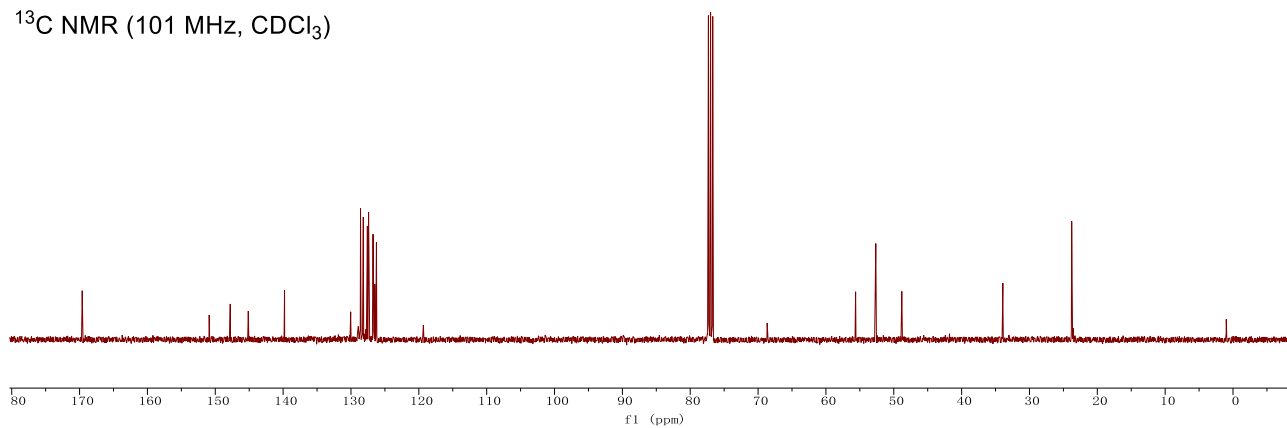

7.574  
7.560  
7.357  
7.350  
7.344  
7.331  
7.323  
7.321  
7.311  
7.298  
7.272  
7.247  
7.235  
7.223

4.927  
4.917  
4.819  
4.805

3.711

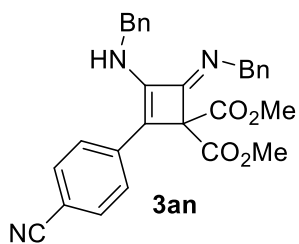

<sup>1</sup>H NMR (600 MHz, CDCl<sub>3</sub>)

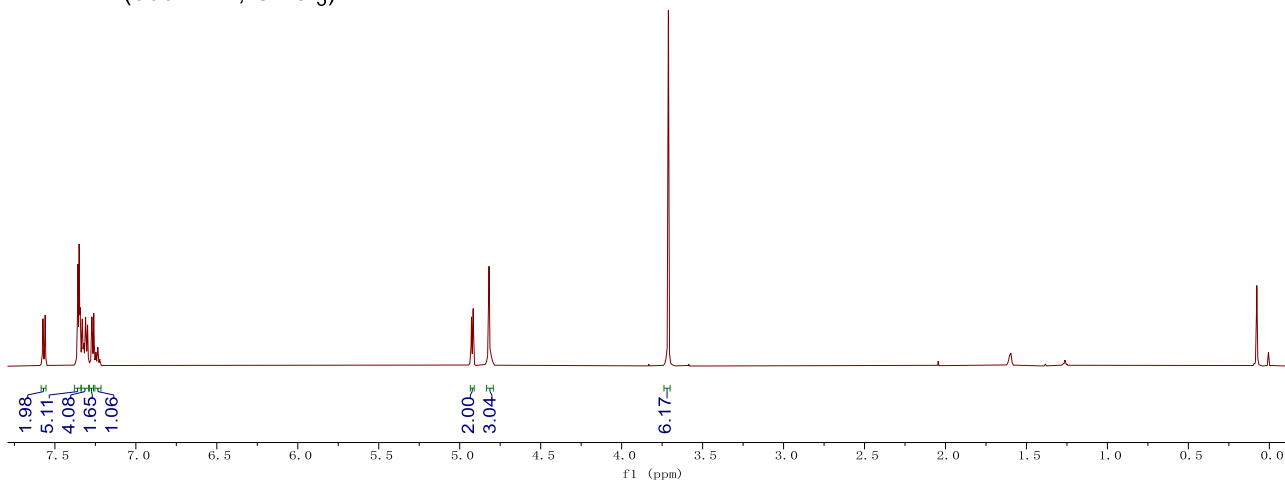

169.04  
150.32  
147.68  
139.22  
138.83  
136.96  
132.29  
128.78  
128.30  
127.74  
127.65  
127.38  
126.74  
126.07  
119.00  
115.65  
109.01

68.80

55.93  
52.91  
48.95

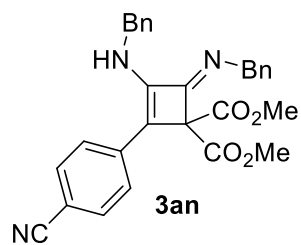

<sup>13</sup>C NMR (151 MHz, CDCl<sub>3</sub>)

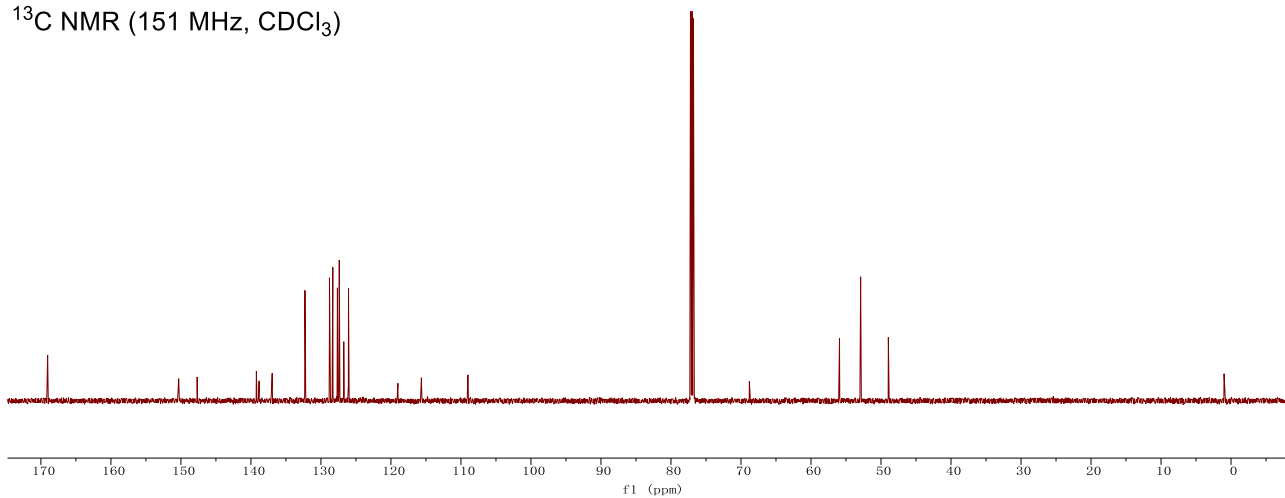

8.176  
8.169  
8.164  
8.152  
8.147  
8.141  
7.391  
7.384  
7.379  
7.367  
7.362  
7.356  
7.337  
7.334  
7.331  
7.321  
7.316  
7.313  
7.299  
7.279  
7.260  
7.244  
7.238  
7.225  
7.221  
4.965  
4.958  
4.947  
4.937  
4.926  
4.917  
4.907  
4.836  
3.722

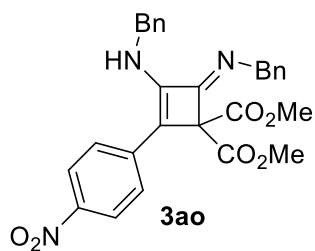

$^1\text{H NMR}$  (400 MHz,  $\text{CDCl}_3$ )

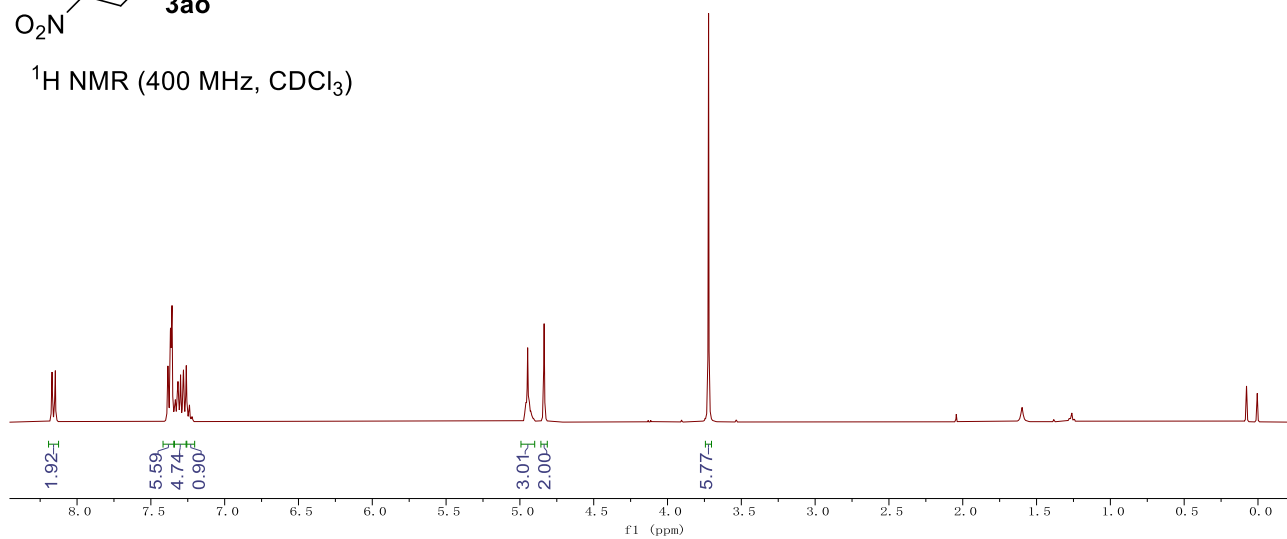

168.95  
150.31  
148.19  
145.10  
139.15  
139.04  
138.70  
128.82  
128.32  
127.80  
127.67  
127.40  
126.78  
125.97  
124.11  
115.25  
68.93  
56.02  
52.95  
49.01

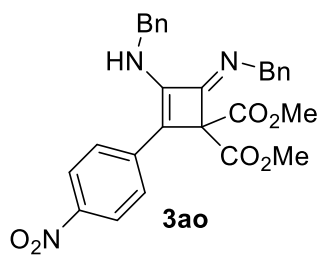

$^{13}\text{C NMR}$  (101 MHz,  $\text{CDCl}_3$ )

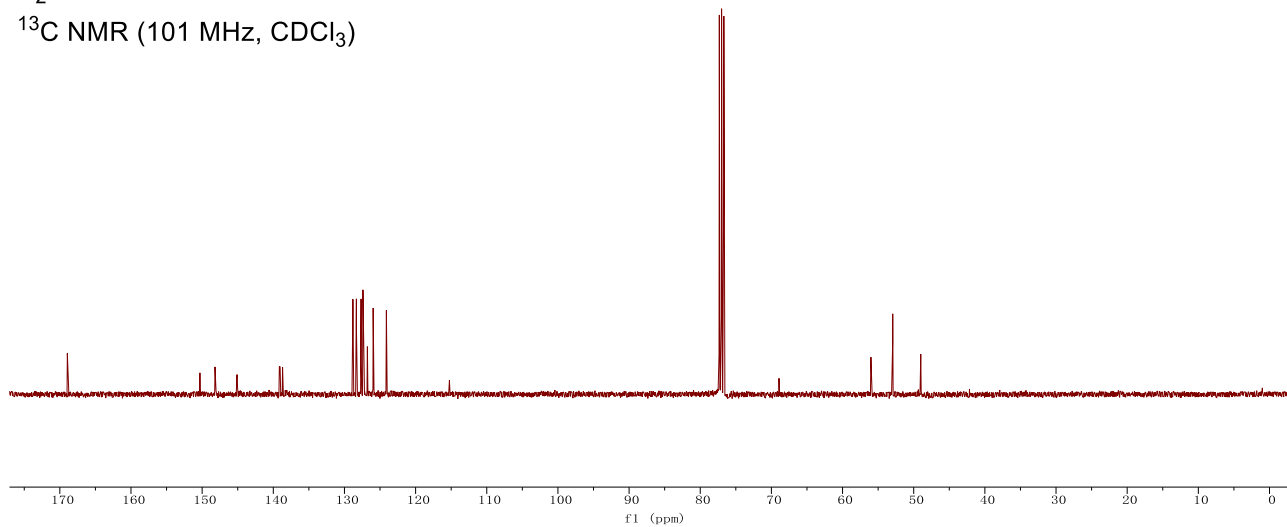

7.370  
7.367  
7.356  
7.344  
7.340  
7.332  
7.319  
7.306  
7.294  
7.283  
7.280  
7.271  
7.240  
7.237  
7.234  
7.225  
7.216  
7.213  
7.211  
6.614  
4.834  
4.823  
4.783  
4.641  
4.630  
4.619  
3.847  
3.774  
3.714

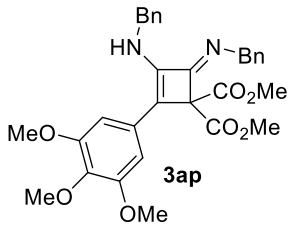

$^1\text{H NMR}$  (600 MHz,  $\text{CDCl}_3$ )

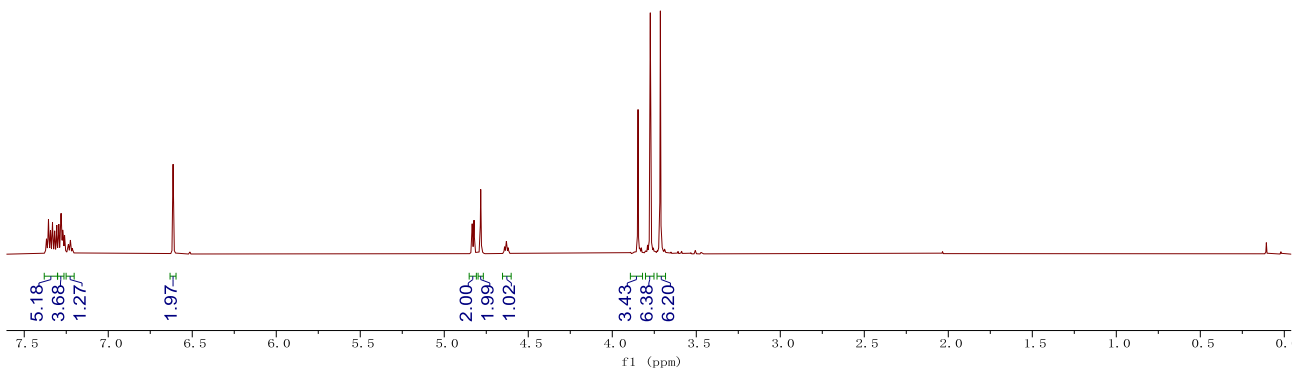

169.39  
153.19  
150.52  
145.29  
139.52  
139.50  
137.51  
128.53  
128.13  
127.97  
127.33  
127.26  
127.14  
126.50  
119.33  
104.12  
69.02  
60.76  
56.02  
55.54  
52.59  
48.48

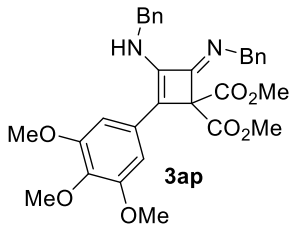

$^{13}\text{C NMR}$  (151 MHz,  $\text{CDCl}_3$ )

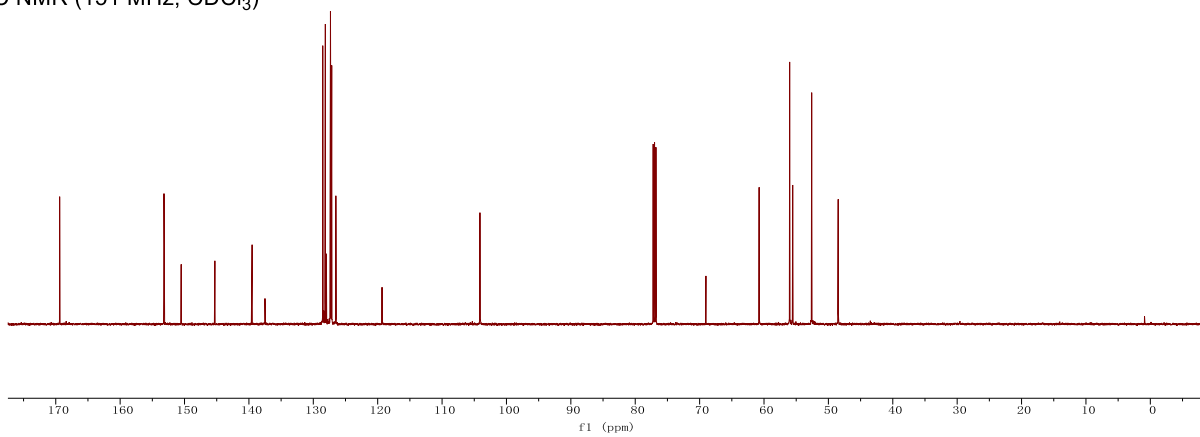

7.801  
7.786  
7.780  
7.484  
7.481  
7.470  
7.467  
7.461  
7.457  
7.448  
7.446  
7.428  
7.416  
7.385  
7.373  
7.370  
7.360  
7.353  
7.340  
7.329  
7.317  
7.306  
7.271  
7.268  
7.256  
7.251  
7.246  
7.242  
4.955  
4.945  
4.866  
4.835  
4.825  
4.815  
3.730

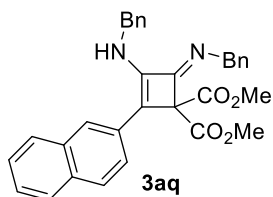

<sup>1</sup>H NMR (600 MHz, CDCl<sub>3</sub>)

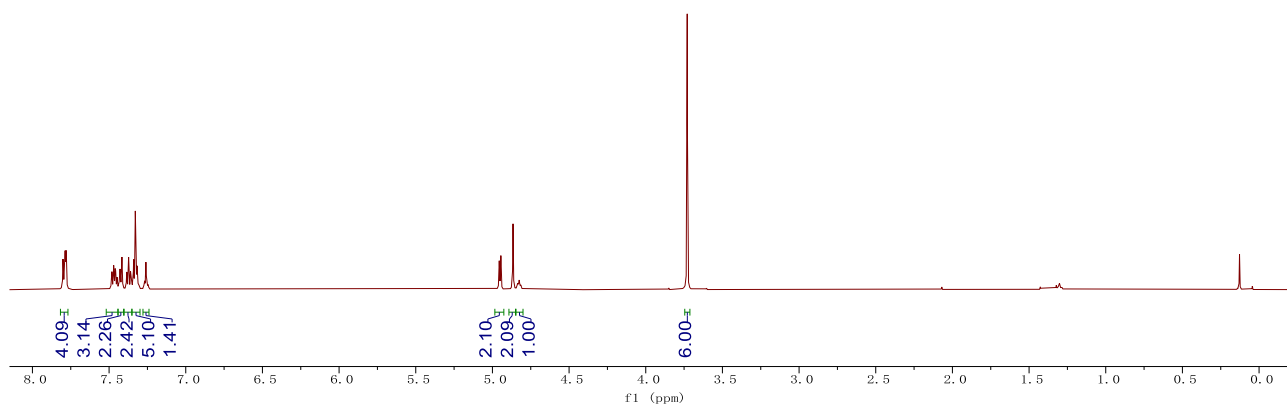

169.57  
150.82  
145.93  
139.63  
139.59  
133.36  
132.05  
130.03  
128.60  
128.20  
128.17  
128.02  
127.58  
127.56  
127.39  
126.54  
126.40  
126.05  
125.07  
124.09  
118.84  
68.85  
55.68  
52.71  
48.79

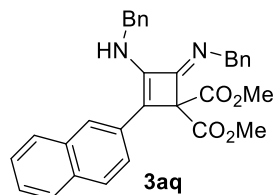

<sup>13</sup>C NMR (151 MHz, CDCl<sub>3</sub>)

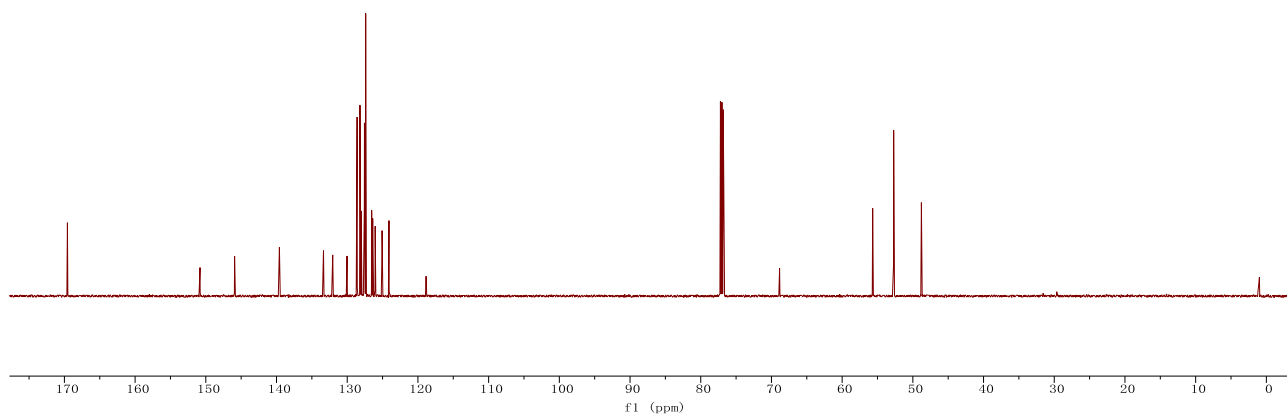

7.405  
7.362  
7.349  
7.331  
7.319  
7.306  
7.301  
7.289  
7.270  
7.259  
7.247  
7.237  
7.216  
7.204  
7.192  
6.407  
6.404  
6.334  
6.329  
4.926  
4.915  
4.904  
4.835  
4.824  
4.780  
3.699

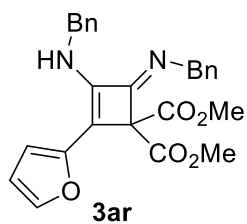

$^1\text{H NMR}$  (600 MHz,  $\text{CDCl}_3$ )

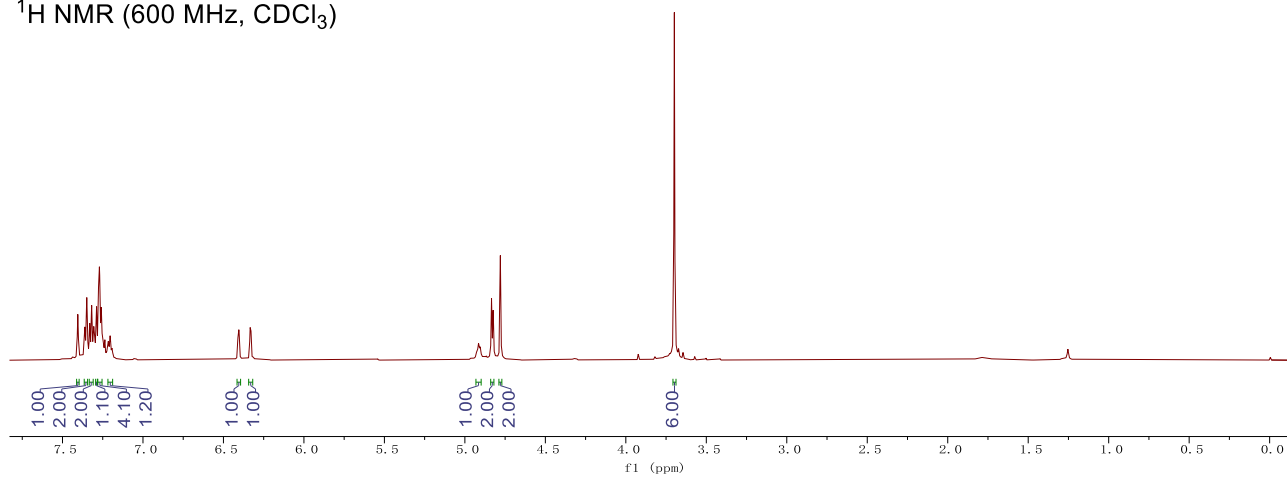

168.94  
150.24  
148.44  
143.33  
142.54  
139.70  
139.49  
128.59  
128.24  
127.71  
127.49  
127.38  
126.58  
111.83  
108.50  
107.77  
67.82  
55.70  
52.69  
48.59

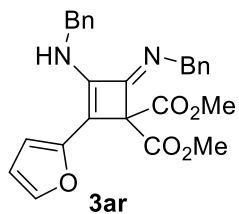

$^{13}\text{C NMR}$  (151 MHz,  $\text{CDCl}_3$ )

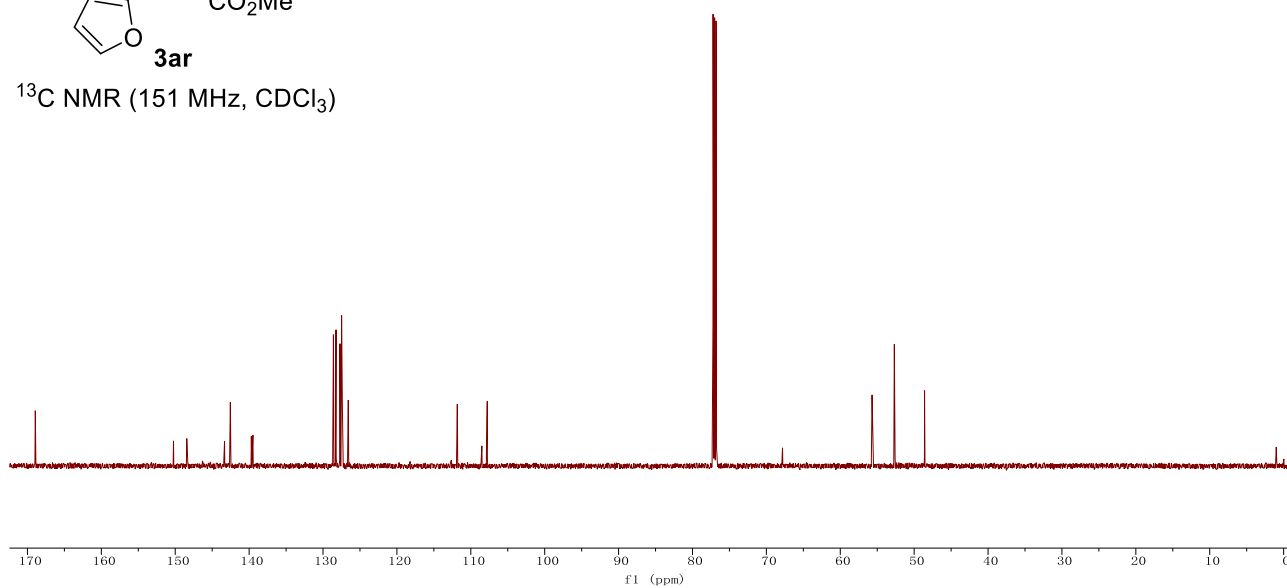



7.379  
7.376  
7.364  
7.353  
7.349  
7.341  
7.327  
7.314  
7.301  
7.295  
7.293  
7.289  
7.286  
7.285  
7.280  
7.277  
7.266  
7.235  
7.232  
7.229  
7.223  
7.220  
7.211  
7.208  
7.078  
7.076  
7.072  
7.070  
7.040  
7.034  
7.032  
7.026  
4.900  
4.889  
4.799  
4.450  
4.439  
4.428  
3.714  
3.696

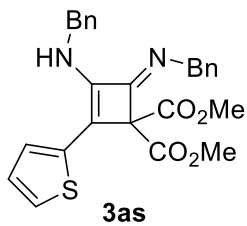

$^1\text{H}$  NMR (600 MHz,  $\text{CDCl}_3$ )

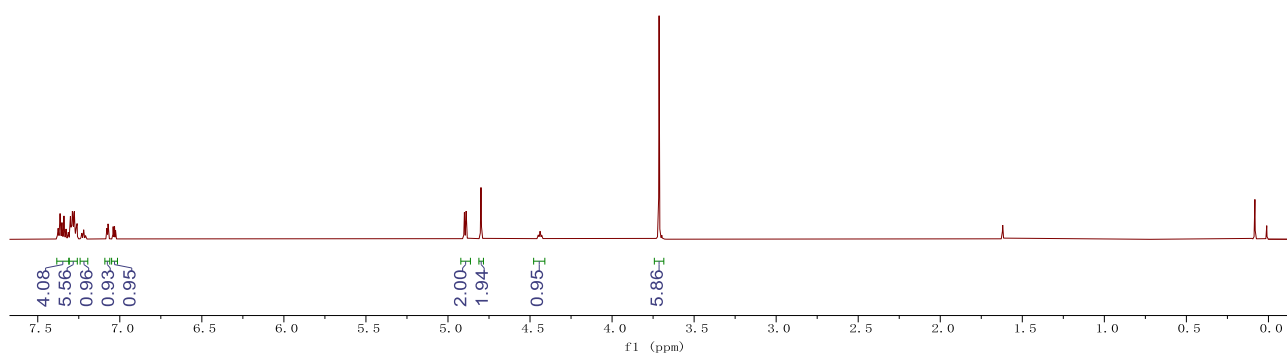

169.00  
150.26  
143.65  
139.71  
139.50  
134.62  
128.63  
128.21  
127.73  
127.54  
127.42  
127.41  
126.54  
124.85  
124.63  
113.50  
69.20  
55.73  
52.71  
48.69

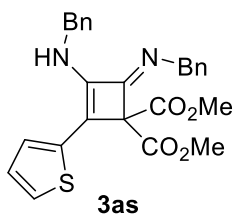

$^{13}\text{C}$  NMR (151 MHz,  $\text{CDCl}_3$ )

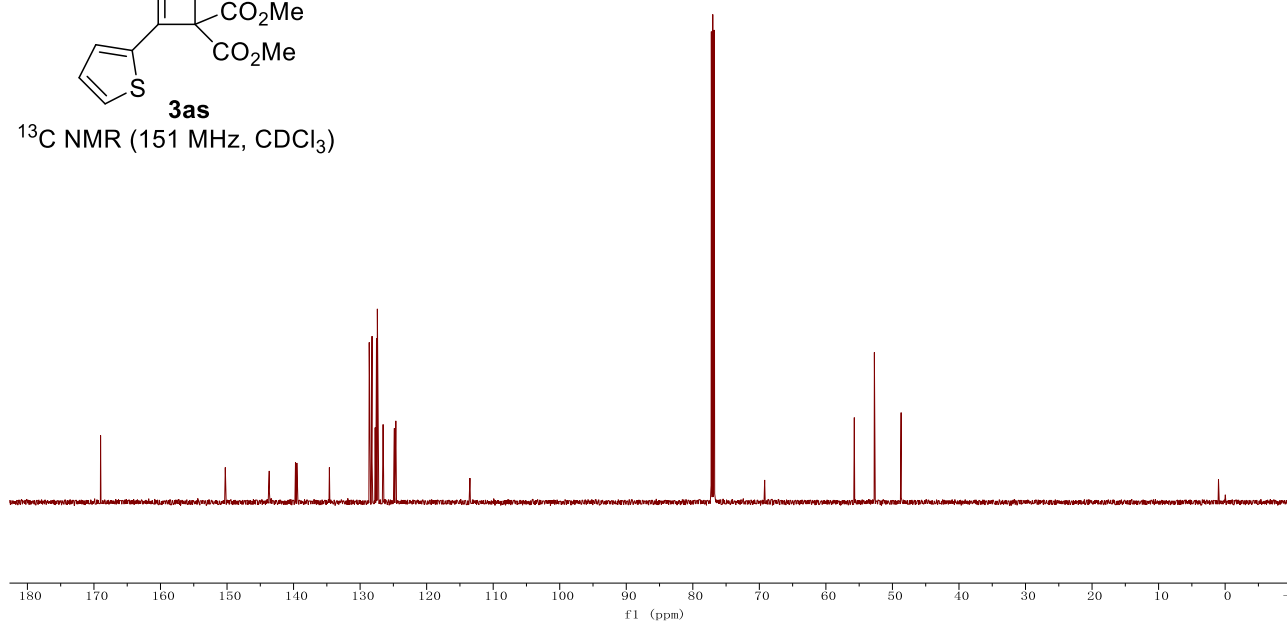

7.761  
7.739  
7.717  
7.410  
7.405  
7.400  
7.389  
7.385  
7.379  
7.376  
7.371  
7.359  
7.354  
7.339  
7.336  
7.330  
7.319  
7.316  
7.297  
7.276  
7.274  
7.271  
7.268  
7.260  
7.254  
7.250  
7.243  
7.232  
7.224  
7.215  
4.960  
4.945  
4.832  
4.674  
4.658  
4.642  
3.738

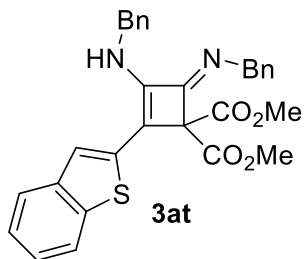

$^1\text{H NMR}$  (400 MHz,  $\text{CDCl}_3$ )

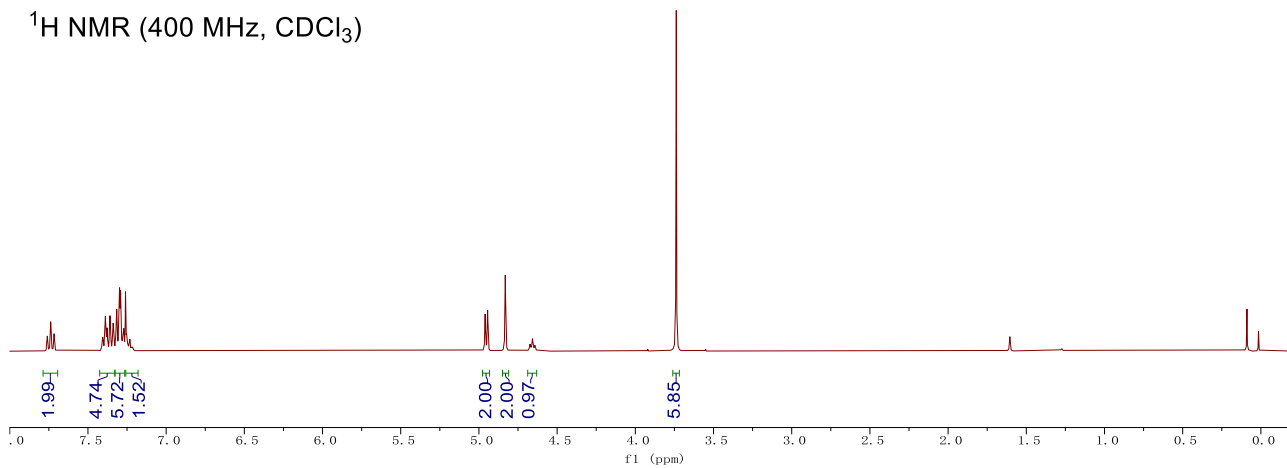

168.95  
150.28  
145.38  
139.86  
139.57  
139.30  
139.21  
134.08  
128.69  
128.24  
127.57  
127.52  
127.42  
126.61  
124.75  
124.31  
123.72  
121.90  
120.65  
112.98

69.24

55.87  
52.81  
48.83

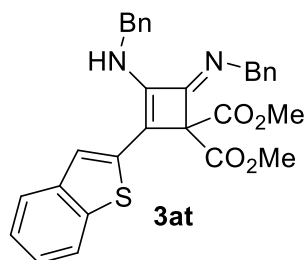

$^{13}\text{C NMR}$  (101 MHz,  $\text{CDCl}_3$ )

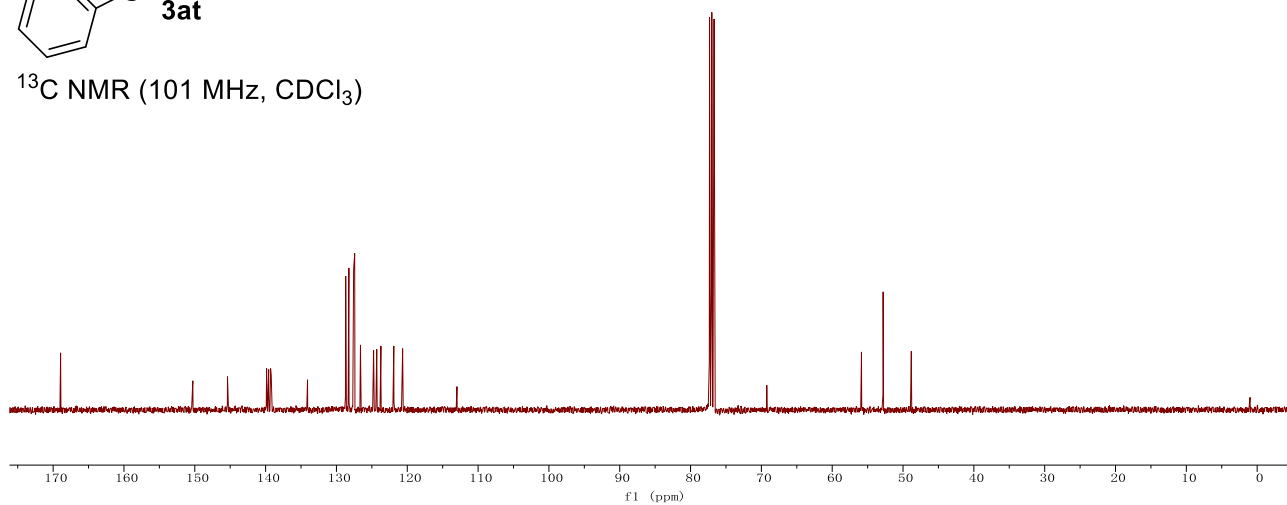

7.395  
7.387  
7.382  
7.333  
7.317  
7.312  
7.297  
7.291  
7.281  
7.243  
7.227  
7.218  
7.212  
7.204  
7.196  
7.188  
7.181  
7.175  
7.168  
6.849  
6.810  
6.656  
6.617  
4.931  
4.916  
4.901  
4.759  
4.627  
4.612  
3.760

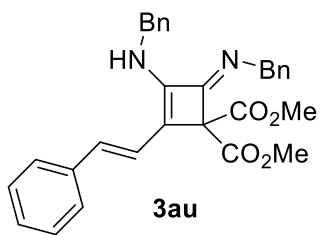

$^1\text{H}$  NMR (400 MHz,  $\text{CDCl}_3$ )

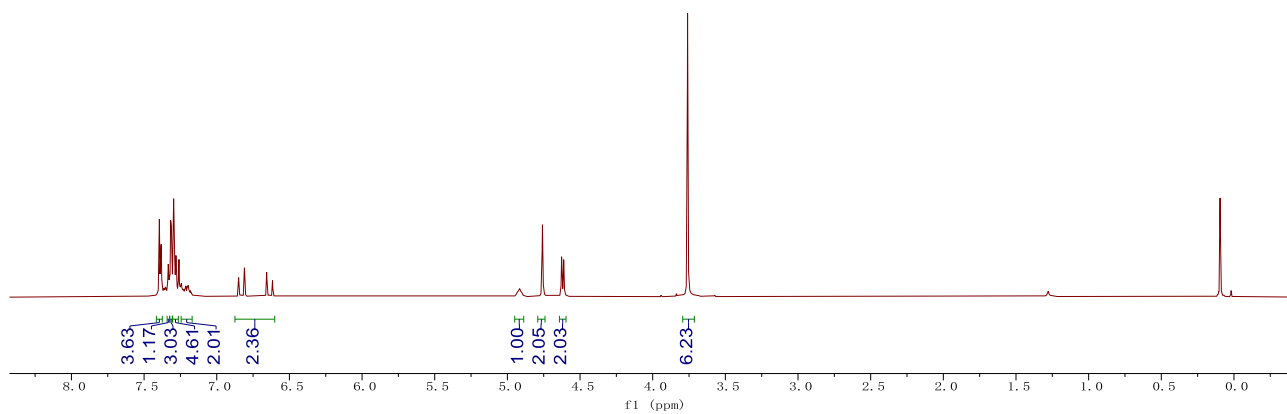

169.12  
150.56  
145.27  
139.44  
138.10  
137.35  
130.12  
128.79  
128.53  
128.33  
127.73  
127.68  
127.50  
127.41  
126.74  
126.36  
119.18  
117.90

68.82

55.67  
52.70  
48.54

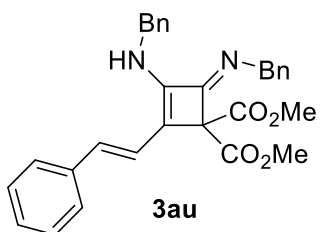

$^{13}\text{C}$  NMR (101 MHz,  $\text{CDCl}_3$ )

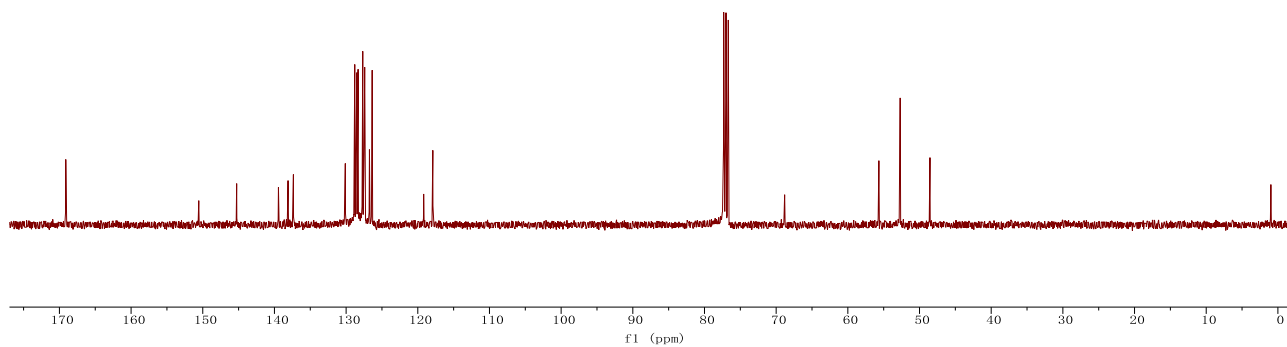

7.342  
7.335  
7.334  
7.297  
7.284  
7.272  
7.245  
7.234  
7.213  
7.201  
7.189

4.627  
4.579  
4.571  
— 4.173

— 3.700

2.475  
2.456  
2.436  
1.749  
1.723  
1.640  
1.622  
1.369  
1.349  
1.328  
1.310  
1.263  
1.223  
1.203  
1.181  
1.161  
1.145  
1.124

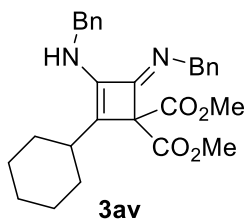

$^1\text{H}$  NMR (600 MHz,  $\text{CDCl}_3$ )

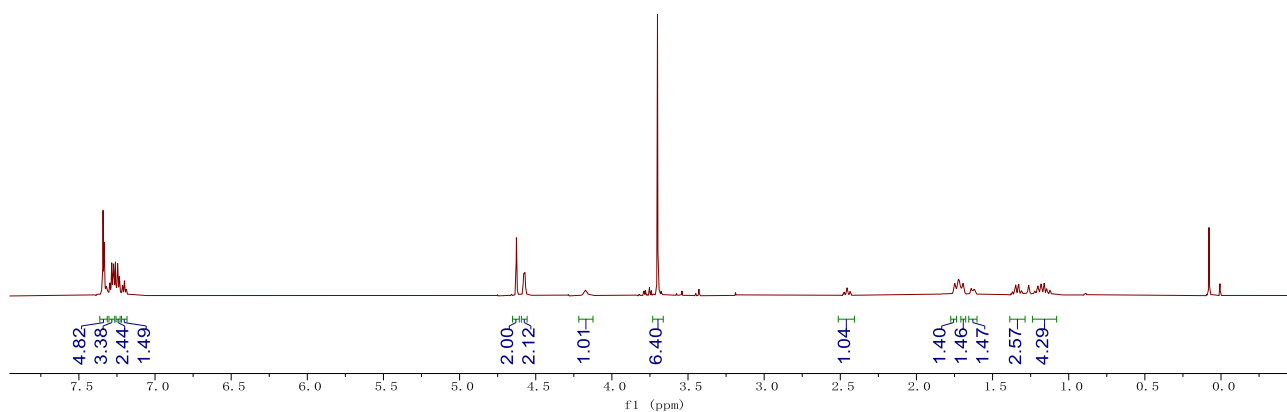

— 170.24  
— 151.31  
— 146.06  
— 139.75  
— 139.66  
— 128.55  
— 128.19  
— 127.63  
— 127.47  
— 127.41  
— 127.29  
— 126.51

— 68.48

— 55.31  
— 52.44  
— 48.47

— 38.07

— 30.83  
— 26.25  
— 25.82

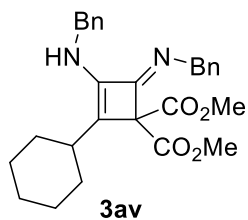

$^{13}\text{C}$  NMR (151 MHz,  $\text{CDCl}_3$ )

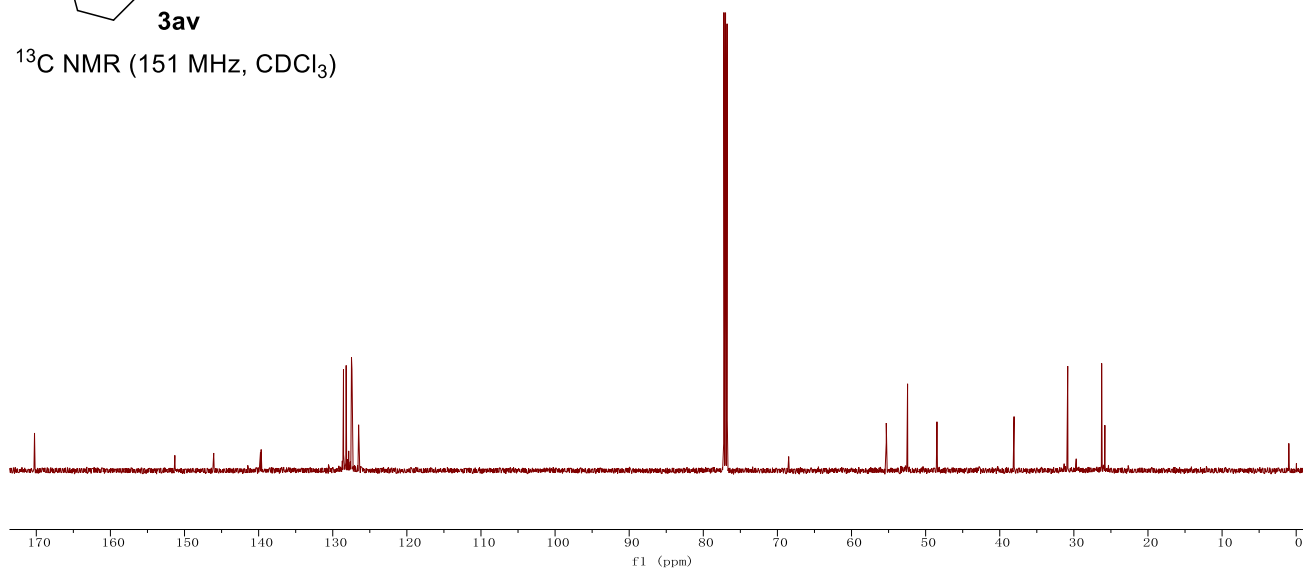

7.418  
7.415  
7.406  
7.403  
7.393  
7.390  
7.360  
7.347  
7.338  
7.335  
7.325  
7.323  
7.319  
7.311  
7.309  
7.300  
7.289  
7.277  
7.275  
7.257  
7.250  
7.246  
7.238  
7.234  
7.229  
7.226  
7.220  
7.217  
7.215  
7.208  
7.206  
7.194  
7.101  
7.099  
7.088  
7.086  
7.080  
7.078  
7.076  
7.074  
7.068  
7.066  
7.055  
7.053  
7.051  
7.042  
7.039  
7.036  
7.034  
7.025  
7.023  
7.020  
4.920  
4.909  
4.825  
4.689  
4.678  
3.696

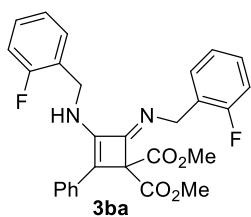

<sup>1</sup>H NMR(600 MHz,CDCl<sub>3</sub>)

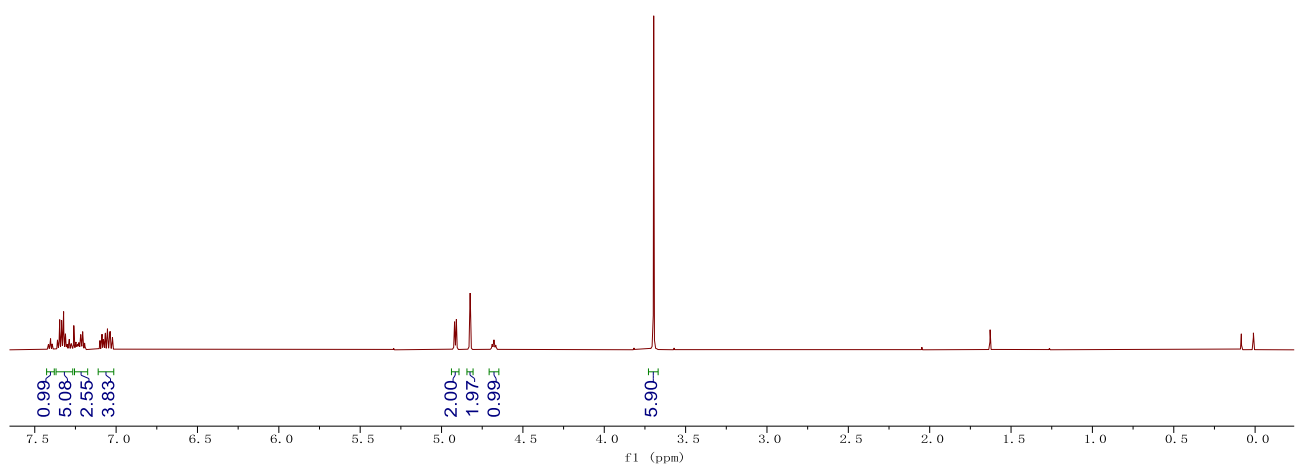

169.34  
161.79  
161.23  
160.16  
159.61  
151.38  
145.36  
132.37  
130.02  
129.99  
129.54  
129.51  
129.16  
129.11  
128.64  
128.18  
128.13  
126.96  
126.83  
126.78  
126.73  
126.68  
126.23  
124.18  
124.16  
123.90  
123.88  
119.46  
115.37  
115.23  
114.97  
114.83  
68.70  
52.70  
49.12  
42.62

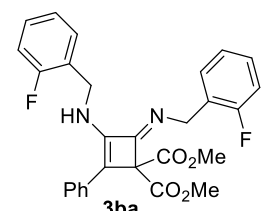

<sup>13</sup>C NMR(151 MHz,CDCl<sub>3</sub>)

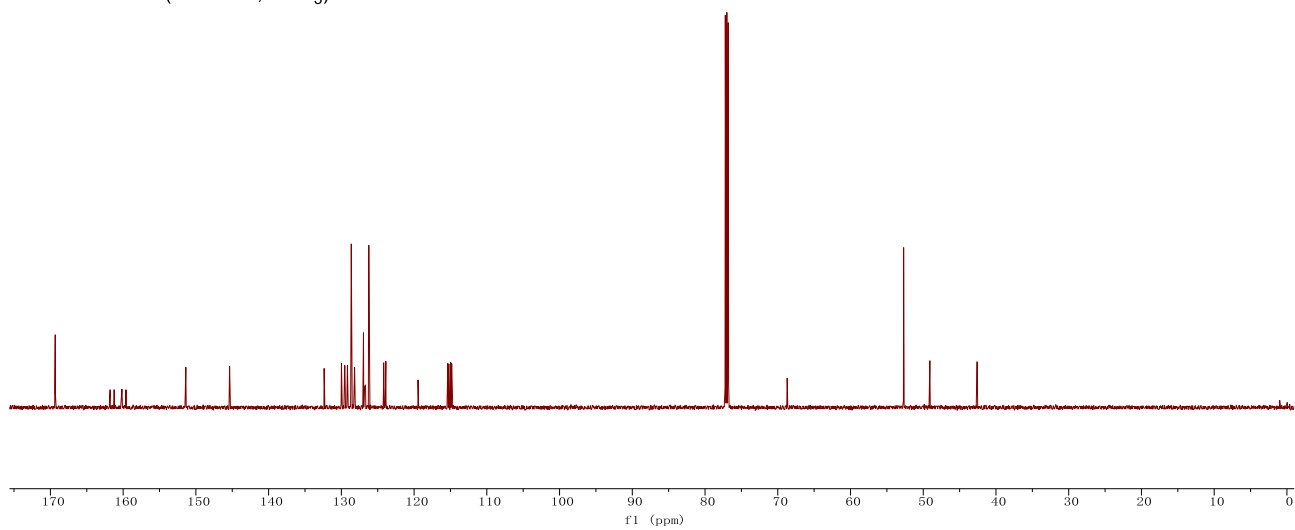

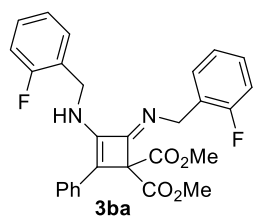

$^{19}\text{F}$  NMR(376 MHz,  $\text{CDCl}_3$ )

-118.95  
-119.16

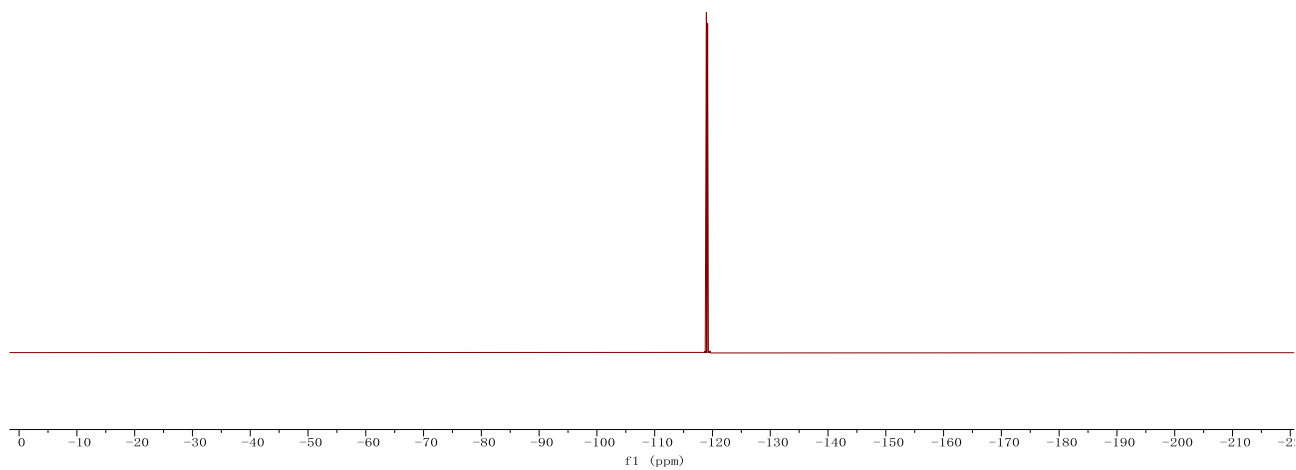

7.570  
7.566  
7.559  
7.555  
7.550  
7.546  
7.539  
7.536  
7.513  
7.508  
7.494  
7.489  
7.359  
7.353  
7.337  
7.334  
7.318  
7.304  
7.299  
7.285  
7.281  
7.271  
7.268  
7.253  
7.249  
7.244  
7.241  
7.223  
7.217  
7.212  
7.206  
7.203  
7.200  
7.196  
7.190  
7.169  
7.164  
7.149  
7.145  
7.130  
7.126  
7.121  
7.108  
7.106  
7.103  
7.101  
7.088  
7.083  
4.969  
4.833  
3.668

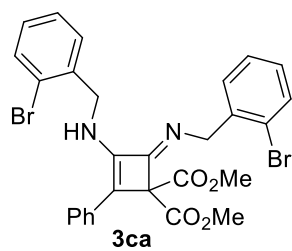

$^1\text{H NMR}$  (400 MHz,  $\text{CDCl}_3$ )

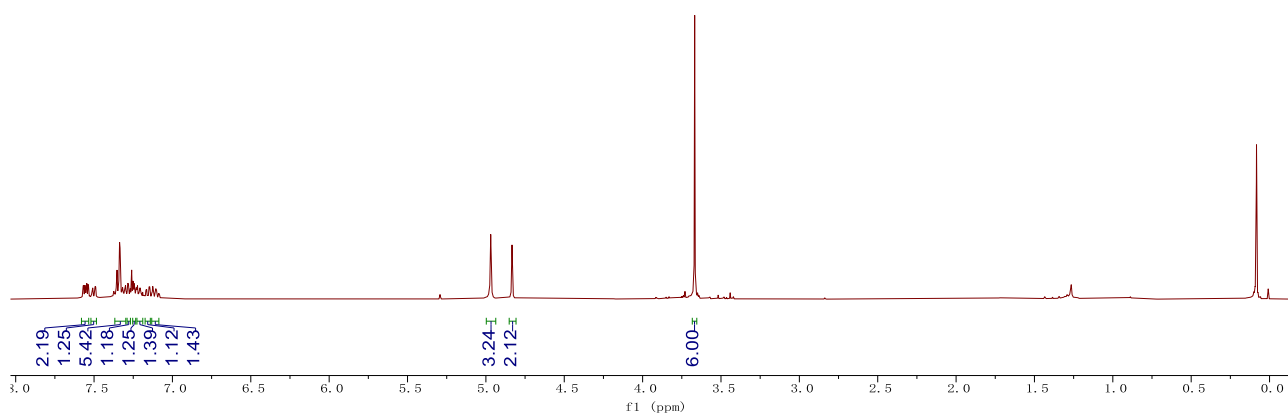

169.24  
151.46  
145.17  
138.98  
138.78  
132.73  
132.32  
132.24  
129.97  
129.02  
129.00  
128.67  
128.02  
127.62  
127.21  
126.97  
126.17  
123.46  
123.00  
119.59

68.73

55.37

52.69

48.57

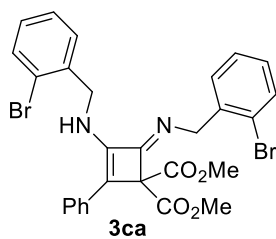

$^{13}\text{C NMR}$  (101 MHz,  $\text{CDCl}_3$ )

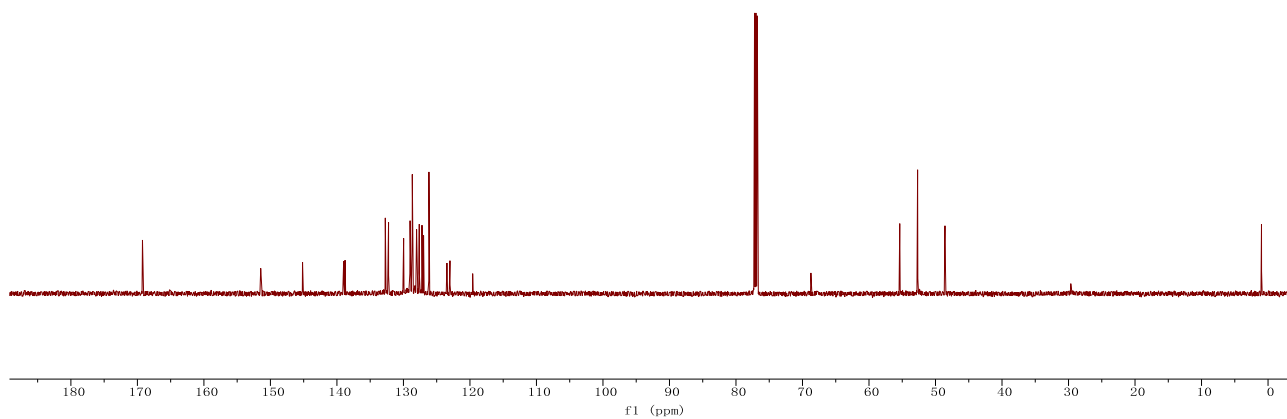

7.354  
7.342  
7.340  
7.332  
7.328  
7.316  
7.314  
7.310  
7.302  
7.300  
7.238  
7.235  
7.226  
7.221  
7.214  
7.211  
7.209  
7.206  
7.197  
7.188  
7.185  
7.183  
7.178  
7.168  
7.165  
7.158  
7.156  
7.151  
7.149  
7.146  
7.141  
7.137  
7.134  
7.131  
7.124  
7.119  
7.114  
4.896  
4.885  
4.752  
4.472  
4.462  
4.452  
3.684  
2.361  
2.346

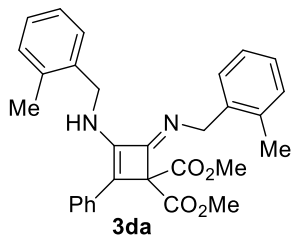

$^1\text{H NMR}$  (600 MHz,  $\text{CDCl}_3$ )

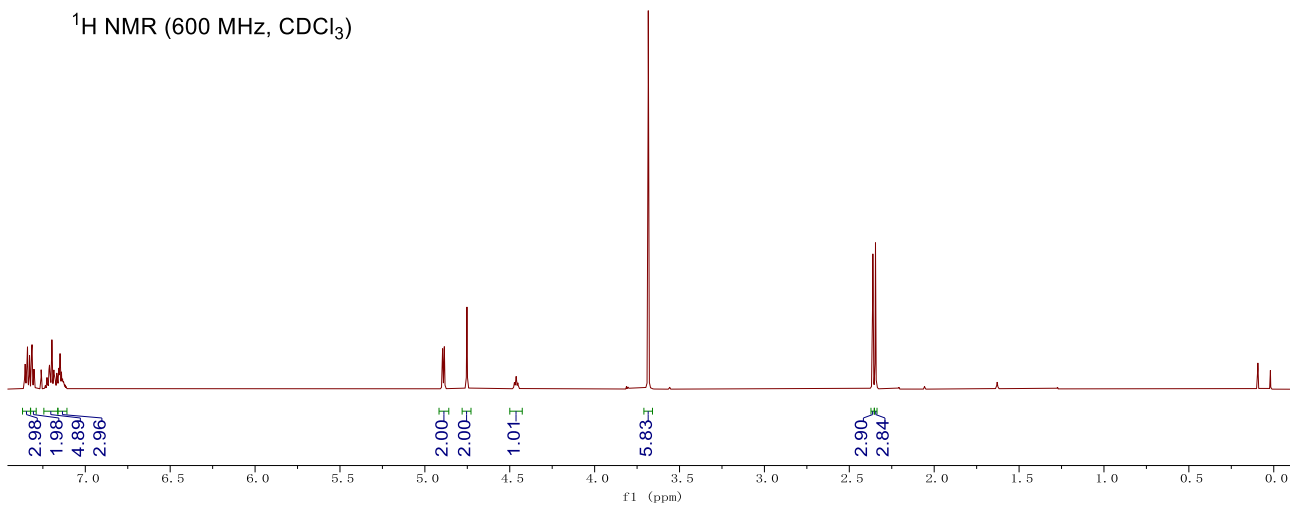

169.56  
150.60  
145.79  
137.82  
137.25  
136.44  
135.77  
132.59  
130.48  
129.82  
128.60  
127.97  
127.58  
127.42  
126.70  
126.58  
126.11  
125.77  
118.37  
68.76  
53.56  
52.62  
46.97  
19.10  
19.02

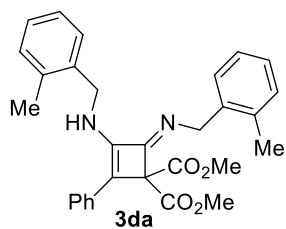

$^{13}\text{C NMR}$  (151 MHz,  $\text{CDCl}_3$ )

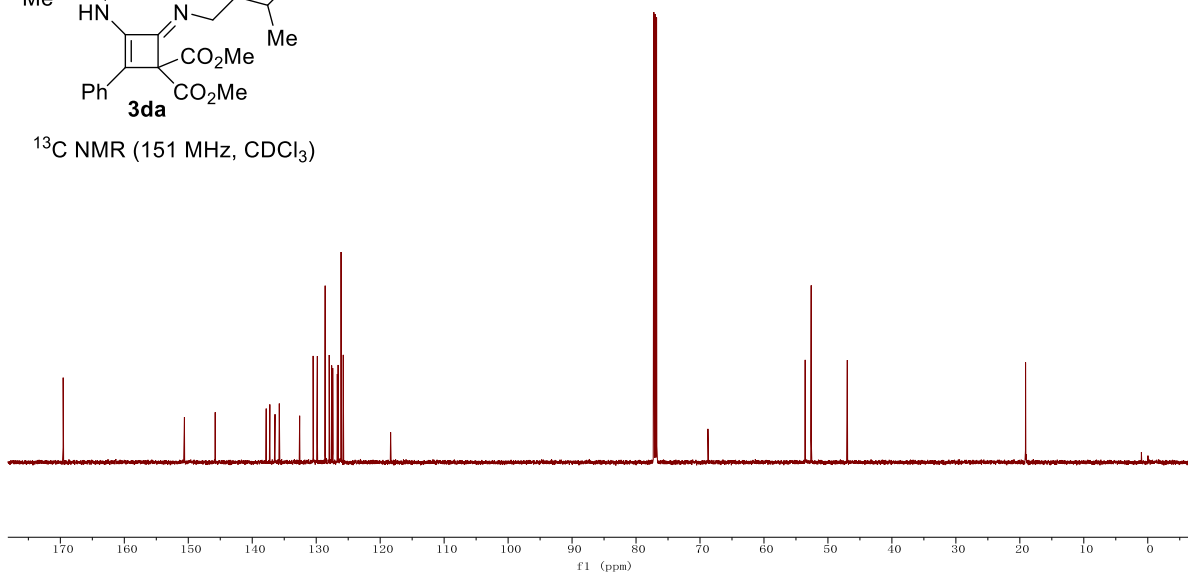



7.357  
7.343  
7.336  
7.327  
7.320  
7.305  
7.281  
7.276  
7.260  
7.243  
7.225  
7.207  
7.202  
7.199  
7.193  
7.184  
7.177  
7.170  
7.162  
7.156  
6.940  
6.922  
6.903  
6.885  
6.867  
6.861  
4.989  
4.973  
4.957  
4.871  
4.854  
4.802  
3.863  
3.849  
3.637

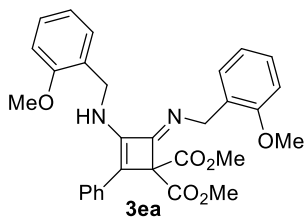

<sup>1</sup>H NMR (400 MHz, CDCl<sub>3</sub>)

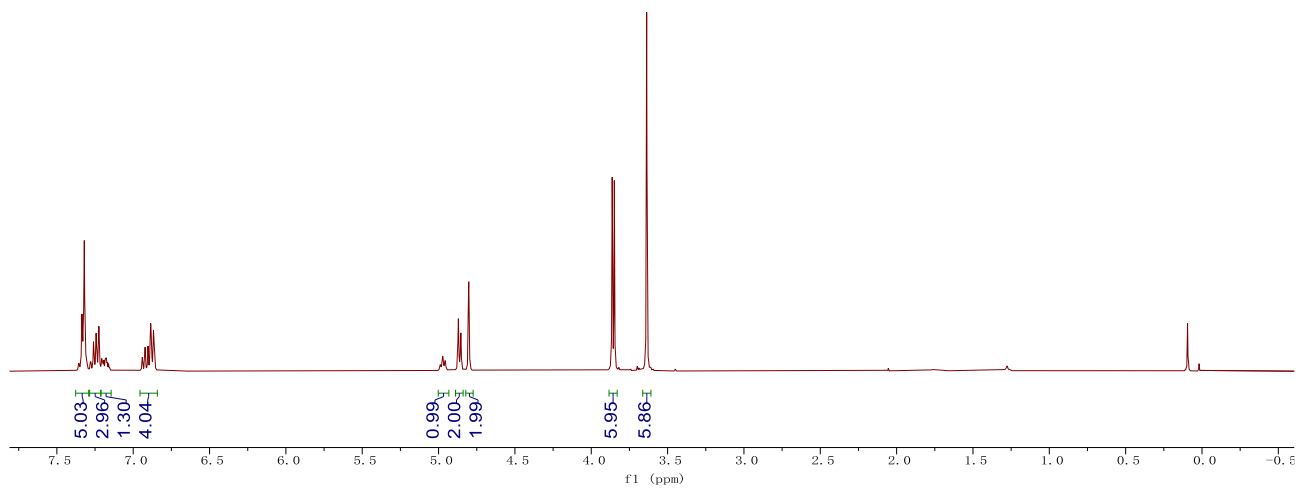

169.56  
157.52  
156.74  
151.06  
146.24  
132.83  
129.58  
128.63  
128.49  
128.28  
128.25  
127.89  
127.42  
126.43  
126.04  
120.51  
120.28  
118.32  
110.25  
109.87  
68.66  
55.30  
55.23  
52.48  
50.18  
44.61

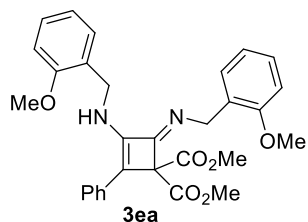

<sup>13</sup>C NMR (101 MHz, CDCl<sub>3</sub>)

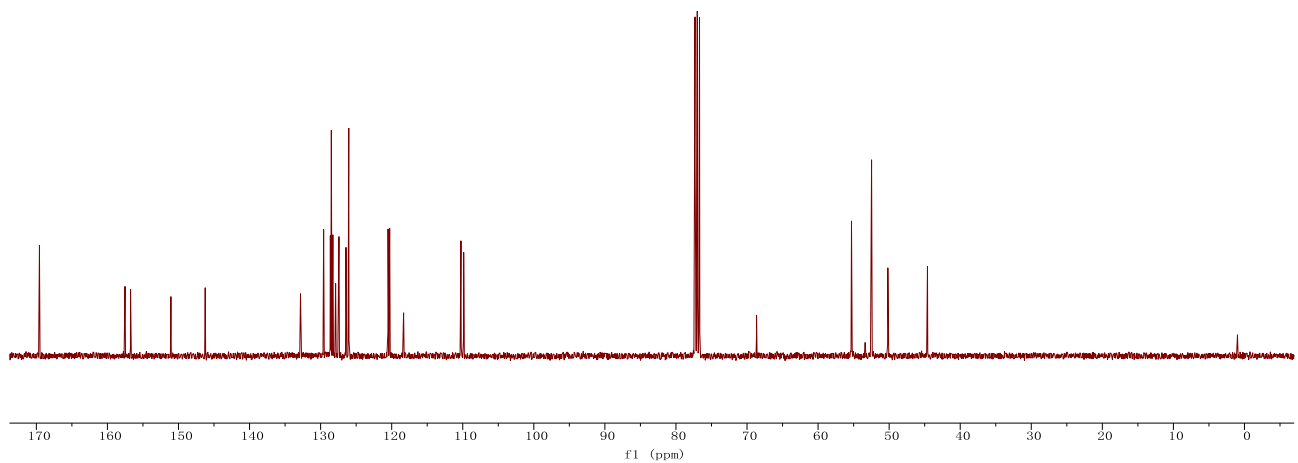

7.364  
7.351  
7.339  
7.319  
7.306  
7.261  
7.251  
7.228  
7.216  
7.207  
7.195  
7.130  
7.118

4.853  
4.842  
4.750  
4.684  
4.673  
4.662

— 3.712

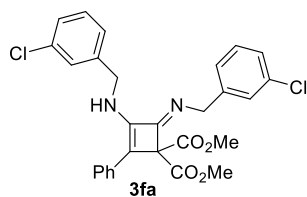

<sup>1</sup>H NMR (600 MHz, CDCl<sub>3</sub>)

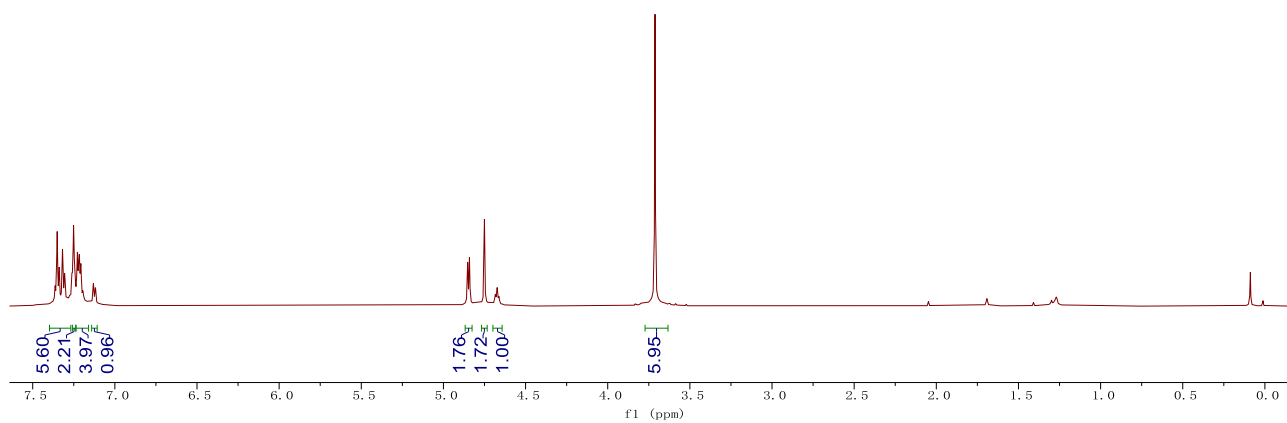

— 169.33

— 151.33

145.16

141.80

141.61

134.47

134.08

132.25

129.89

129.48

128.68

127.55

127.51

127.10

126.75

126.22

125.53

119.61

— 68.63

— 55.10

— 52.78

— 48.05

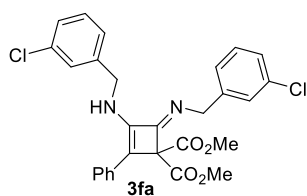

<sup>13</sup>C NMR (151 MHz, CDCl<sub>3</sub>)

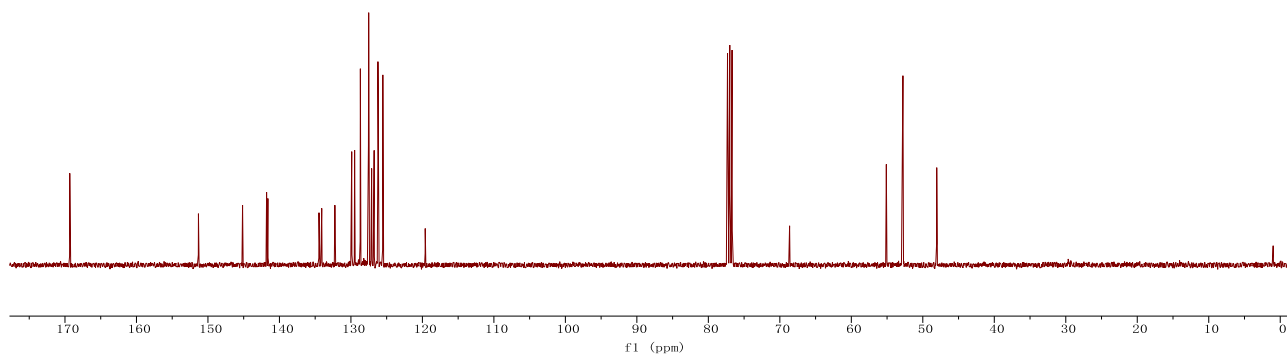

7.501  
7.410  
7.398  
7.364  
7.350  
7.338  
7.316  
7.304  
7.278  
7.264  
7.231  
7.218  
7.213  
7.206  
7.200  
7.187  
7.177  
7.169  
7.156

4.843  
4.832  
4.745  
4.687  
4.676

— 3.716

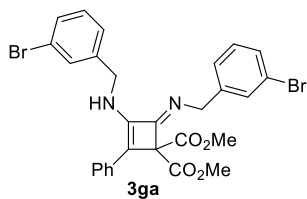

<sup>1</sup>H NMR (600 MHz, CDCl<sub>3</sub>)

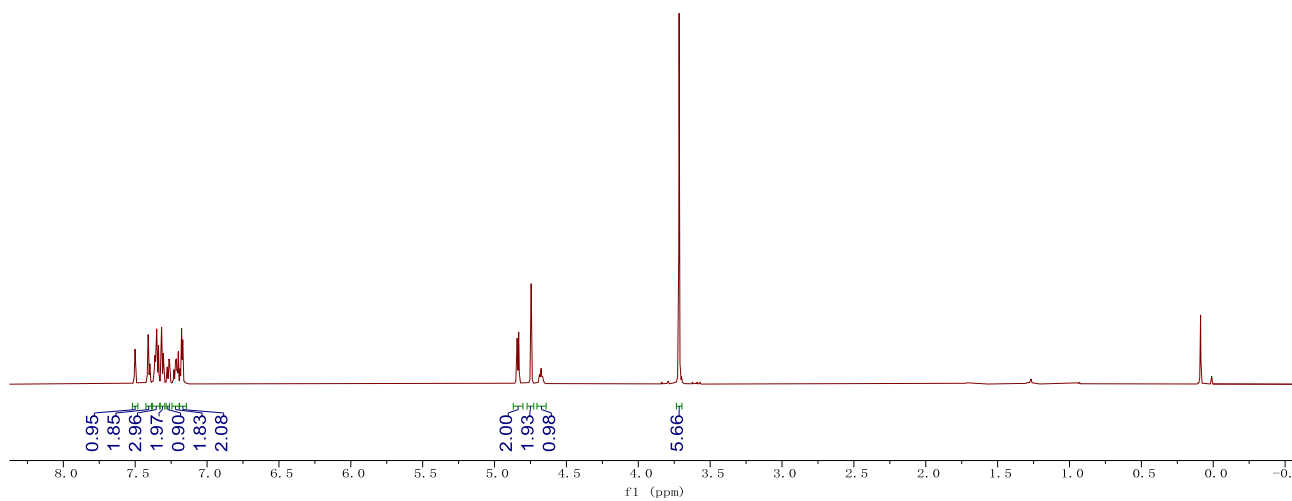

169.39

151.40  
145.15  
142.11  
141.93  
132.28  
130.55  
130.51  
130.50  
130.27  
129.90  
129.75  
128.75  
127.18  
126.28  
126.09  
122.75  
122.42  
119.64

68.66

55.13  
52.90  
48.06

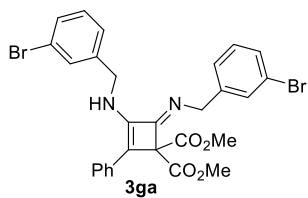

<sup>13</sup>C NMR (151 MHz, CDCl<sub>3</sub>)

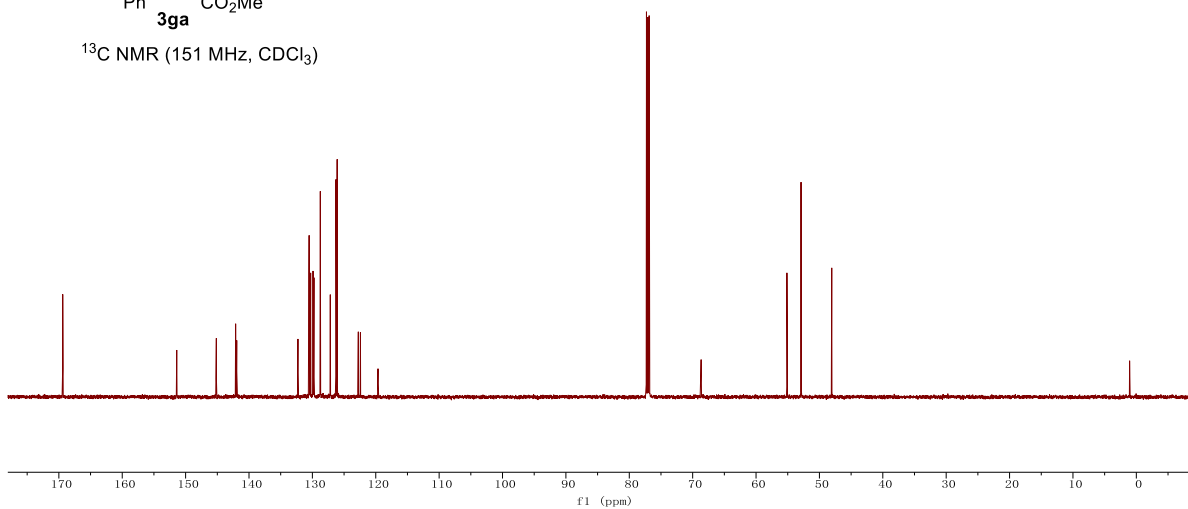

7.357  
7.344  
7.335  
7.332  
7.321  
7.318  
7.313  
7.310  
7.306  
7.301  
7.298  
7.291  
7.287  
7.284  
7.277  
7.274  
7.271  
7.263  
7.227  
7.225  
7.223  
7.216  
7.213  
7.210  
7.203  
7.201  
7.199  
7.168  
7.154  
4.822  
4.811  
4.730  
4.653  
4.642  
4.631  
3.697

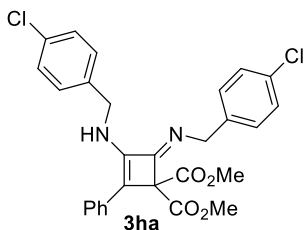

<sup>1</sup>H NMR (600 MHz, CDCl<sub>3</sub>)

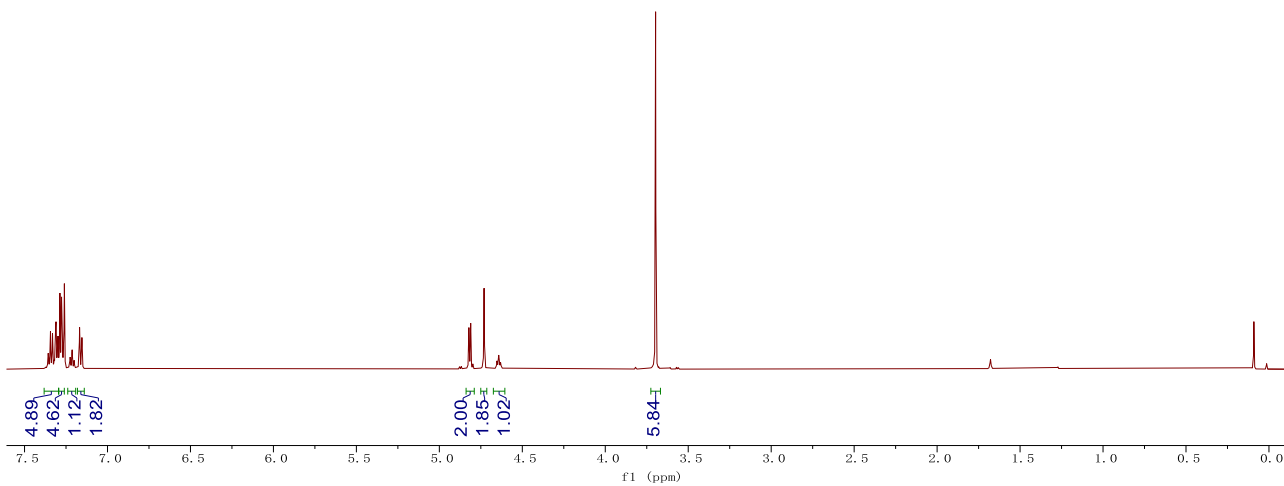

169.36  
151.11  
145.26  
138.20  
138.12  
133.16  
132.31  
132.29  
128.78  
128.72  
128.66  
128.30  
127.07  
126.22  
119.51  
68.70  
54.96  
52.74  
47.95

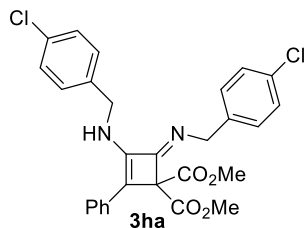

<sup>13</sup>C NMR (151 MHz, CDCl<sub>3</sub>)

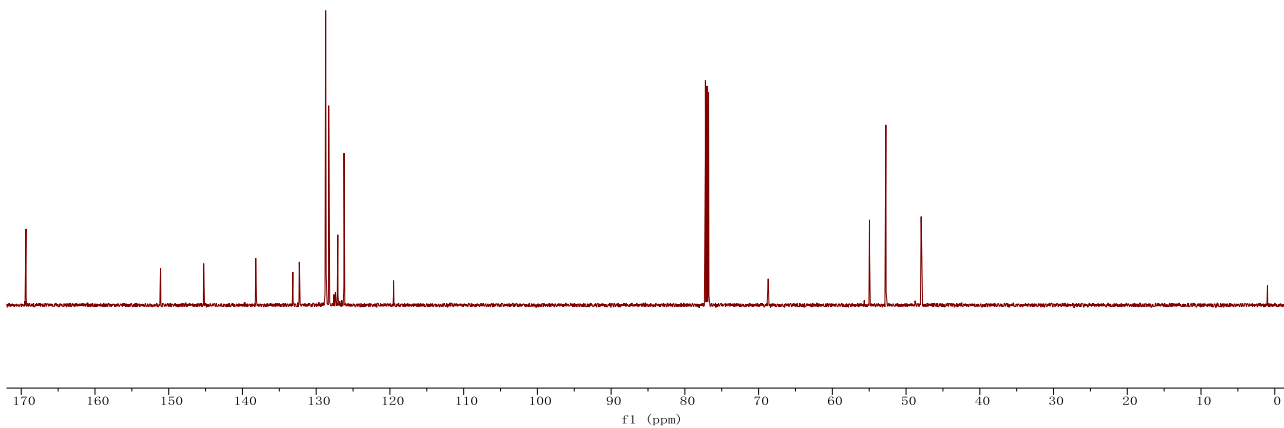

7.342  
7.328  
7.317  
7.311  
7.297  
7.288  
7.274  
7.226  
7.212  
7.202  
7.199  
7.196  
7.187  
7.176  
6.872  
6.868  
6.865  
6.857  
6.854  
4.787  
4.776  
4.734  
4.560  
4.550  
4.539  
3.802  
3.796  
3.718

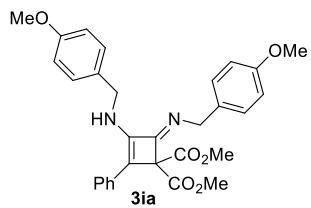

<sup>1</sup>H NMR (600 MHz, CDCl<sub>3</sub>)

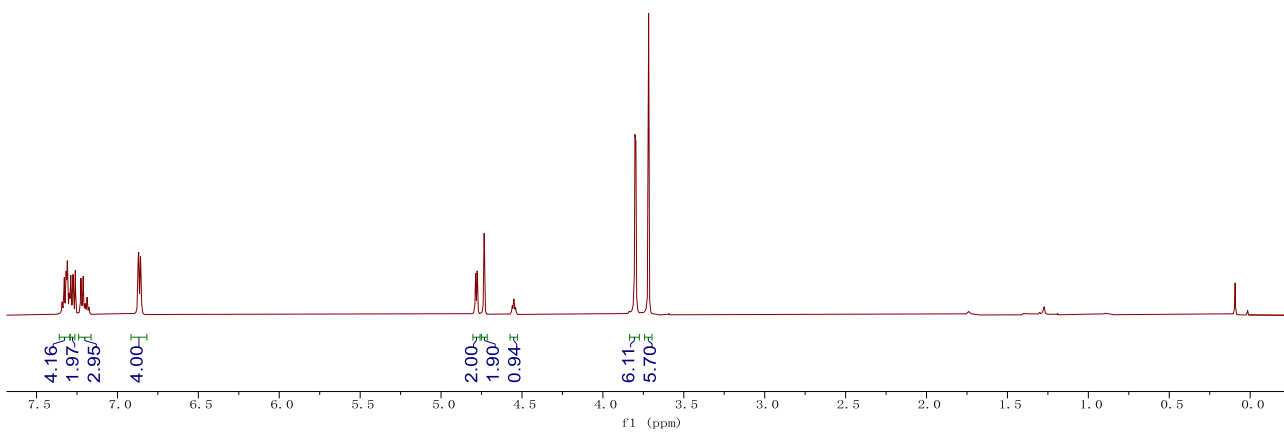

169.59  
158.95  
158.33  
150.52  
145.68  
132.53  
131.81  
131.67  
128.96  
128.75  
128.57  
128.55  
126.69  
126.13  
118.48  
113.94  
113.63  
68.66  
55.24  
55.21  
55.19  
52.68  
48.26

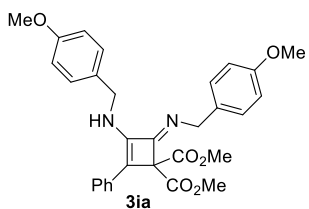

<sup>13</sup>C NMR (151 MHz, CDCl<sub>3</sub>)

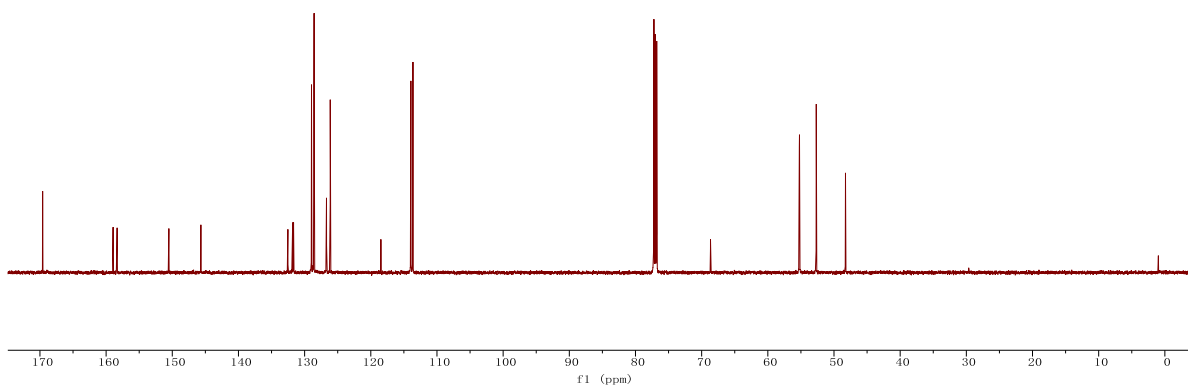

8.319  
7.325  
7.311  
7.309  
7.306  
7.294  
7.283  
7.280  
7.275  
7.270  
7.260  
7.243  
7.173  
7.171  
7.159  
7.150  
7.148  
7.145  
7.139  
7.131  
7.127  
7.119  
7.114  
7.110  
7.106  
7.102  
7.088  
7.075  
7.066  
7.061  
6.684  
6.682  
6.680  
6.678  
6.677  
6.675  
6.608  
6.603  
6.600  
6.598  
5.151  
5.148  
5.137  
5.133  
4.623  
4.613  
3.702

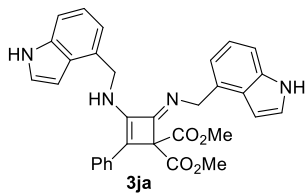

<sup>1</sup>H NMR (600 MHz, CDCl<sub>3</sub>)

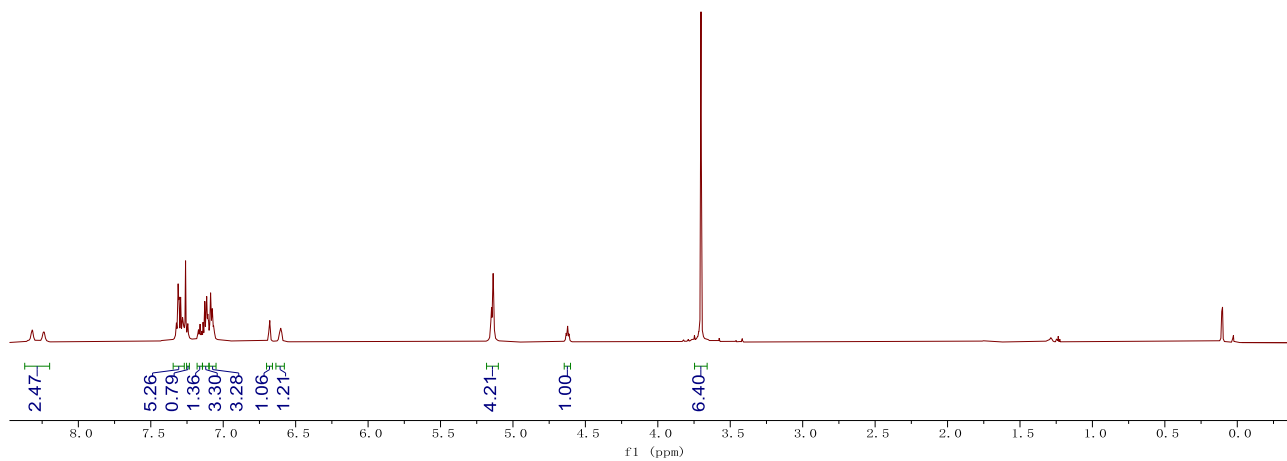

169.86  
150.66  
146.09  
135.88  
135.75  
132.69  
131.52  
130.84  
128.54  
126.50  
126.09  
124.29  
123.77  
121.88  
121.84  
118.87  
118.27  
117.87  
110.66  
109.75  
101.15  
100.73  
68.80  
54.11  
52.68  
47.41

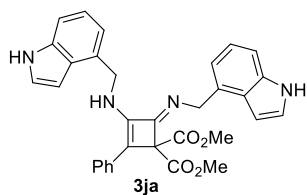

<sup>13</sup>C NMR (151 MHz, CDCl<sub>3</sub>)

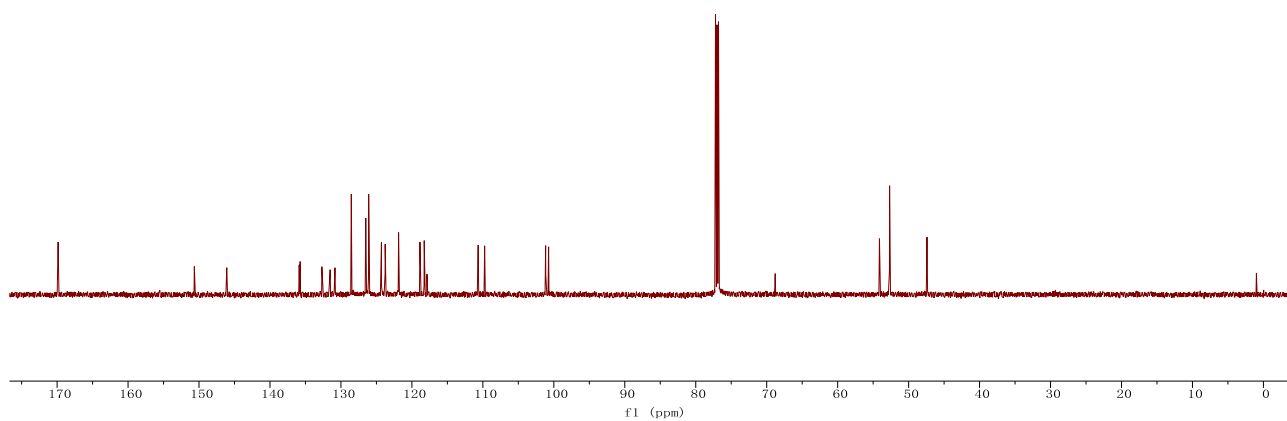

8.350  
8.271  
7.293  
7.286  
7.273  
7.265  
7.255  
7.235  
7.187  
7.167  
7.156  
7.153  
7.148  
7.132  
7.129  
7.124  
7.115  
7.052  
7.035  
6.955  
6.938  
6.691  
6.688  
6.677  
6.675  
6.666  
6.664  
6.658  
6.653  
6.651  
4.421  
4.405  
4.389  
4.003  
3.986  
3.970  
3.965  
3.954  
3.690  
3.320  
3.300  
3.281  
3.196  
3.180  
3.163

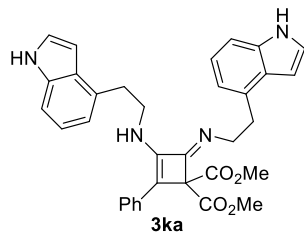

<sup>1</sup>H NMR (400 MHz, CDCl<sub>3</sub>)

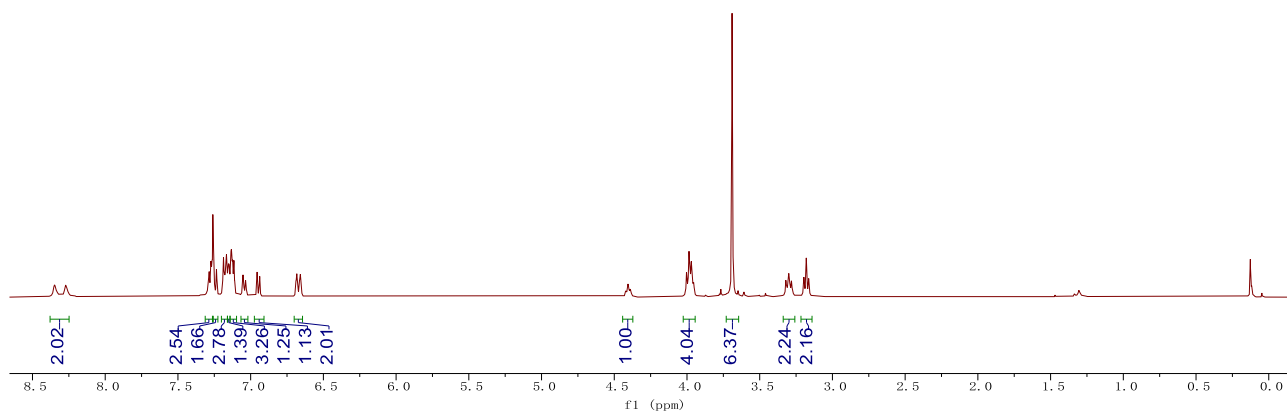

169.79  
149.87  
145.99  
135.79  
135.71  
132.61  
132.28  
130.84  
128.42  
127.51  
126.34  
125.90  
123.96  
123.68  
122.04  
121.96  
119.93  
118.12  
109.59  
109.14  
101.00  
100.80  
68.38  
53.31  
52.61  
45.26  
35.13  
34.82

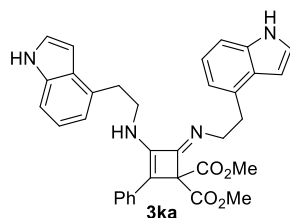

<sup>13</sup>C NMR (101 MHz, CDCl<sub>3</sub>)

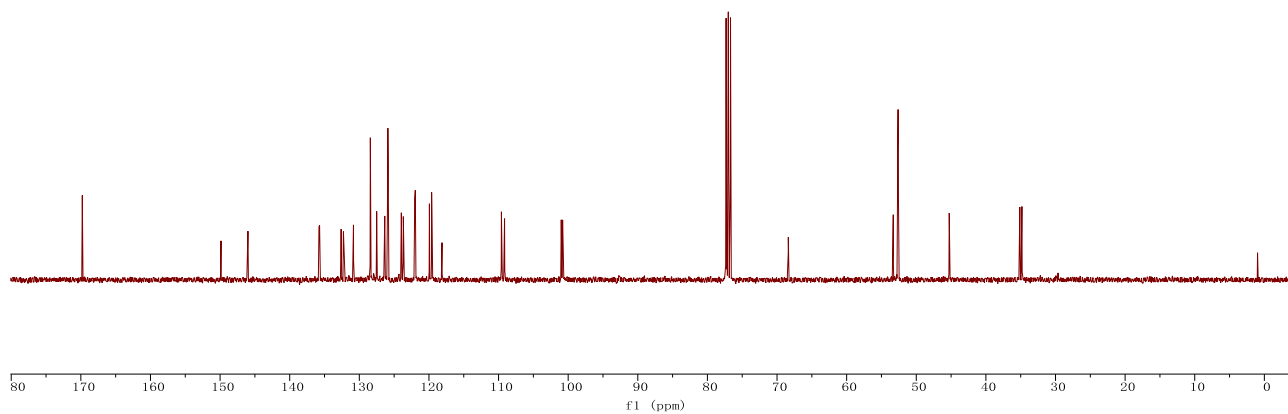

7.387  
7.385  
7.369  
7.367  
7.357  
7.343  
7.331  
7.322  
7.319  
7.308  
7.223  
7.221  
7.218  
7.211  
7.209  
7.206  
7.200  
7.197  
7.194  
7.194  
6.333  
6.330  
6.328  
6.325  
6.298  
6.295  
6.289  
6.289  
6.200  
6.194  
6.187  
6.182  
4.777  
4.767  
4.751  
4.602  
4.591  
4.581  
3.746

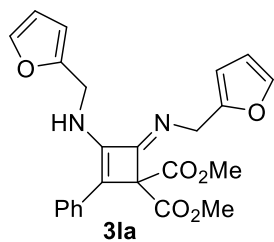

$^1\text{H NMR}$  (600 MHz,  $\text{CDCl}_3$ )

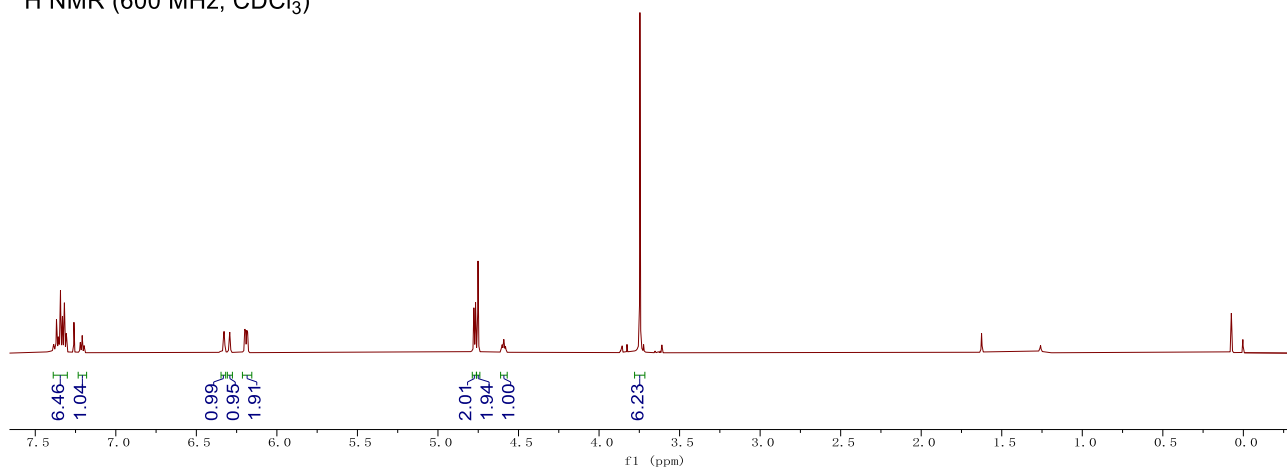

169.31  
152.91  
152.54  
151.57  
145.13  
142.10  
141.69  
132.24  
128.59  
127.06  
126.39  
119.92  
110.35  
110.25  
107.33  
106.54  
68.75  
52.77  
49.23  
41.61

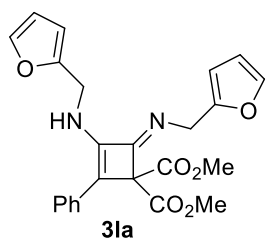

$^{13}\text{C NMR}$  (151 MHz,  $\text{CDCl}_3$ )

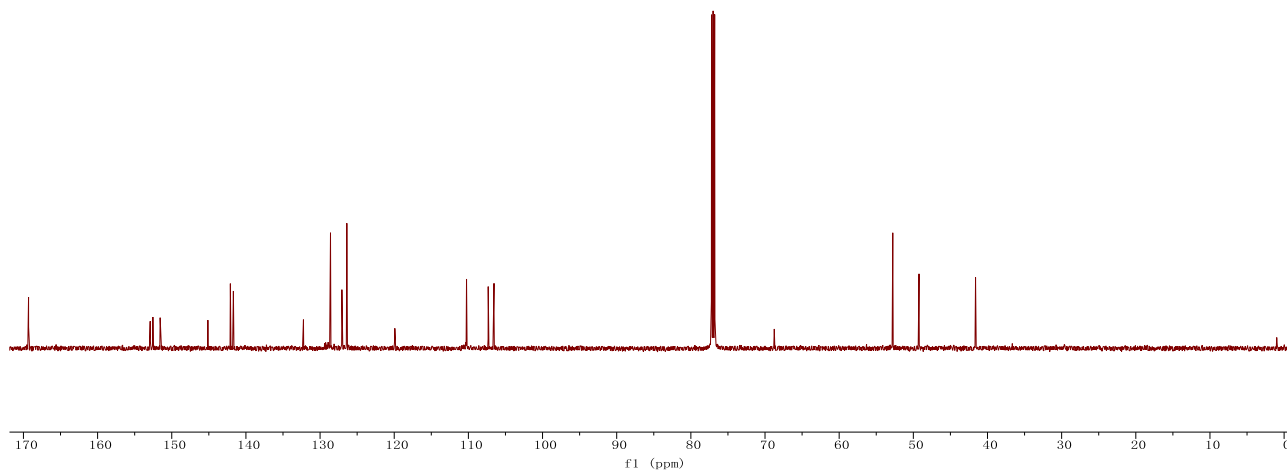



7.358  
7.348  
7.245  
7.234  
7.224  
7.212  
7.202  
5.990  
5.975  
5.964  
5.961  
5.949  
5.947  
5.935  
5.932  
5.921  
5.918  
5.906  
5.904  
5.892  
5.889  
5.878  
5.864  
5.872  
5.868  
5.864  
5.860  
5.856  
5.852  
5.849  
5.829  
5.825  
5.821  
5.817  
5.813  
5.809  
5.806  
5.807  
5.267  
5.264  
5.261  
5.241  
5.238  
5.235  
5.232  
4.842  
4.828  
4.815  
4.680  
4.677  
4.673  
4.661  
4.650  
4.647  
4.643  
4.500  
4.486  
4.424  
3.735

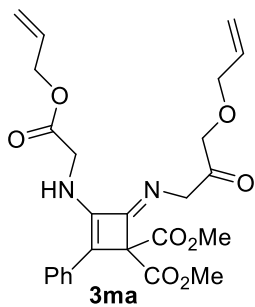

<sup>1</sup>H NMR (400 MHz, CDCl<sub>3</sub>)

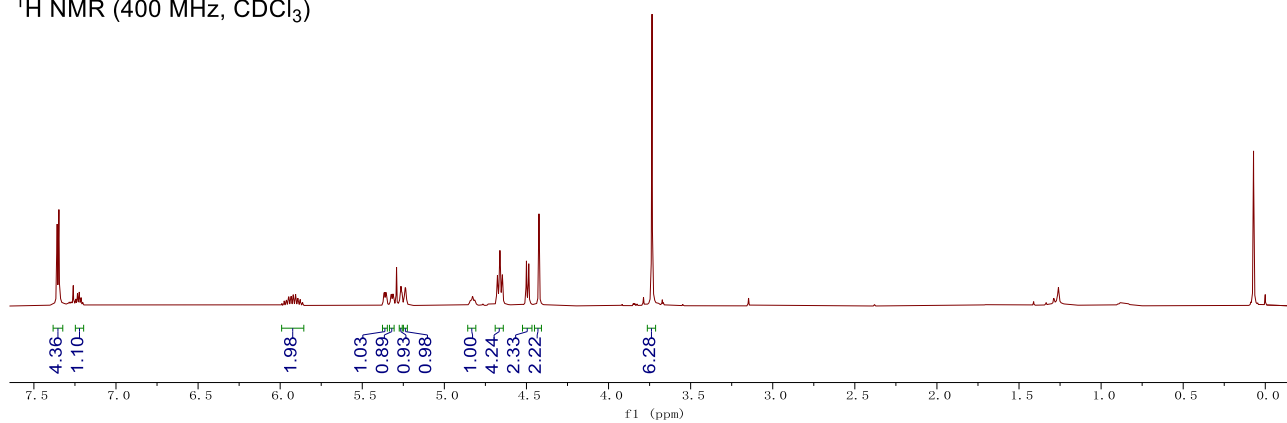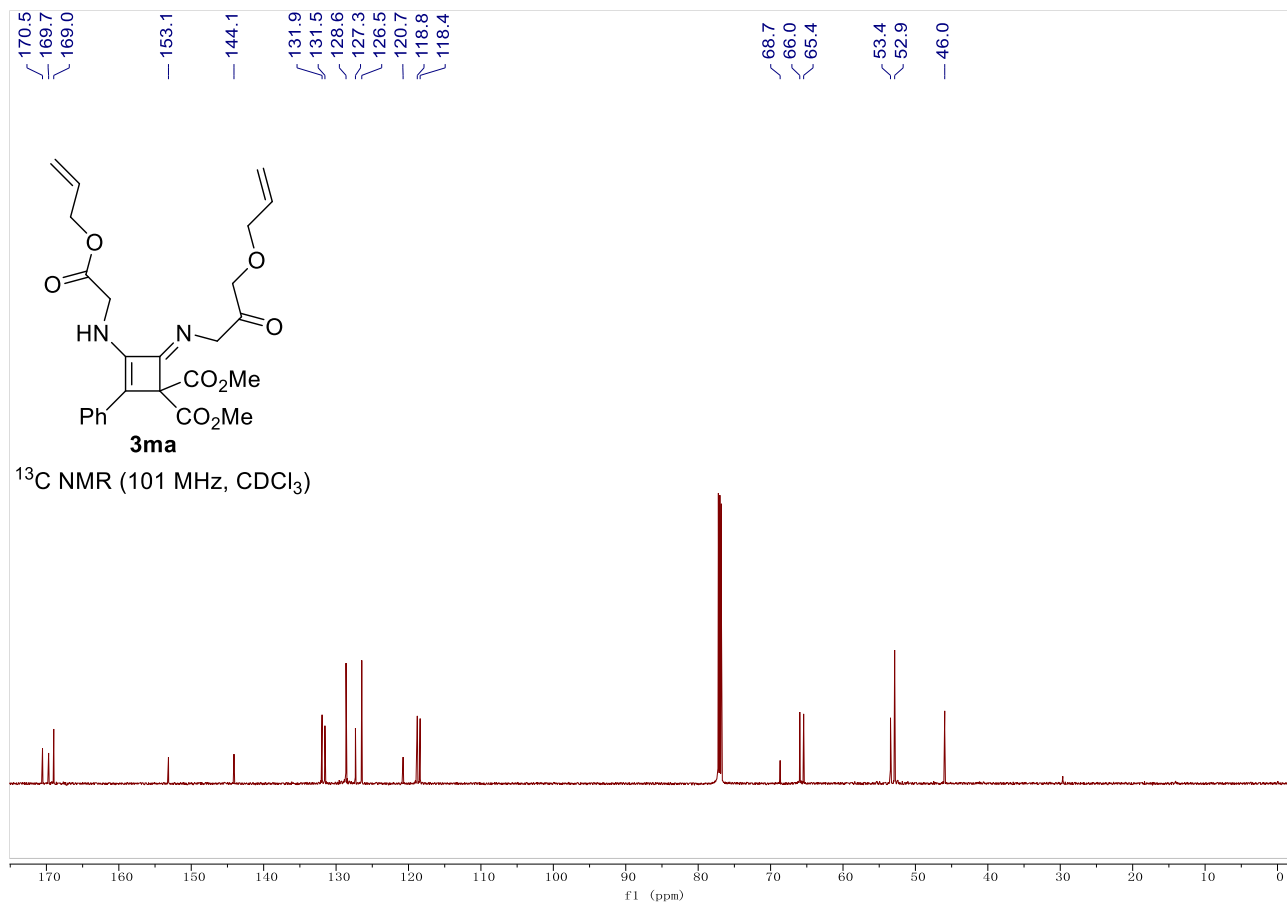

<sup>13</sup>C NMR (101 MHz, CDCl<sub>3</sub>)

7.886  
7.872  
7.408  
7.397  
7.379  
7.366  
7.354  
7.344  
7.332  
7.319  
7.307  
7.295  
7.282  
7.188  
7.177  
7.164  
7.154  
7.142  
7.136  
7.124  
7.111  
6.941  
6.929  
4.809  
4.799  
4.785  
4.774  
4.751  
4.742  
4.726  
4.717  
4.093  
4.069  
4.030  
4.019  
4.008  
3.841  
3.817

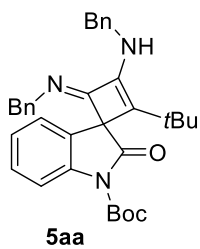

$^1\text{H NMR}$  (600 MHz,  $\text{CDCl}_3$ )

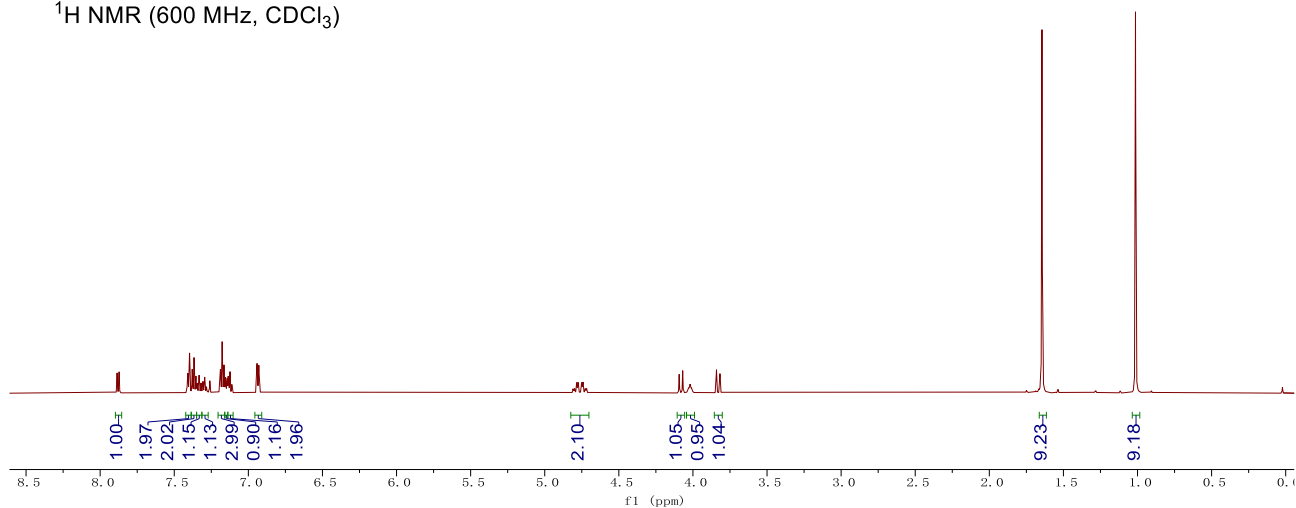

175.19  
154.45  
149.52  
146.14  
140.53  
138.97  
138.34  
132.89  
128.70  
128.52  
128.24  
127.99  
127.69  
127.56  
127.13  
126.50  
124.36  
123.53  
115.18

84.16  
65.59  
55.60  
48.99  
34.43  
29.18  
28.07

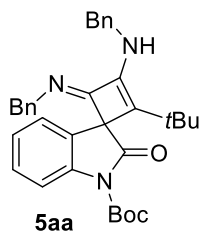

$^{13}\text{C NMR}$  (151 MHz,  $\text{CDCl}_3$ )

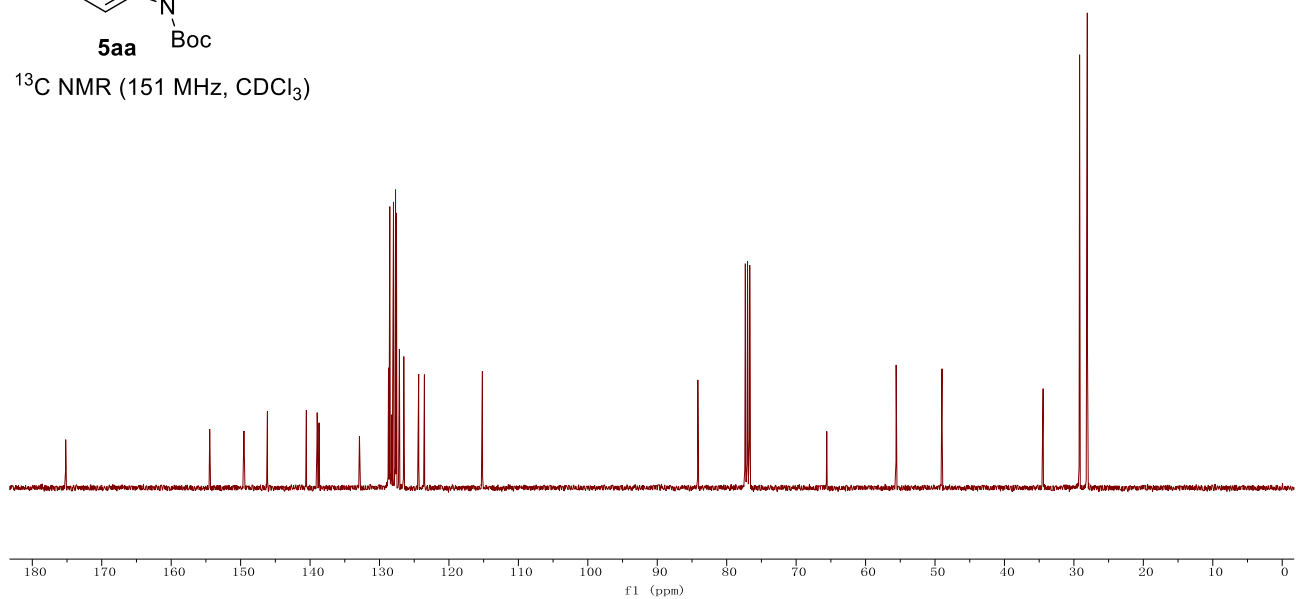

8.273  
8.253  
7.414  
7.409  
7.393  
7.388  
7.369  
7.363  
7.354  
7.349  
7.344  
7.341  
7.328  
7.323  
7.319  
7.315  
7.309  
7.305  
7.297  
7.285  
7.281  
7.276  
7.209  
7.204  
7.191  
7.184  
7.169  
7.166  
7.155  
7.150  
7.144  
7.134  
7.131  
7.118  
7.114  
6.902  
6.897  
6.882  
6.882  
4.829  
4.814  
4.793  
4.778  
4.764  
4.742  
4.727  
4.070  
4.054  
4.036  
3.992  
3.956  
3.893  
3.857  
2.606  
0.991

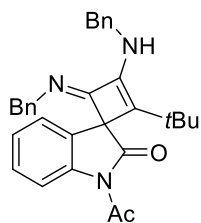

**5ab**

$^1\text{H NMR}$  (400 MHz,  $\text{CDCl}_3$ )

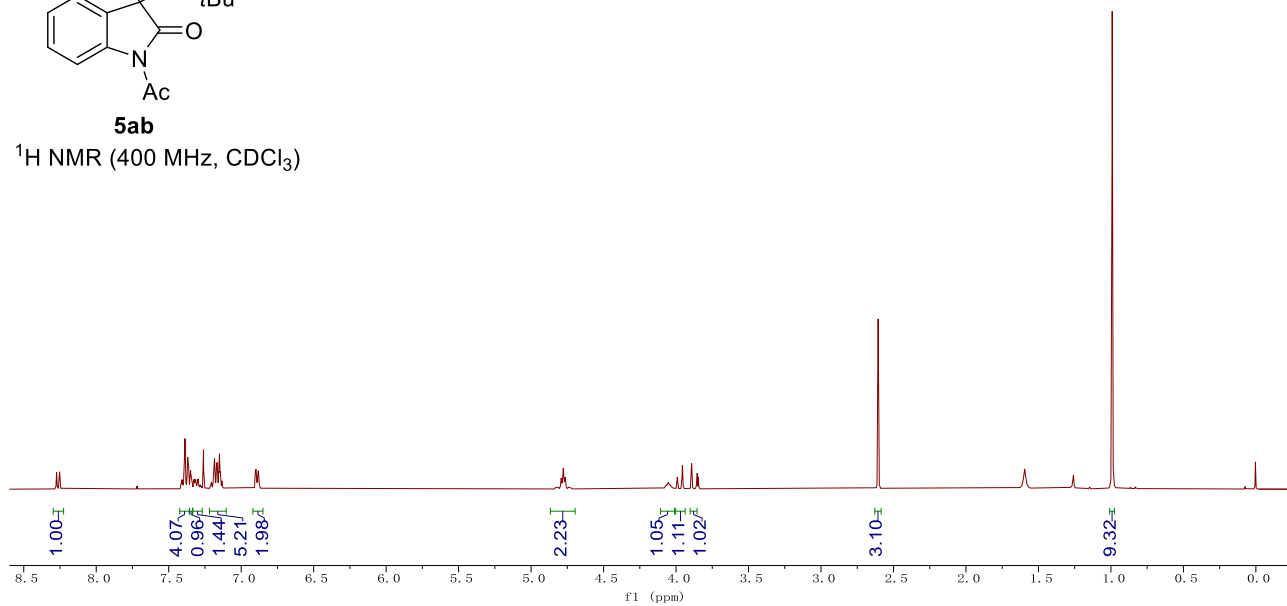

177.95  
171.18  
154.47  
146.32  
140.50  
138.95  
138.78  
132.82  
128.99  
128.63  
128.51  
128.11  
127.55  
127.40  
127.27  
126.65  
125.28  
123.39  
116.91  
65.74  
55.33  
49.02  
34.61  
29.24  
26.63

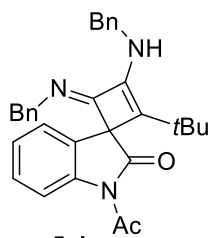

**5ab**

$^{13}\text{C NMR}$  (101 MHz,  $\text{CDCl}_3$ )

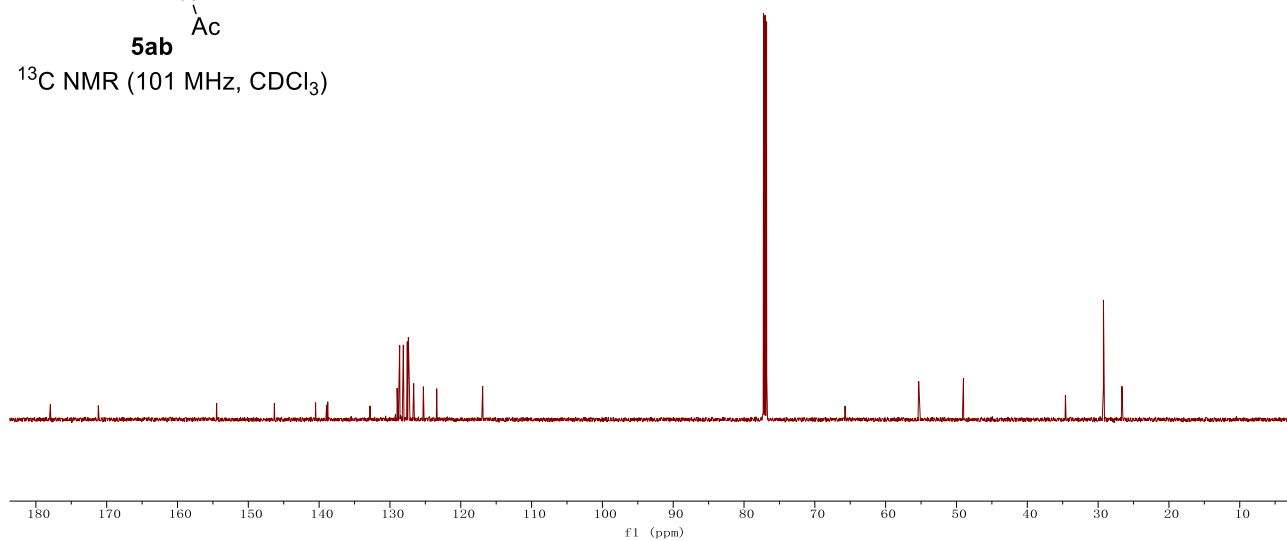

7.978  
7.965  
7.406  
7.394  
7.378  
7.366  
7.354  
7.340  
7.337  
7.305  
7.293  
7.281  
7.179  
7.177  
7.174  
7.167  
7.164  
7.159  
7.153  
7.151  
7.147  
7.142  
7.140  
7.139  
7.131  
7.128  
7.126  
7.119  
6.891  
6.888  
6.878  
6.875  
4.805  
4.794  
4.781  
4.770  
4.760  
4.749  
4.735  
4.724  
4.110  
4.086  
4.062  
4.052  
4.041  
4.029  
3.798  
3.774  
1.002

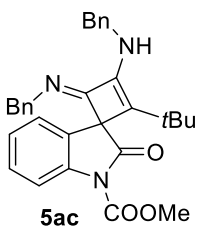

<sup>1</sup>H NMR (600 MHz, CDCl<sub>3</sub>)

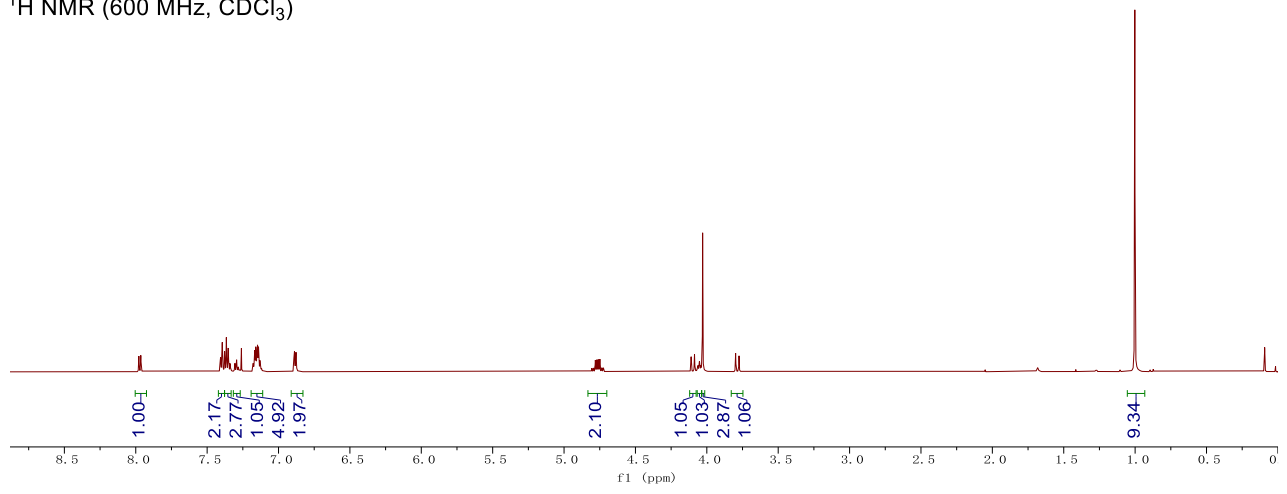

175.10  
154.09  
151.77  
146.32  
140.58  
138.87  
138.25  
132.95  
128.90  
128.55  
128.32  
128.00  
127.59  
127.51  
127.16  
126.52  
124.81  
123.56  
115.35  
65.59  
55.53  
53.87  
48.96  
34.45  
29.18

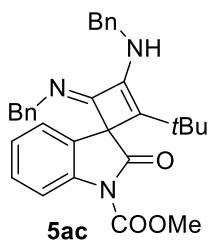

<sup>13</sup>C NMR (151 MHz, CDCl<sub>3</sub>)

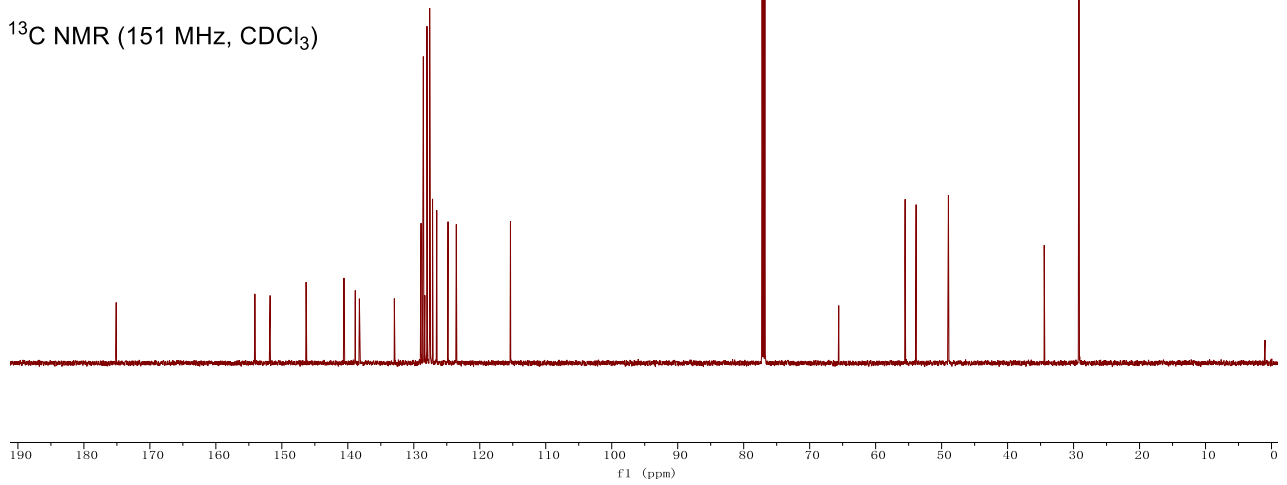

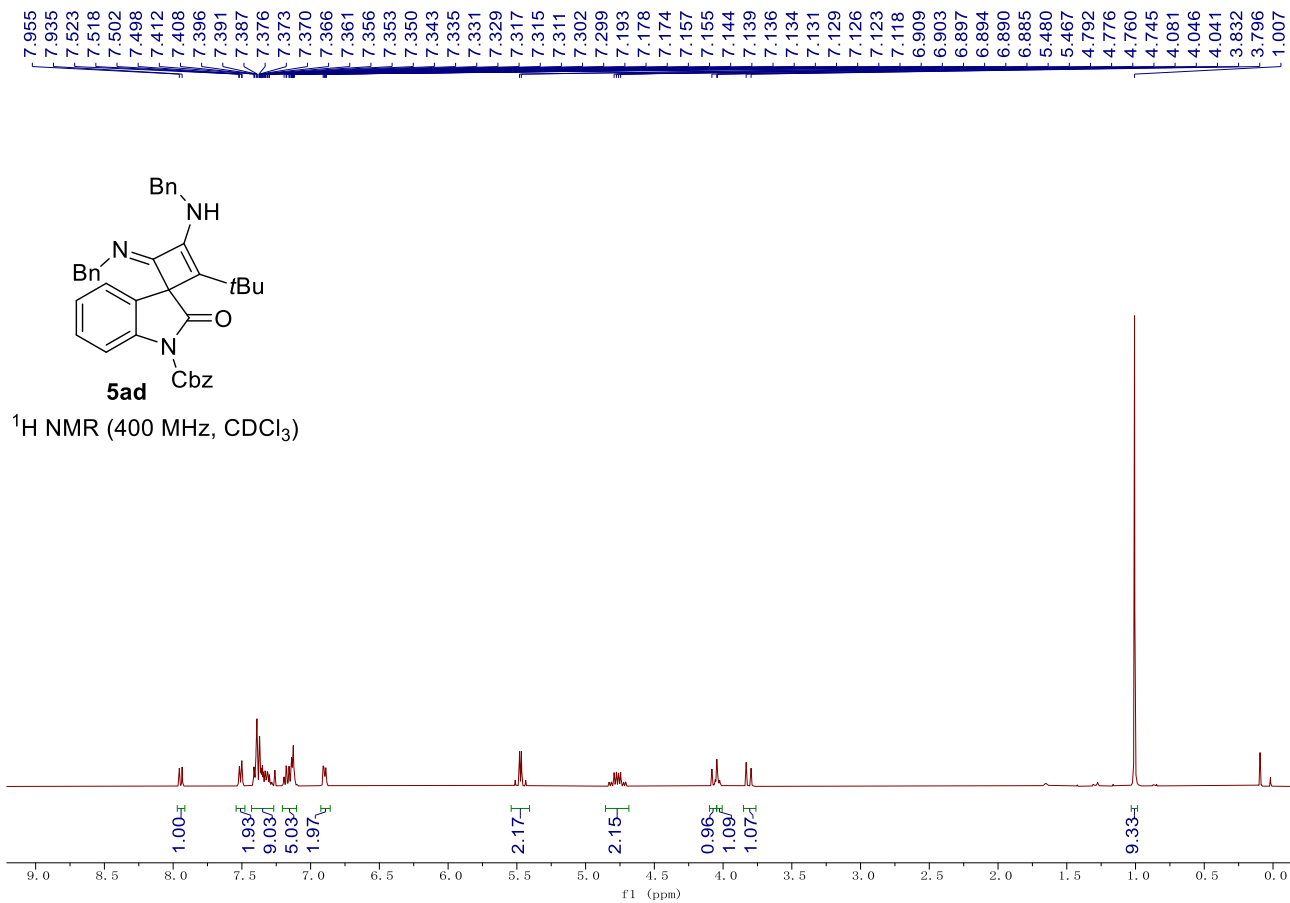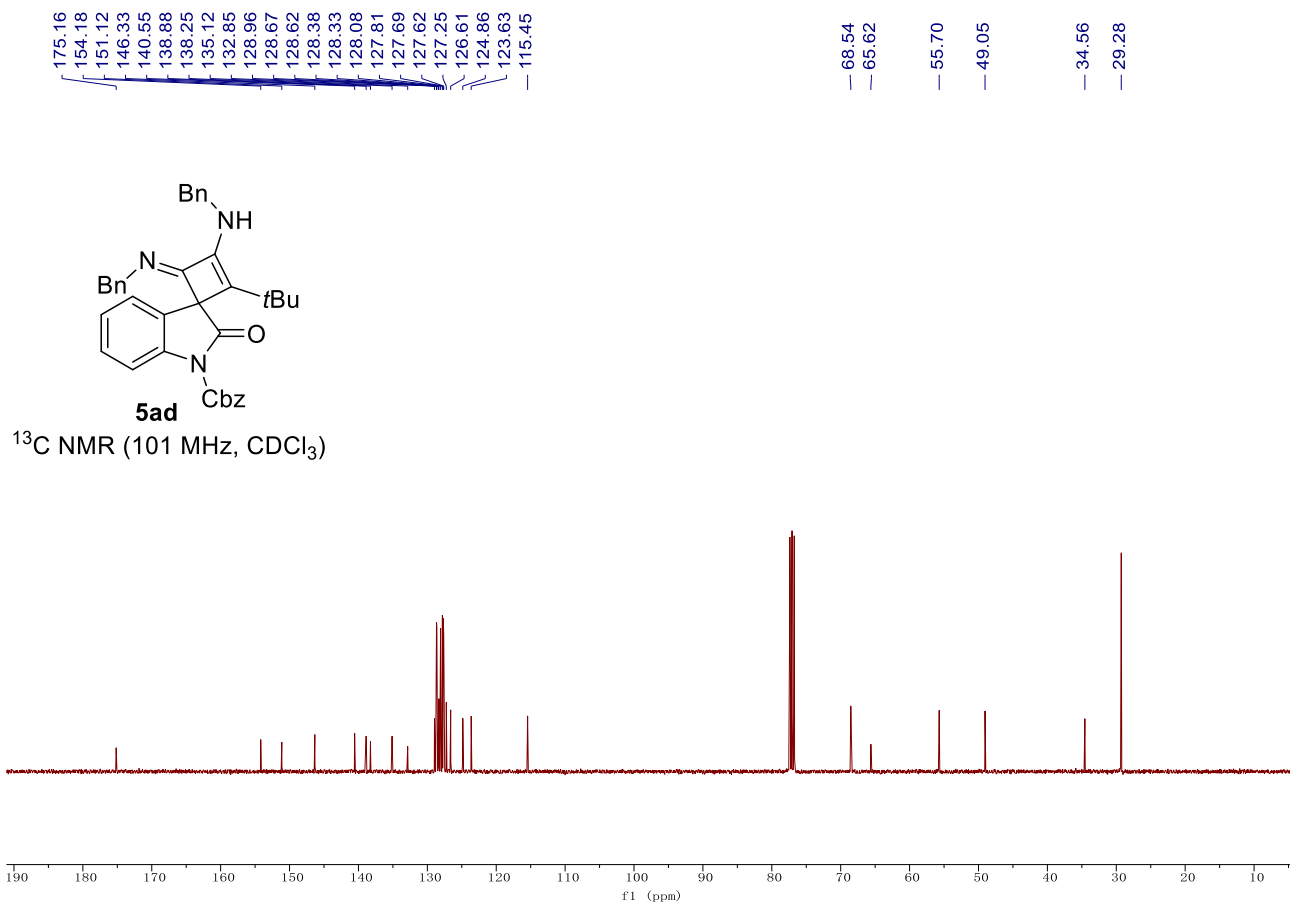

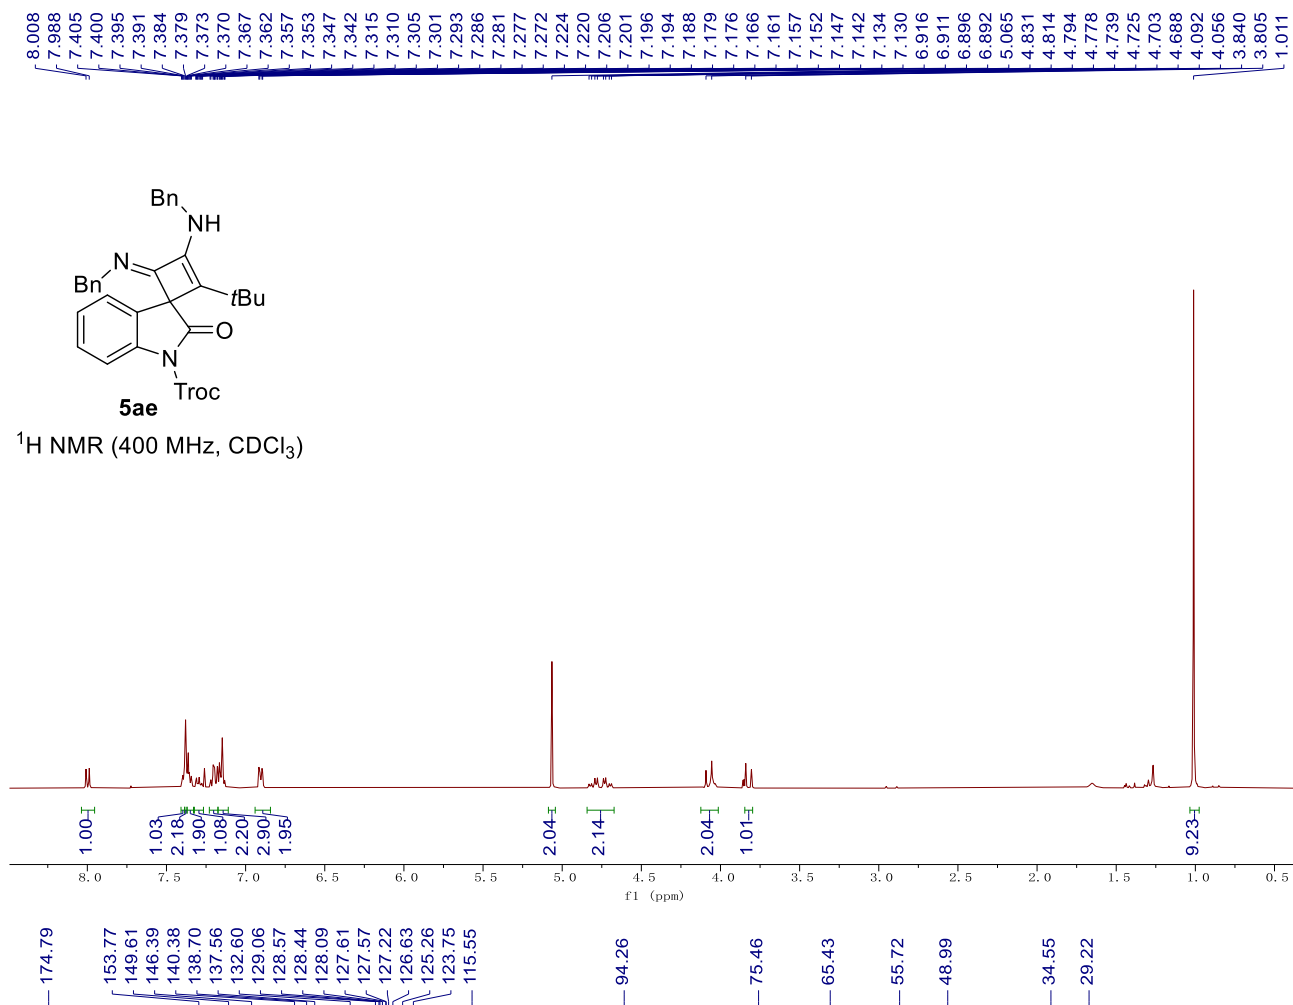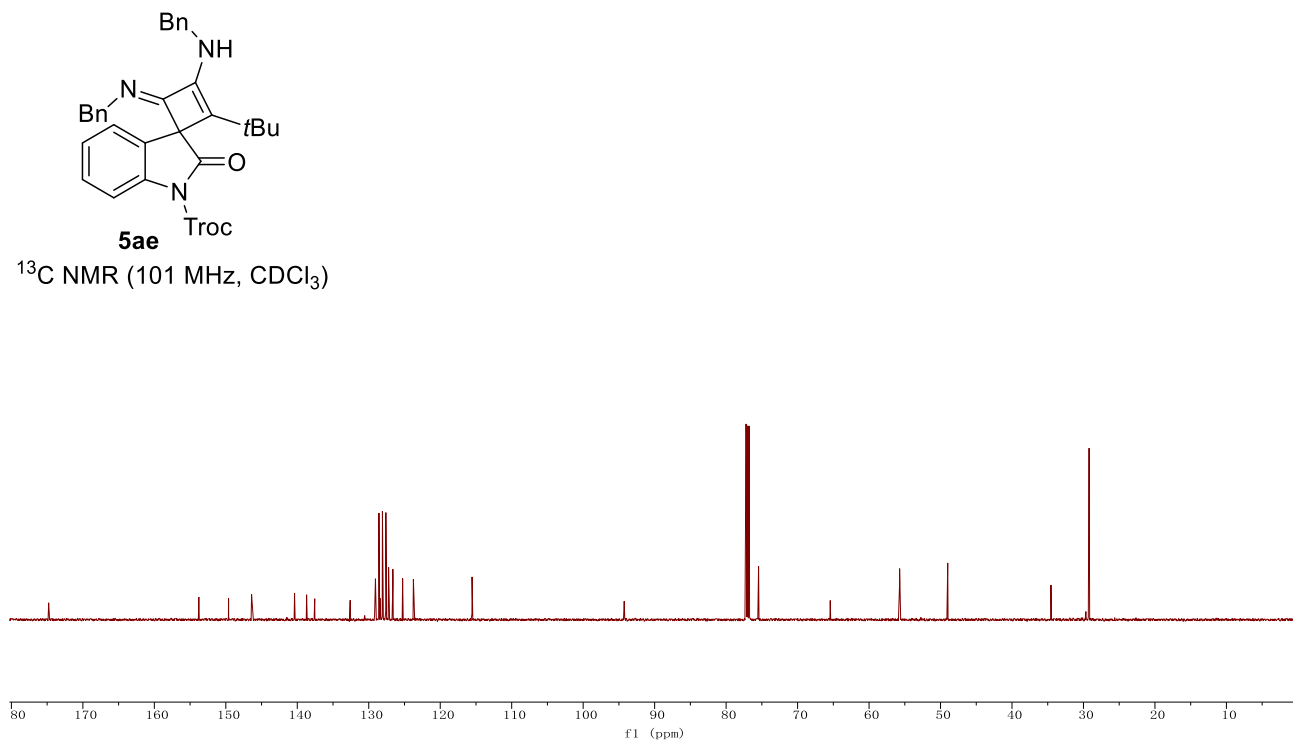

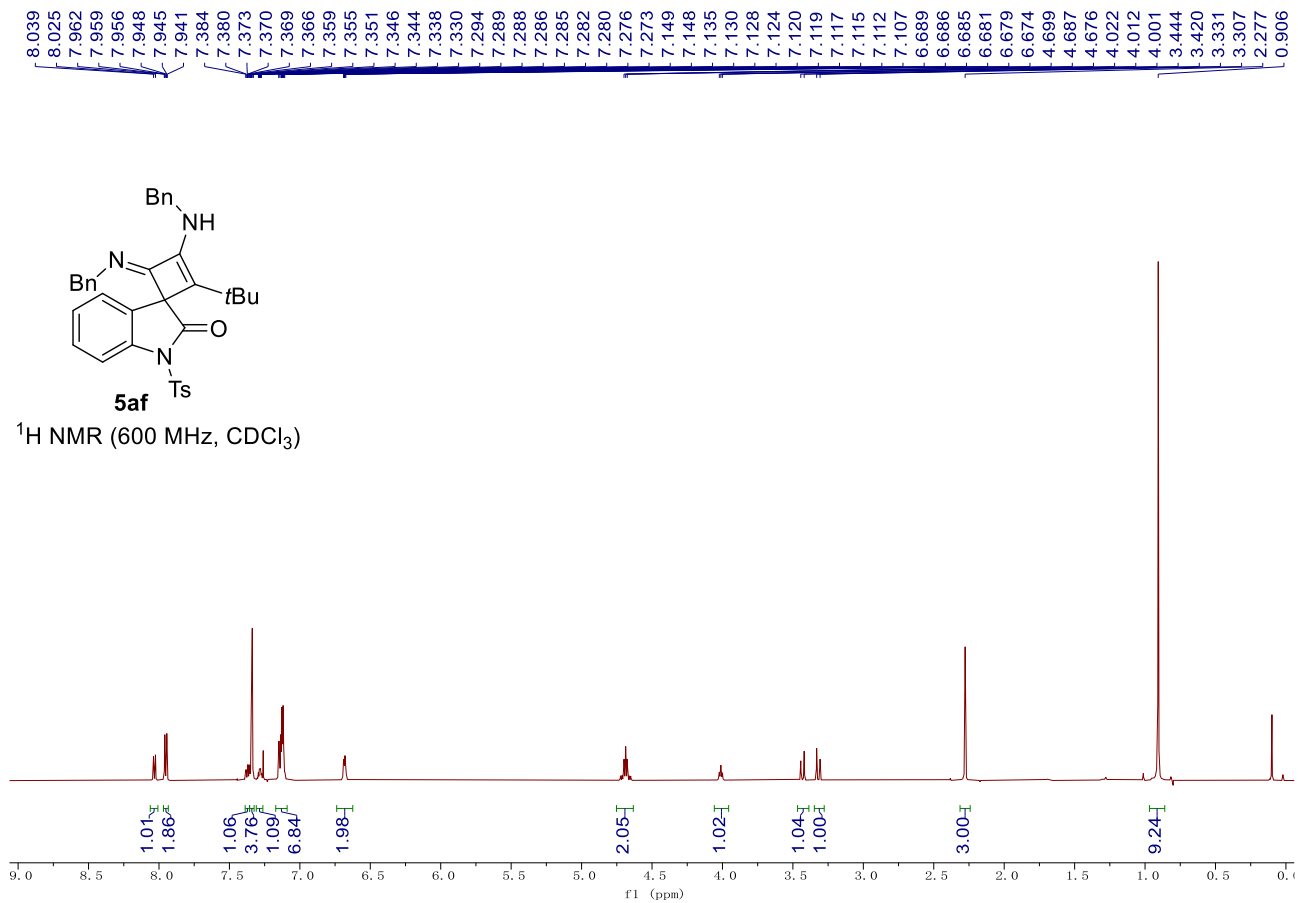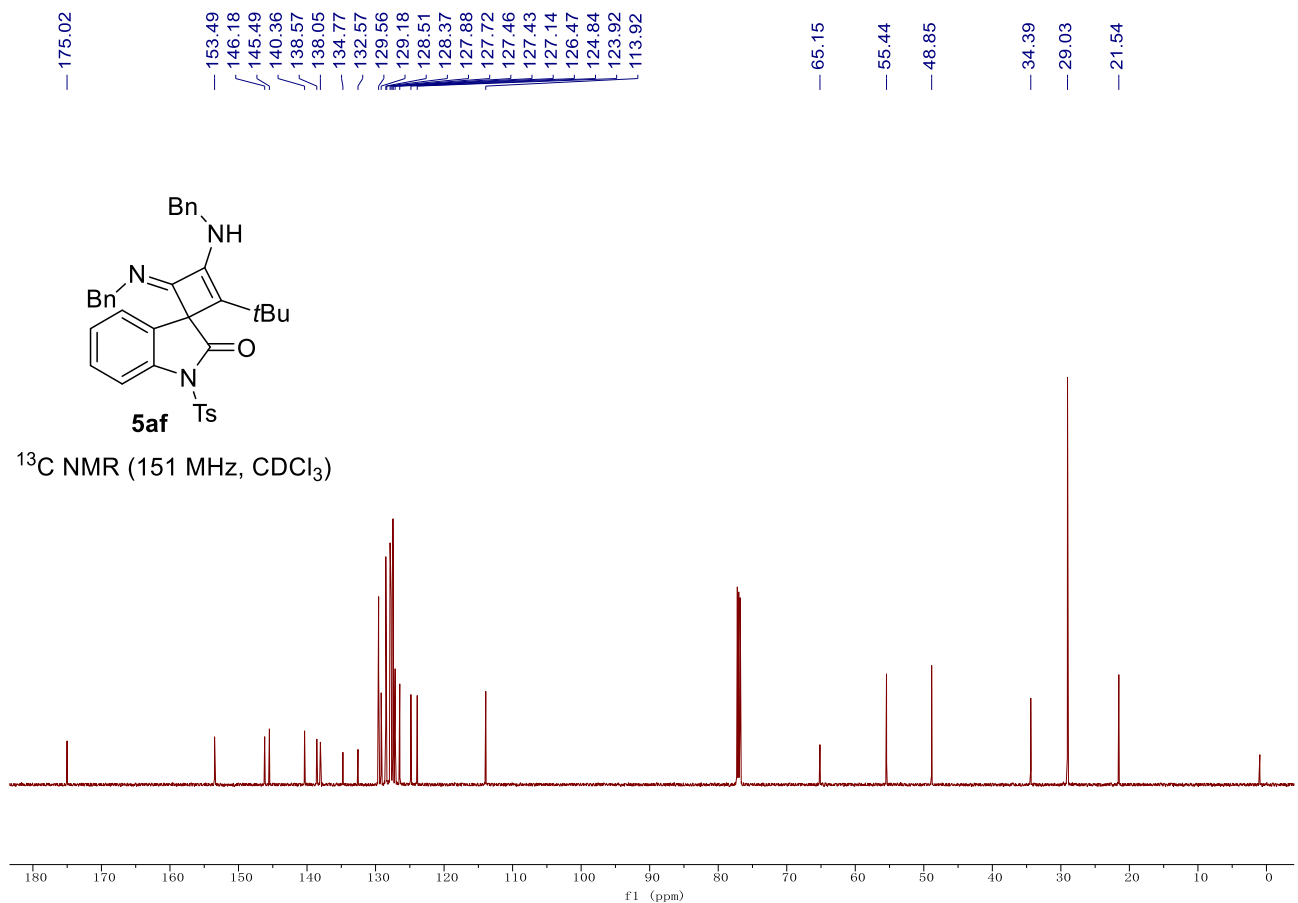

7.859  
7.851  
7.844  
7.837  
7.386  
7.382  
7.372  
7.369  
7.359  
7.358  
7.355  
7.345  
7.307  
7.304  
7.300  
7.297  
7.293  
7.288  
7.282  
7.198  
7.195  
7.193  
7.184  
7.181  
7.172  
7.163  
7.161  
7.158  
7.153  
7.149  
7.024  
7.019  
7.009  
7.004  
6.994  
6.989  
6.937  
6.926  
6.857  
6.852  
6.844  
6.840  
4.792  
4.781  
4.768  
4.756  
4.725  
4.715  
4.700  
4.690  
4.085  
4.061  
4.035  
4.024  
4.013  
3.832  
3.809  
1.620  
1.004

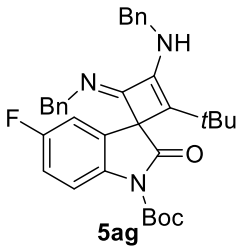

$^1\text{H NMR}$  (600 MHz,  $\text{CDCl}_3$ )

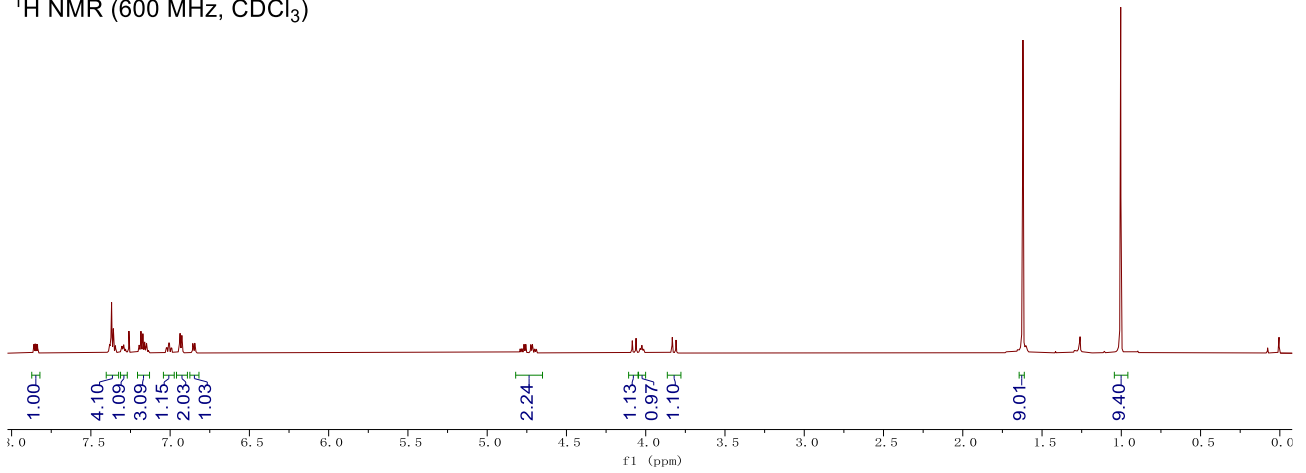

174.77  
161.31  
158.89  
153.65  
149.50  
146.41  
140.38  
138.74  
134.62  
132.46  
130.49  
130.41  
128.60  
128.10  
127.58  
127.27  
126.67  
116.64  
116.56  
115.42  
115.19  
110.90  
110.66  
84.41  
65.75  
55.71  
49.01  
34.49  
29.22  
28.08

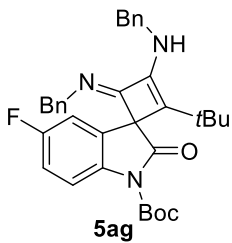

$^{13}\text{C NMR}$  (101 MHz,  $\text{CDCl}_3$ )

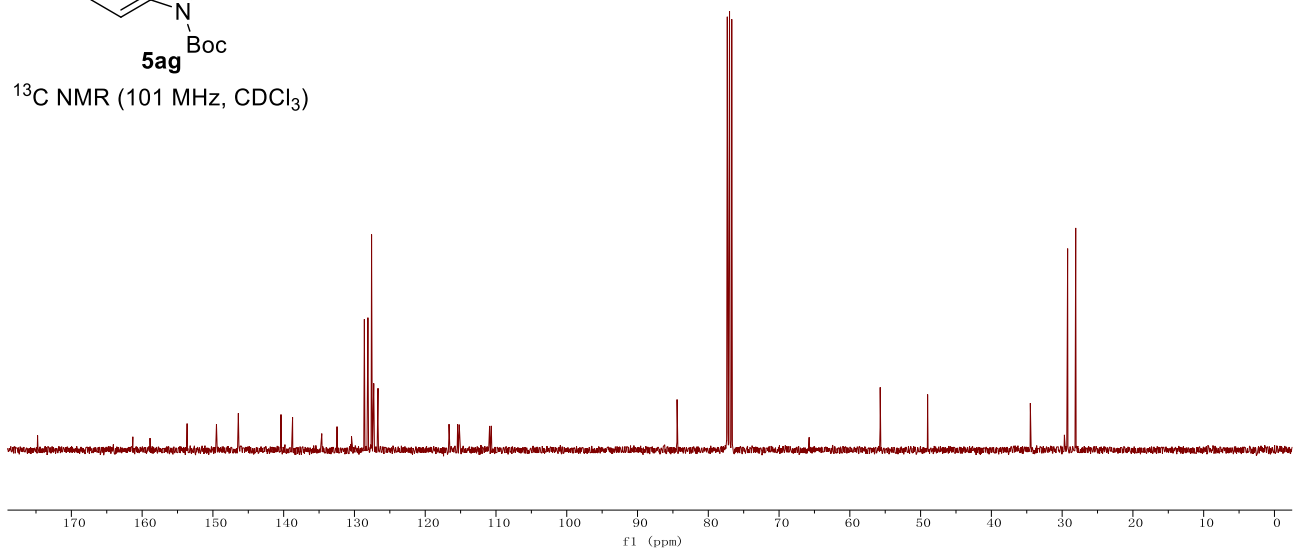



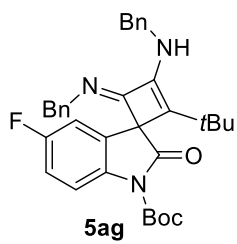

<sup>19</sup>F NMR (565 MHz, CDCl<sub>3</sub>)

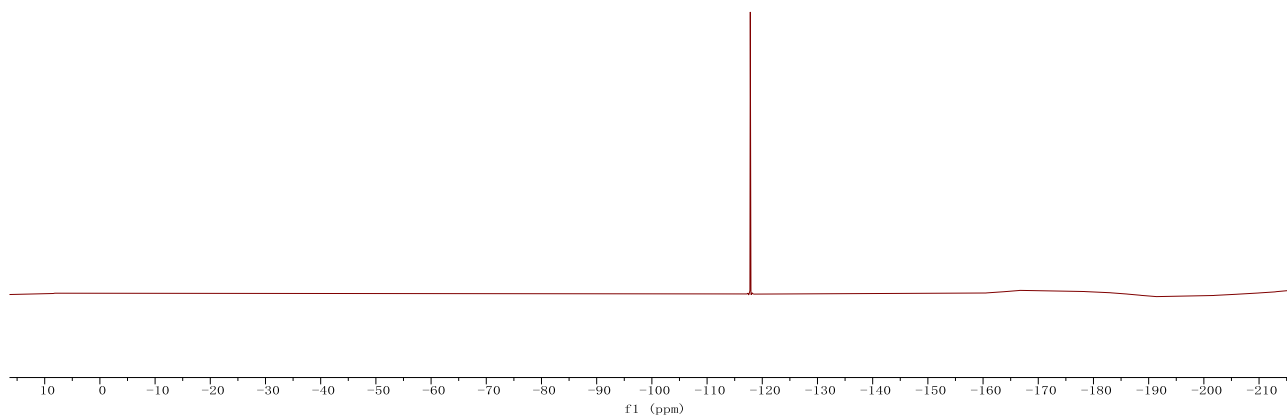

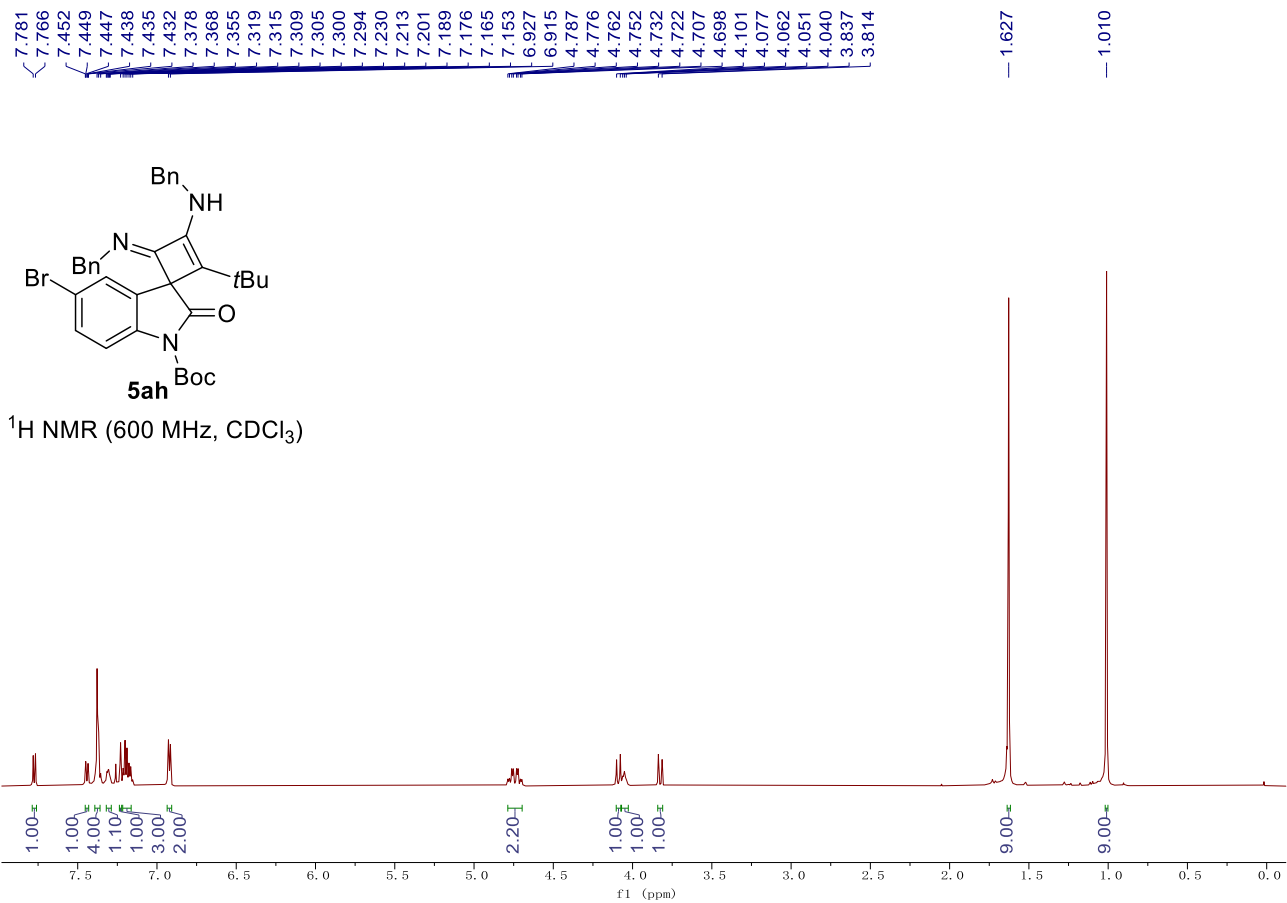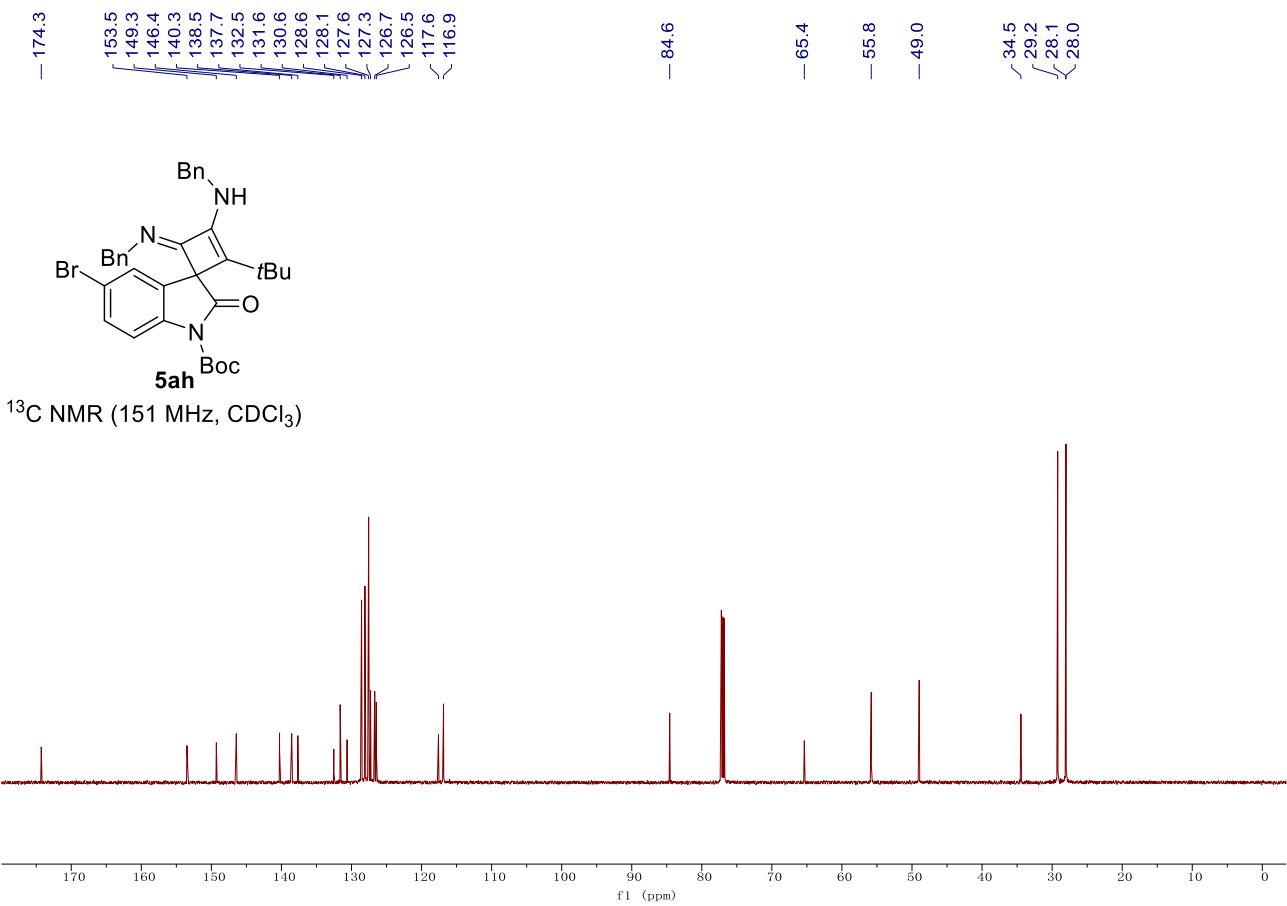

7.729  
7.715  
7.402  
7.399  
7.388  
7.386  
7.367  
7.355  
7.342  
7.303  
7.301  
7.298  
7.282  
7.279  
7.277  
7.176  
7.173  
7.170  
7.162  
7.158  
7.152  
7.149  
7.145  
7.142  
7.140  
7.136  
7.131  
7.114  
7.113  
7.111  
7.109  
7.100  
7.099  
7.097  
7.096  
6.913  
6.908  
6.904  
6.896  
6.894  
6.891  
4.787  
4.776  
4.763  
4.752  
4.736  
4.726  
4.712  
4.702  
4.107  
4.083  
3.999  
3.988  
3.977  
3.803  
3.780  
2.278  
1.627  
1.000

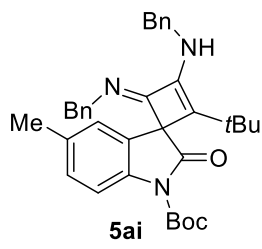

<sup>1</sup>H NMR (600 MHz, CDCl<sub>3</sub>)

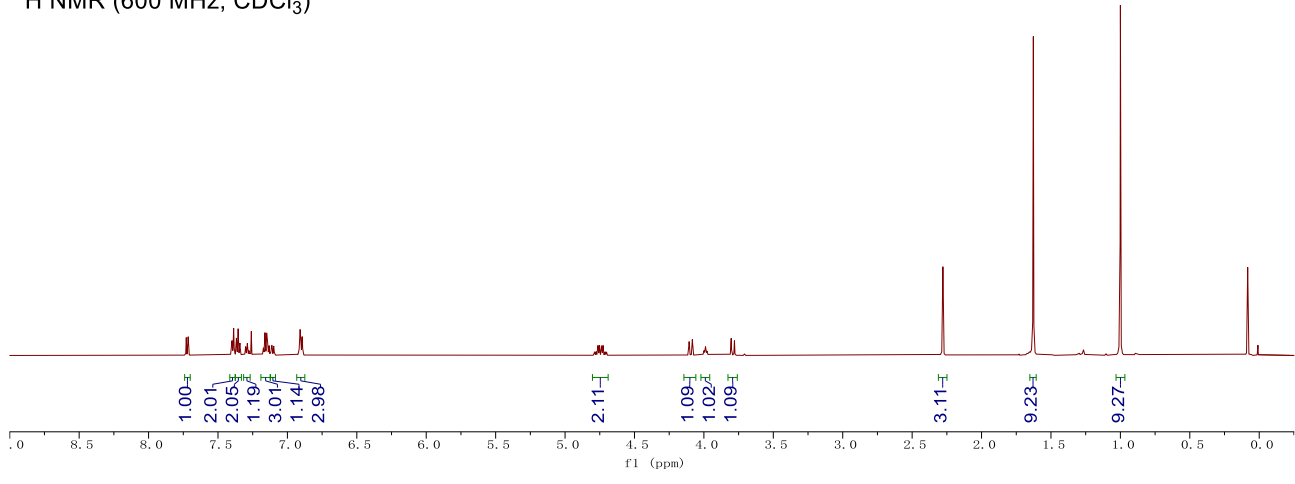

175.40  
154.69  
149.58  
146.09  
140.54  
138.98  
136.34  
134.04  
133.27  
129.19  
128.52  
128.16  
127.94  
127.71  
127.65  
127.16  
126.49  
124.11  
114.99  
84.01  
65.59  
55.67  
49.03  
34.45  
29.20  
28.10  
20.96

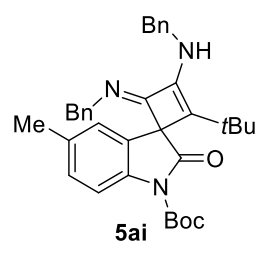

<sup>13</sup>C NMR (151 MHz, CDCl<sub>3</sub>)

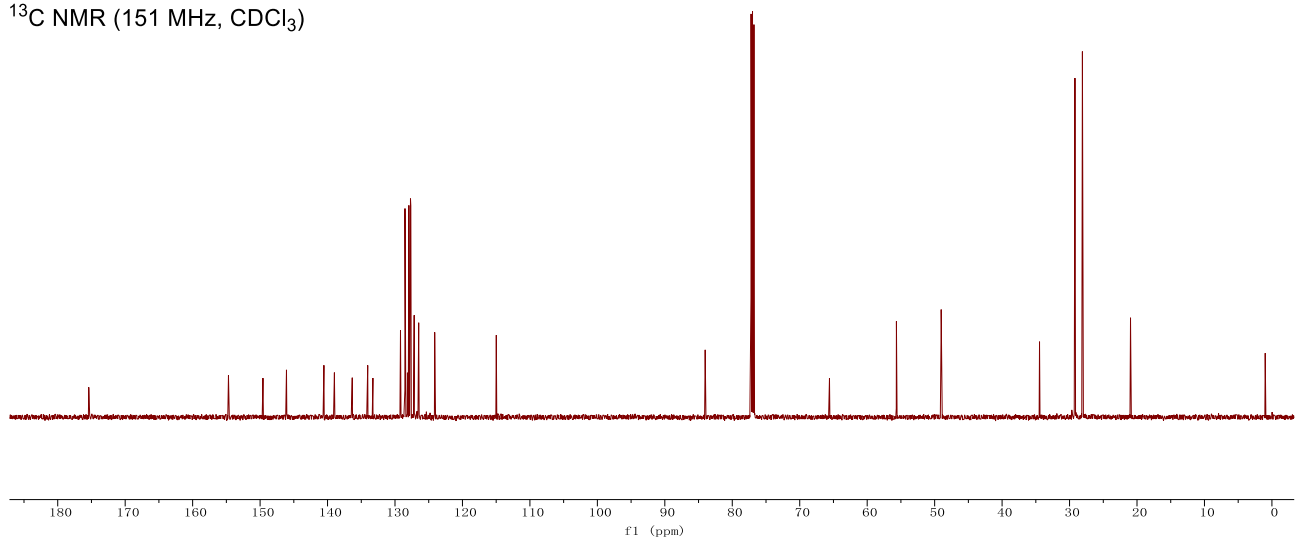

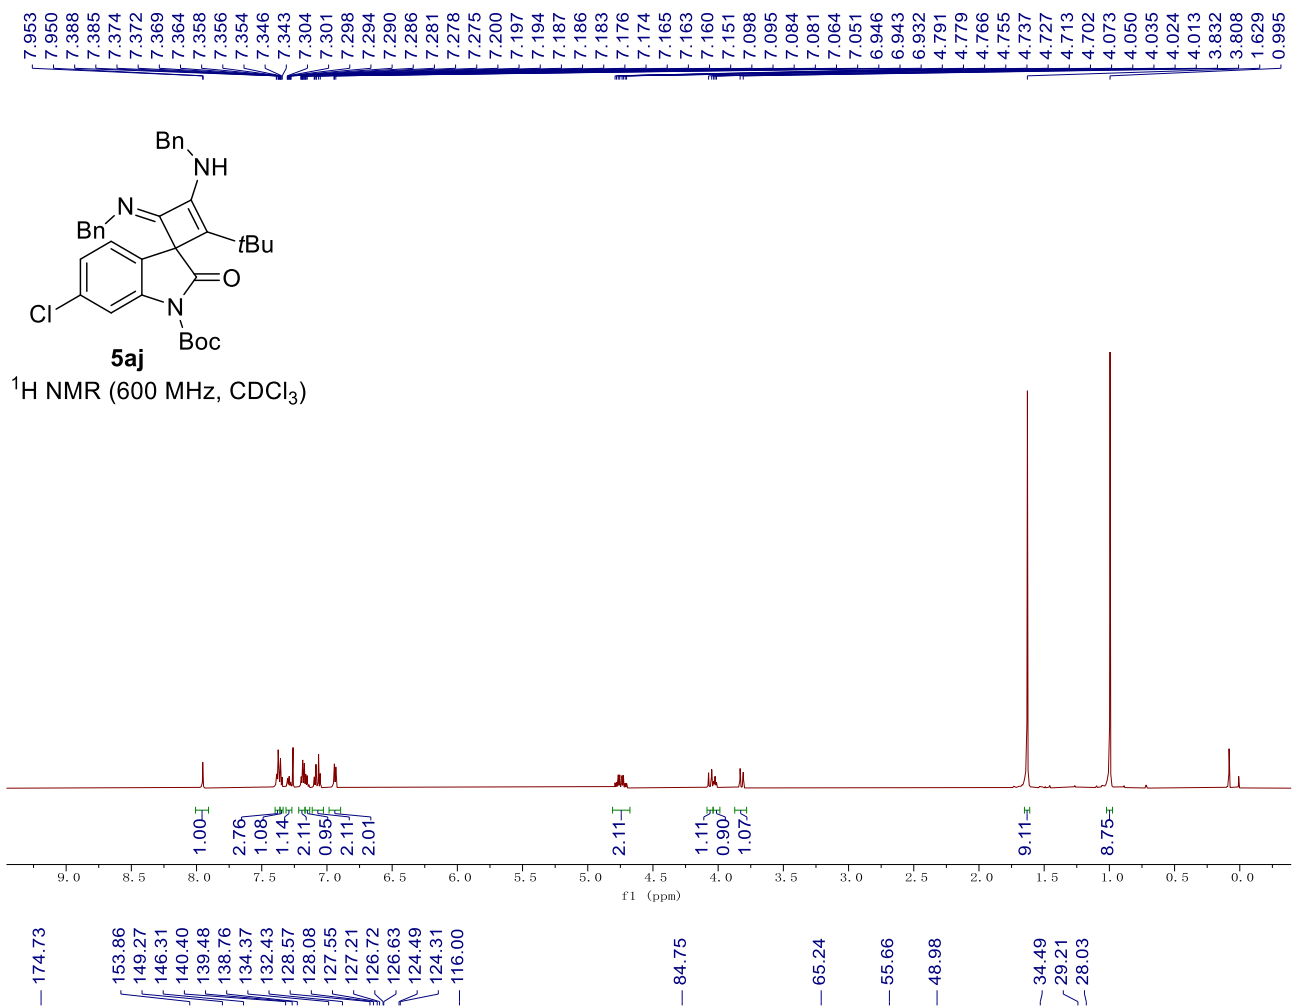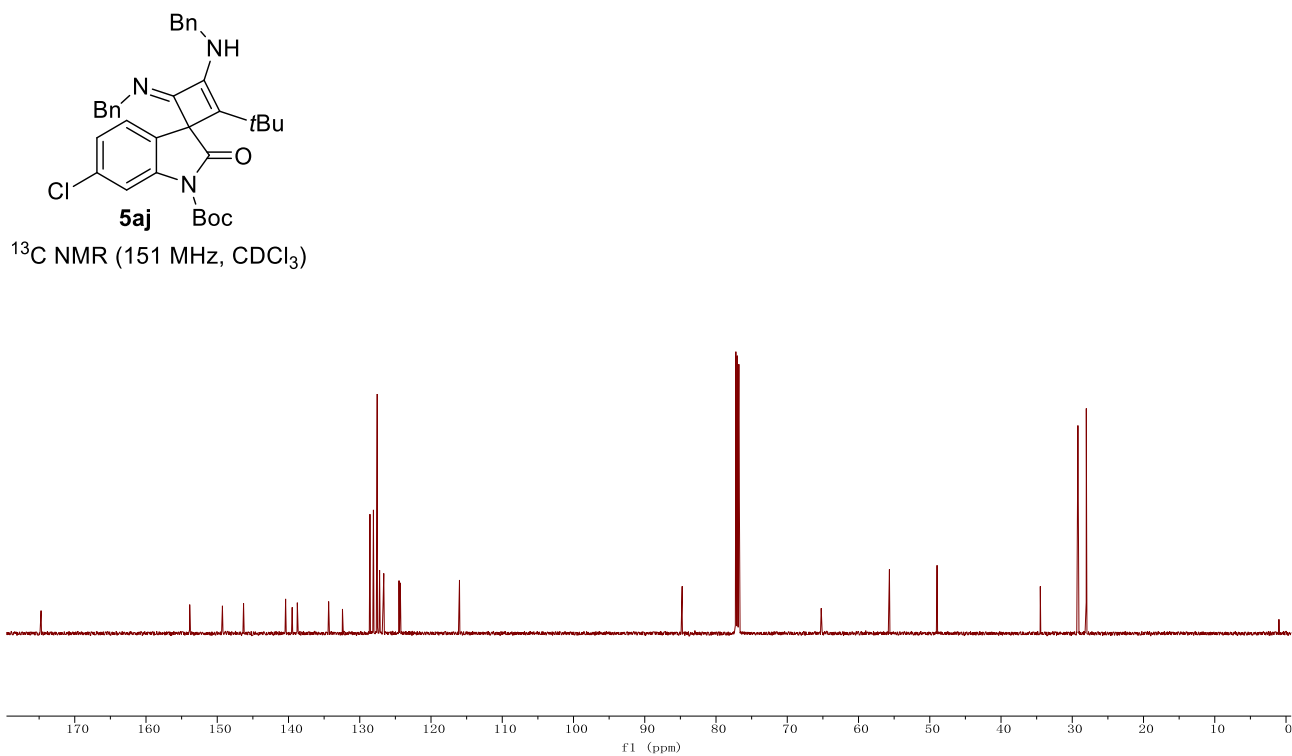

8.106  
8.103  
7.384  
7.381  
7.370  
7.365  
7.354  
7.353  
7.350  
7.343  
7.340  
7.302  
7.299  
7.296  
7.291  
7.287  
7.283  
7.279  
7.276  
7.273  
7.248  
7.245  
7.235  
7.232  
7.199  
7.196  
7.193  
7.189  
7.185  
7.182  
7.175  
7.173  
7.168  
7.164  
7.162  
7.159  
7.150  
7.005  
6.992  
6.938  
6.927  
4.786  
4.774  
4.761  
4.750  
4.732  
4.722  
4.708  
4.697  
4.067  
4.044  
4.031  
4.020  
4.009  
3.827  
3.804  
1.624  
0.991

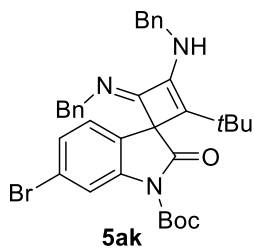

$^1\text{H NMR}$  (600 MHz,  $\text{CDCl}_3$ )

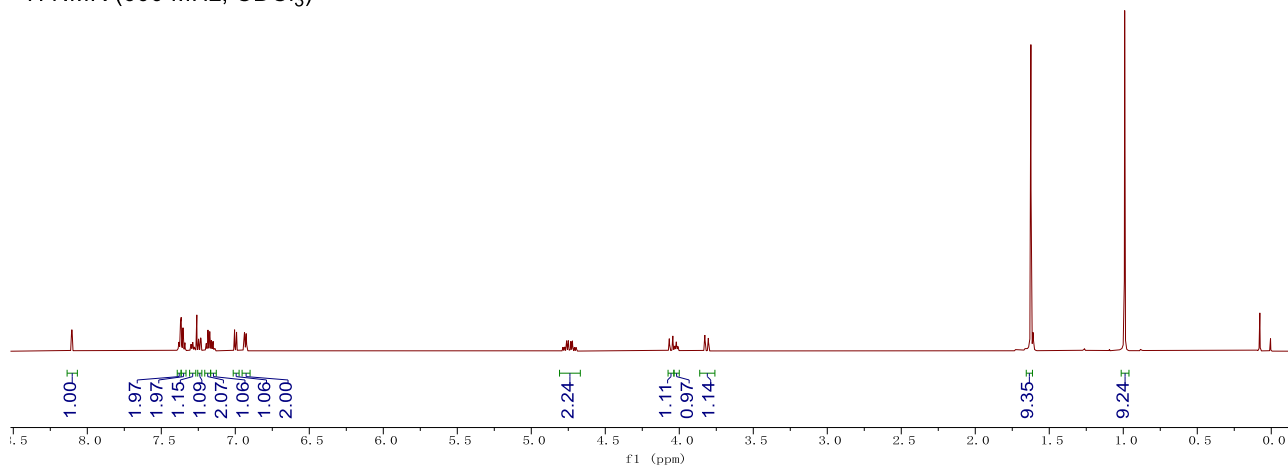

174.61  
153.73  
149.27  
146.34  
140.39  
139.64  
138.75  
132.35  
128.58  
128.09  
127.56  
127.42  
127.28  
127.23  
126.64  
124.66  
122.23  
118.74  
84.77  
65.30  
55.69  
48.98  
34.50  
29.21  
28.03

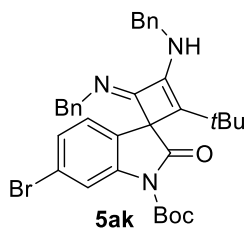

$^{13}\text{C NMR}$  (151 MHz,  $\text{CDCl}_3$ )

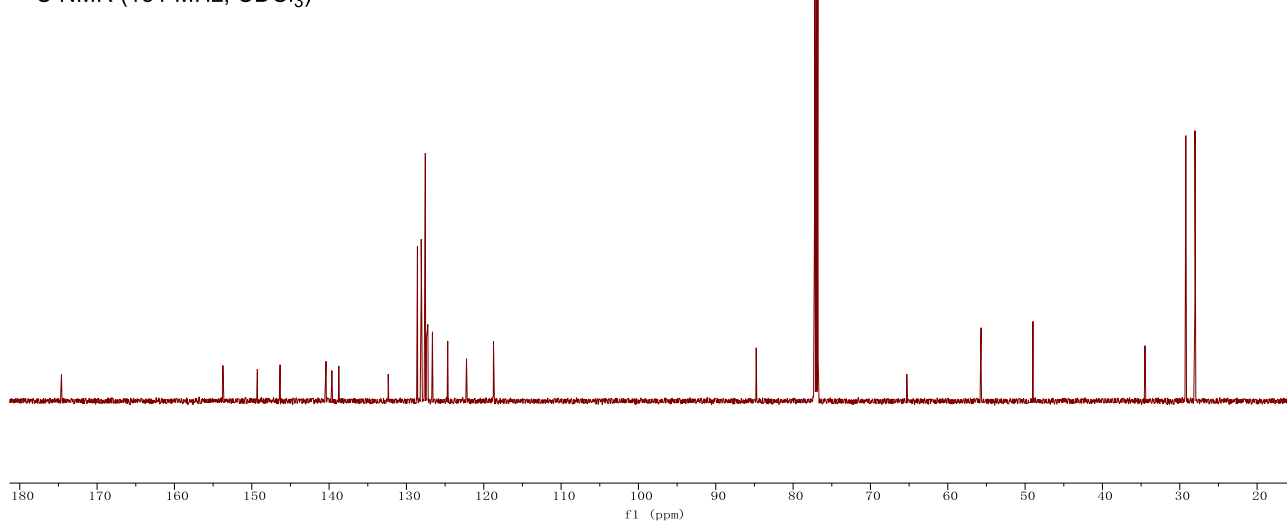

7.480  
7.477  
7.460  
7.457  
7.406  
7.401  
7.385  
7.381  
7.366  
7.363  
7.359  
7.348  
7.344  
7.315  
7.310  
7.304  
7.300  
7.295  
7.293  
7.286  
7.281  
7.276  
7.271  
7.271  
7.198  
7.193  
7.188  
7.182  
7.176  
7.171  
7.162  
7.158  
7.150  
7.146  
7.140  
7.133  
7.100  
7.097  
7.081  
7.078  
6.987  
6.983  
6.979  
6.971  
6.966  
6.960  
6.941  
6.805  
4.783  
4.766  
4.751  
4.728  
4.125  
4.089  
4.074  
4.057  
4.041  
3.892  
3.856  
1.590  
1.016

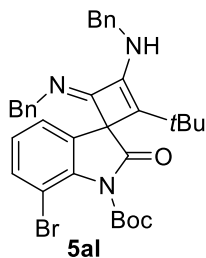

$^1\text{H NMR}$  (600 MHz,  $\text{CDCl}_3$ )

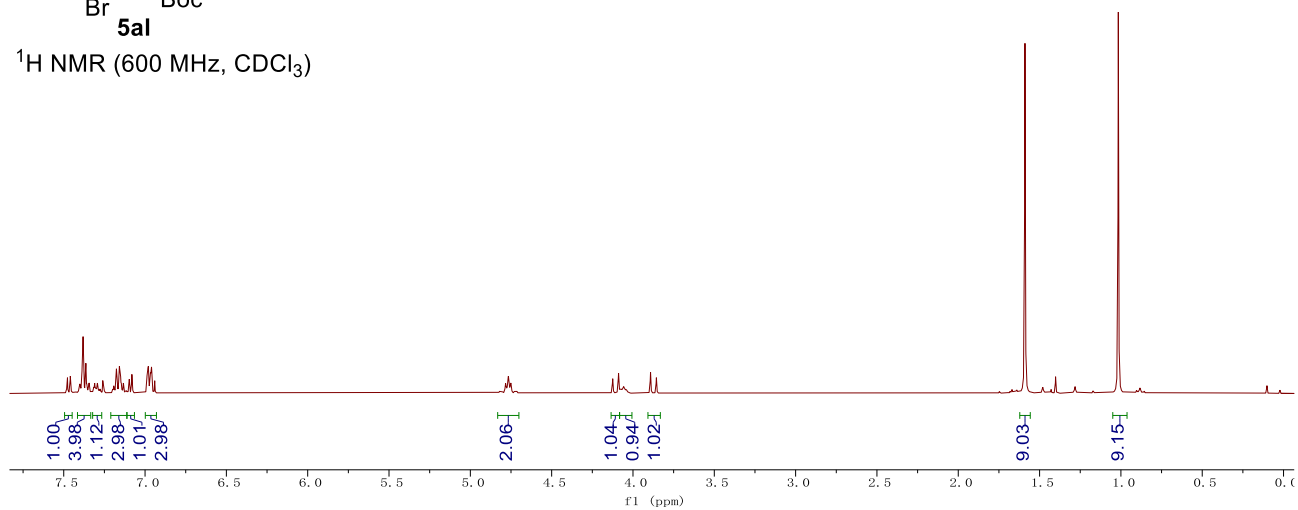

175.584  
153.603  
148.306  
146.095  
140.392  
138.782  
137.725  
133.193  
132.219  
131.908  
128.531  
127.972  
127.505  
127.477  
127.163  
126.474  
125.293  
122.486  
106.947  
85.191  
66.059  
55.806  
48.905  
34.435  
29.148  
27.592

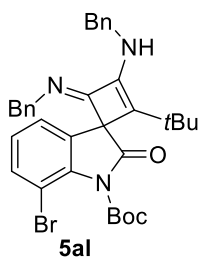

$^{13}\text{C NMR}$  (151 MHz,  $\text{CDCl}_3$ )

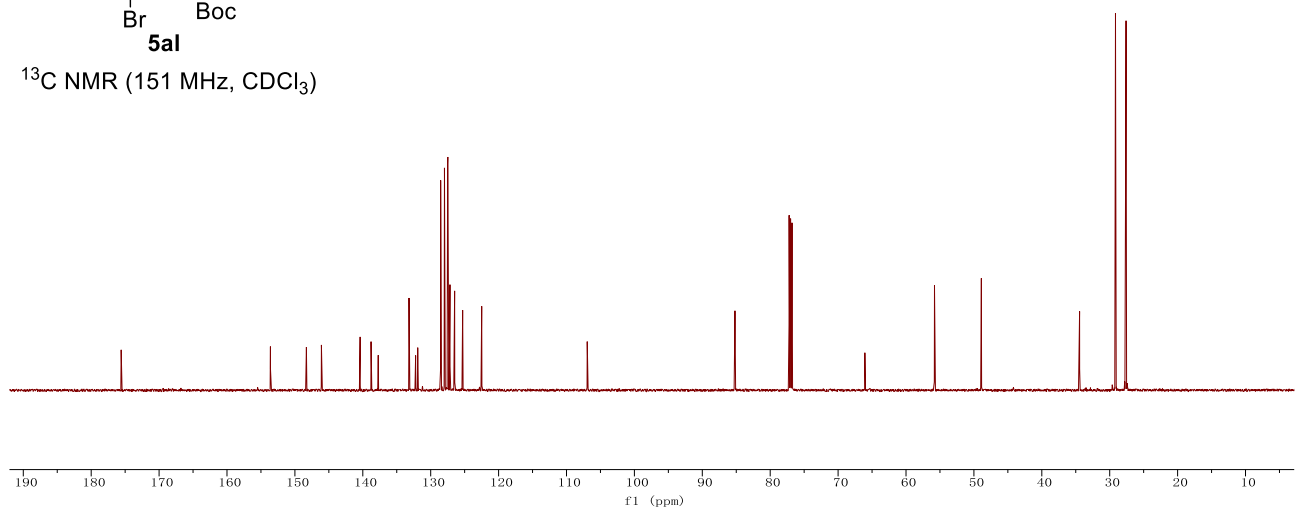

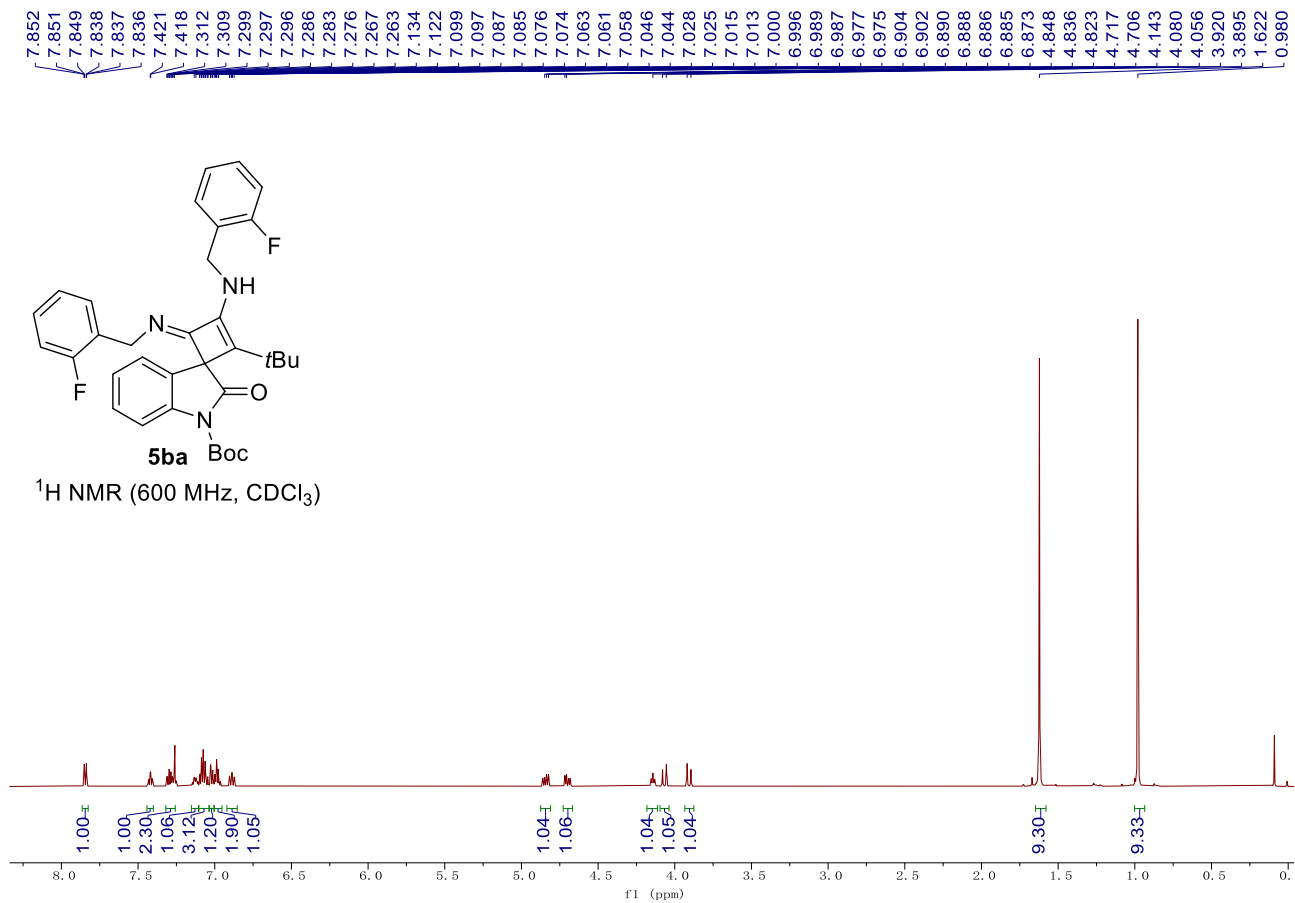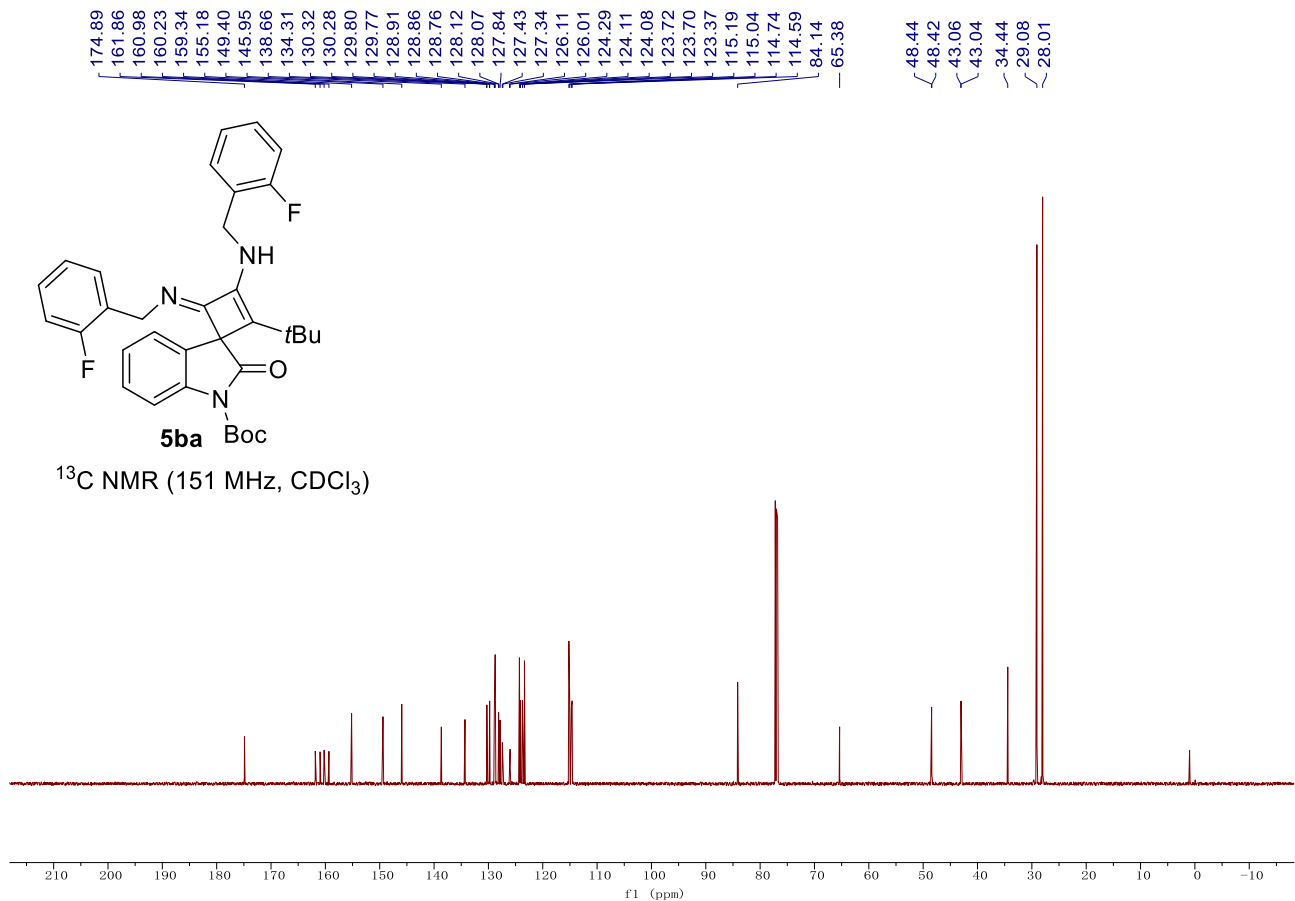

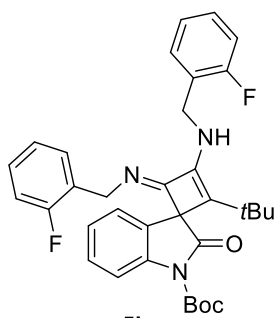

$^{19}\text{F}$  NMR (565 MHz,  $\text{CDCl}_3$ )

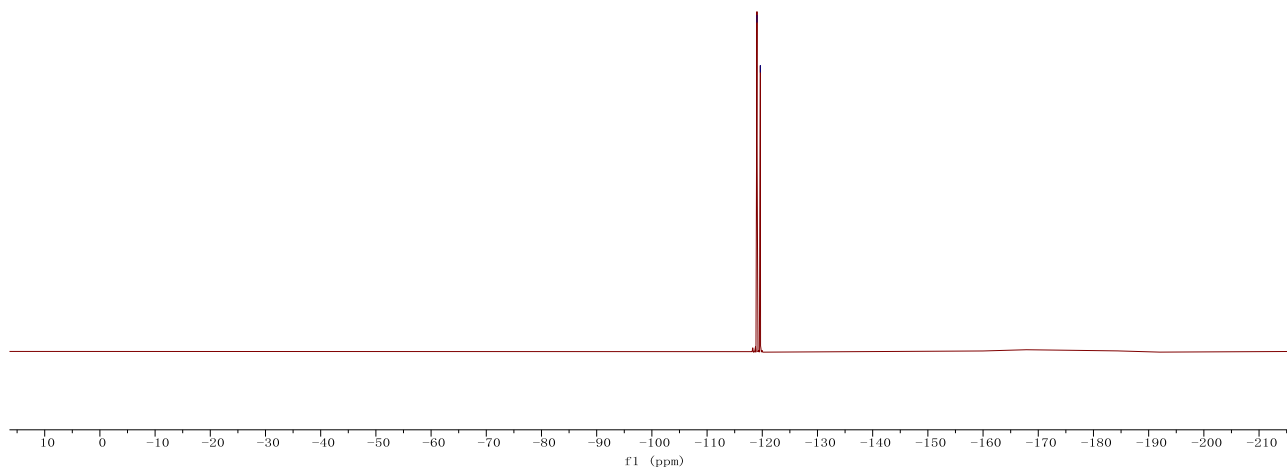



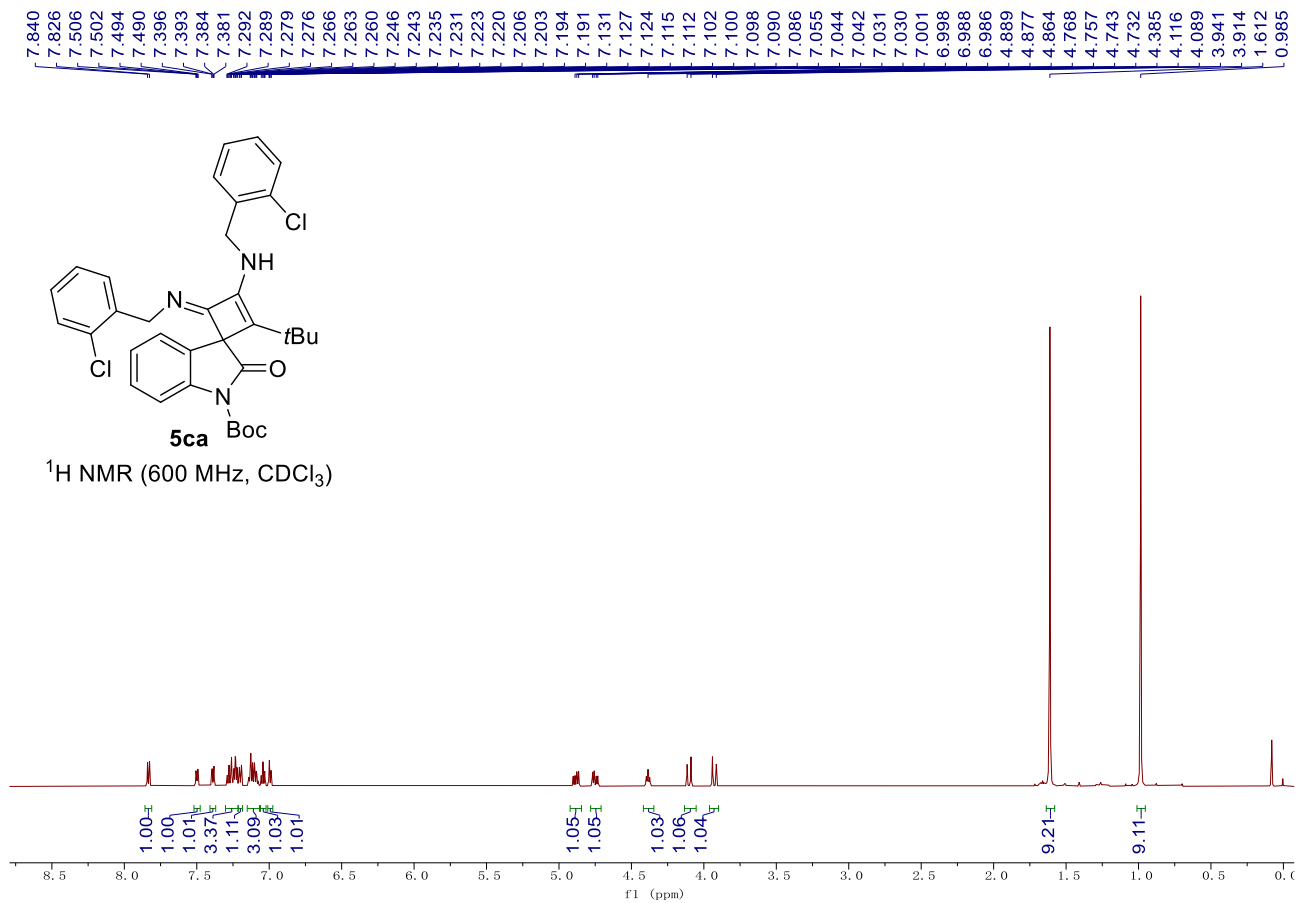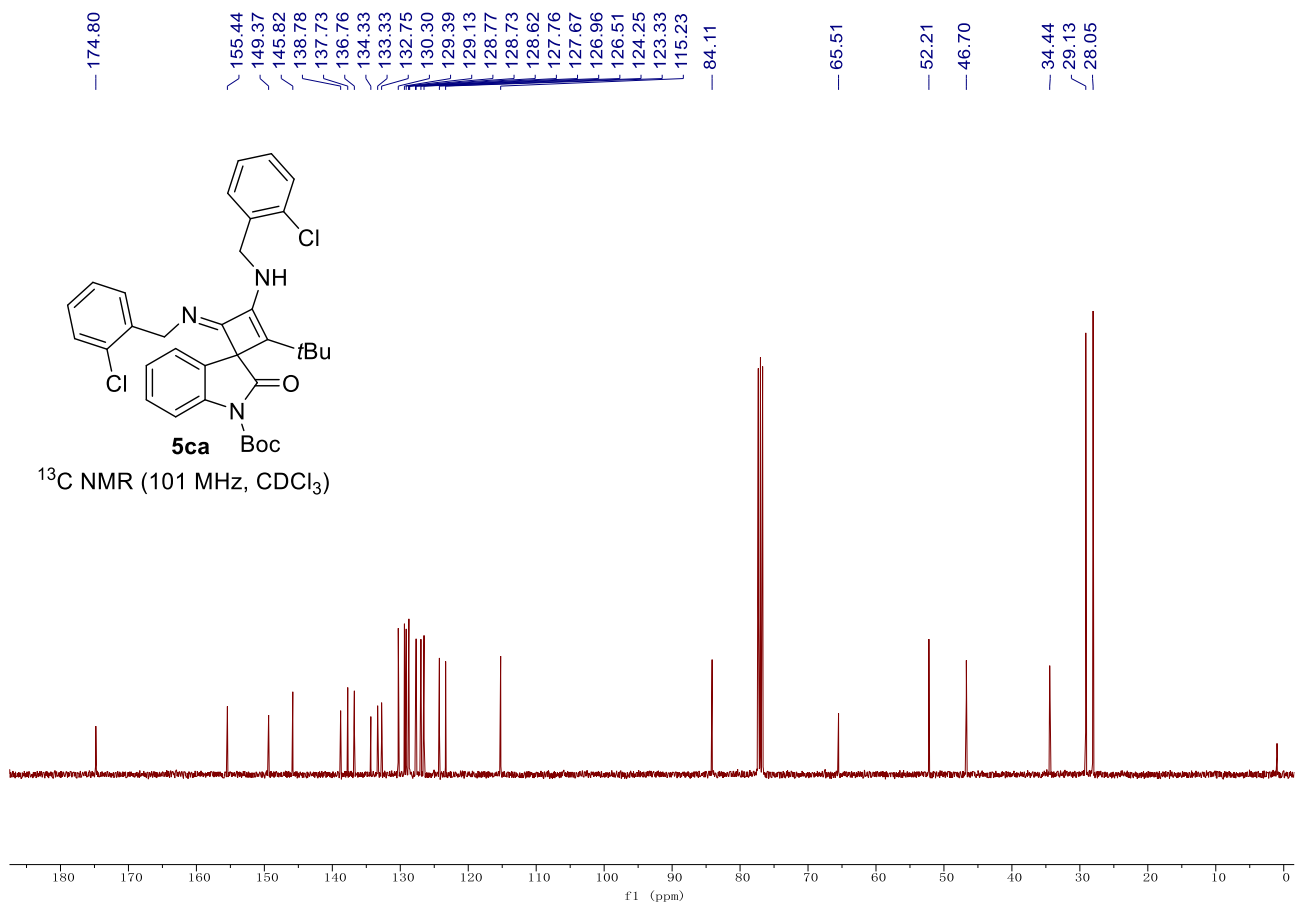

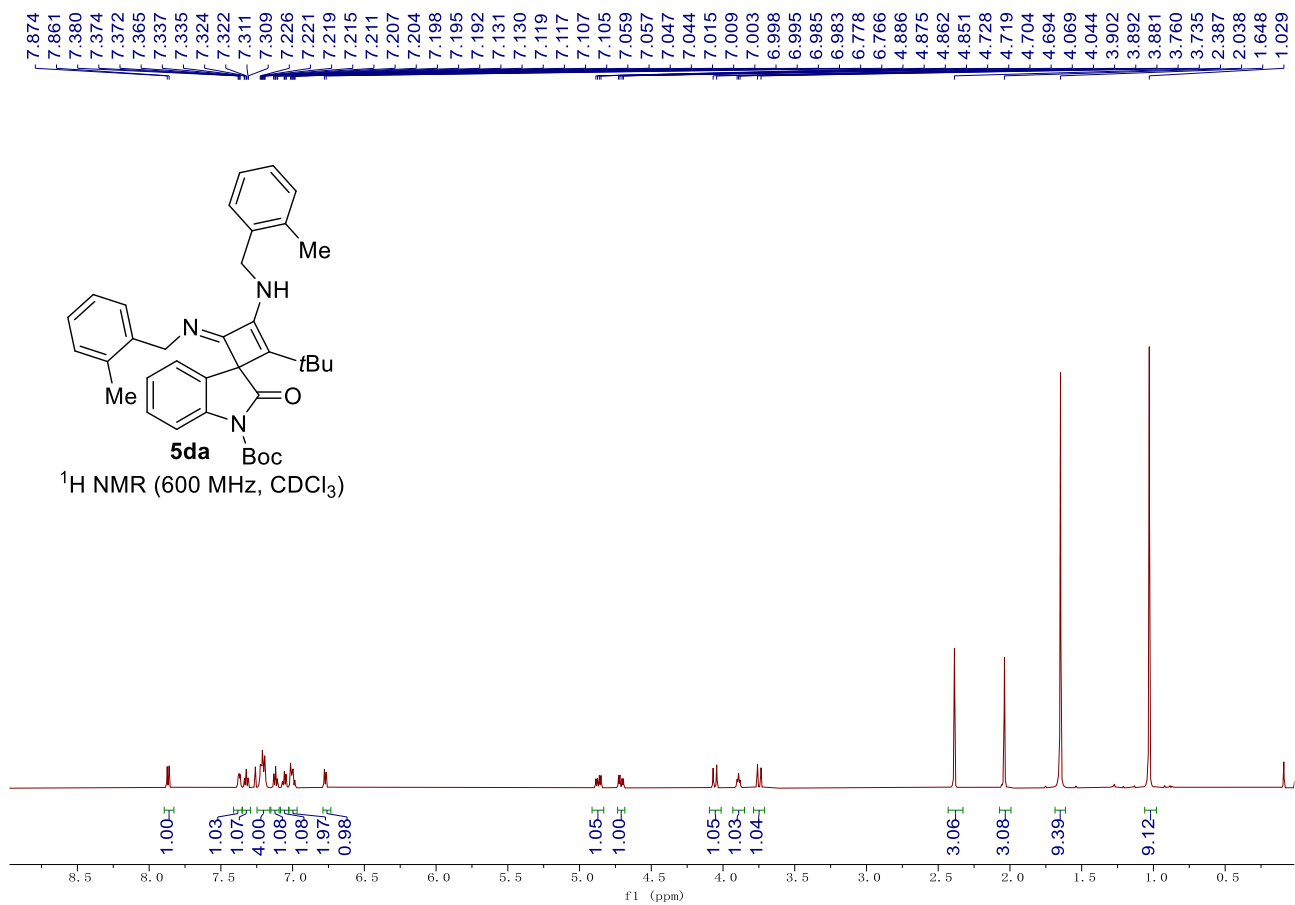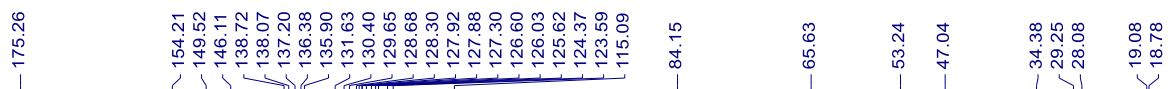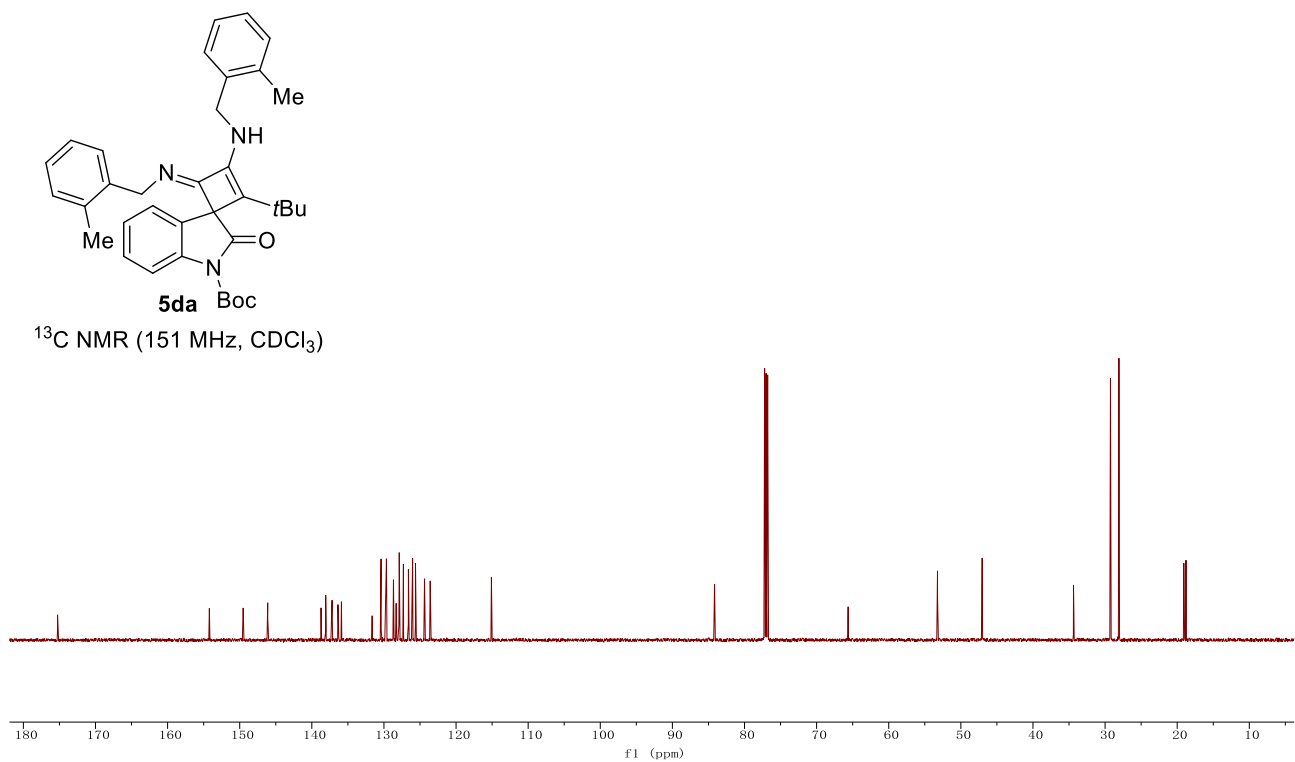

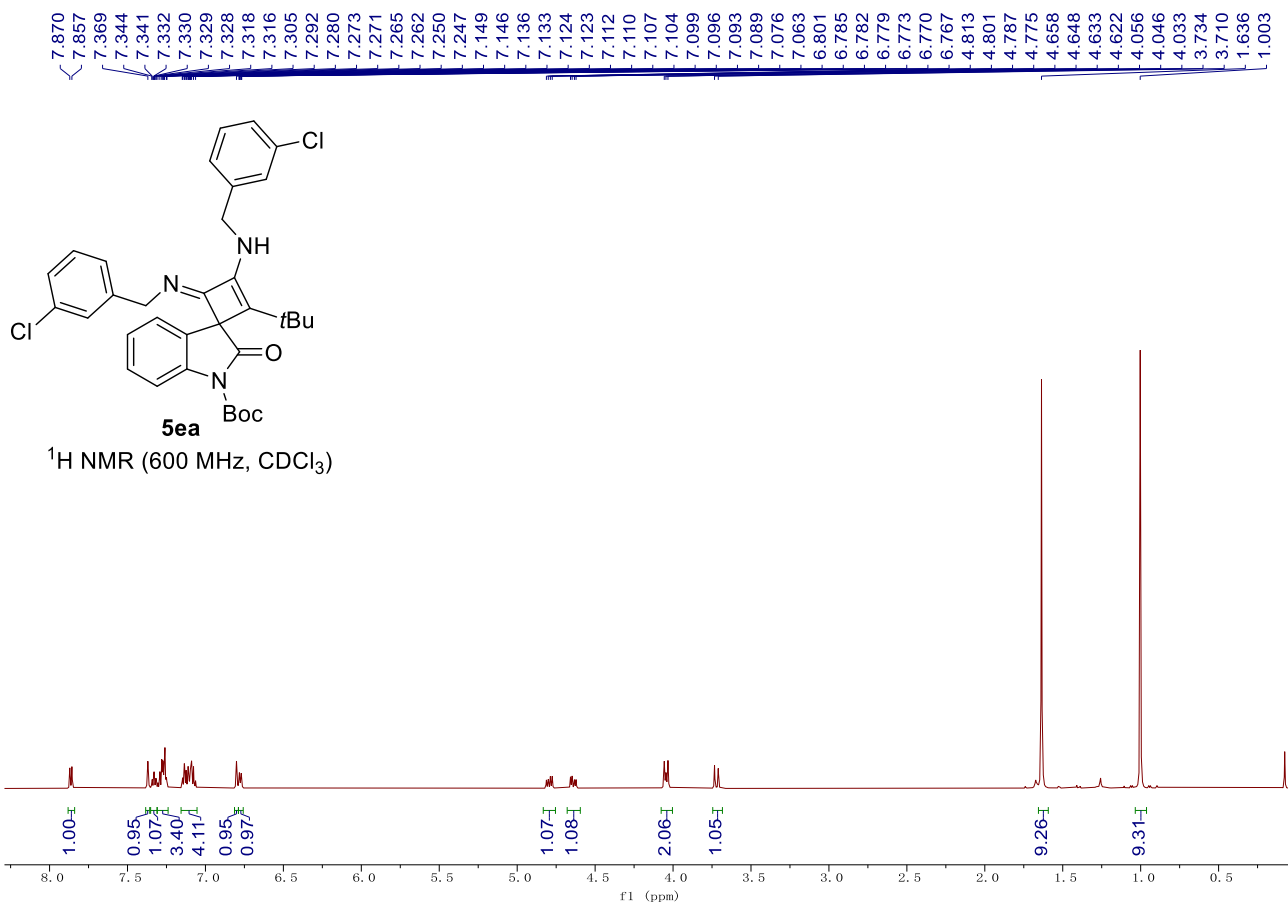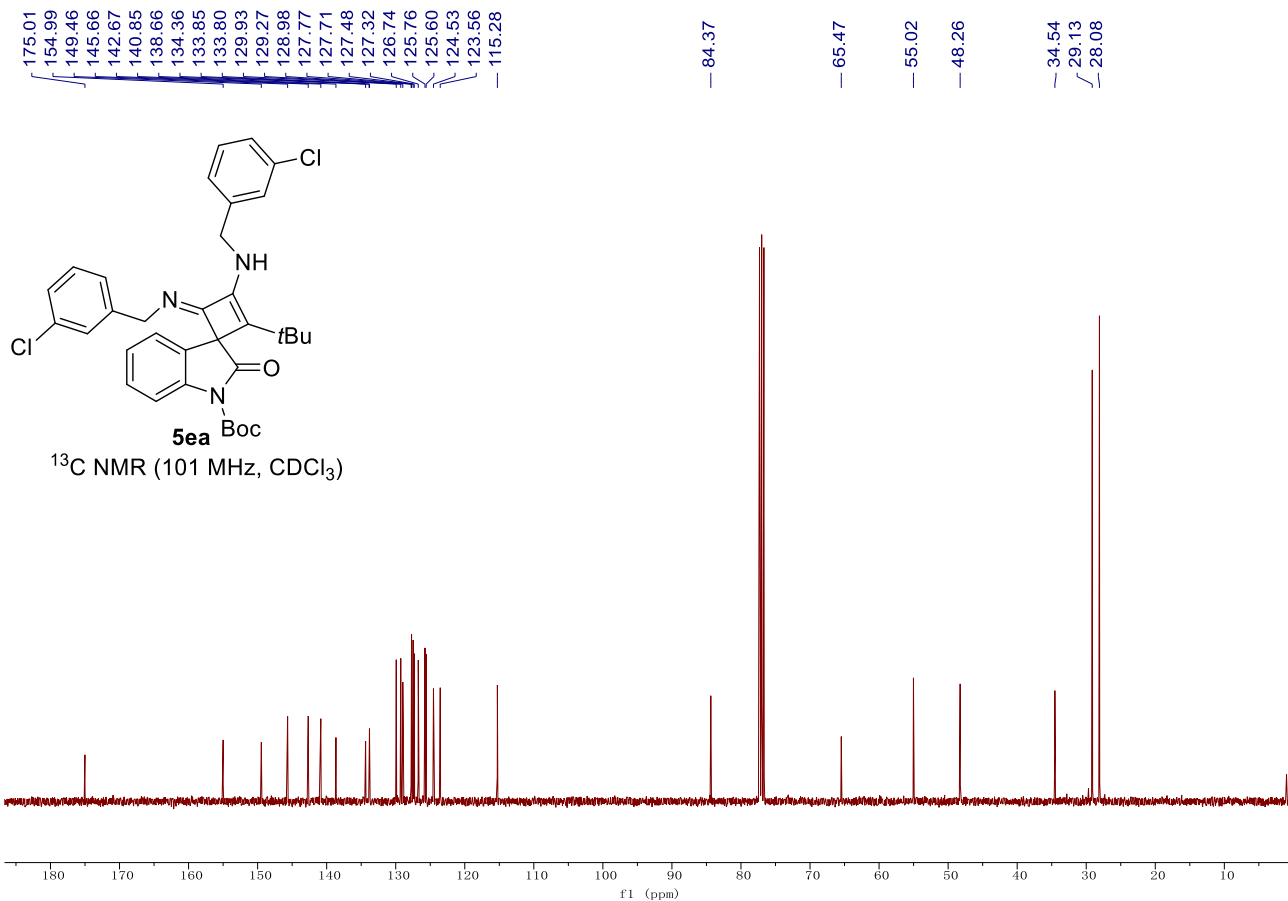

7.869  
7.856  
7.525  
7.421  
7.419  
7.418  
7.416  
7.408  
7.406  
7.405  
7.403  
7.349  
7.346  
7.337  
7.335  
7.334  
7.332  
7.323  
7.320  
7.310  
7.307  
7.305  
7.257  
7.243  
7.230  
7.217  
7.145  
7.136  
7.133  
7.130  
7.129  
7.119  
7.117  
7.105  
7.035  
7.022  
7.009  
6.929  
6.832  
6.830  
6.828  
6.819  
6.817  
6.815  
4.814  
4.801  
4.788  
4.776  
4.639  
4.629  
4.614  
4.603  
4.061  
4.056  
4.045  
4.037  
3.714  
3.690  
1.638  
1.002

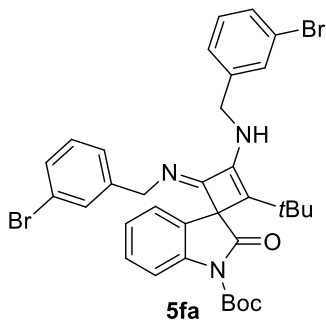

$^1\text{H NMR}$  (600 MHz,  $\text{CDCl}_3$ )

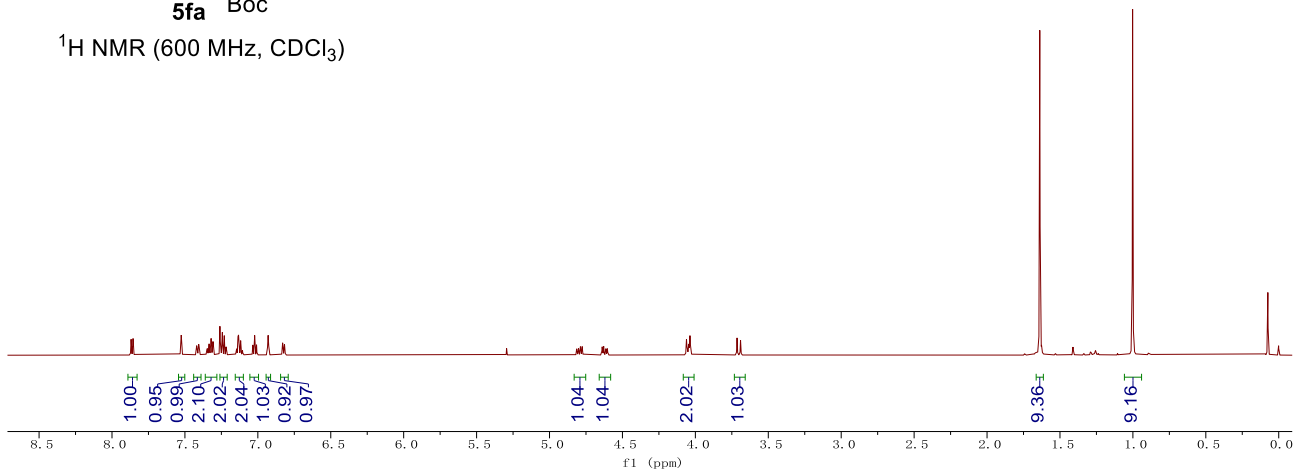

175.03  
154.98  
149.45  
145.62  
142.95  
141.11  
138.62  
133.95  
130.59  
130.37  
130.25  
129.67  
129.61  
129.01  
127.72  
126.25  
126.08  
124.58  
123.59  
122.59  
122.08  
115.28

84.39

65.45

55.01

48.19

34.55

29.13

28.09

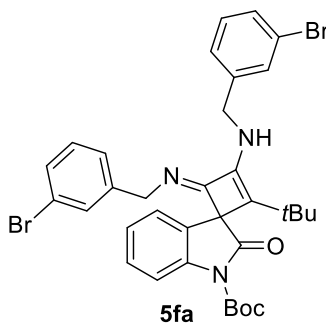

$^{13}\text{C NMR}$  (151 MHz,  $\text{CDCl}_3$ )

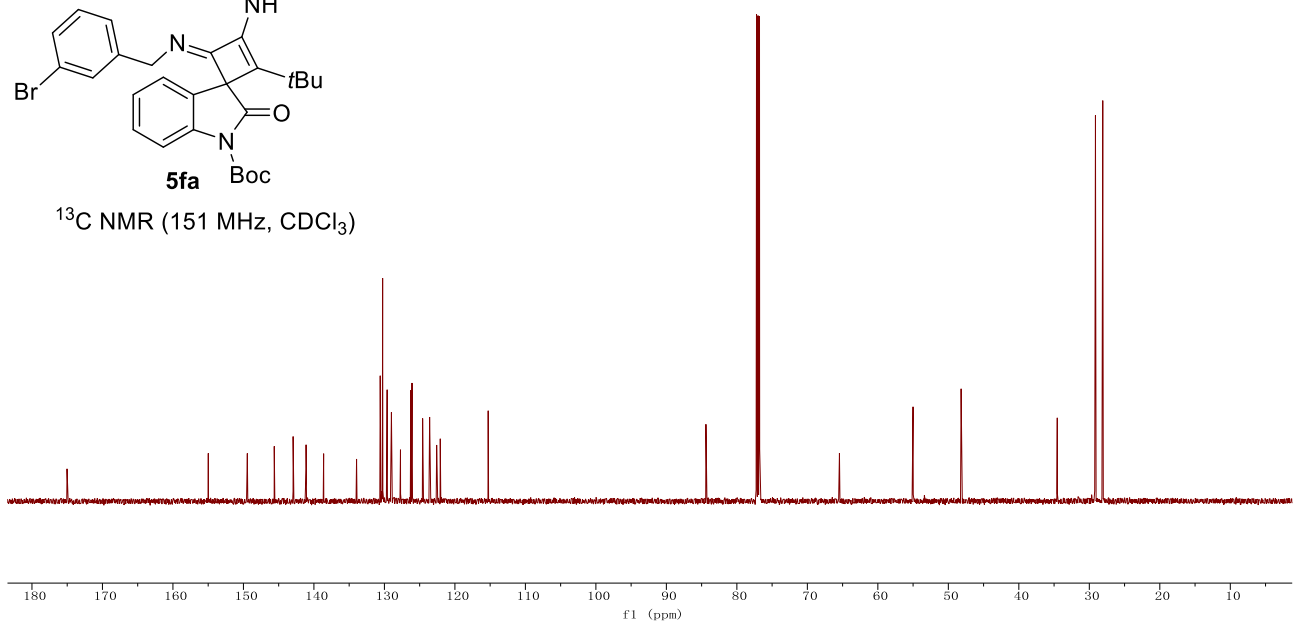

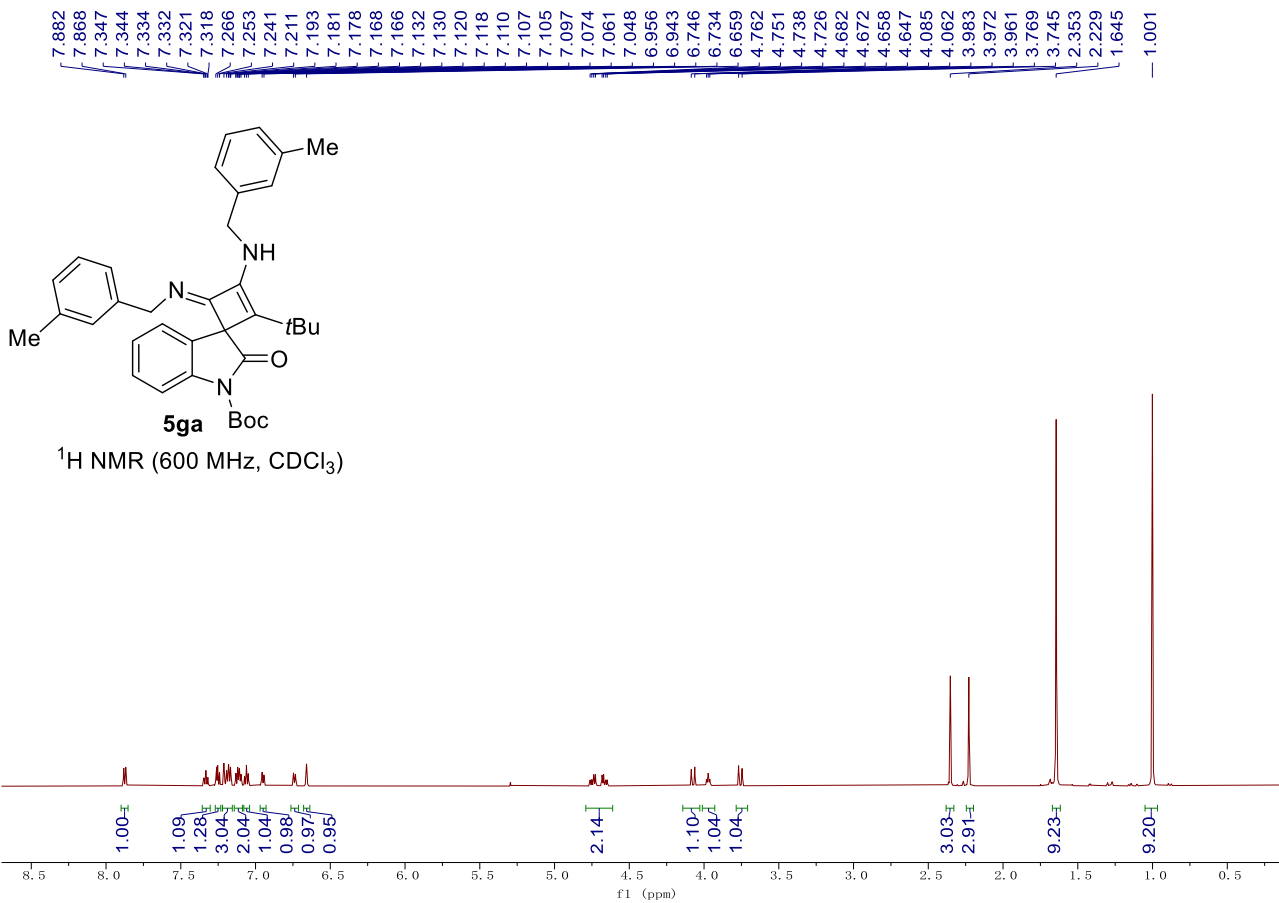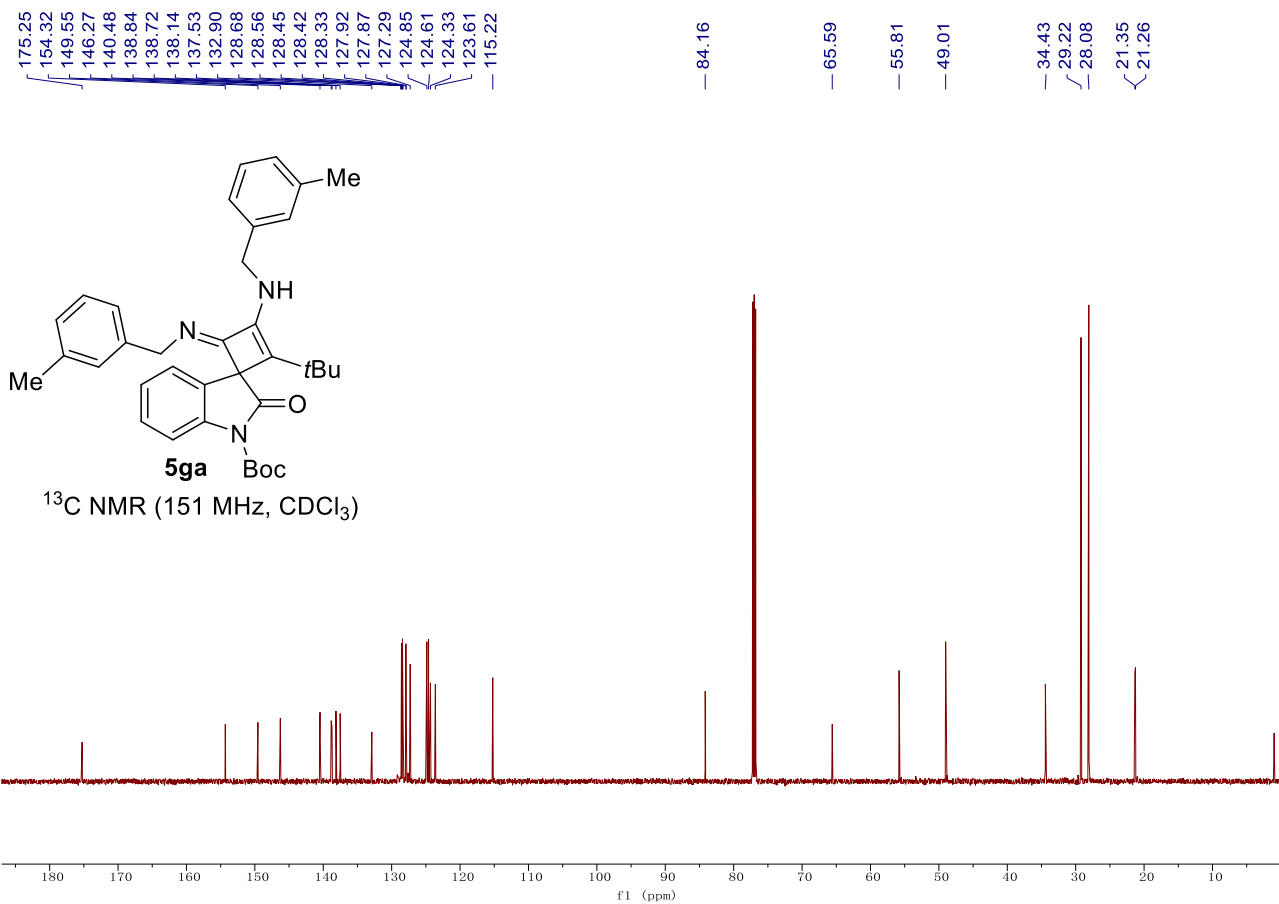

7.876  
7.856  
7.345  
7.342  
7.326  
7.322  
7.306  
7.303  
7.284  
7.264  
7.260  
7.244  
7.223  
7.219  
7.204  
7.201  
7.140  
7.138  
7.122  
7.119  
7.103  
7.101  
7.090  
7.069  
7.049  
6.967  
6.961  
6.956  
6.950  
6.839  
6.836  
6.833  
6.830  
6.817  
6.812  
6.699  
6.694  
6.689  
6.676  
6.670  
6.524  
6.519  
6.504  
4.784  
4.770  
4.747  
4.740  
4.732  
4.725  
4.702  
4.688  
4.056  
4.037  
4.021  
4.005  
3.815  
3.778  
3.693  
1.632  
1.002

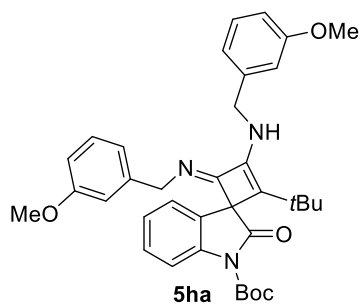

**5ha** Boc  
 $^1\text{H}$  NMR (400 MHz,  $\text{CDCl}_3$ )

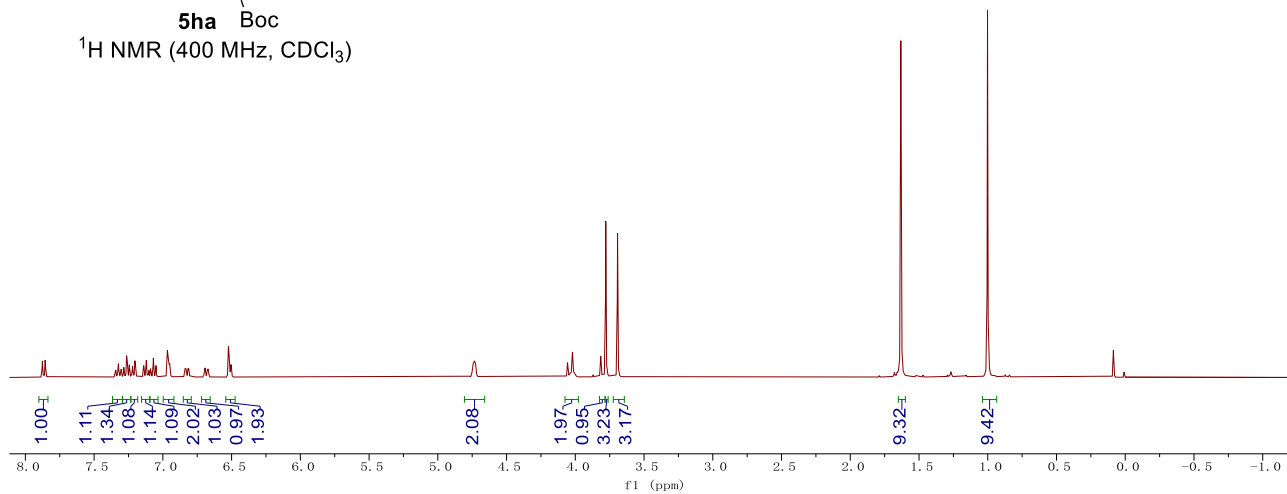

175.27  
159.92  
159.49  
154.65  
149.56  
146.17  
142.37  
140.59  
138.76  
133.07  
129.59  
129.03  
128.81  
128.25  
124.45  
123.60  
120.09  
119.72  
115.30  
113.21  
112.87  
112.71  
112.62

84.27

65.63

55.65

55.23

55.12

49.00

34.53

29.24

28.12

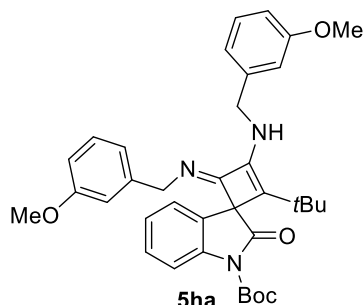

**5ha** Boc  
 $^{13}\text{C}$  NMR (101 MHz,  $\text{CDCl}_3$ )

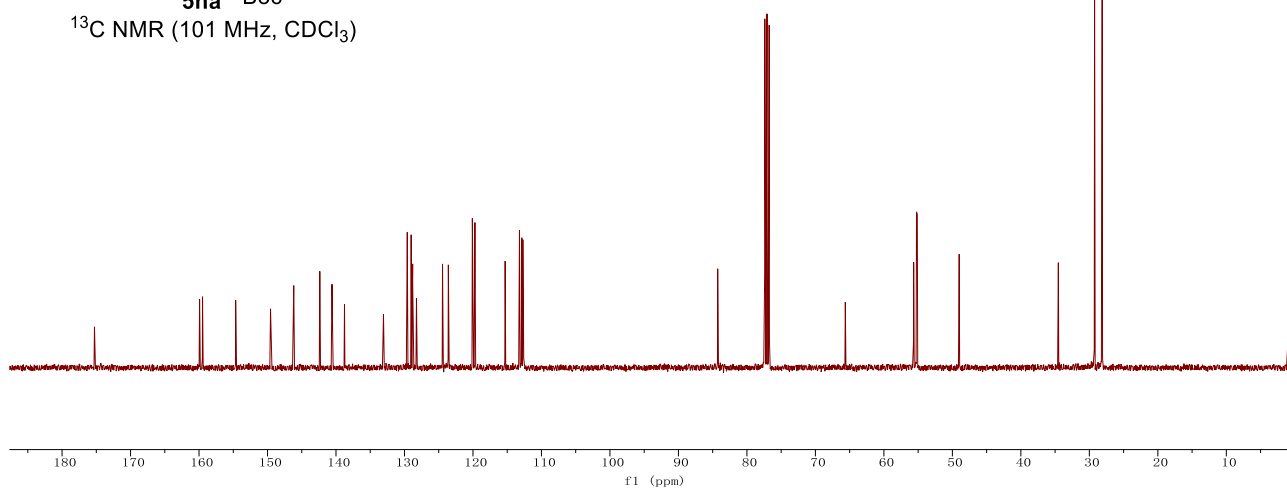

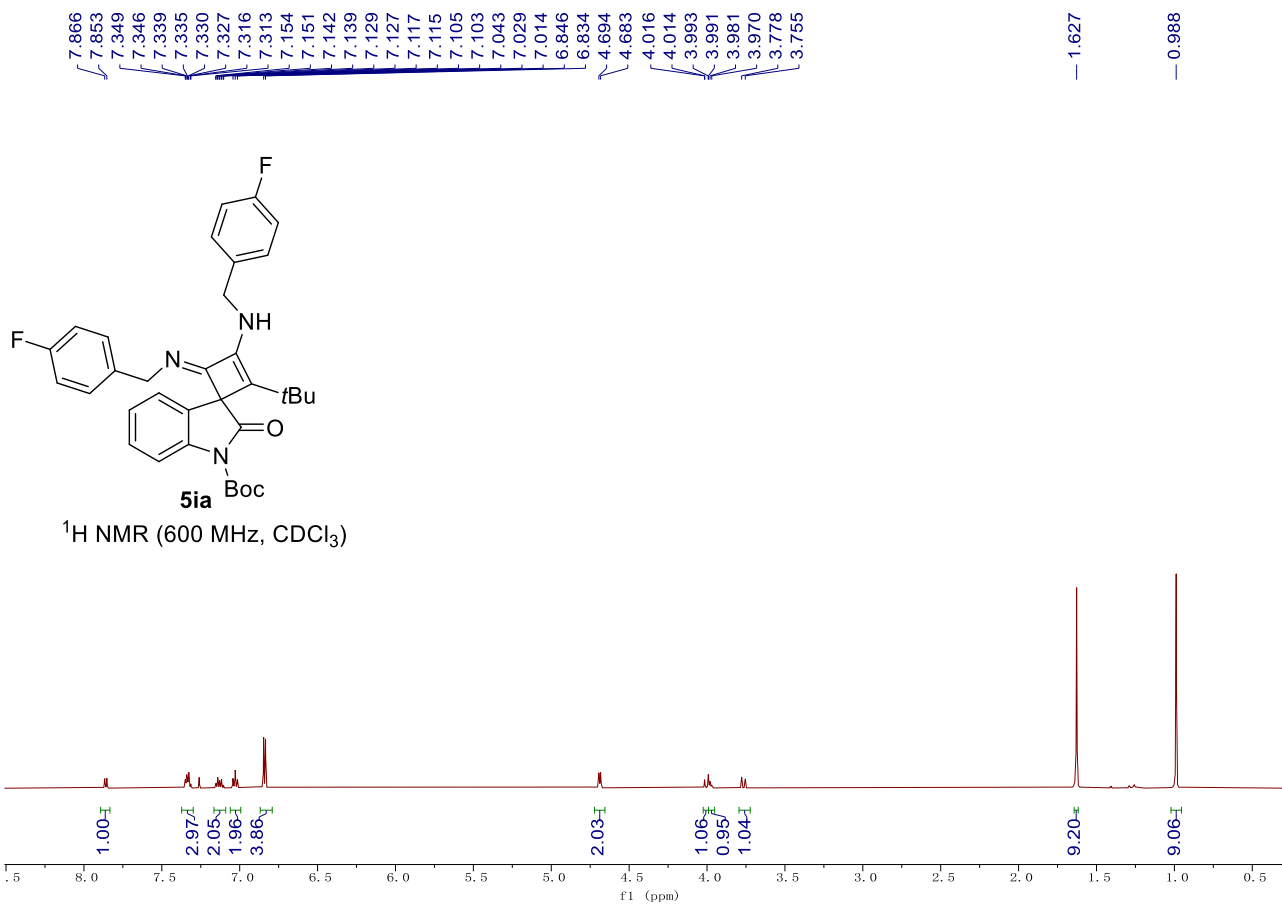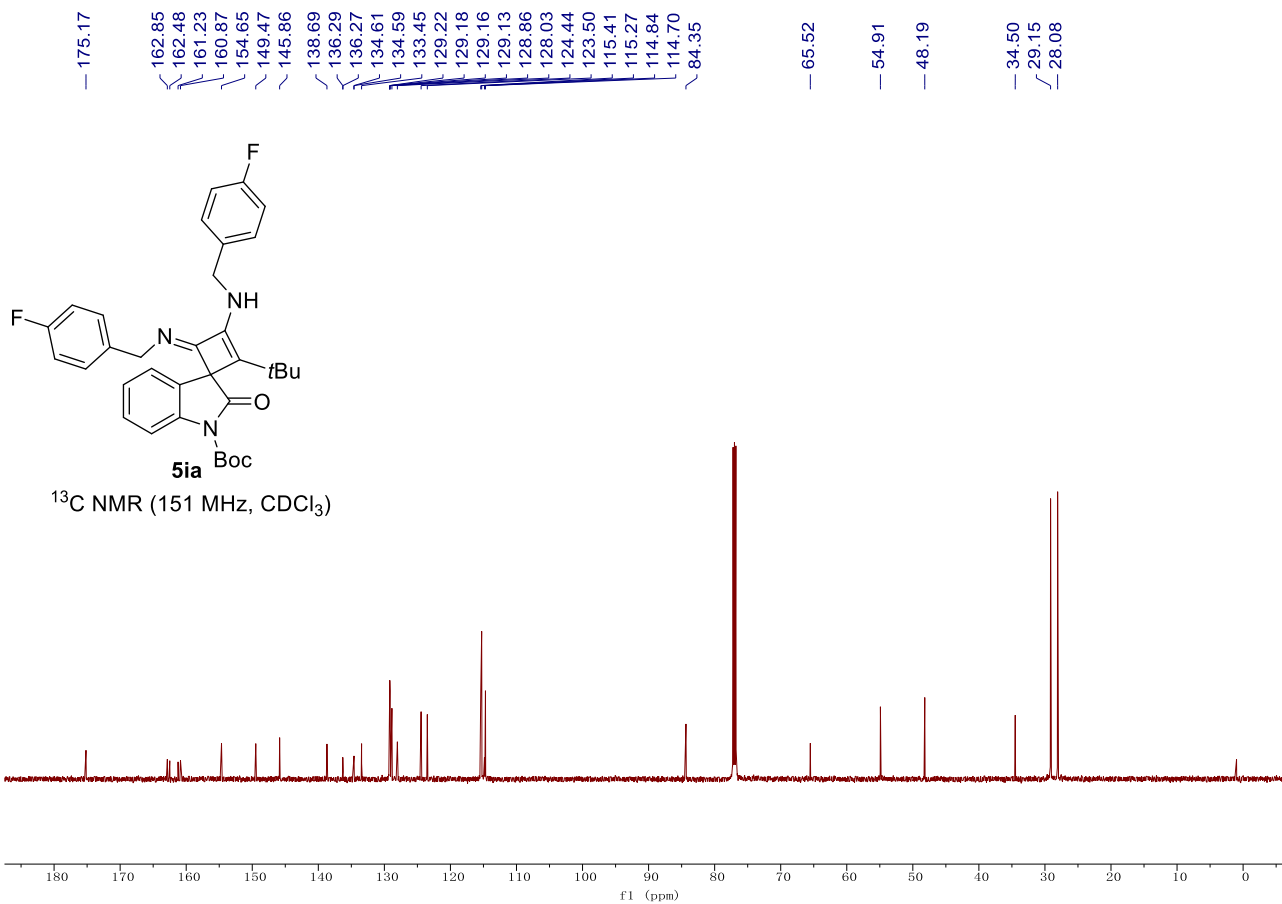

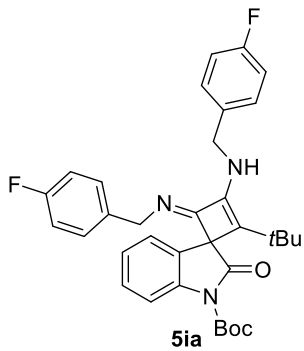

$^{19}\text{F}$  NMR (565 MHz,  $\text{CDCl}_3$ )

-115.564  
-116.488

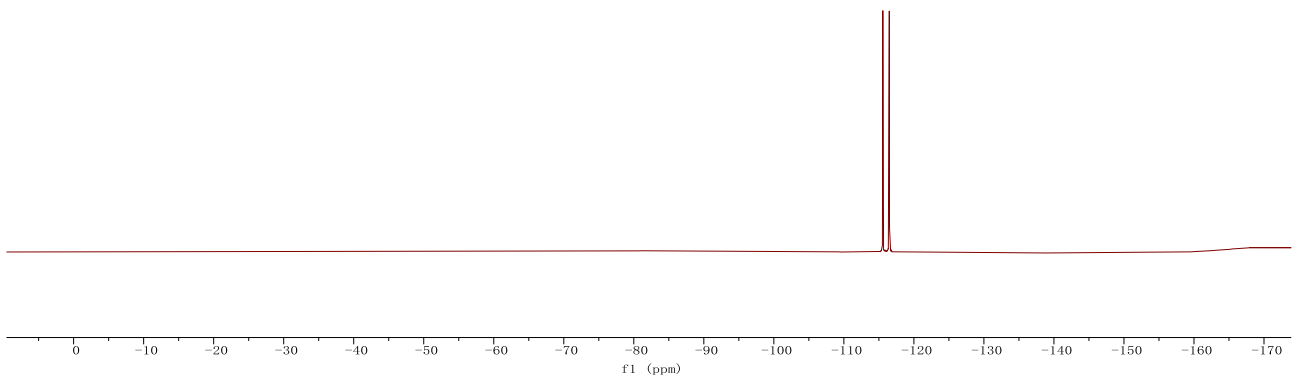



7.864  
7.850  
7.340  
7.336  
7.329  
7.326  
7.310  
7.296  
7.134  
7.124  
7.110  
7.100  
6.798  
6.784

4.701  
4.690  
4.032  
4.020  
4.006  
3.982  
3.760  
3.736

1.627  
0.993

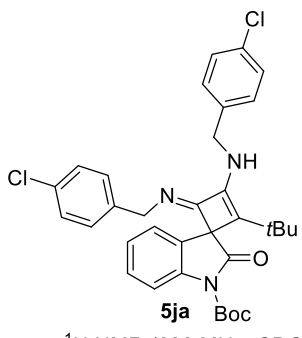

<sup>1</sup>H NMR (600 MHz, CDCl<sub>3</sub>)

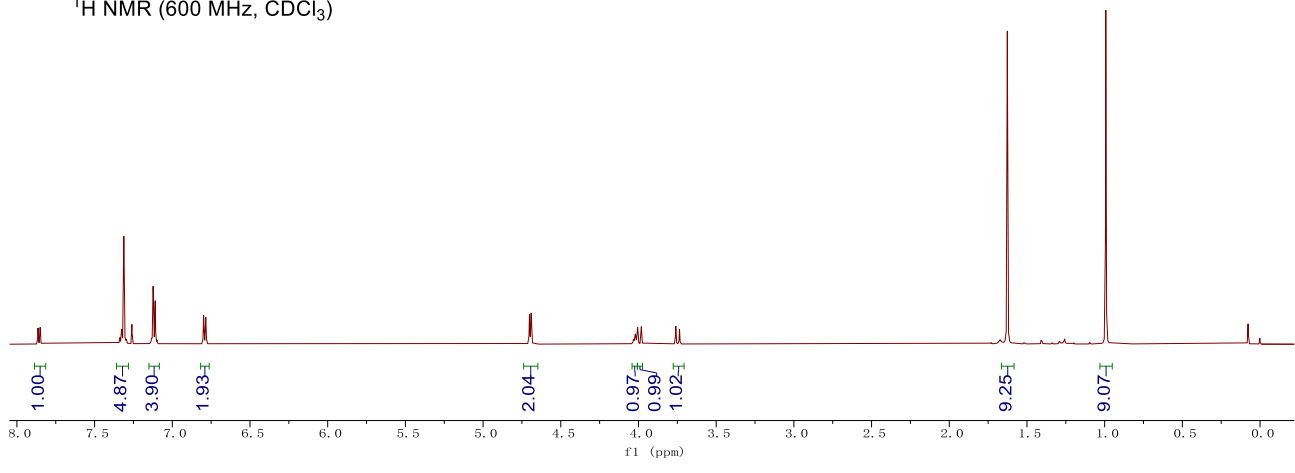

175.07  
154.82  
149.44  
145.71  
139.06  
138.67  
137.33  
133.53  
132.90  
132.28  
128.95  
128.89  
128.81  
128.66  
128.10  
127.90  
124.46  
123.48  
115.27

84.37  
65.47  
54.85  
48.14  
34.51  
29.12  
28.06

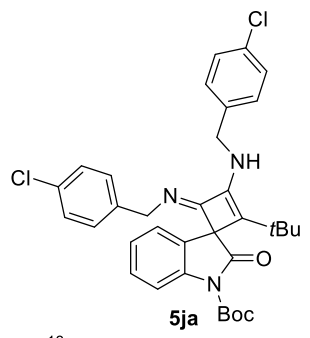

<sup>13</sup>C NMR (151 MHz, CDCl<sub>3</sub>)

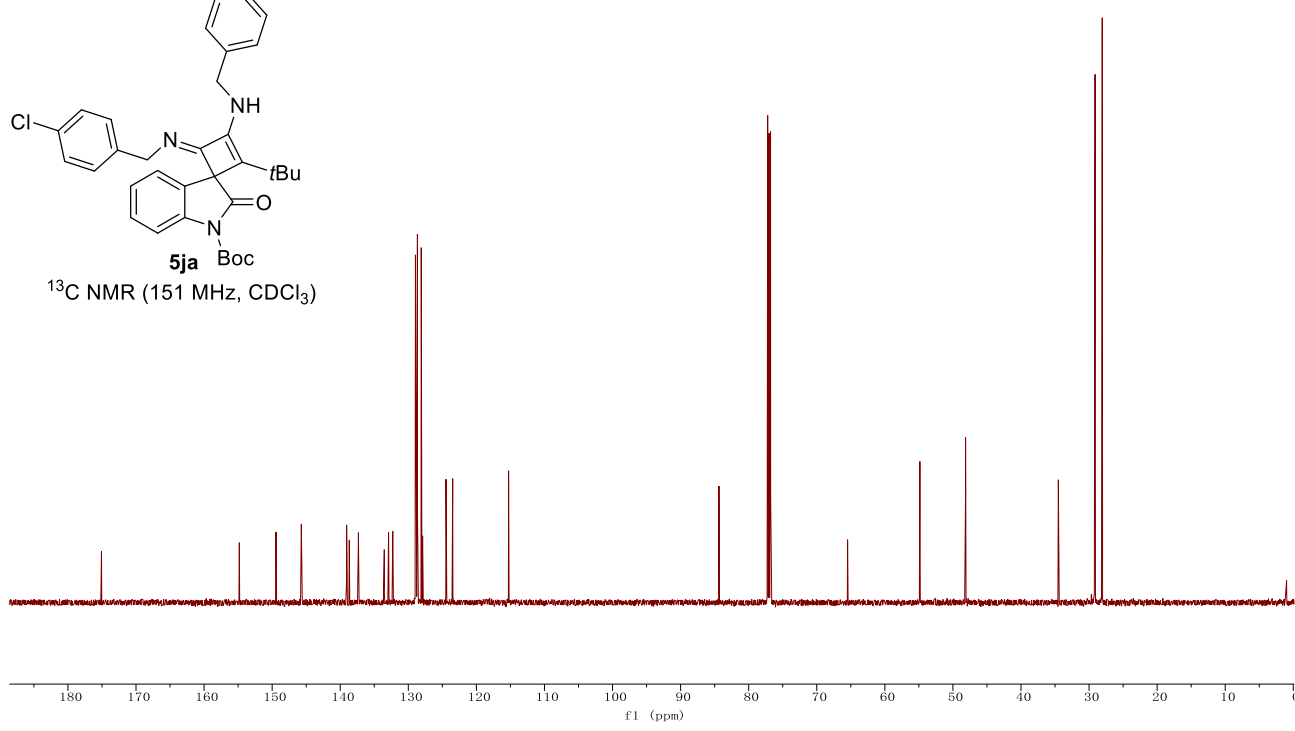

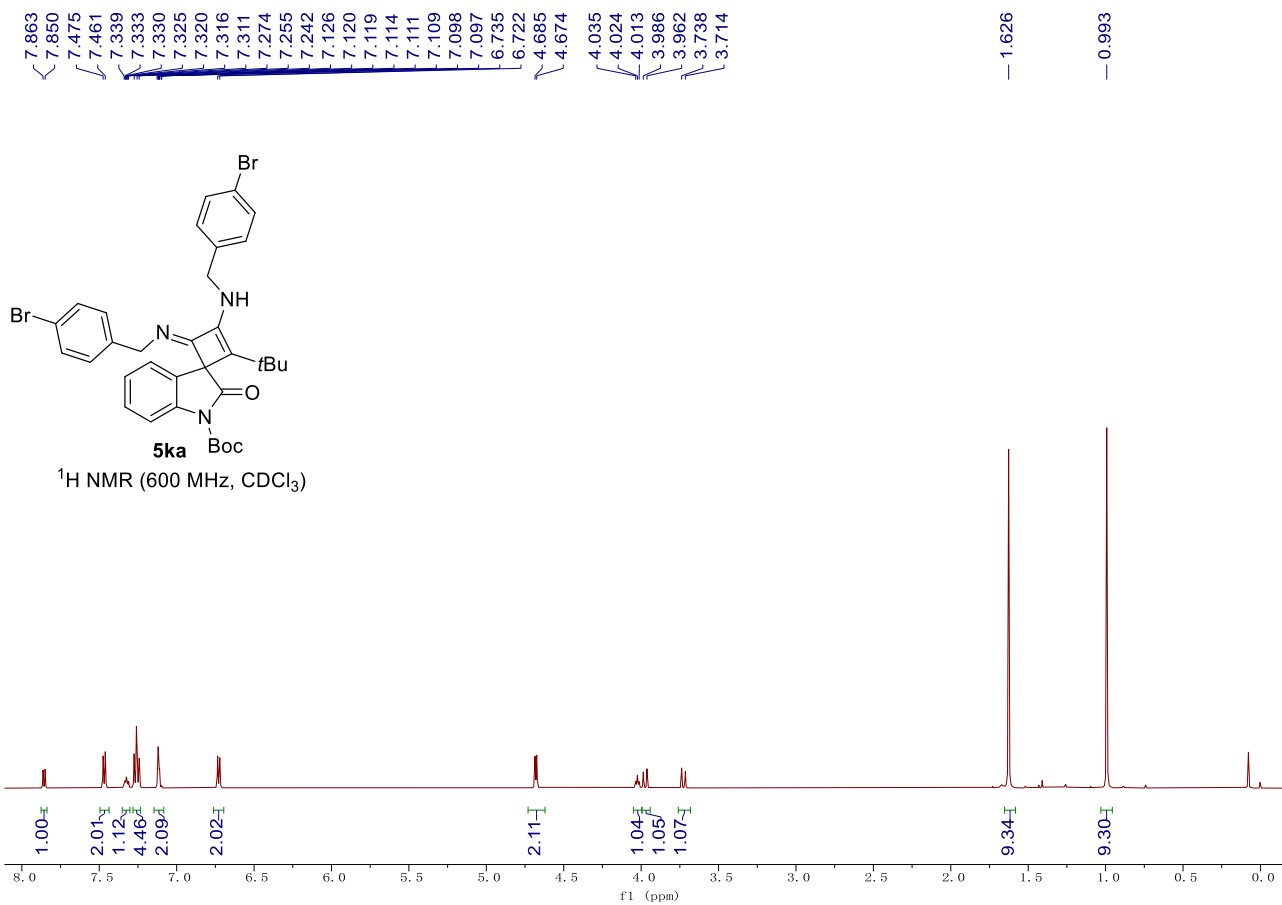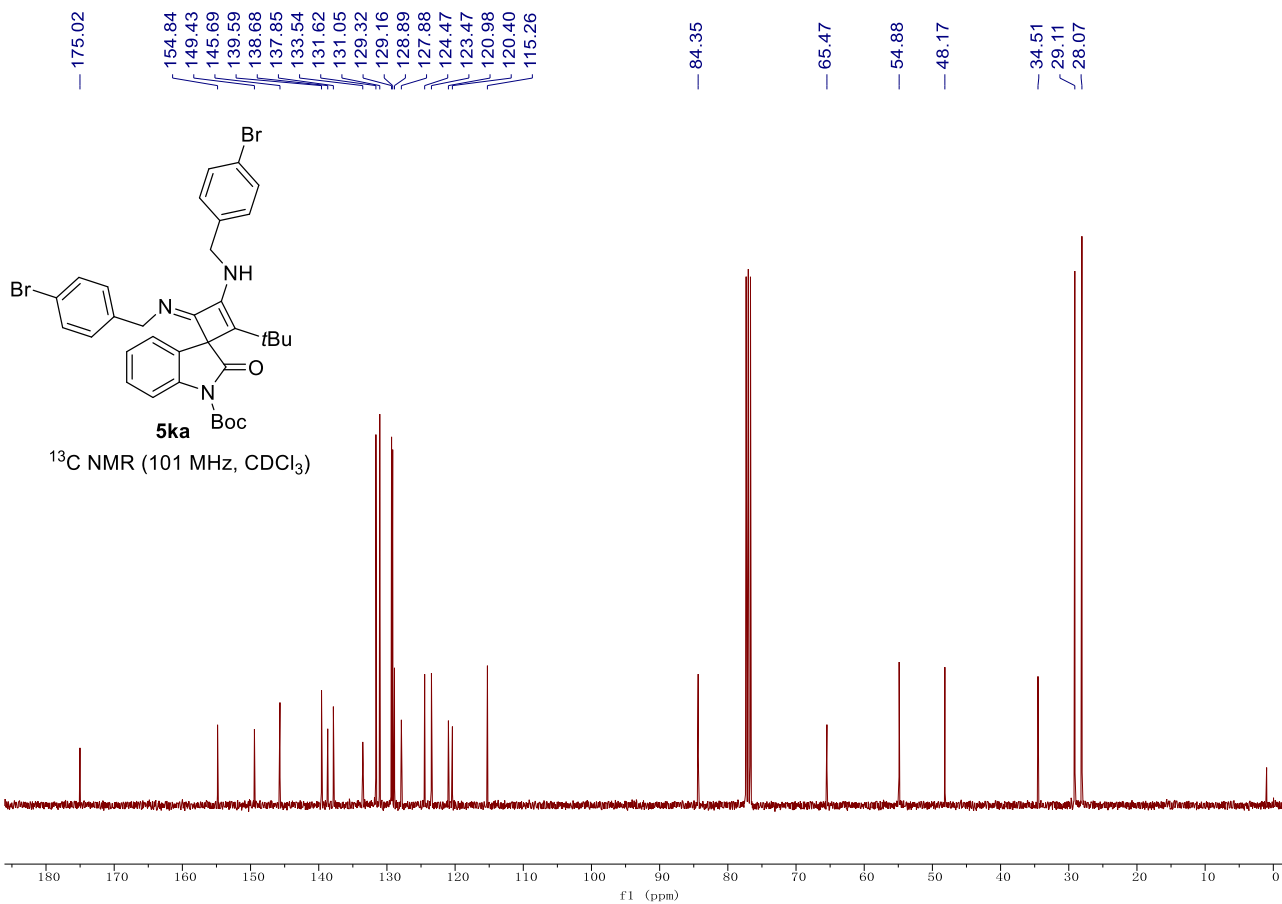

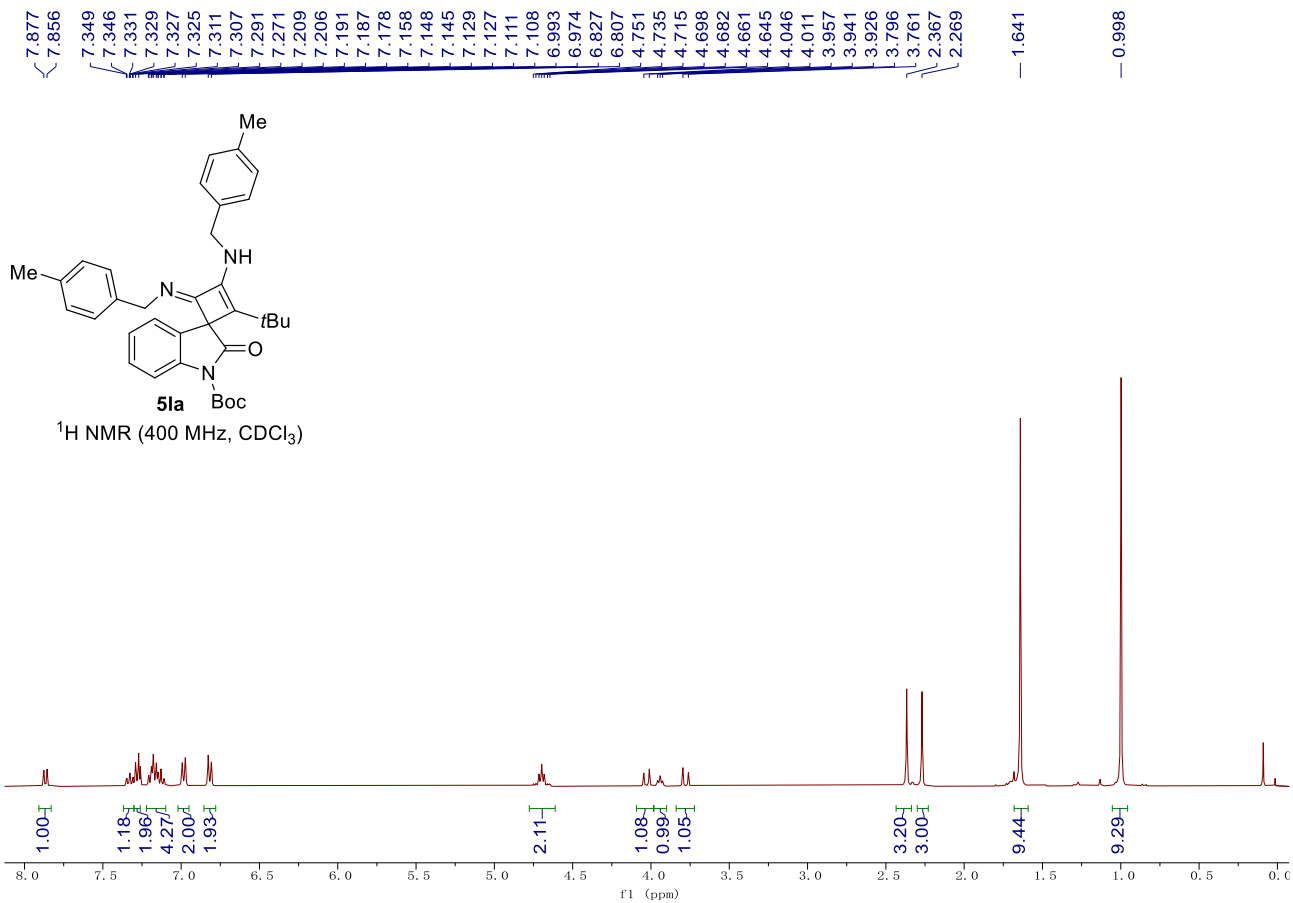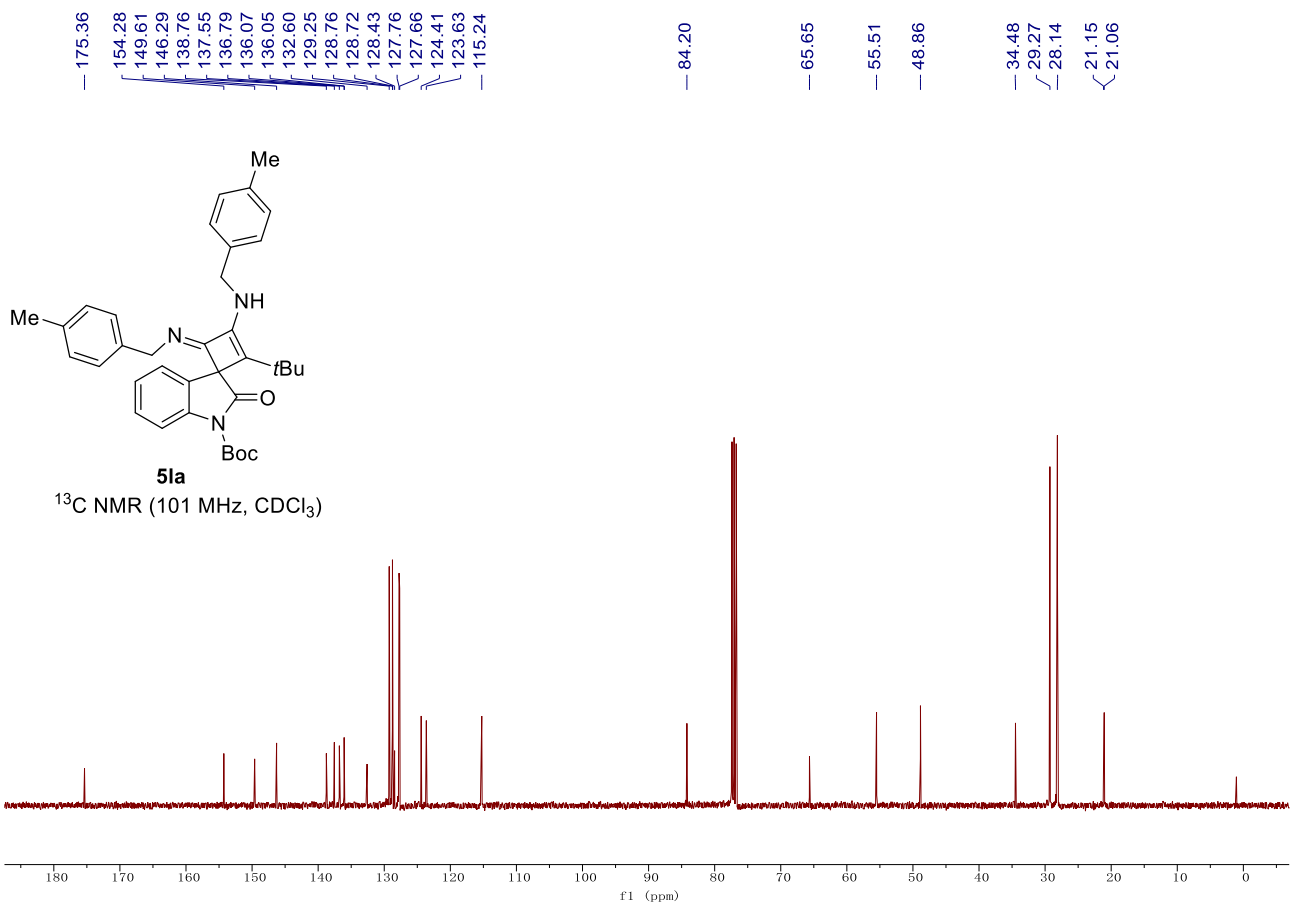

7.803  
7.790  
7.301  
7.298  
7.291  
7.288  
7.286  
7.278  
7.275  
7.265  
7.250  
7.247  
7.237  
7.235  
7.224  
7.221  
7.130  
7.127  
7.117  
7.114  
7.019  
7.017  
7.014  
7.006  
7.004  
6.994  
6.992  
6.899  
6.886  
6.875  
6.873  
6.834  
6.832  
6.821  
6.819  
6.809  
6.807  
6.722  
6.720  
6.709  
6.707  
4.722  
4.711  
4.698  
4.611  
4.601  
4.587  
4.577  
4.441  
4.431  
4.428  
4.079  
4.054  
3.873  
3.863  
3.669  
1.603  
0.937

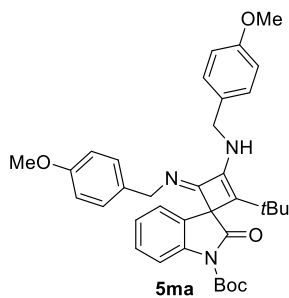

<sup>1</sup>H NMR (600 MHz, CDCl<sub>3</sub>)

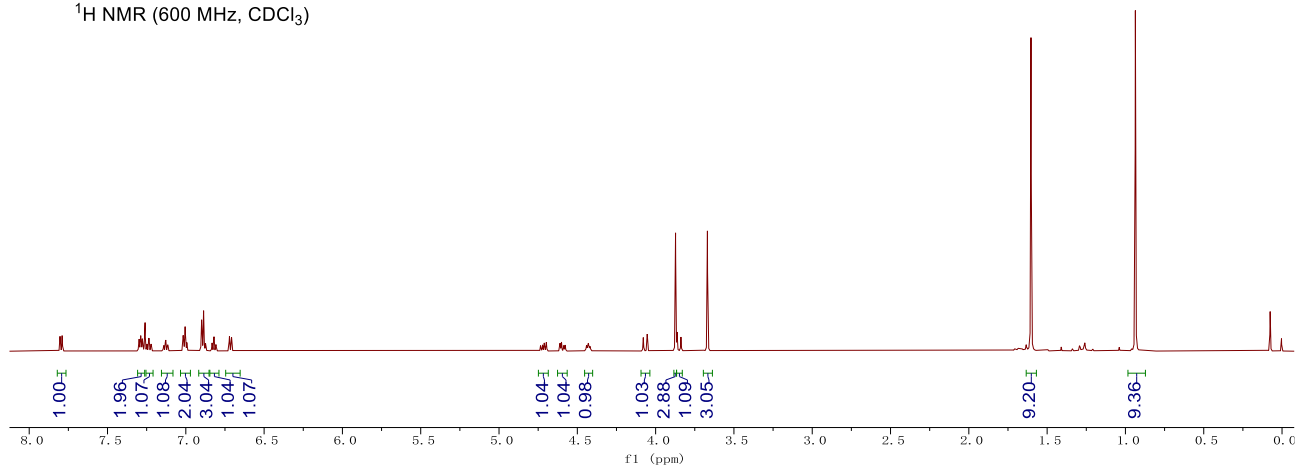

175.03  
157.49  
156.67  
154.63  
149.62  
147.00  
138.68  
134.06  
129.98  
128.97  
128.45  
128.43  
128.40  
128.35  
127.69  
127.51  
124.09  
123.43  
120.45  
120.20  
114.96  
109.99  
109.85  
83.86  
65.45  
55.16  
49.77  
45.23  
34.33  
29.15  
28.07

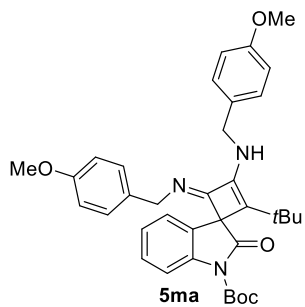

<sup>13</sup>C NMR (151 MHz, CDCl<sub>3</sub>)

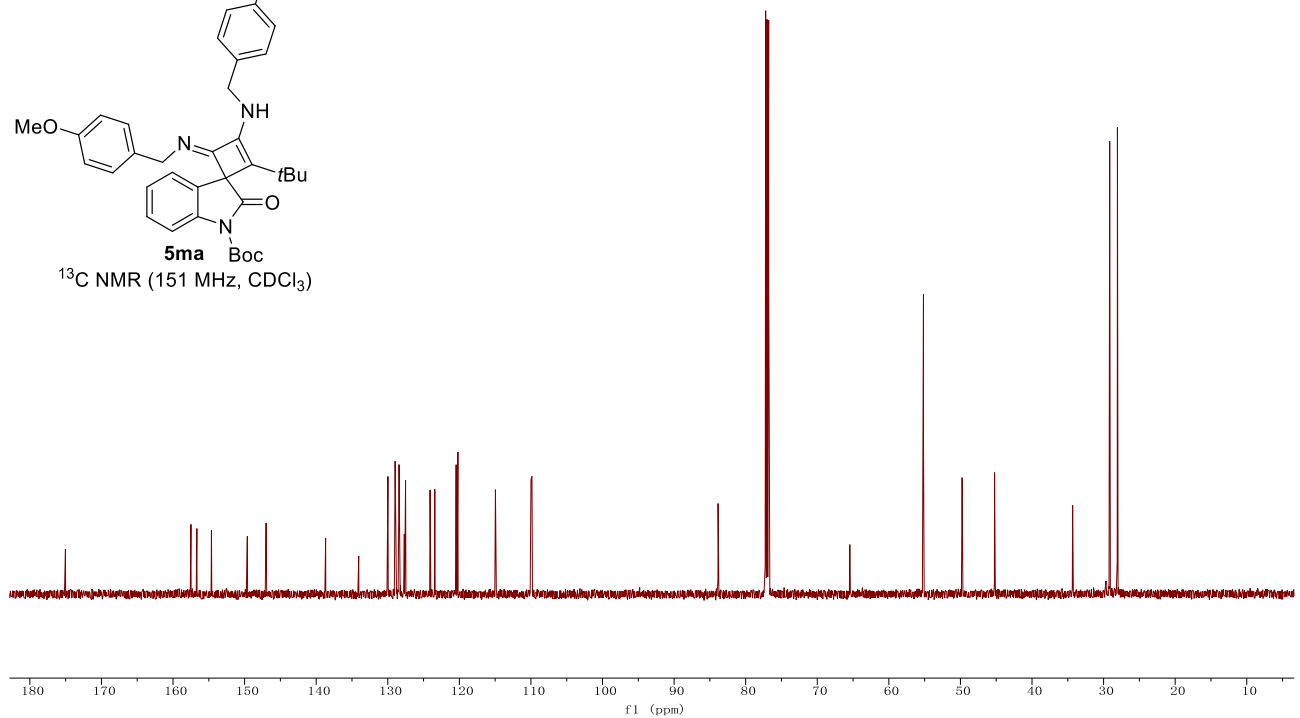

7.814  
7.804  
7.797  
7.273  
7.266  
7.254  
7.195  
7.184  
7.177  
7.116  
7.105  
7.098  
3.764  
3.756  
3.324  
3.314  
3.306  
3.296  
2.542  
2.533  
2.522  
2.512  
2.503  
1.782  
1.765  
1.745  
1.721  
1.637  
1.619  
1.607  
1.543  
1.527  
1.517  
1.466  
1.445  
1.407  
1.386  
1.273  
1.263  
1.252  
1.244  
1.236  
1.228  
1.180  
1.163  
1.158  
1.142  
1.137  
1.111  
1.089  
1.075  
1.056  
0.995  
0.981  
0.975  
0.963  
0.941  
0.718  
0.698  
0.589

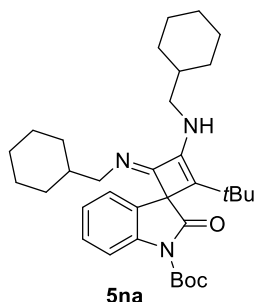

$^1\text{H NMR}$  (600 MHz,  $\text{CDCl}_3$ )

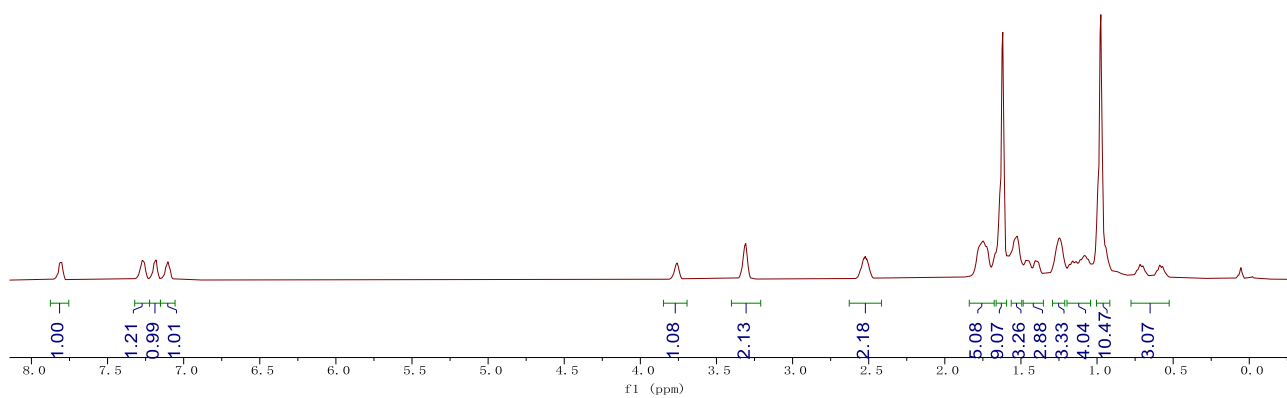

175.50  
153.35  
149.66  
146.60  
138.59  
129.84  
128.95  
128.29  
124.09  
123.37  
114.94  
83.83  
65.67  
58.34  
53.37  
51.04  
39.61  
39.14  
34.17  
31.09  
31.02  
30.51  
29.24  
28.08  
26.58  
26.45  
26.00  
25.96  
25.93  
25.89

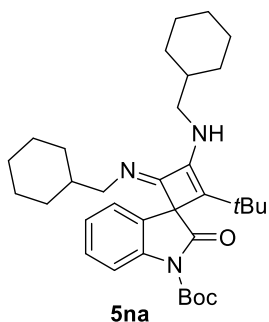

$^{13}\text{C NMR}$  (151 MHz,  $\text{CDCl}_3$ )

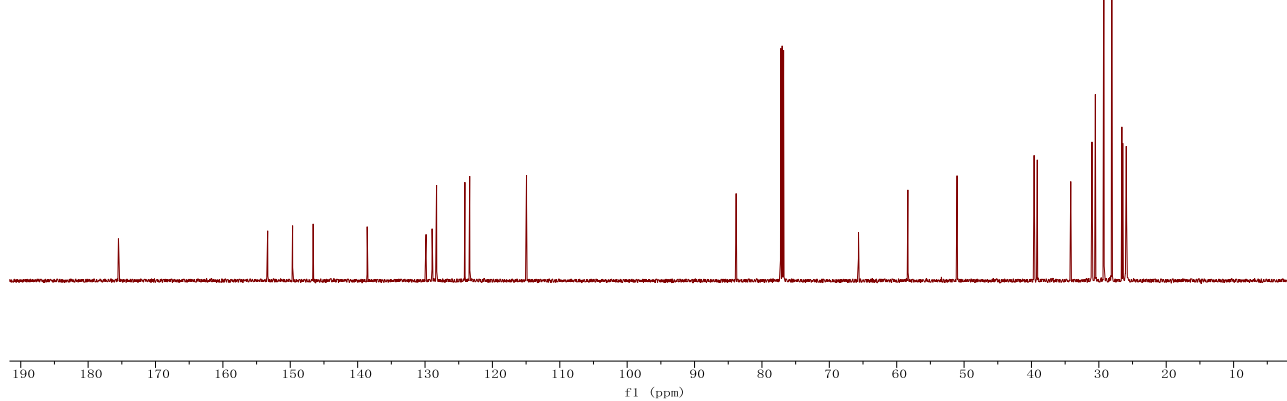

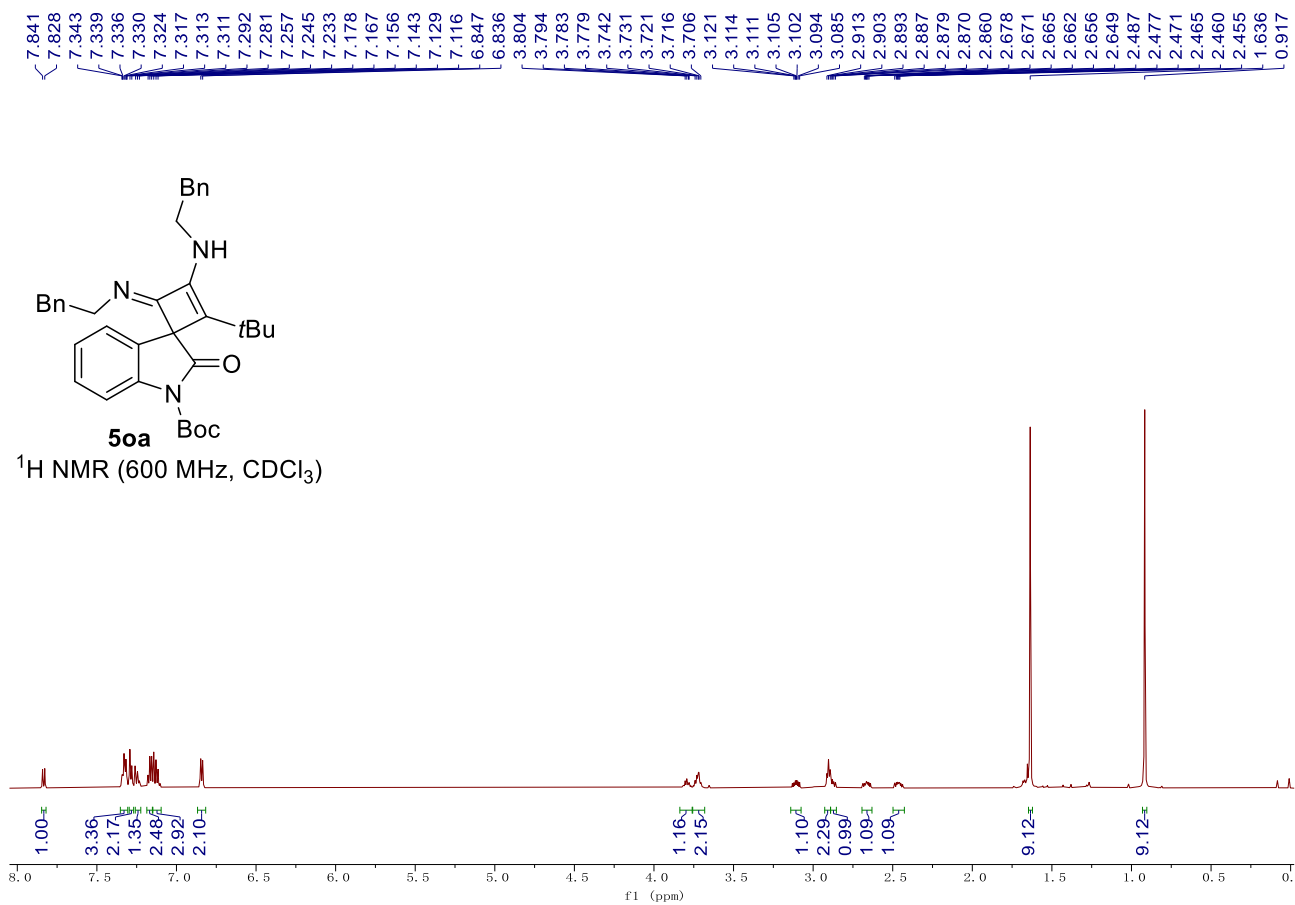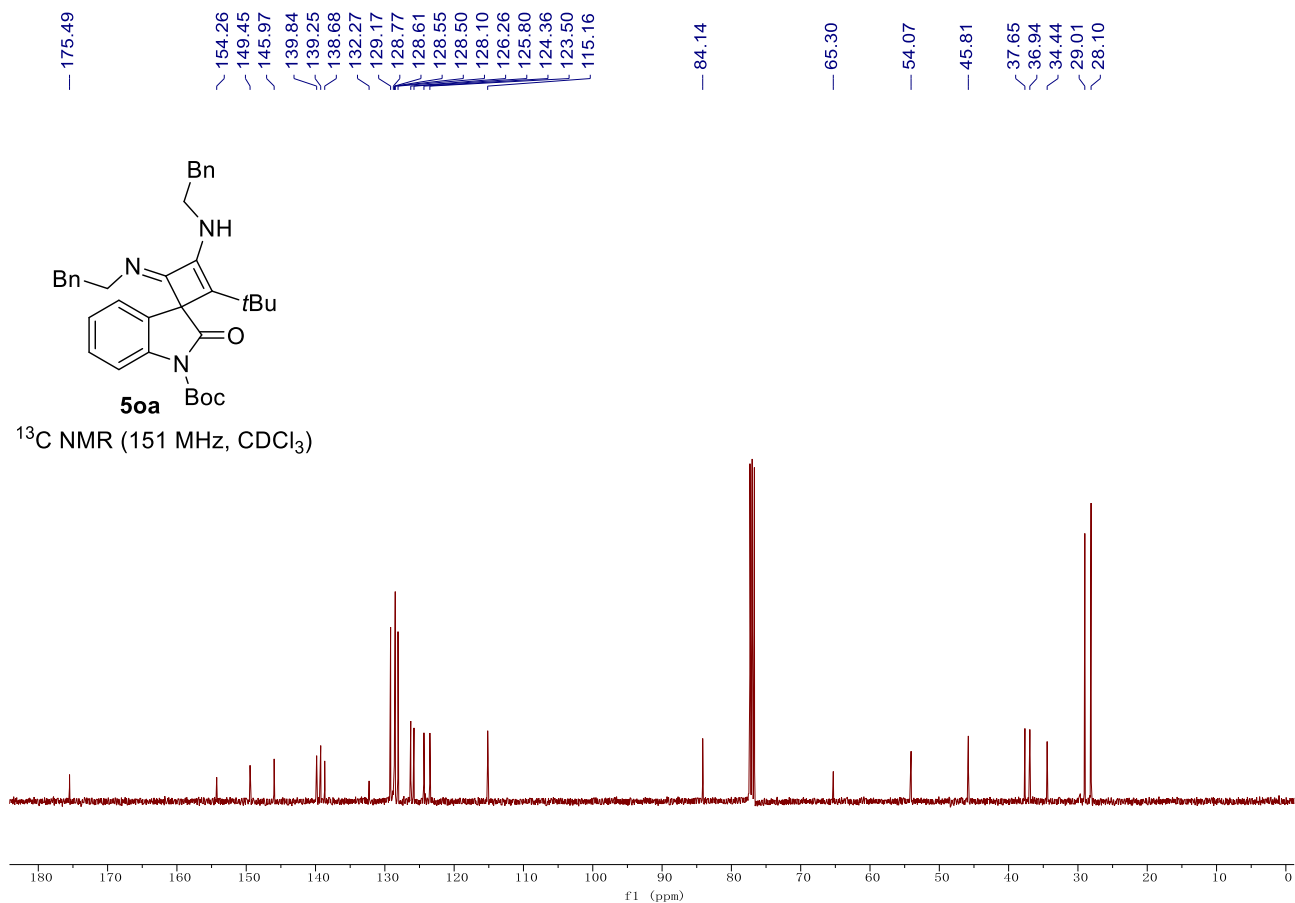

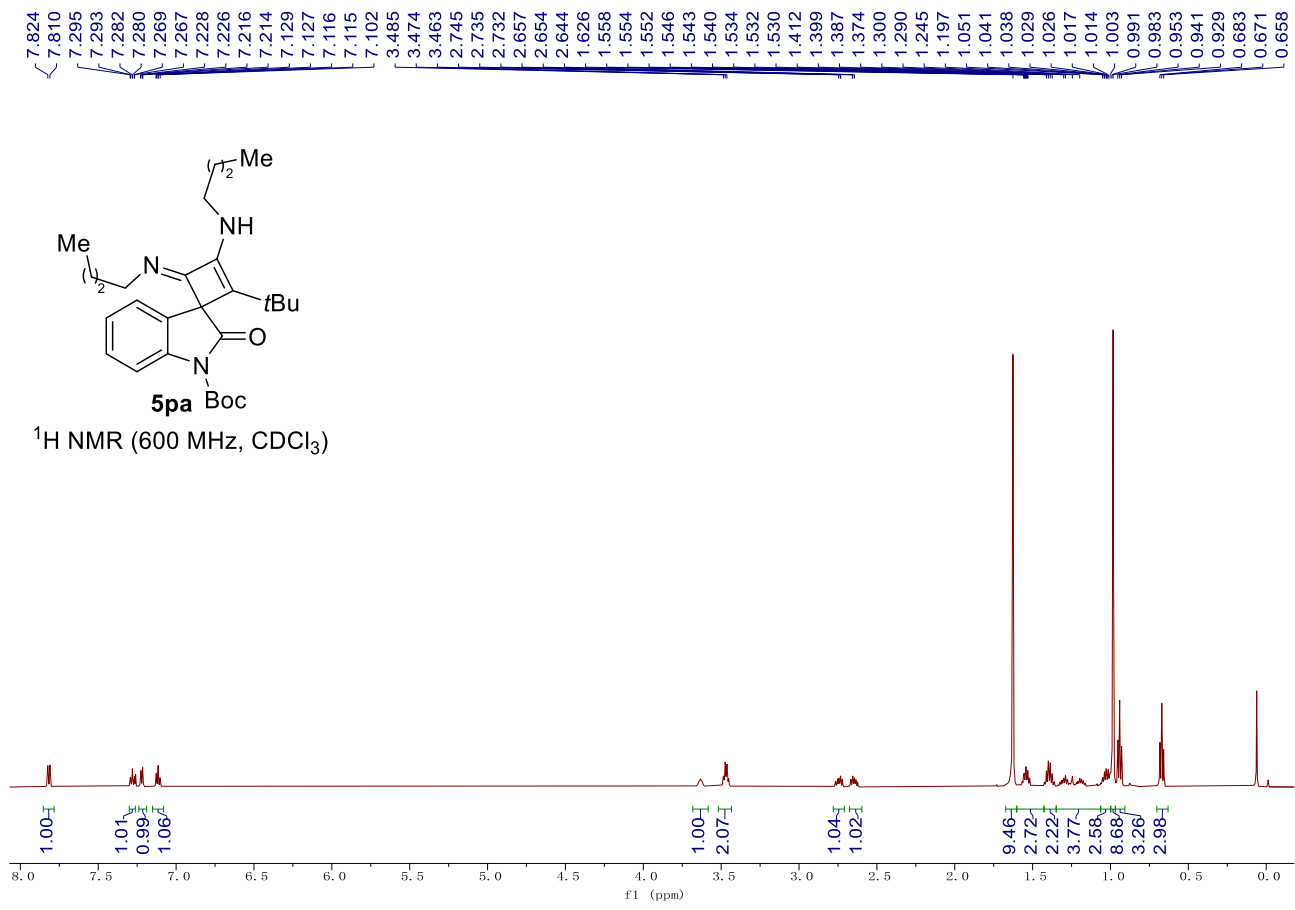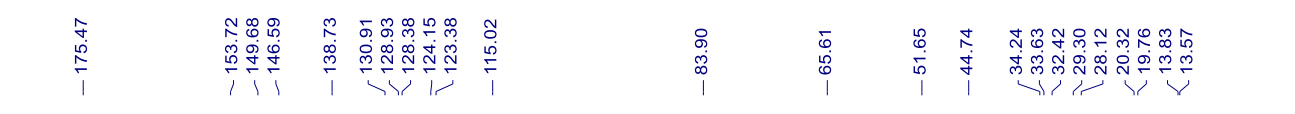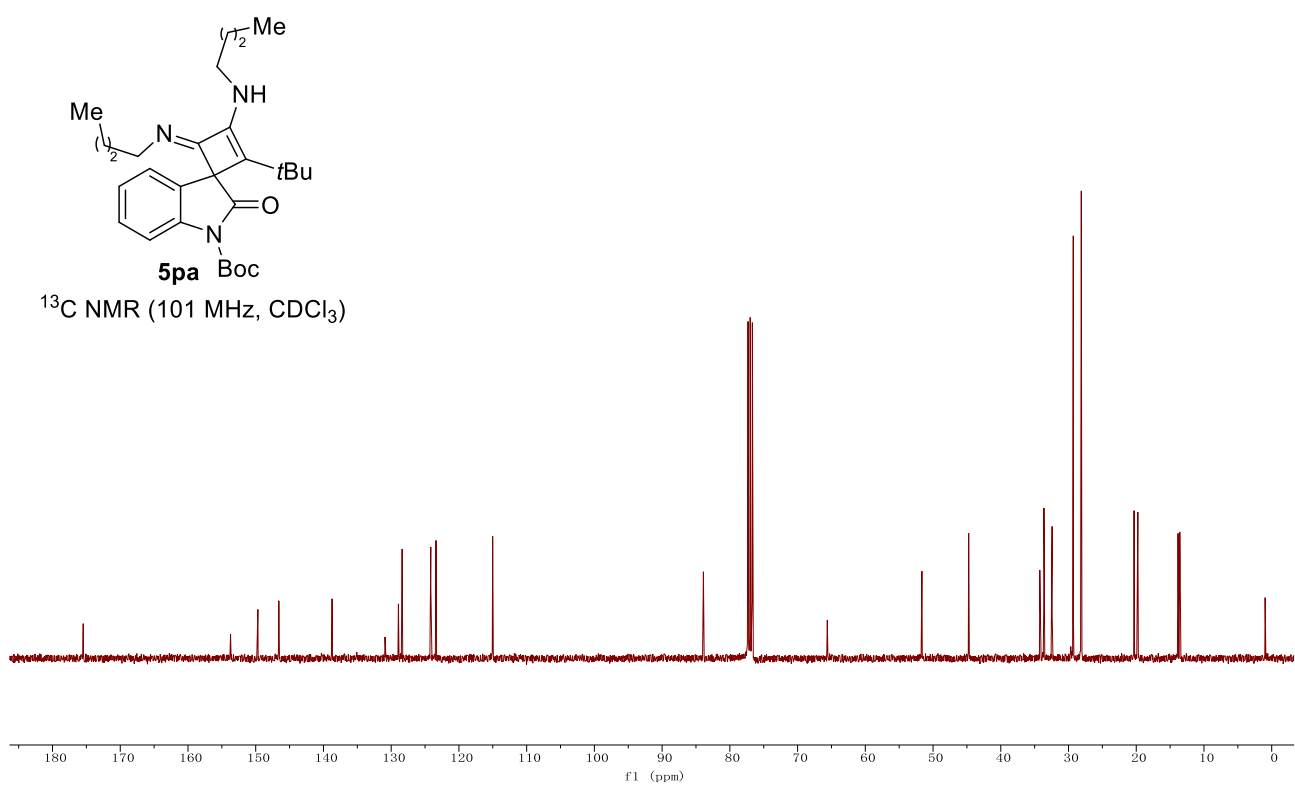

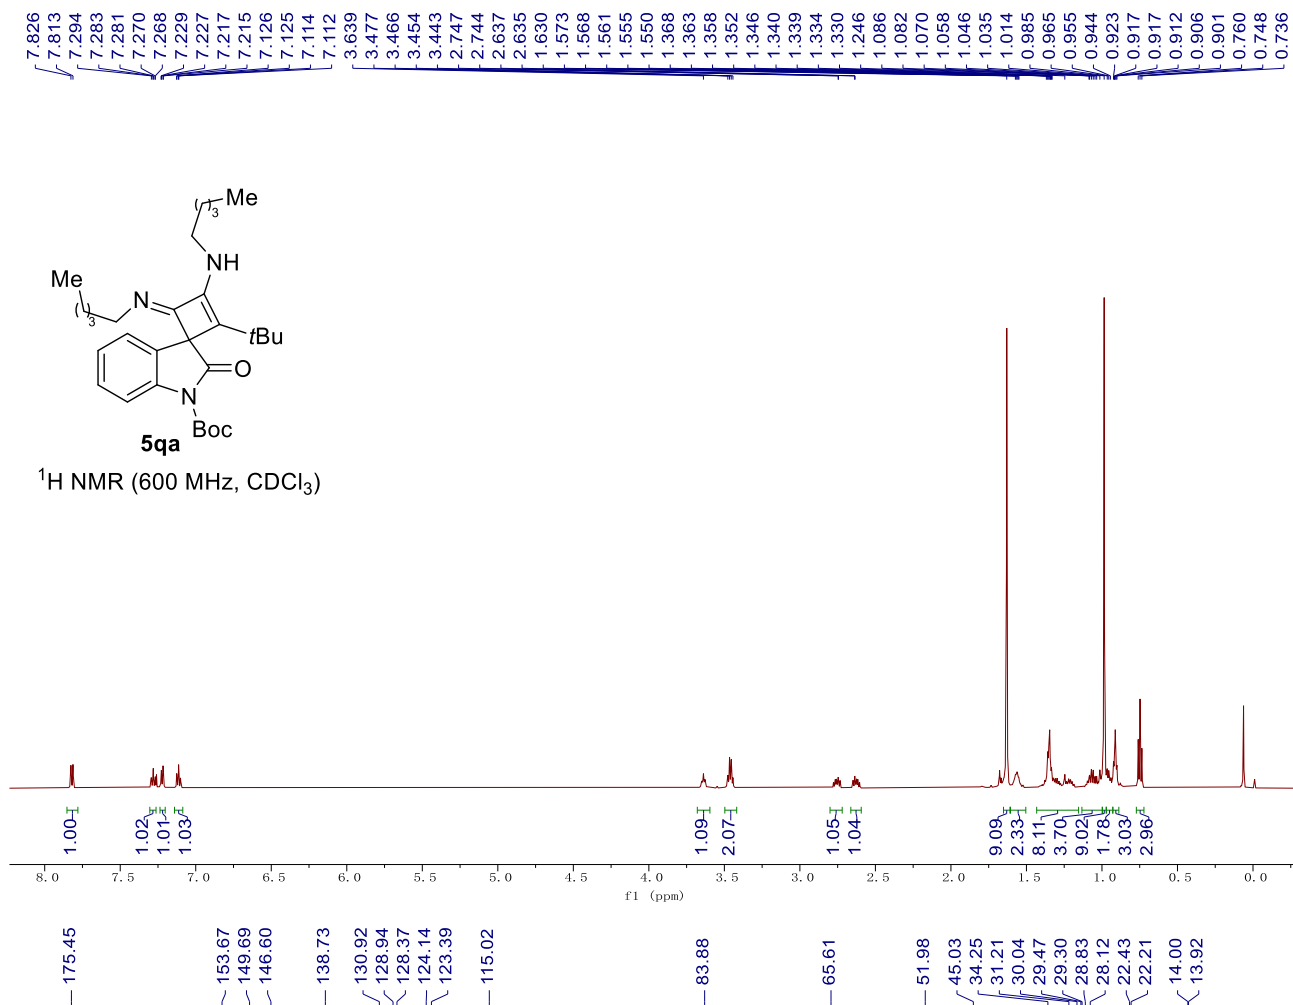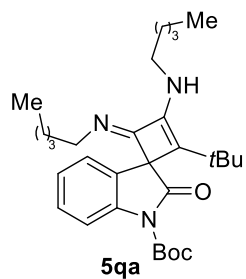

<sup>1</sup>H NMR (600 MHz, CDCl<sub>3</sub>)

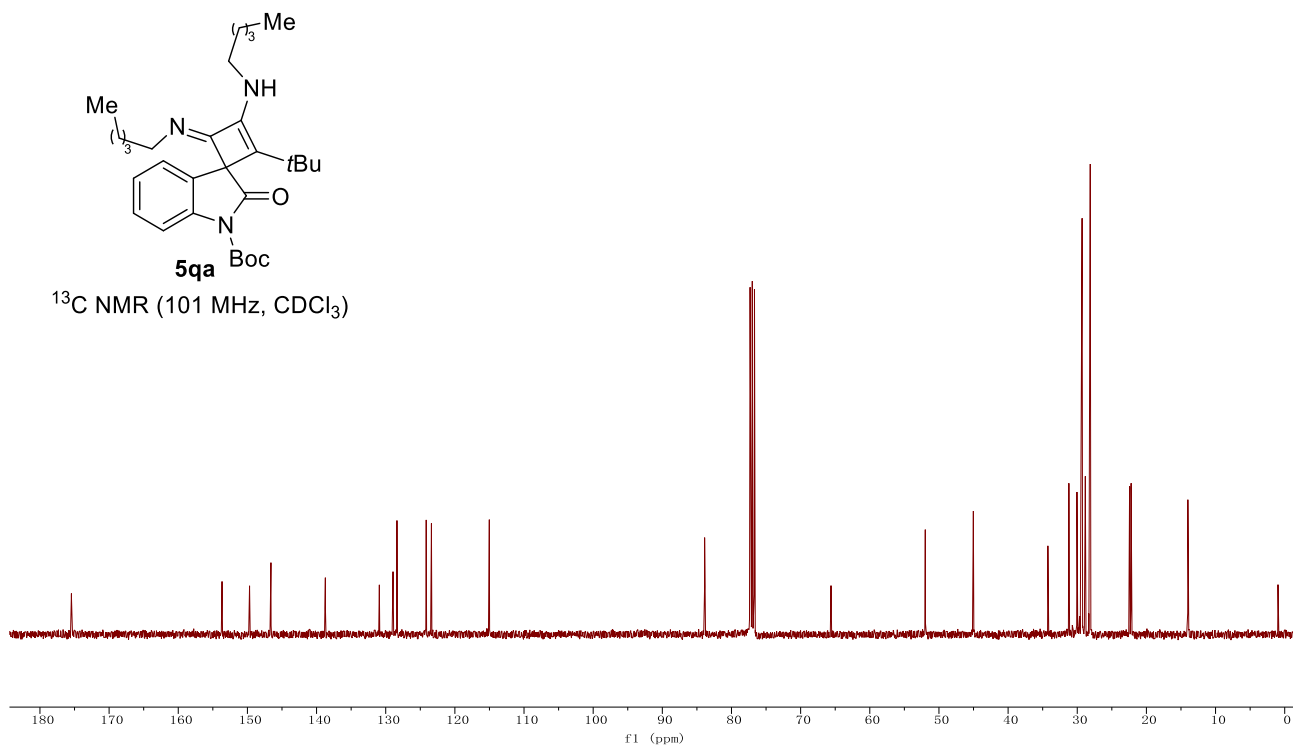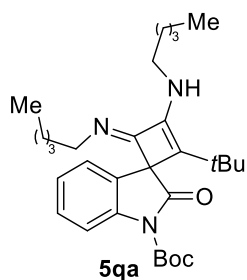

<sup>13</sup>C NMR (101 MHz, CDCl<sub>3</sub>)



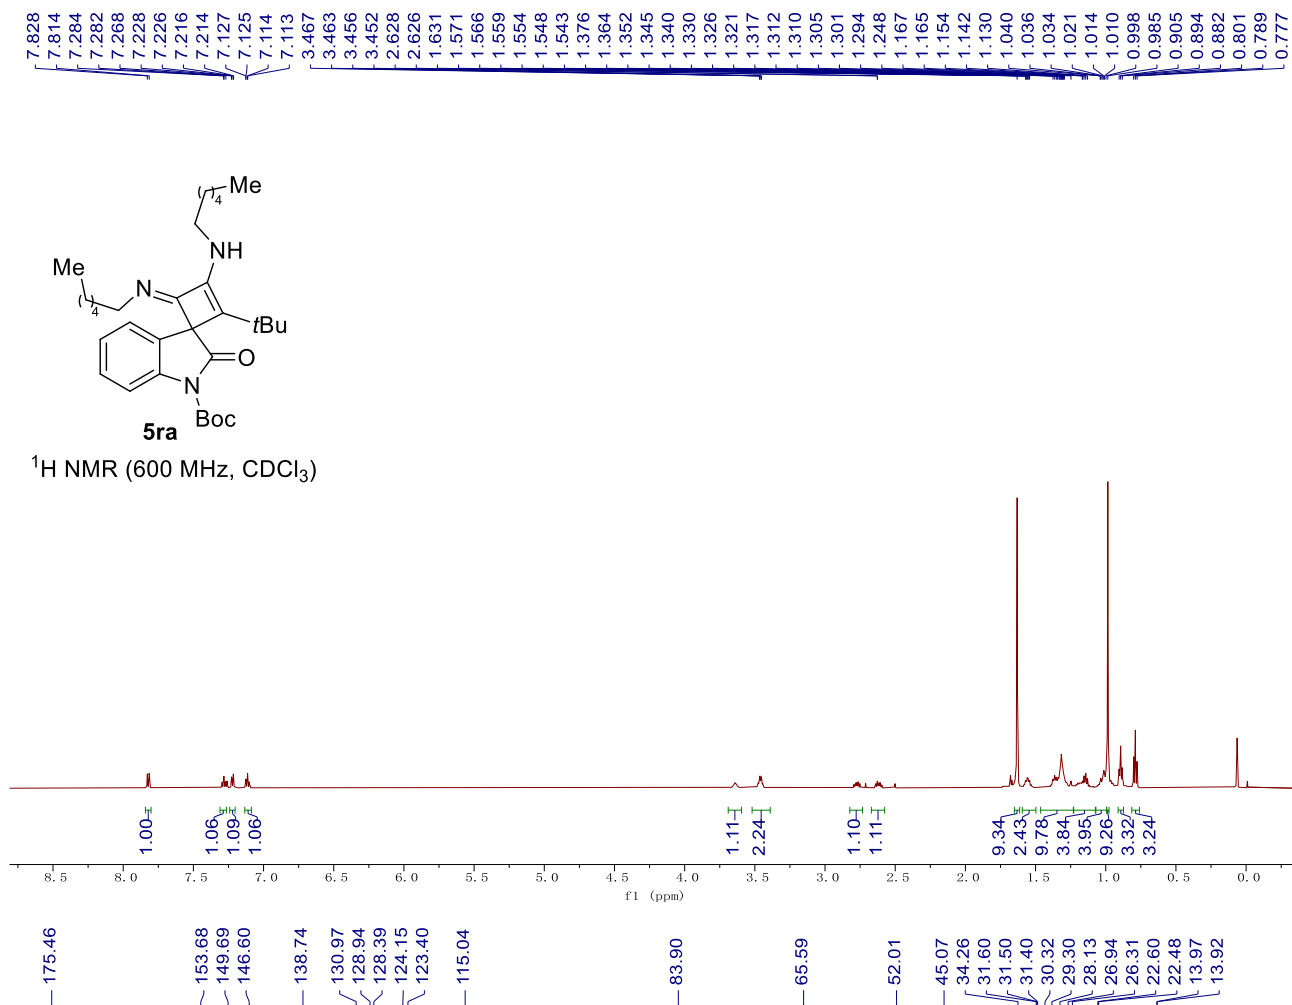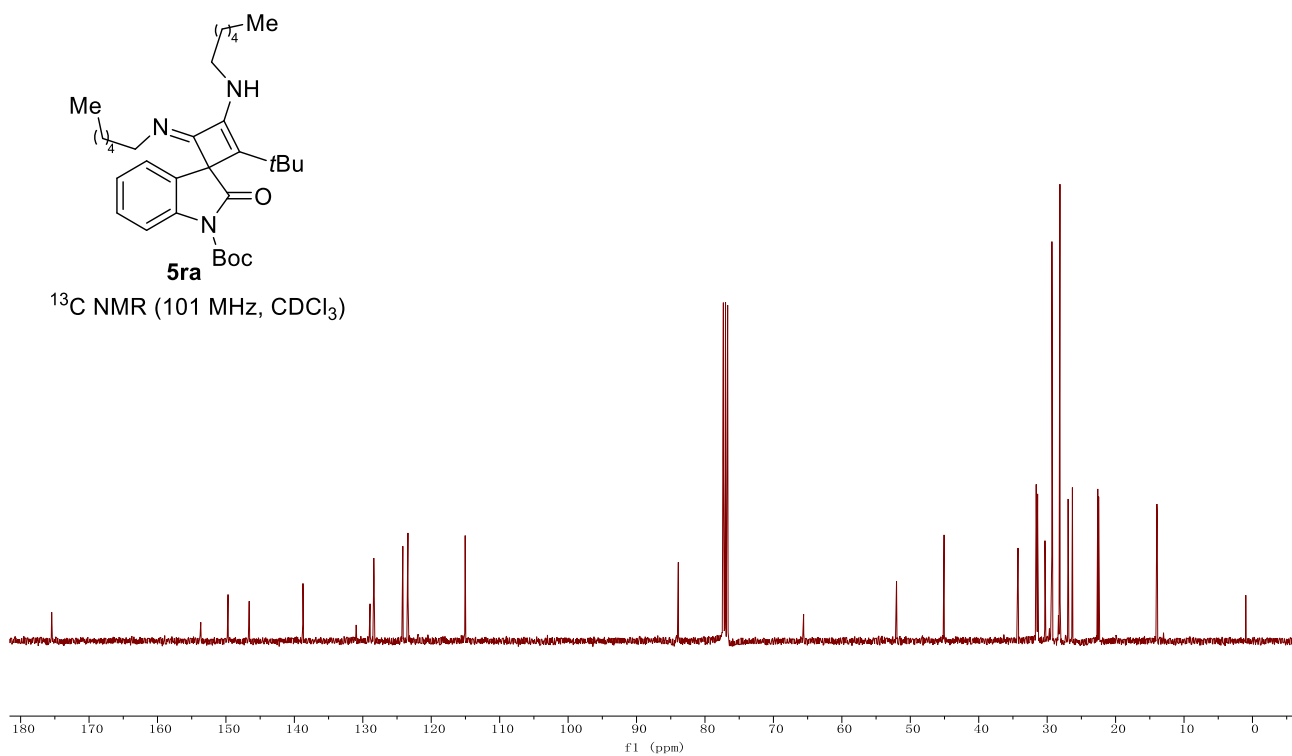

7.847  
7.834  
7.380  
7.379  
7.377  
7.375  
7.335  
7.333  
7.323  
7.321  
7.319  
7.309  
7.307  
7.227  
7.226  
7.224  
7.222  
7.190  
7.187  
7.177  
7.175  
7.149  
7.147  
7.136  
7.135  
7.124  
7.122  
6.341  
6.338  
6.335  
6.332  
6.240  
6.238  
6.235  
6.233  
6.190  
6.187  
6.185  
6.182  
5.803  
5.801  
5.798  
5.796  
4.775  
4.775  
4.762  
4.750  
4.580  
4.570  
4.554  
4.545  
4.031  
4.018  
4.008  
3.993  
3.806  
3.781  
1.640  
0.976

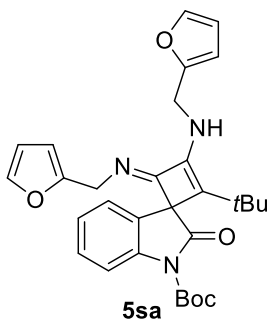

$^1\text{H NMR}$  (600 MHz,  $\text{CDCl}_3$ )

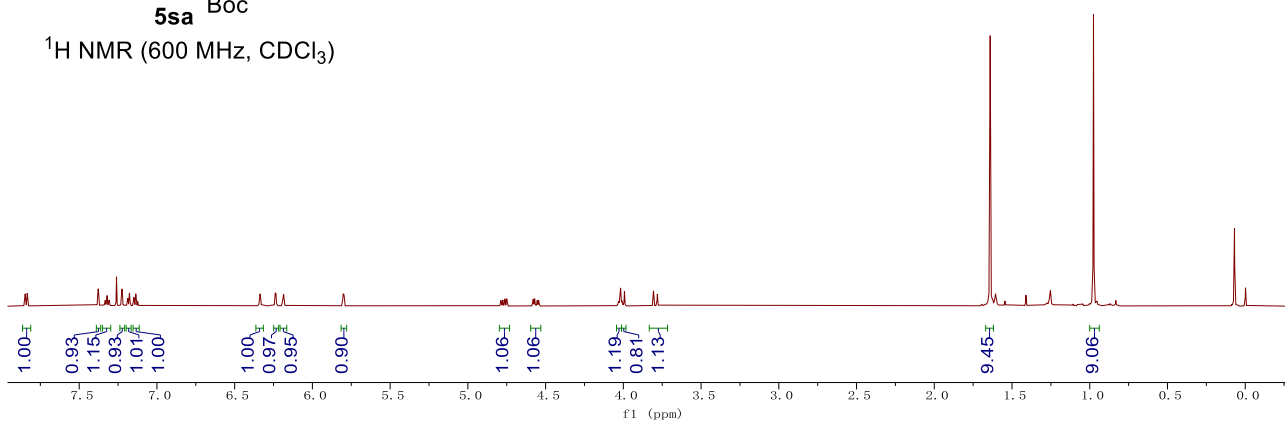

174.83  
155.55  
153.57  
152.23  
149.47  
145.90  
141.87  
141.51  
138.70  
135.08  
128.87  
127.83  
124.41  
123.75  
115.23  
110.35  
110.10  
107.01  
106.64  
84.29  
65.40  
48.47  
41.98  
34.51  
29.11  
28.11

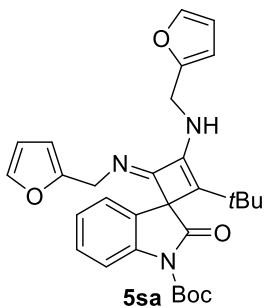

$^{13}\text{C NMR}$  (101 MHz,  $\text{CDCl}_3$ )

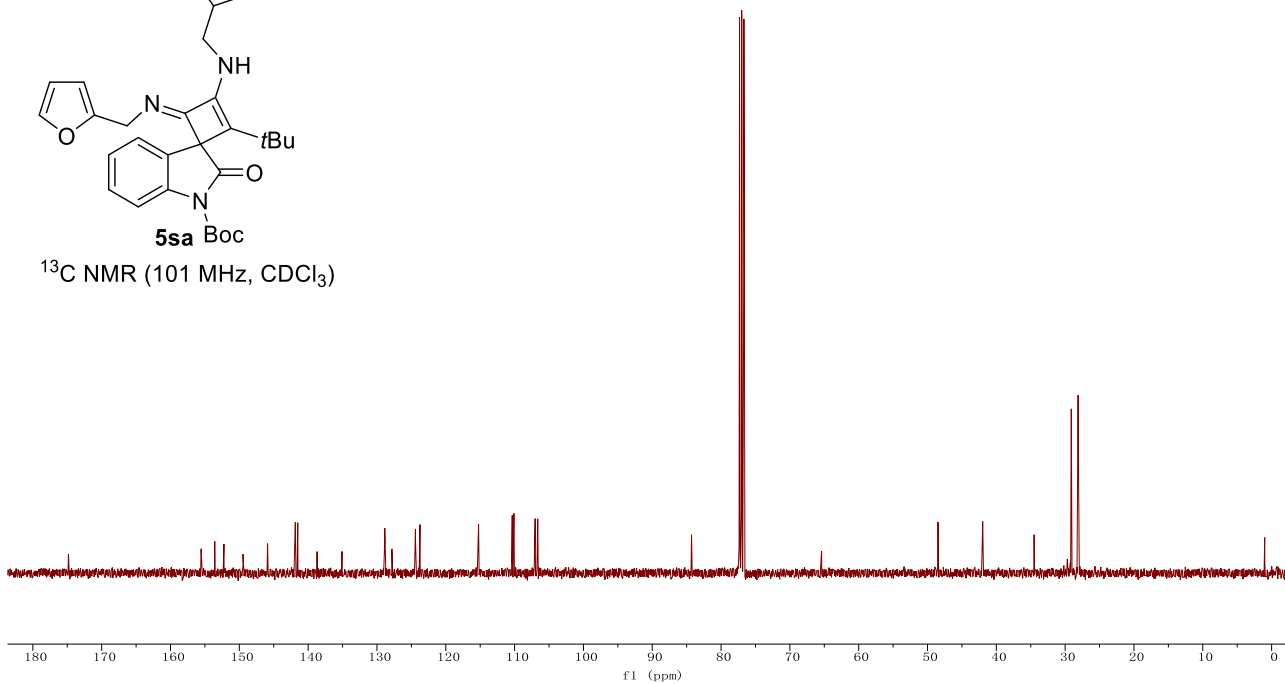

8.424  
8.160  
7.882  
7.862  
7.329  
7.325  
7.315  
7.312  
7.309  
7.305  
7.295  
7.292  
7.289  
7.247  
7.243  
7.175  
7.157  
7.153  
7.150  
7.137  
7.131  
7.123  
7.116  
7.112  
7.103  
7.100  
7.012  
7.006  
6.974  
6.972  
6.954  
6.675  
6.672  
6.669  
6.666  
6.659  
6.656  
6.640  
6.638  
6.359  
6.356  
6.353  
6.351  
6.348  
6.345  
6.343  
5.039  
5.033  
5.024  
5.018  
4.426  
4.389  
4.152  
4.115  
4.043  
1.649  
0.977

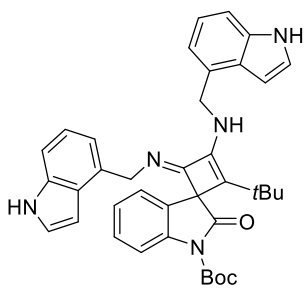

<sup>1</sup>H NMR (400 MHz, CDCl<sub>3</sub>)

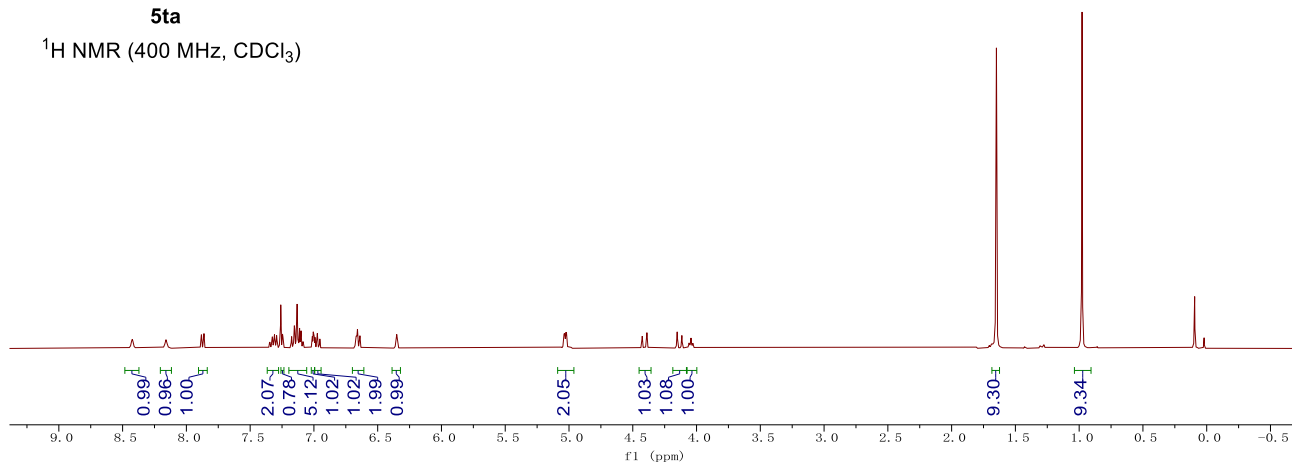

175.87  
154.28  
149.64  
146.69  
138.76  
135.99  
135.67  
131.95  
131.91  
131.00  
128.68  
128.66  
126.64  
126.59  
124.48  
124.39  
123.82  
123.70  
121.81  
121.75  
118.79  
118.72  
115.23  
110.51  
109.81  
101.10  
100.91  
84.27  
65.86  
53.79  
53.46  
47.69  
34.46  
29.35  
28.17

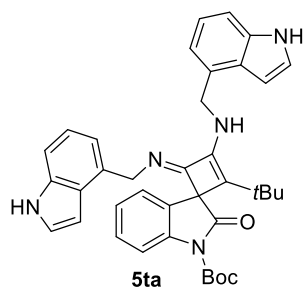

<sup>13</sup>C NMR (101 MHz, CDCl<sub>3</sub>)

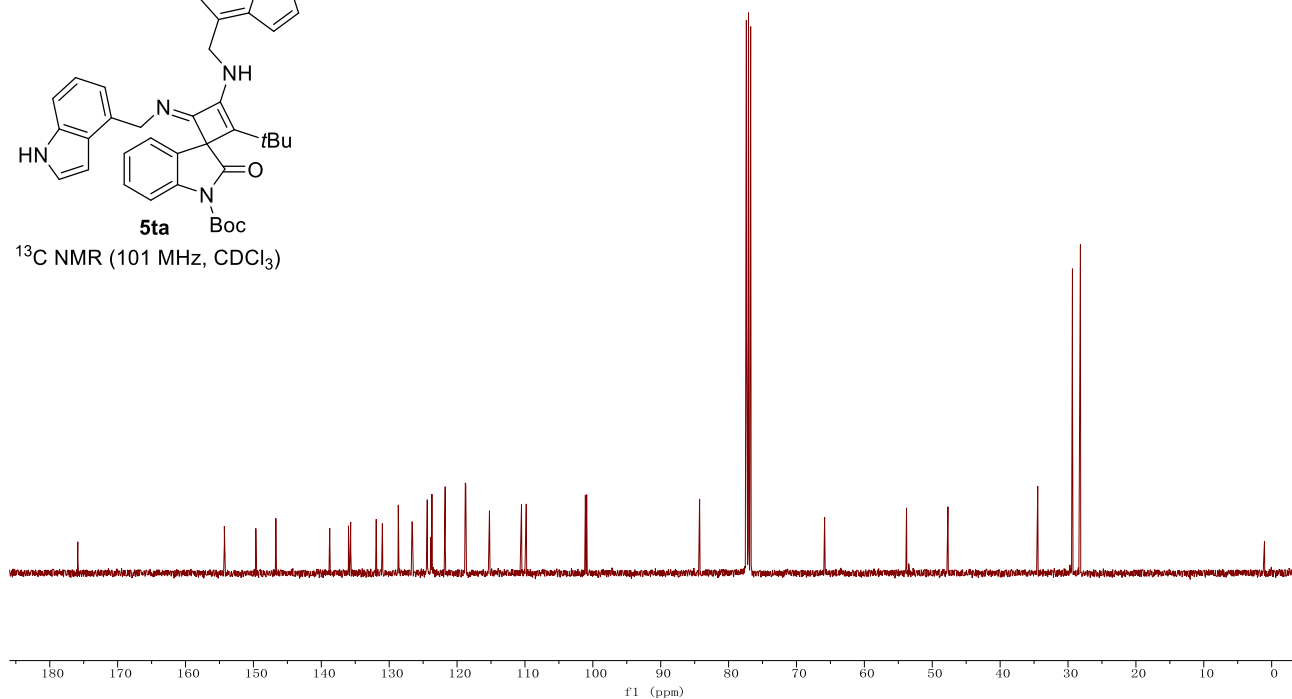

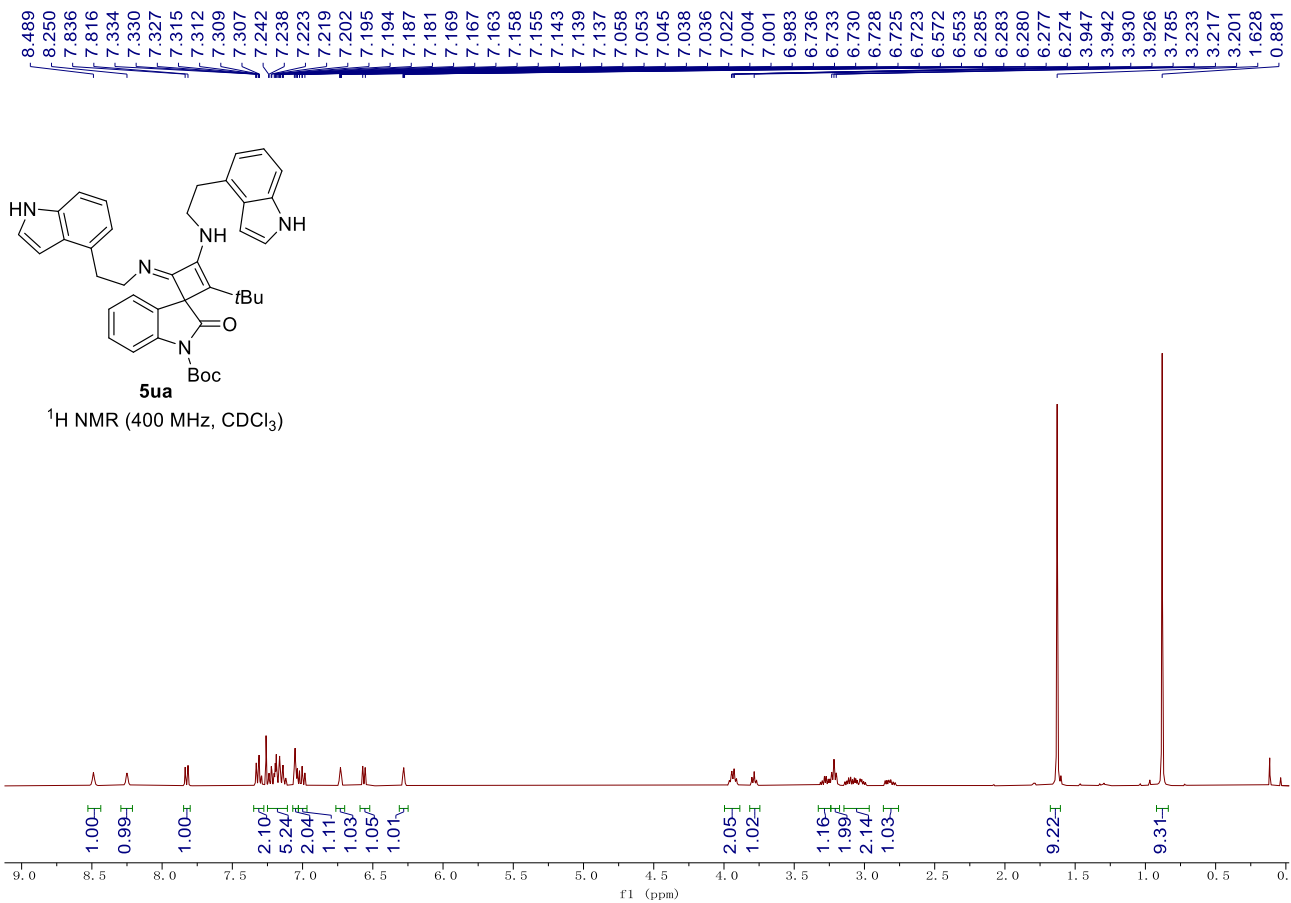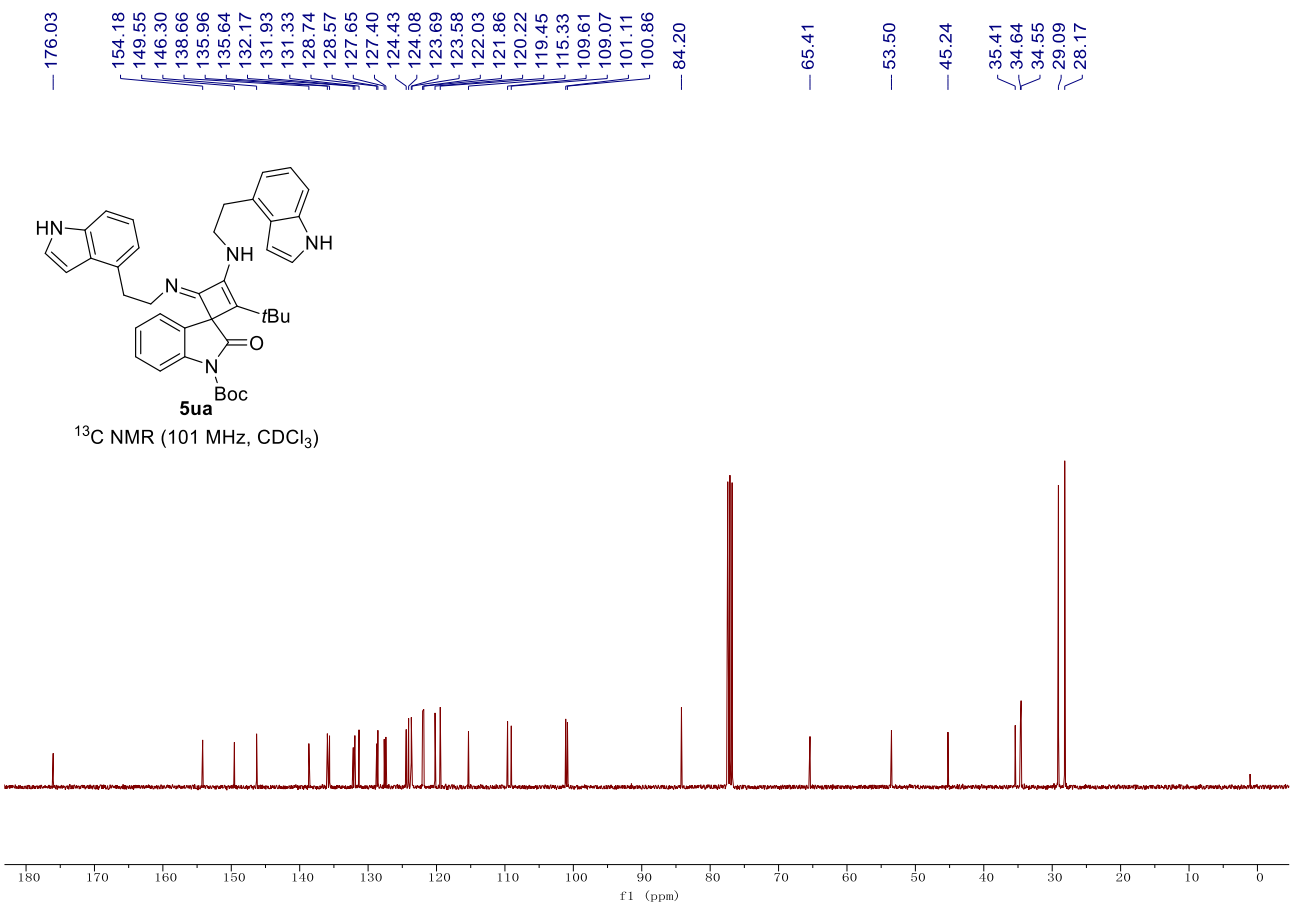

7.453  
7.434  
7.415  
7.333  
7.313  
7.292  
7.272  
7.260  
7.237  
7.219  
7.206  
7.192  
7.187  
7.172  
7.160  
7.150  
7.145  
7.128

4.347  
4.329  
4.311

3.730  
3.644  
3.626  
3.606

3.069  
3.052  
3.034  
2.776  
2.757  
2.738

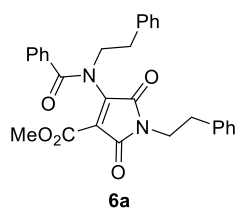

$^1\text{H NMR}$  (400 MHz,  $\text{CDCl}_3$ )

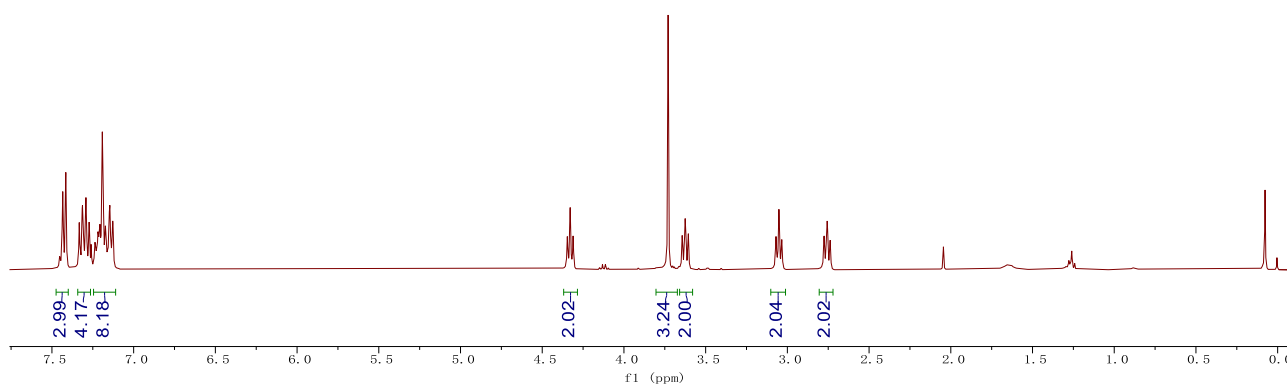

171.30  
165.24  
164.97  
160.18  
149.20  
138.07  
137.43  
134.27  
132.04  
129.36  
128.71  
128.62  
128.56  
128.38  
128.35  
126.86  
126.80  
114.68

52.32  
51.17

39.42  
35.49  
34.10

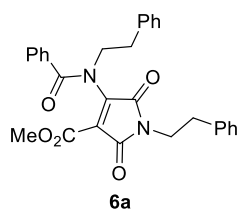

$^{13}\text{C NMR}$  (101 MHz,  $\text{CDCl}_3$ )

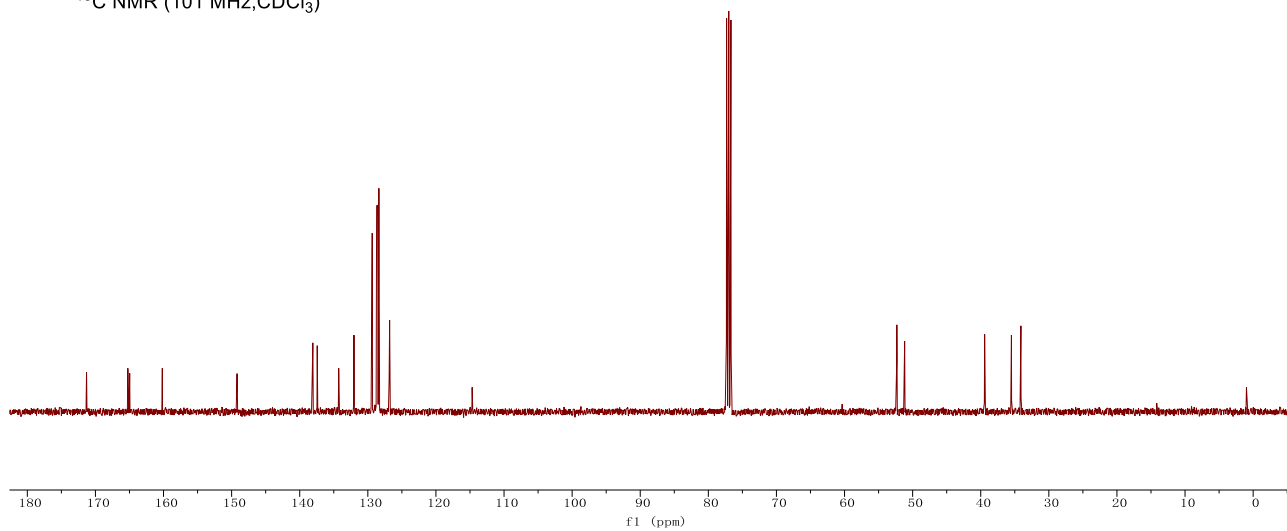

7.321  
7.308  
7.294  
7.282  
7.235  
7.224  
7.219  
7.205  
7.194  
7.189  
7.178  
7.166  
7.163  
7.153  
7.142  
7.114  
7.101

4.331  
4.319  
4.307

3.725  
3.644  
3.631  
3.619

3.059  
3.047  
3.036

2.782  
2.769  
2.757

— 2.342

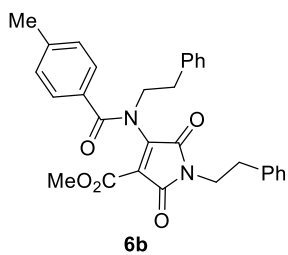

<sup>1</sup>H NMR (600 MHz, CDCl<sub>3</sub>)

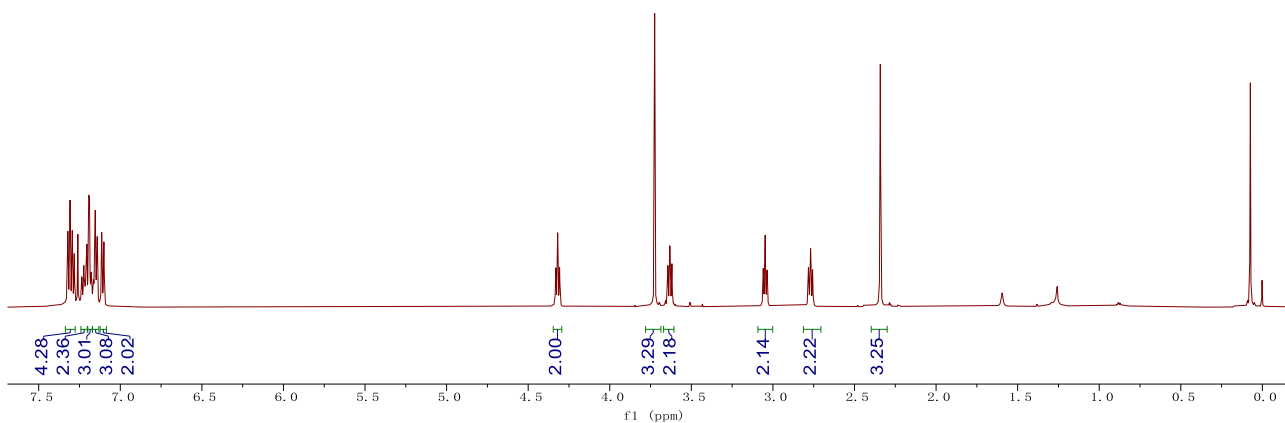

171.43  
165.31  
165.12  
160.18

149.44  
142.80  
138.15  
137.50  
131.38  
129.38  
129.07  
128.73  
128.71  
128.57  
128.37  
126.85  
126.80  
114.19

52.27  
51.15

39.44  
35.56  
34.15

— 21.53

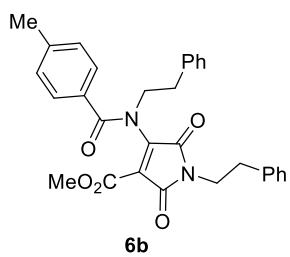

<sup>13</sup>C NMR (151 MHz, CDCl<sub>3</sub>)

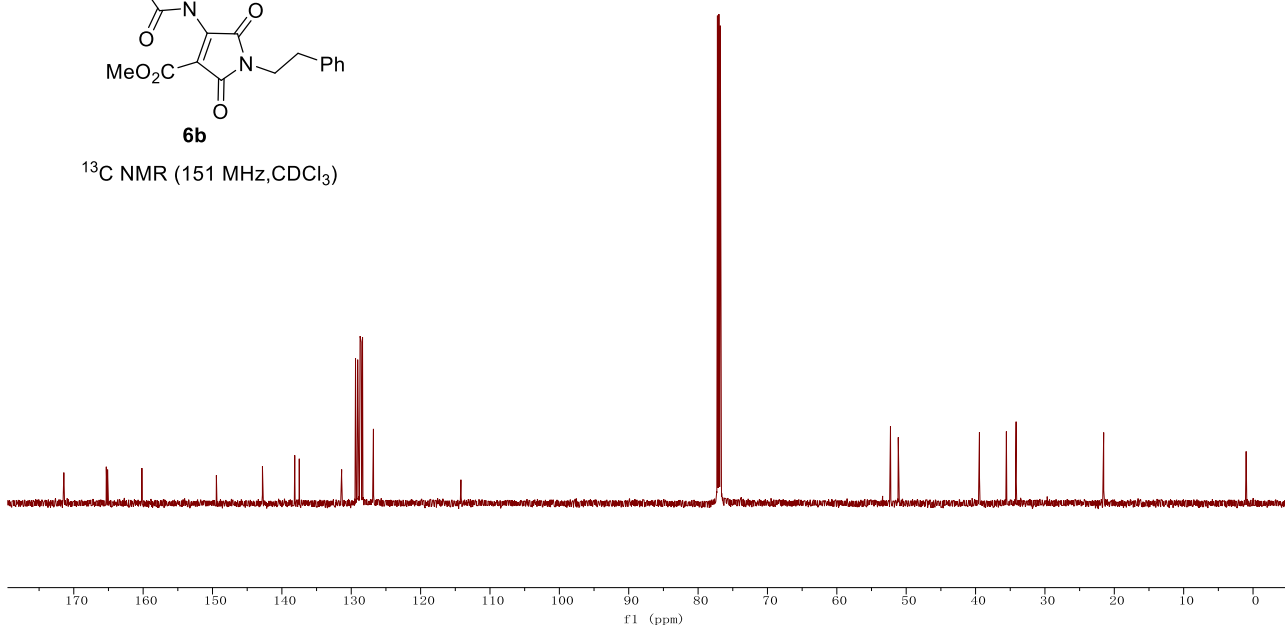

7.499  
7.482  
7.478  
7.451  
7.447  
7.444  
7.434  
7.428  
7.413  
7.410  
7.406  
7.346  
7.327  
7.313  
7.309  
7.306

4.034  
4.016  
3.996  
3.805

3.479  
3.476  
3.461  
3.458  
3.444  
3.440  
1.671  
1.653  
1.633  
1.478  
1.460  
1.422  
1.405  
1.387  
1.367  
1.348  
1.330  
1.312  
1.149  
1.129  
1.111  
1.092  
0.943  
0.925  
0.906  
0.869  
0.851  
0.832

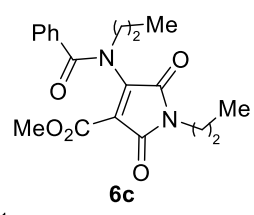

<sup>1</sup>H NMR (400 MHz, CDCl<sub>3</sub>)

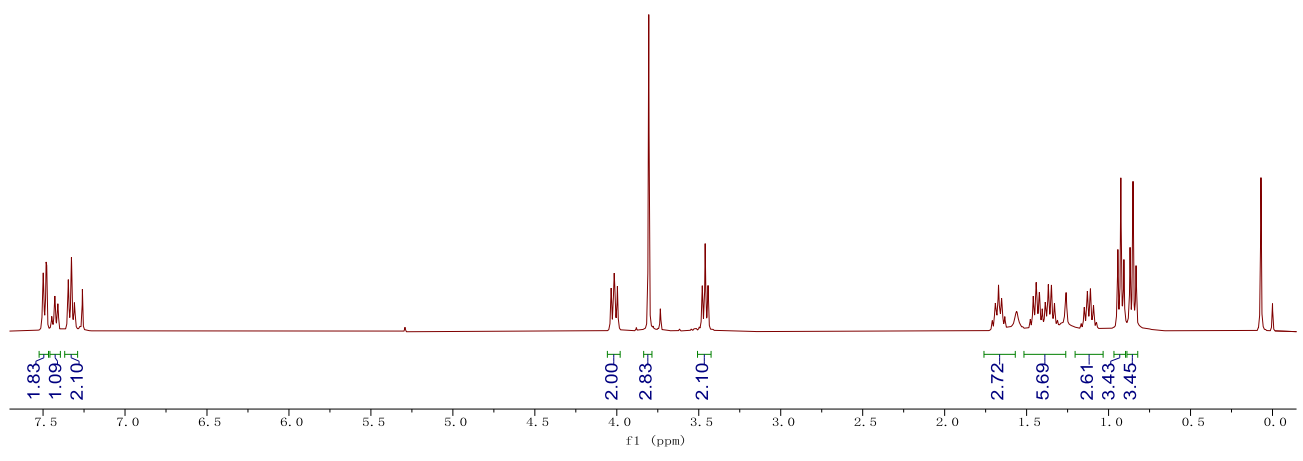

171.03  
165.64  
165.56  
160.39

149.28

135.28  
131.84  
128.56  
128.43

115.59

52.48  
49.66

38.18

30.80  
30.11

20.02  
19.62  
13.62  
13.42

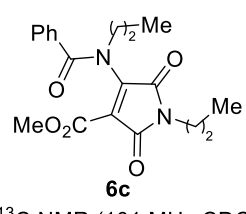

<sup>13</sup>C NMR (101 MHz, CDCl<sub>3</sub>)

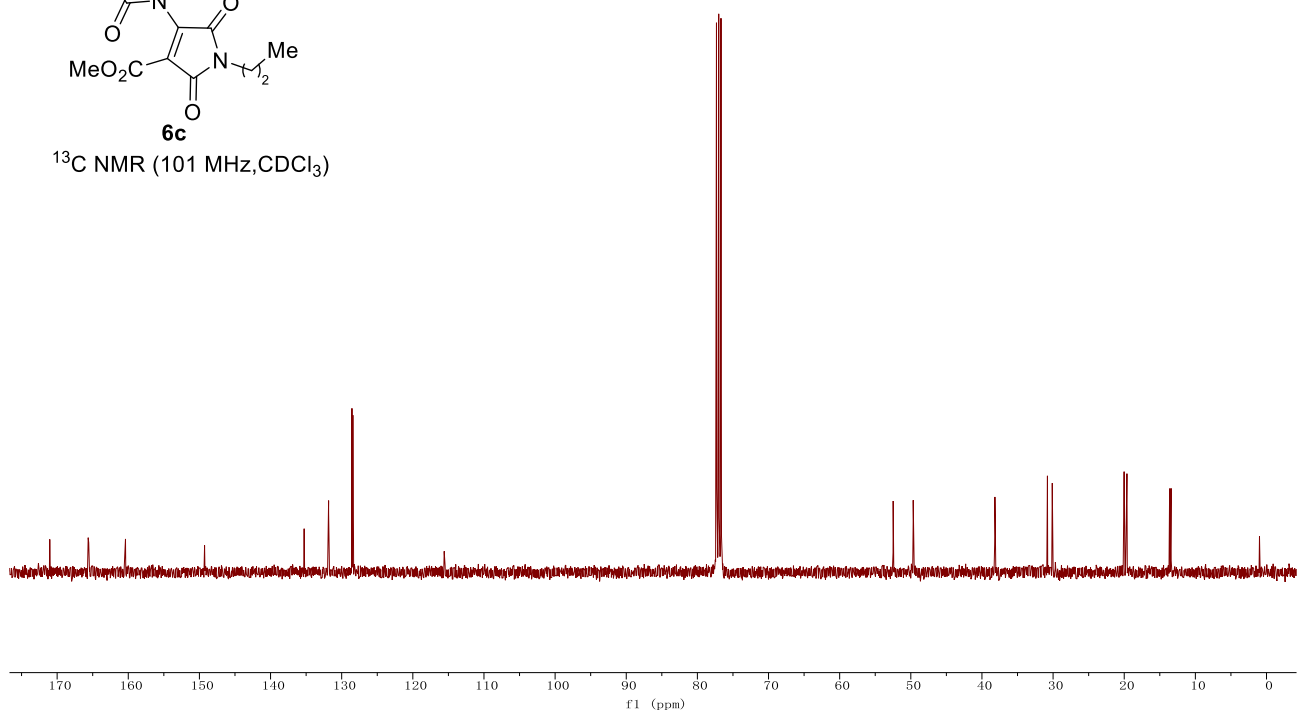

7.501  
7.489  
7.484  
7.480  
7.447  
7.434  
7.428  
7.413  
7.410  
7.348  
7.328  
7.310

4.027  
4.008  
3.989  
3.802  
3.473  
3.455  
3.437  
1.729  
1.711  
1.691  
1.673  
1.654  
1.501  
1.484  
1.465  
1.445  
1.427  
1.380  
1.370  
1.334  
1.324  
1.315  
1.305  
1.293  
1.286  
1.275  
1.259  
1.238  
1.221  
1.133  
1.120  
1.114  
1.103  
1.096  
1.081  
1.075  
1.059  
0.903  
0.886  
0.872  
0.854  
0.835

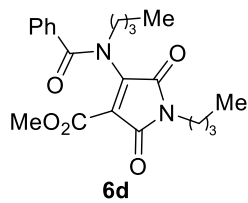

<sup>1</sup>H NMR (400 MHz, CDCl<sub>3</sub>)

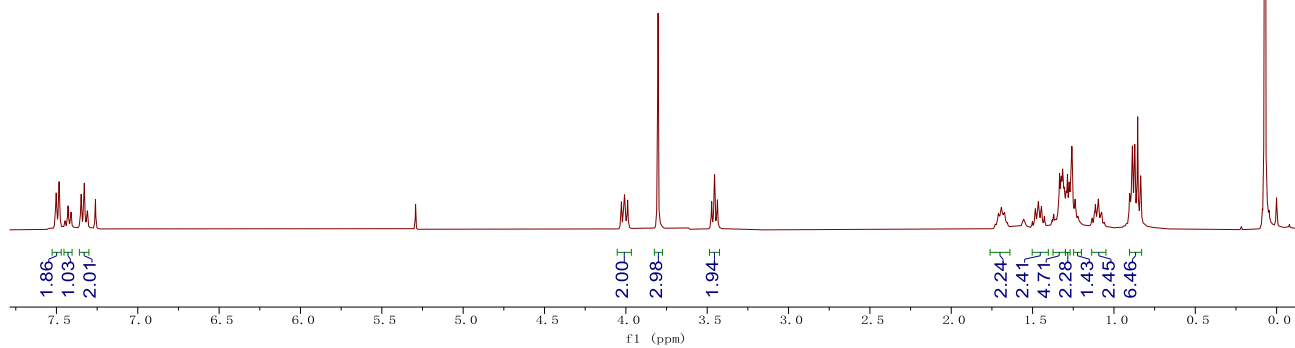

171.03  
165.64  
165.56  
160.38  
149.27  
135.24  
131.88  
128.56  
128.43  
115.59  
52.46  
49.91  
38.45  
28.90  
28.54  
28.39  
27.74  
22.23  
22.07  
13.87  
13.80

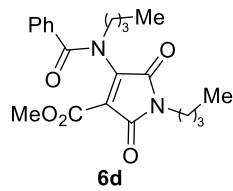

<sup>13</sup>C NMR (101 MHz, CDCl<sub>3</sub>)

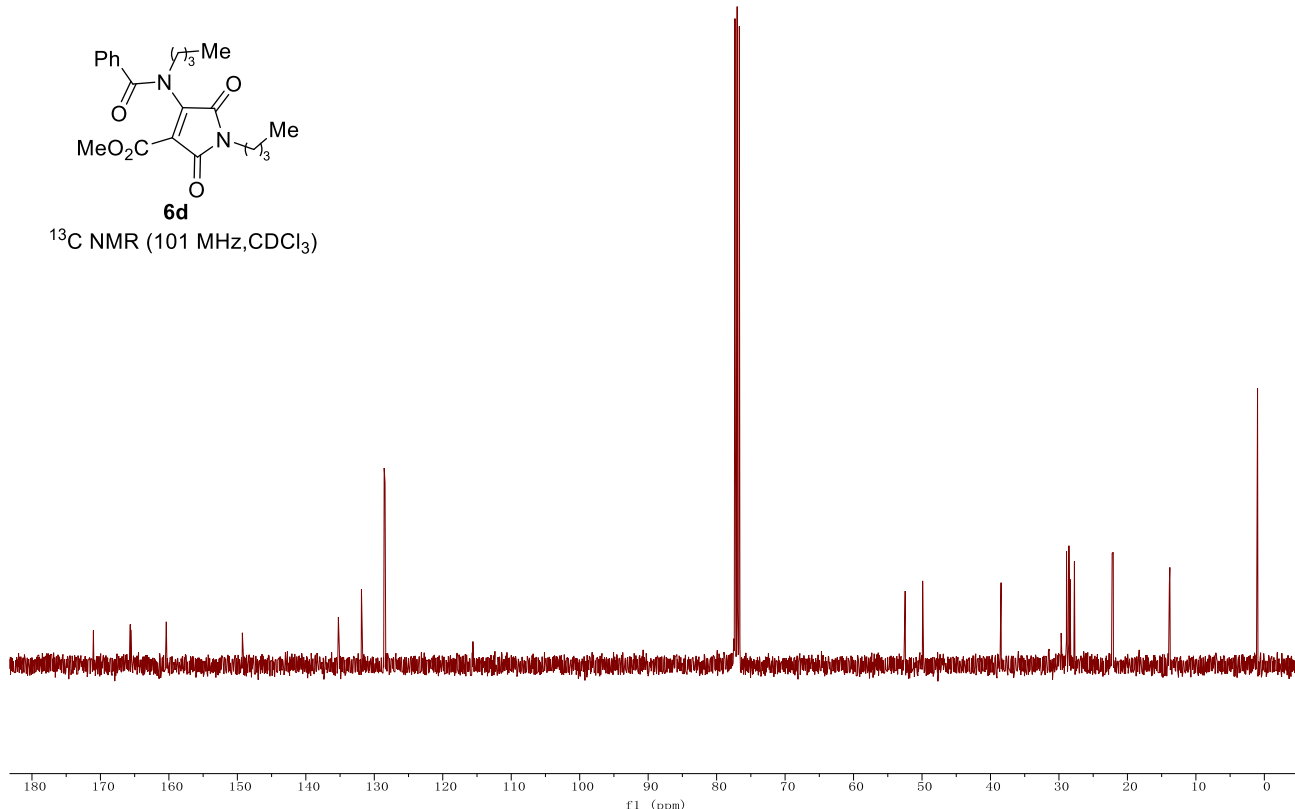



7.500  
7.488  
7.483  
7.478  
7.450  
7.446  
7.442  
7.433  
7.428  
7.423  
7.420  
7.413  
7.409  
7.406  
7.347  
7.343  
7.328  
7.314  
7.309  
4.029  
4.010  
3.991  
3.800  
3.472  
3.455  
3.437  
1.721  
1.704  
1.685  
1.671  
1.666  
1.647  
1.478  
1.459  
1.440  
1.363  
1.346  
1.325  
1.299  
1.294  
1.290  
1.284  
1.261  
1.247  
1.240  
1.230  
1.223  
1.218  
1.211  
1.203  
1.186  
1.159  
1.143  
1.122  
1.104  
0.889  
0.872  
0.855

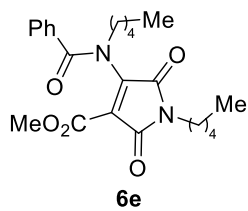

$^1\text{H NMR}$  (400 MHz,  $\text{CDCl}_3$ )

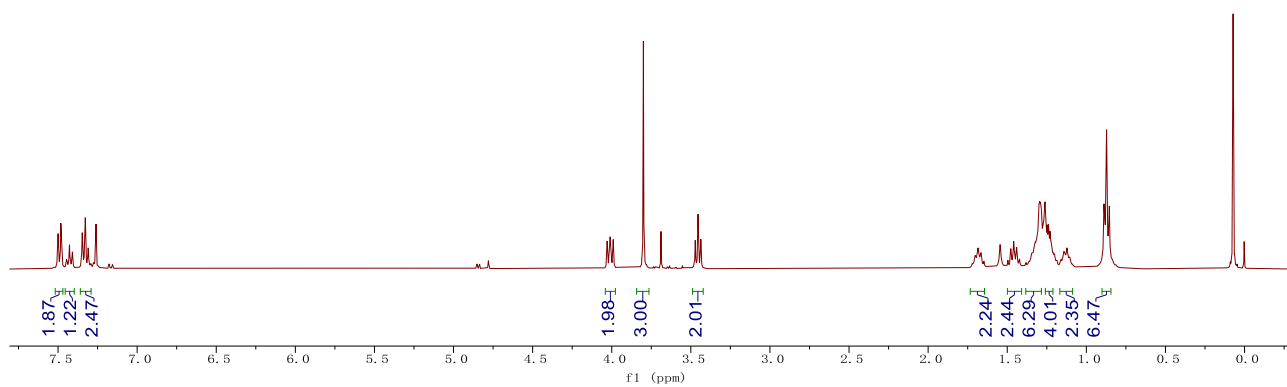

171.03  
165.65  
165.56  
160.38  
149.26  
135.23  
131.87  
128.56  
128.43  
115.64  
52.45  
49.93  
38.50  
31.33  
31.19  
28.70  
28.04  
26.41  
26.11  
22.46  
22.40  
13.92  
13.89

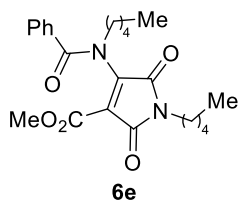

$^{13}\text{C NMR}$  (101 MHz,  $\text{CDCl}_3$ )

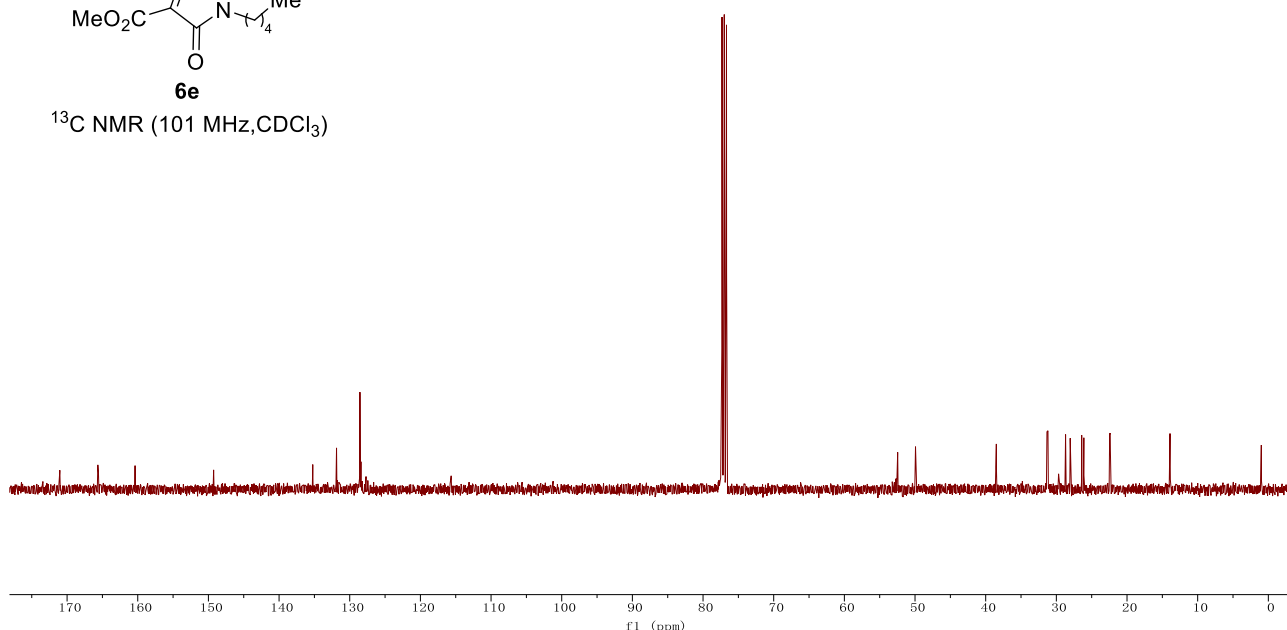

7.447  
7.426  
7.319  
7.298

4.001  
3.982  
3.963  
3.823  
3.477  
3.460  
3.442

1.698  
1.679  
1.661  
1.643  
1.623  
1.499  
1.481  
1.463  
1.444  
1.426  
1.413  
1.378  
1.369  
1.333  
1.313  
1.285  
1.157  
1.138  
1.118  
1.100  
0.887  
0.873  
0.854

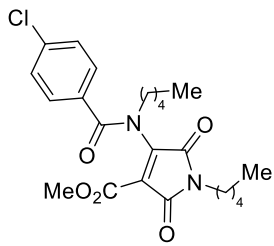

**6f**

<sup>1</sup>H NMR (400 MHz, CDCl<sub>3</sub>)

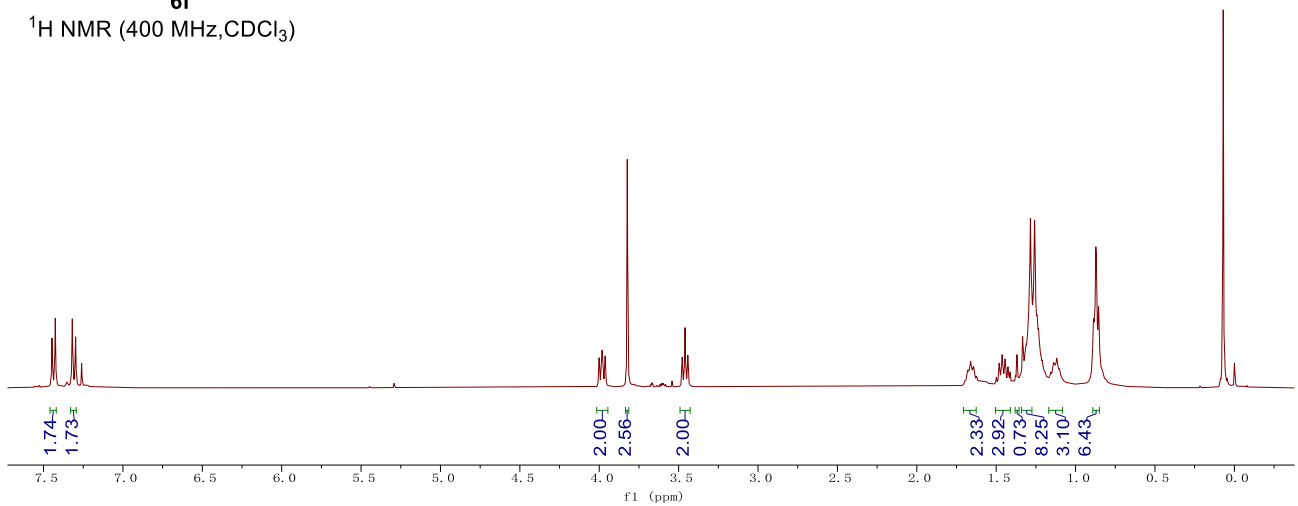

169.98  
165.50  
165.39  
160.38

149.10

138.24  
133.80  
129.88  
128.78

115.68

52.60  
50.08

38.57  
31.30  
31.15  
28.59  
28.03  
26.37  
26.13  
22.44  
22.40  
13.91  
13.88

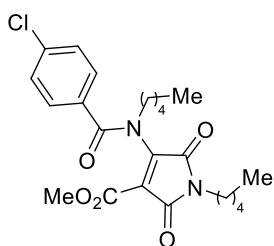

**6f**

<sup>13</sup>C NMR (101 MHz, CDCl<sub>3</sub>)

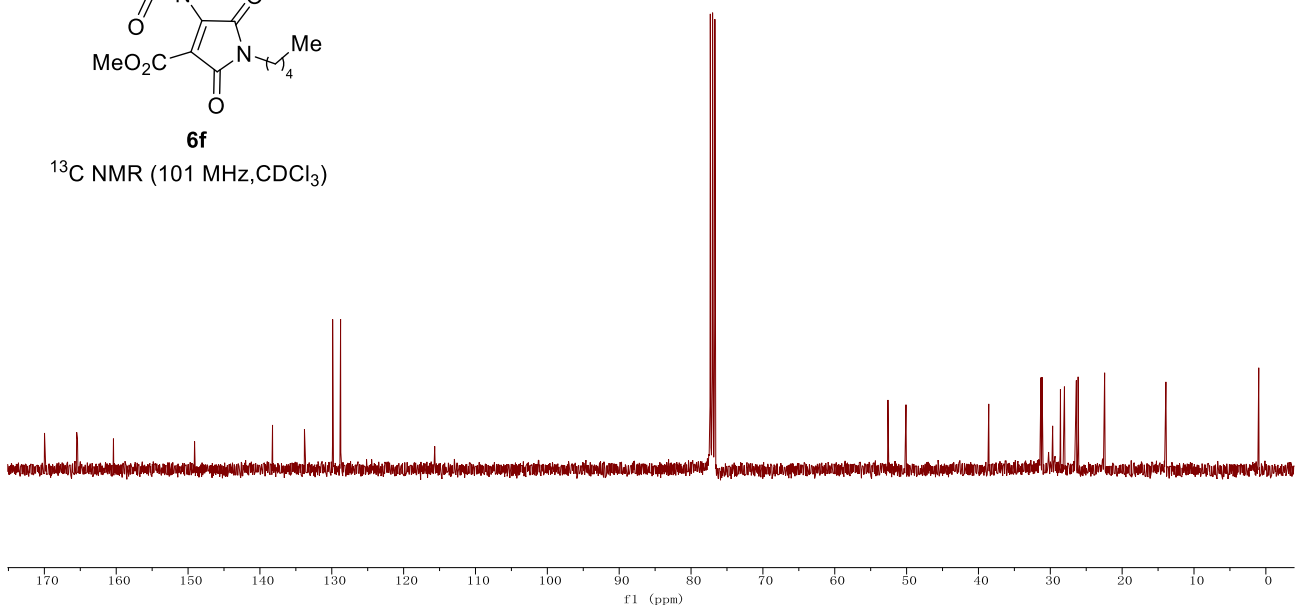

7.504  
7.497  
7.492  
7.480  
7.475  
7.468  
6.855  
6.848  
6.843  
6.832  
6.826  
6.819

4.041  
4.022  
4.003  
3.827  
3.817  
3.502  
3.484  
3.467  
1.739  
1.720  
1.702  
1.684  
1.664  
1.534  
1.516  
1.498  
1.479  
1.461  
1.450  
1.445  
1.403  
1.393  
1.357  
1.309  
1.281  
1.259  
1.249  
1.242  
1.234  
1.227  
1.181  
1.175  
1.161  
1.157  
1.140  
1.137  
0.907  
0.903  
0.892  
0.890  
0.874  
0.851

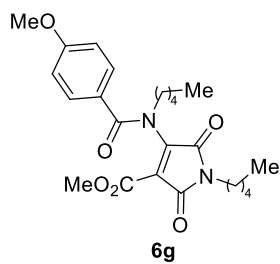

<sup>1</sup>H NMR (400 MHz, CDCl<sub>3</sub>)

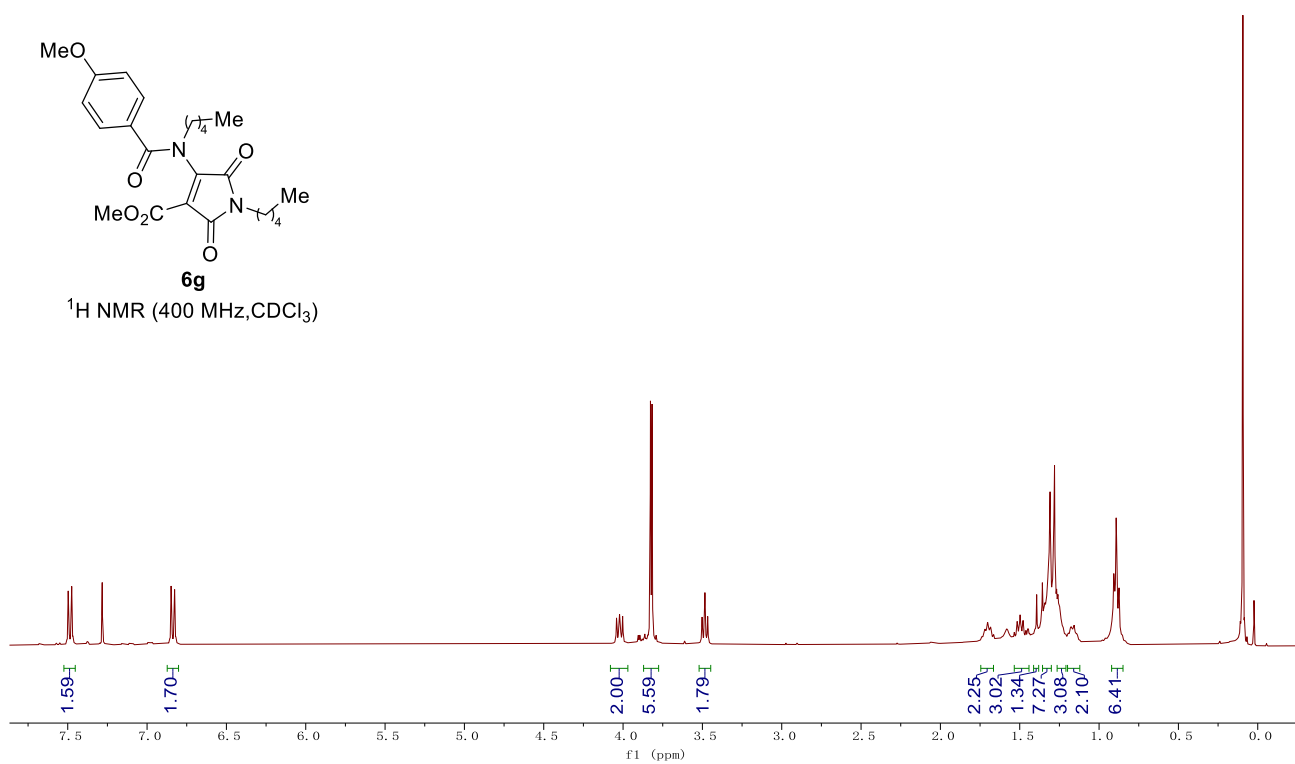

170.80  
165.86  
165.66  
162.63  
160.52  
149.80  
130.68  
127.55  
113.82  
55.35  
52.37  
50.01  
38.46  
31.35  
31.19  
28.71  
28.09  
26.42  
26.15  
22.47  
22.39  
13.92  
13.90

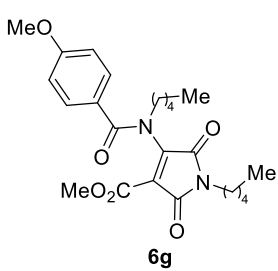

<sup>13</sup>C NMR (101 MHz, CDCl<sub>3</sub>)

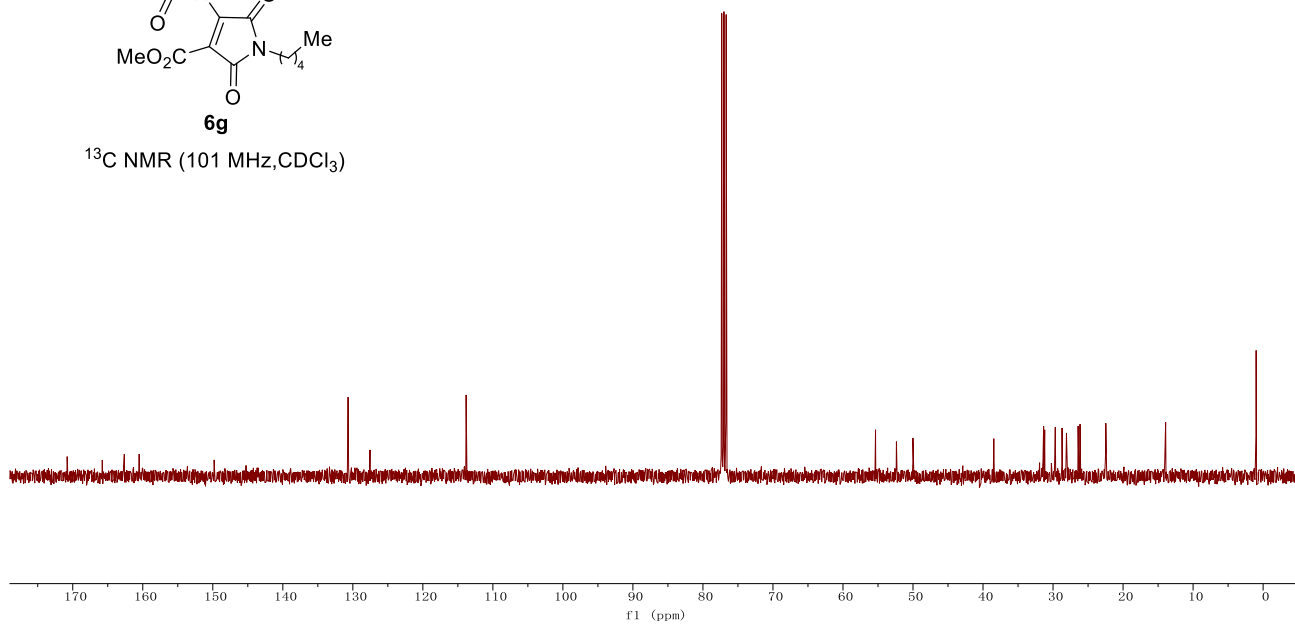

7.392  
7.372  
7.132  
7.112

4.023  
4.003  
3.985  
3.790  
3.479  
3.462  
3.444  
2.338  
1.680  
1.661  
1.486  
1.467  
1.449  
1.415  
1.341  
1.335  
1.320  
1.293  
1.286  
1.281  
1.260  
1.250  
1.242  
1.232  
1.215  
1.208  
1.156  
1.137  
1.121  
0.888  
0.873  
0.870  
0.855

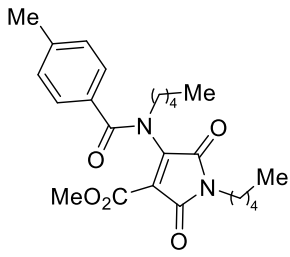

**6h**

<sup>1</sup>H NMR (400 MHz, CDCl<sub>3</sub>)

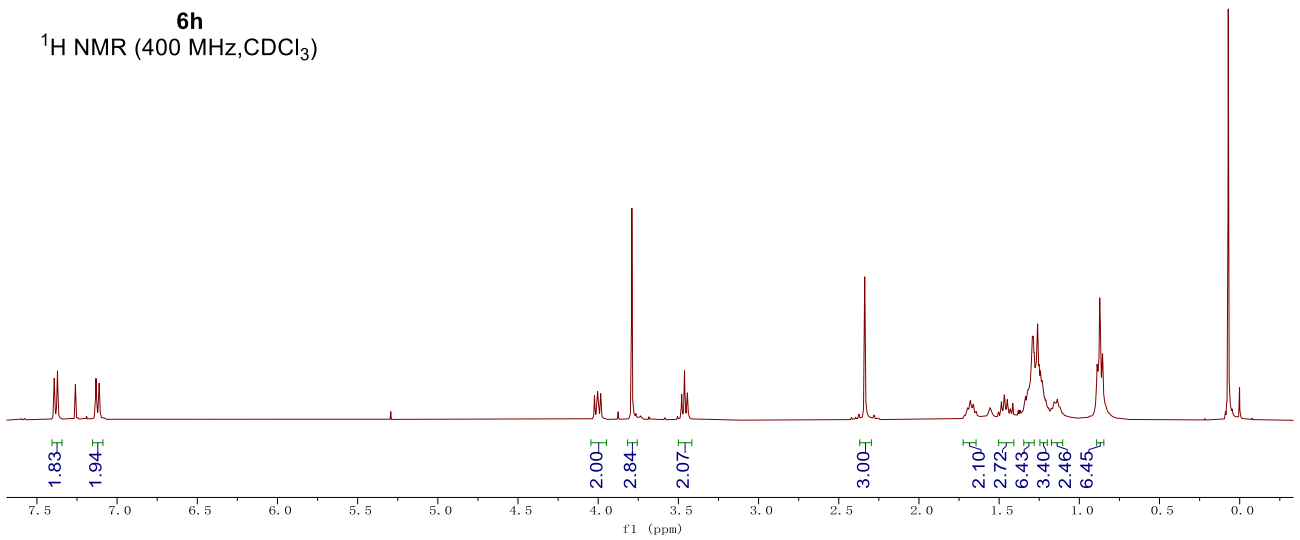

171.13  
165.69  
160.40

149.51  
142.61

132.38  
129.14  
128.64

114.99

52.38  
49.90

38.45  
31.34  
31.21  
28.72  
28.06  
26.42  
26.13  
22.46  
22.40  
21.48  
13.92  
13.90

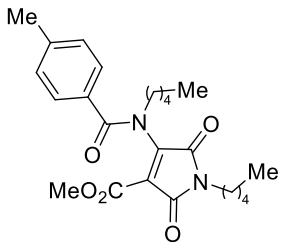

**6h**

<sup>13</sup>C NMR (101 MHz, CDCl<sub>3</sub>)

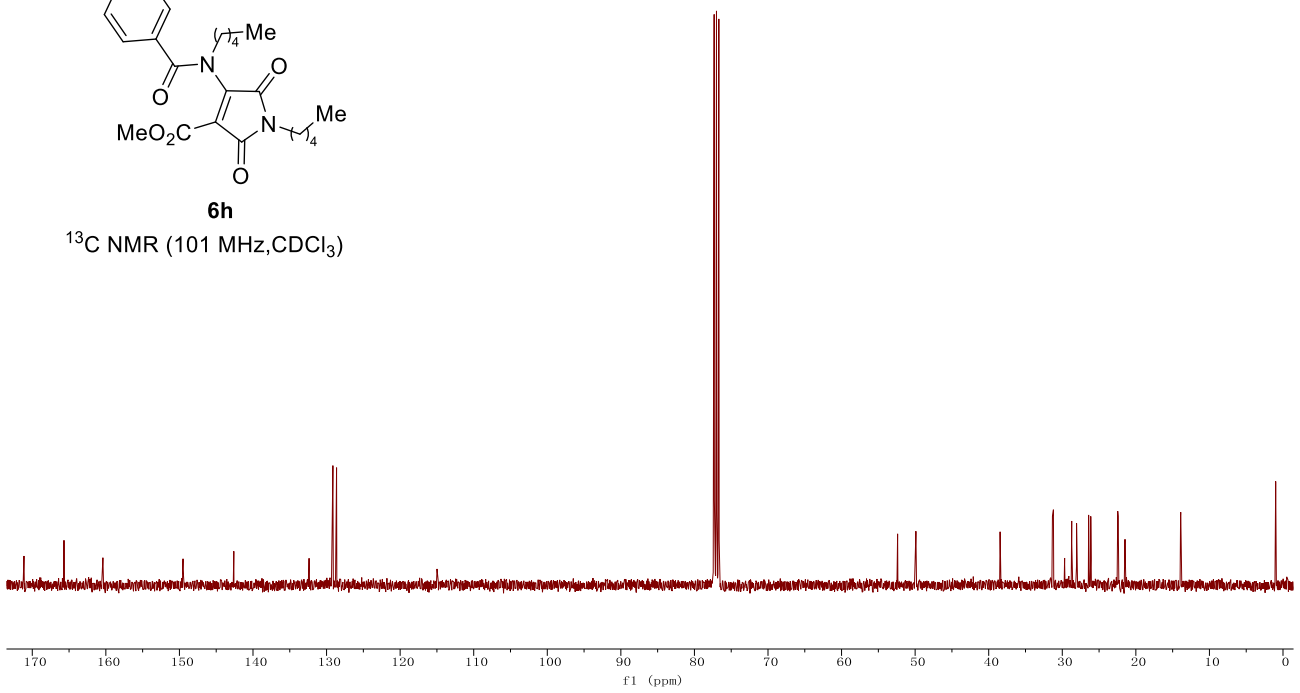

7.333  
7.320  
7.308  
7.291  
7.278  
7.242  
7.230  
7.218  
7.192  
7.186  
7.180  
7.168  
7.163  
7.157  
7.151  
7.144  
7.133  
7.121  
7.108  
7.095  
7.035  
7.024  
6.296  
4.766  
4.607

3.628  
3.625

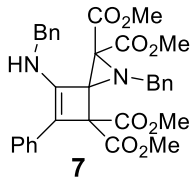

<sup>1</sup>H NMR (600 MHz, CDCl<sub>3</sub>)

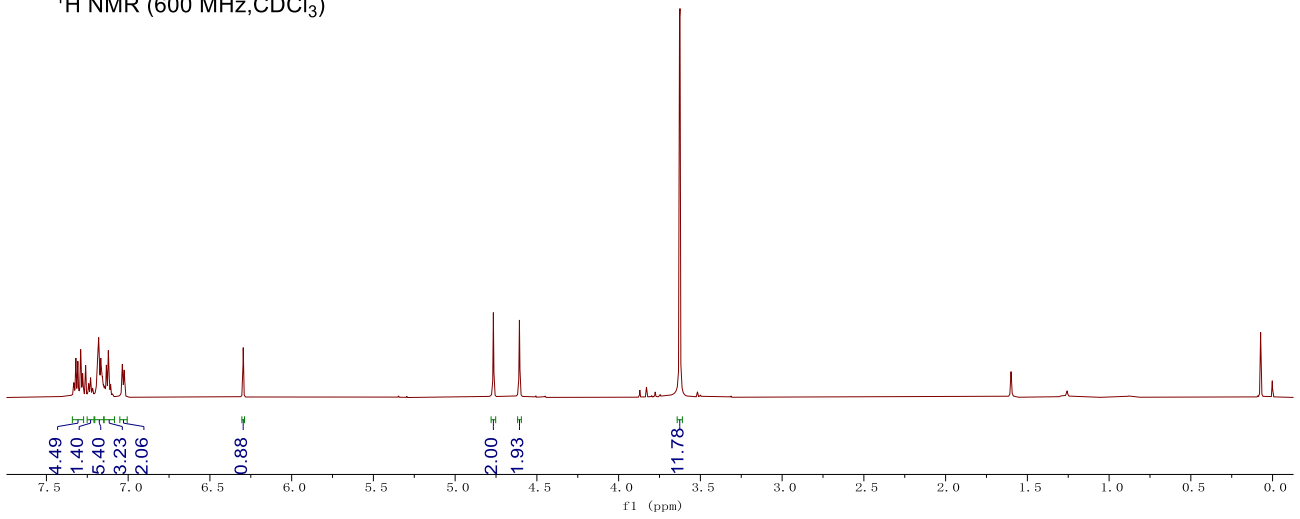

169.01  
167.50  
151.71  
145.48  
139.64  
136.87  
131.82  
128.68  
128.13  
127.82  
127.70  
127.22  
127.04  
126.64  
126.47  
124.35

69.69  
64.10  
55.30  
52.61  
51.86

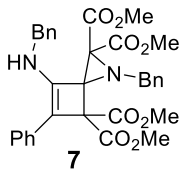

<sup>13</sup>C NMR (151 MHz, CDCl<sub>3</sub>)

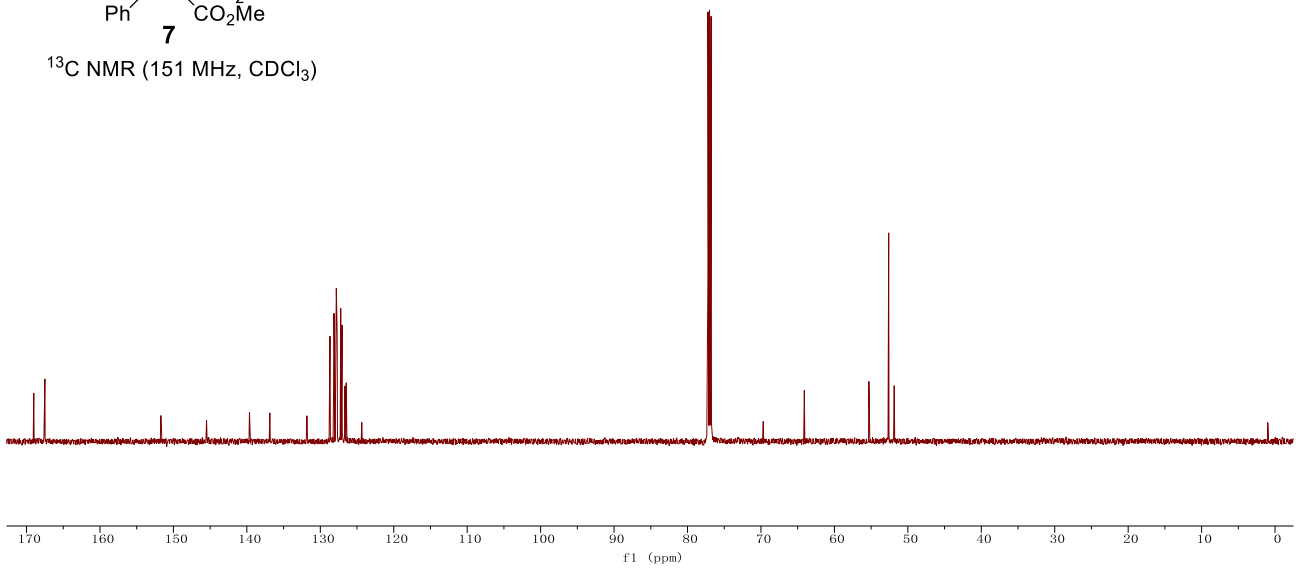

7.343  
7.334  
7.329  
7.321  
7.303  
7.288  
7.279  
7.275  
7.197  
7.191  
7.184  
7.179  
7.170  
7.166  
7.161  
7.061  
7.056  
7.040  
7.037  
6.942  
6.937  
6.928  
6.918  
6.918  
5.432  
5.427  
4.870  
4.832  
4.660  
4.621  
4.569  
4.534  
4.321  
4.317  
4.314  
4.309  
3.826  
3.686  
3.678  
3.532  
3.497

— 1.514

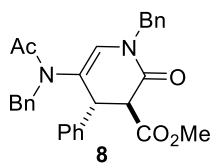

<sup>1</sup>H NMR (400 MHz, CDCl<sub>3</sub>)

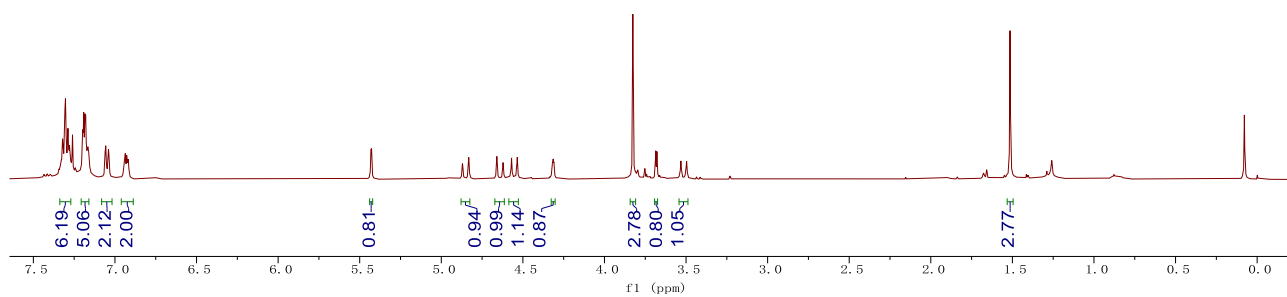

171.33  
169.44  
168.68  
145.12  
139.71  
136.79  
134.51  
129.34  
128.89  
128.72  
128.42  
128.16  
127.98  
127.35  
127.15  
126.94

— 107.65

56.30  
53.32  
50.54  
44.78  
44.39

— 21.60

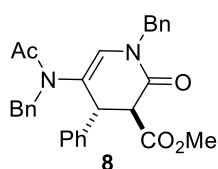

<sup>13</sup>C NMR (101 MHz, CDCl<sub>3</sub>)

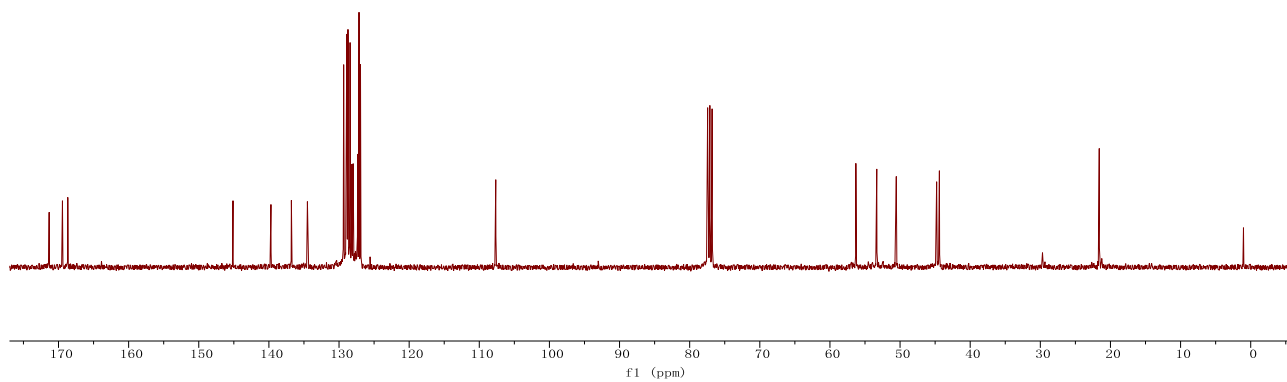

129.34  
128.90  
128.73  
128.43  
128.16  
127.99  
127.35  
127.15  
126.94

— 107.65

— 56.30  
— 53.33

— 44.39

— 21.60

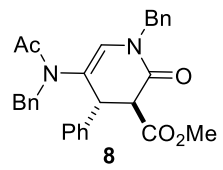

Dept135 NMR (CDCl<sub>3</sub>)

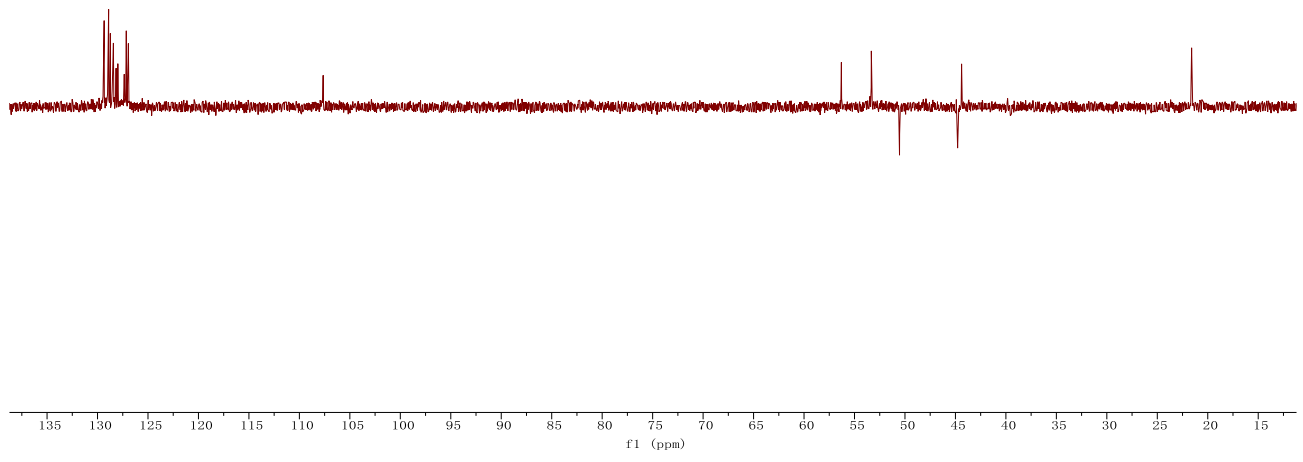

129.34  
128.90  
128.73  
128.43  
128.16  
127.99  
127.35  
127.15  
126.94

— 107.65

— 56.30

— 44.38

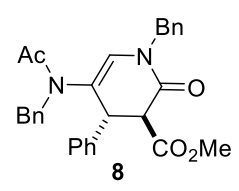

Dept90 NMR (CDCl<sub>3</sub>)

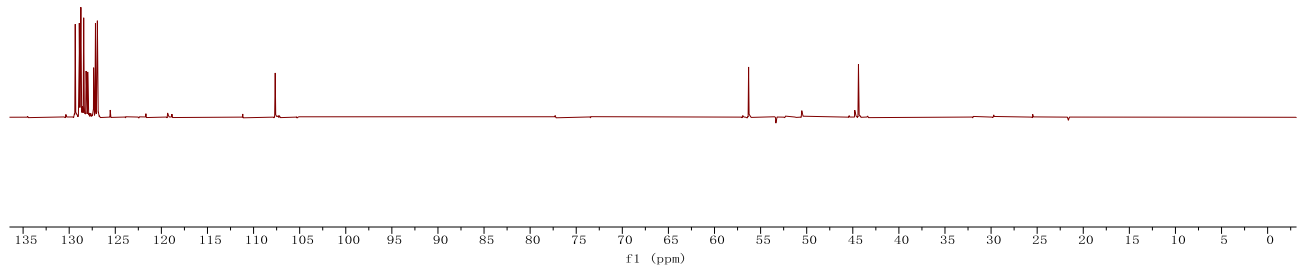

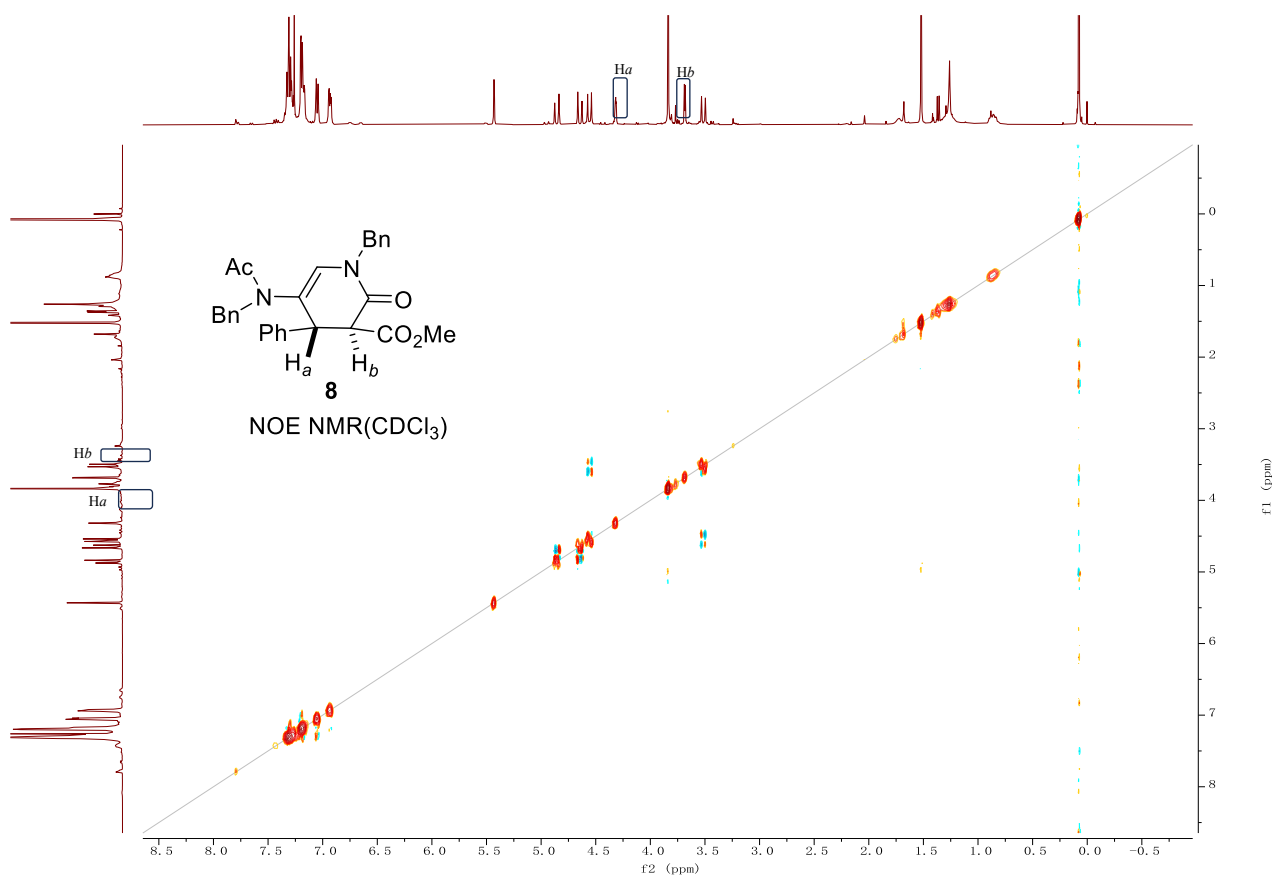



9.484  
7.426  
7.423  
7.413  
7.410  
7.386  
7.374  
7.371  
7.363  
7.361  
7.317  
7.305  
7.239  
7.237  
7.226  
7.224  
7.155  
7.153  
7.143  
7.141  
7.118  
7.114  
7.111  
7.108  
7.106  
7.105  
7.102  
7.101  
7.097  
7.095  
7.018  
7.016  
7.006  
7.004  
6.991  
6.972  
6.959  
6.940  
6.937  
6.935  
6.932  
6.927  
6.924  
6.921  
6.919  
4.864  
4.852  
4.696  
4.686  
4.083  
4.064  
4.058  
4.046  
4.044  
3.875  
3.871  
3.851  
3.847  
1.021  
1.017

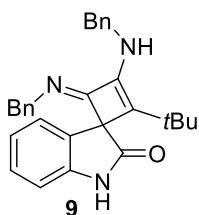

$^1\text{H NMR}$  (600 MHz,  $\text{CDCl}_3$ )

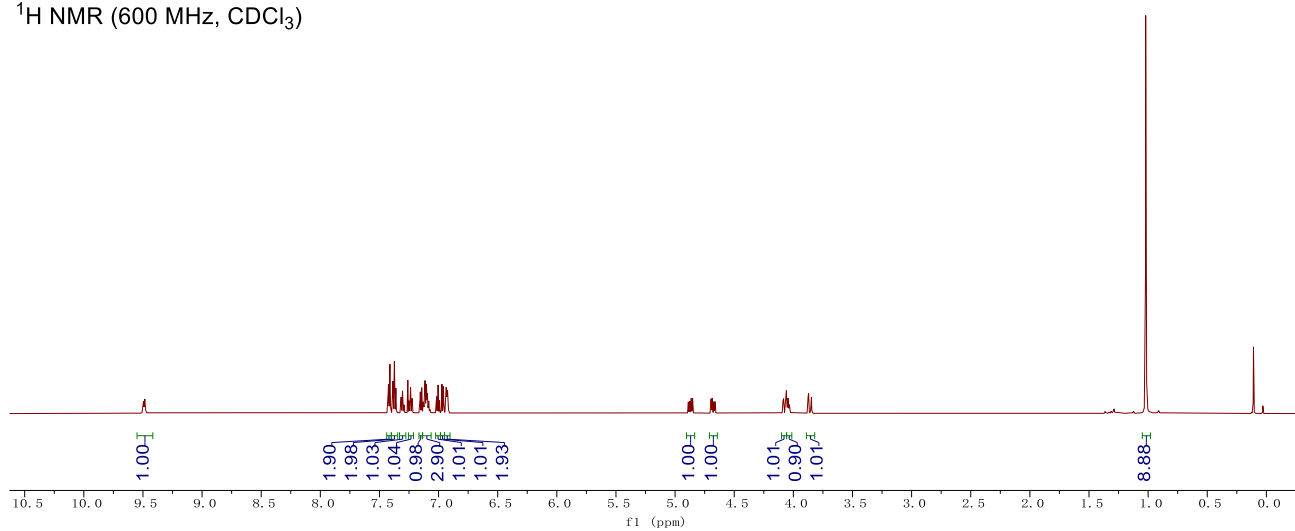

180.11  
155.14  
145.49  
140.59  
140.05  
139.18  
133.00  
129.56  
128.47  
127.93  
127.65  
127.61  
127.09  
126.39  
123.90  
122.42  
110.41  
65.59  
55.34  
48.98  
34.67  
29.12

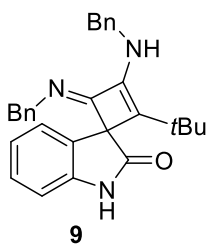

$^{13}\text{C NMR}$  (151 MHz,  $\text{CDCl}_3$ )

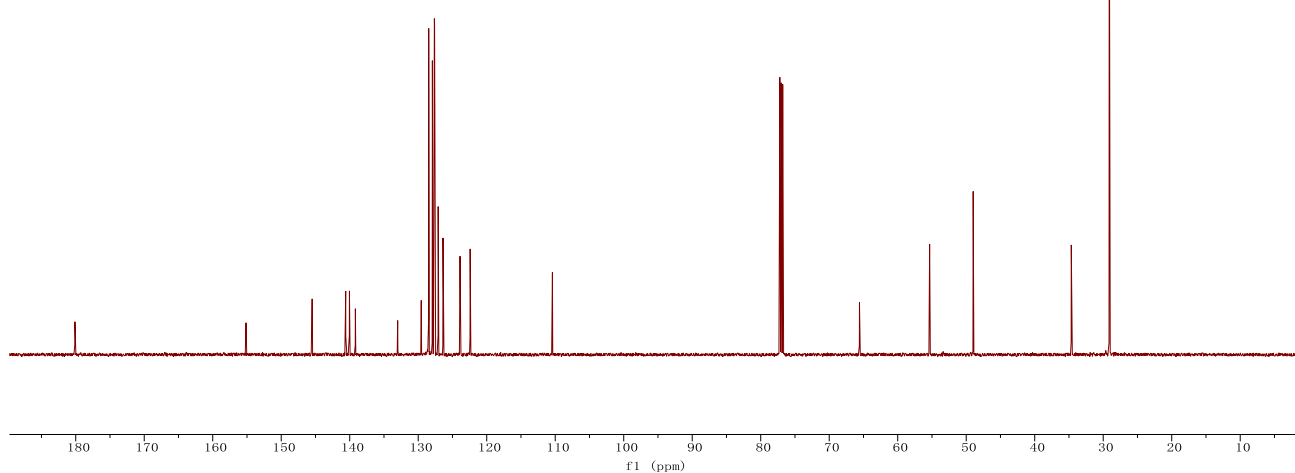

8.029  
7.992  
7.596  
7.566  
7.408  
7.403  
7.398  
7.387  
7.383  
7.378  
7.377  
7.371  
7.368  
7.363  
7.359  
7.355  
7.349  
7.345  
7.340  
7.310  
7.306  
7.300  
7.288  
7.280  
7.275  
7.221  
7.217  
7.202  
7.198  
7.167  
7.153  
7.148  
7.139  
7.134  
7.130  
7.128  
7.119  
7.116  
7.112  
7.109  
6.891  
6.886  
6.880  
6.872  
6.867  
6.794  
6.758  
5.682  
5.652  
4.800  
4.783  
4.749  
4.734  
4.066  
4.018  
3.982  
3.806  
3.775  
3.744  
0.981

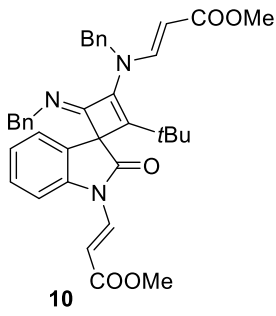

$^1\text{H NMR}$  (400 MHz,  $\text{CDCl}_3$ )

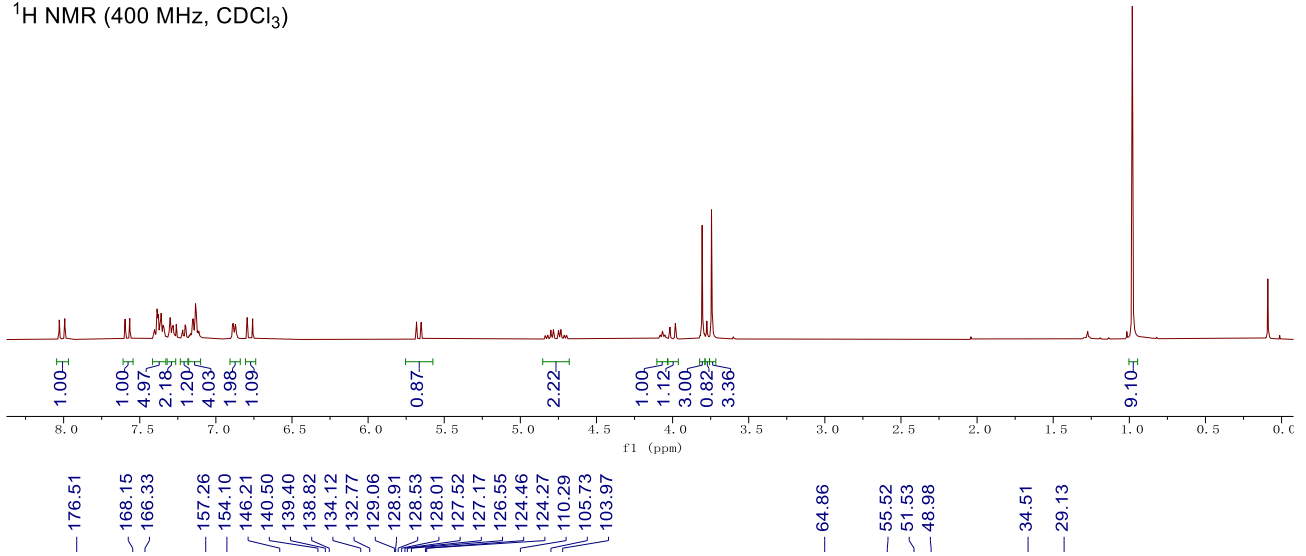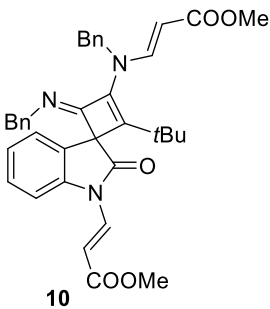

$^{13}\text{C NMR}$  (101 MHz,  $\text{CDCl}_3$ )

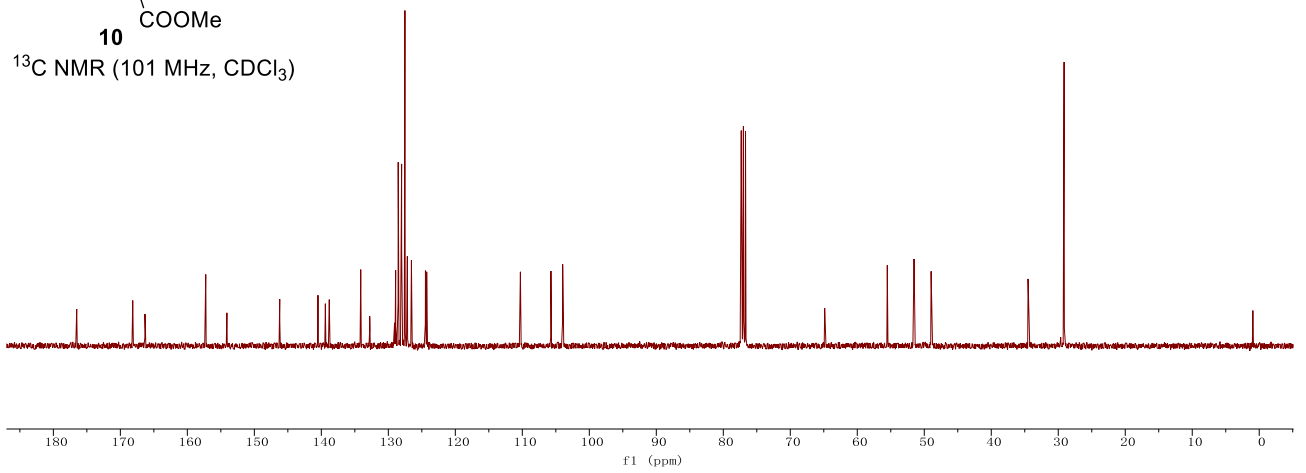

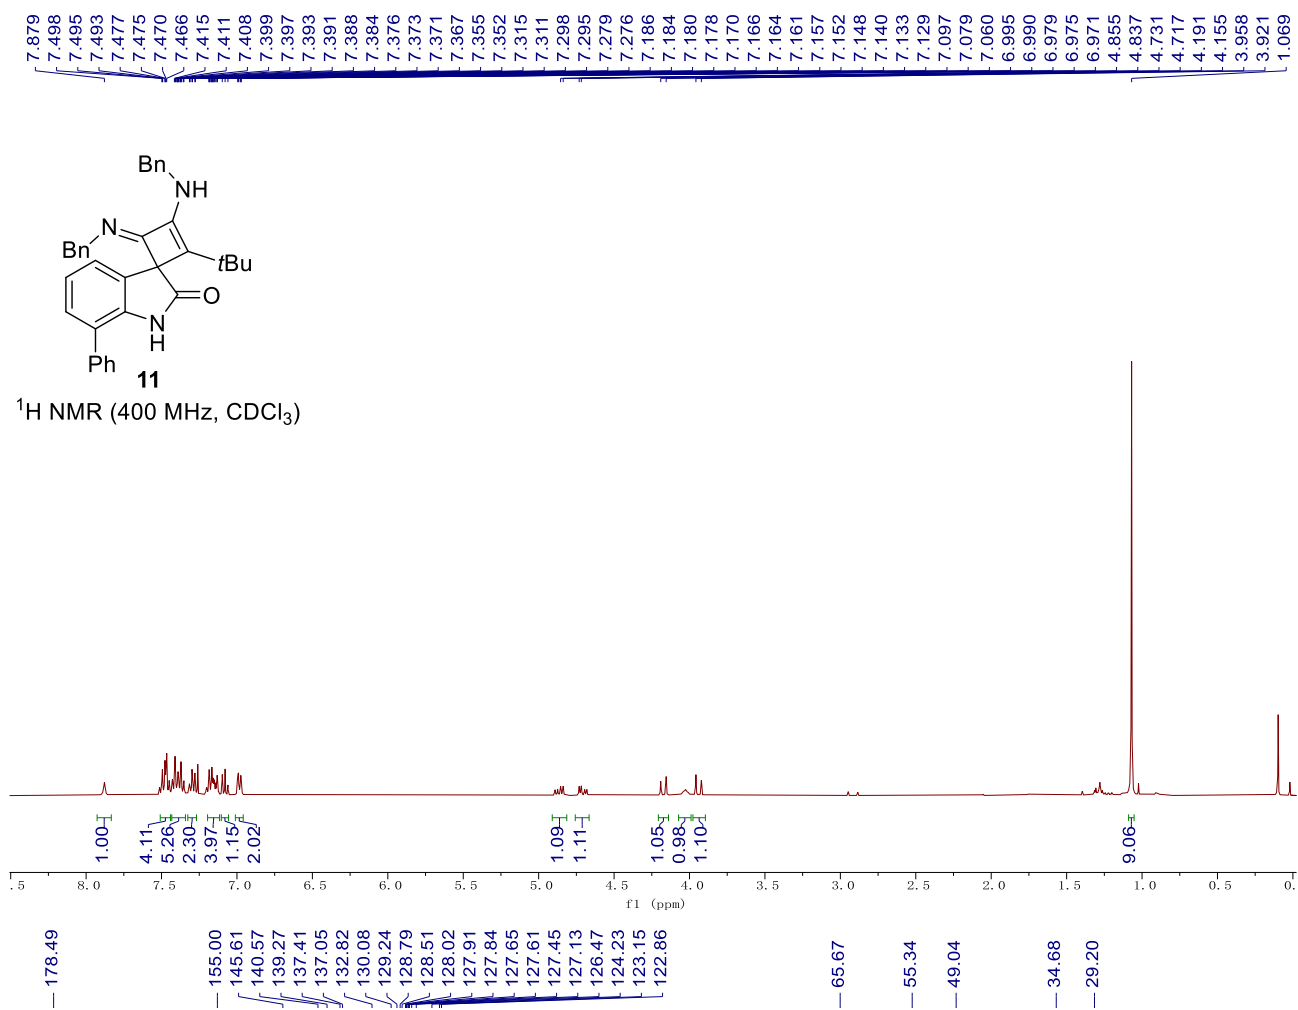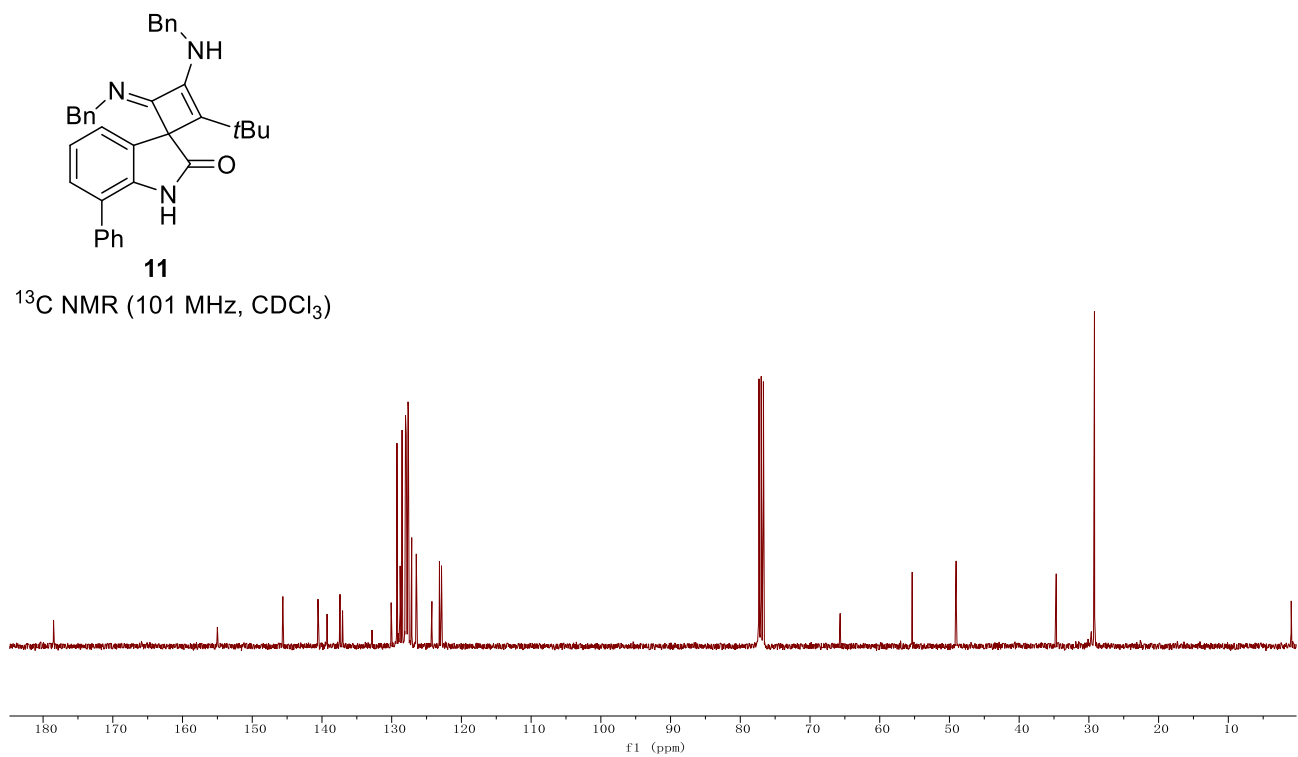

7.464  
7.450  
7.383  
7.372  
7.368  
7.355  
7.343  
7.331  
7.323  
7.299  
7.296  
7.293  
7.285  
7.276  
7.273  
7.259  
7.175  
7.161  
7.150  
7.134  
7.123  
7.111  
7.085  
7.073  
7.053  
7.041  
7.031  
7.028  
7.018  
7.016  
6.967  
6.954  
6.936  
4.793  
4.782  
4.769  
4.758  
4.746  
4.736  
4.722  
4.711  
4.101  
4.077  
4.033  
4.022  
4.011  
3.868  
3.844  
1.577  
— 1.003

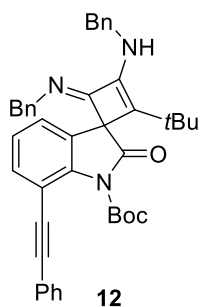

$^1\text{H NMR}$  (400 MHz,  $\text{CDCl}_3$ )

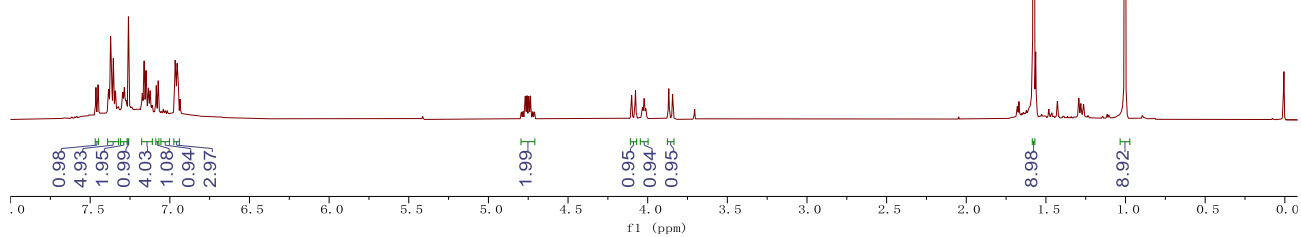

175.62  
153.66  
148.36  
146.16  
140.44  
138.86  
137.80  
133.25  
132.31  
131.97  
128.59  
128.02  
127.56  
127.54  
127.22  
126.52  
125.32  
122.54  
— 107.00  
— 85.25  
— 66.13  
— 55.85  
— 48.99  
— 34.50  
— 29.21  
— 27.65

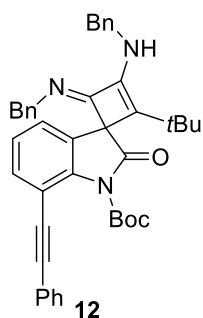

$^{13}\text{C NMR}$  (101 MHz,  $\text{CDCl}_3$ )

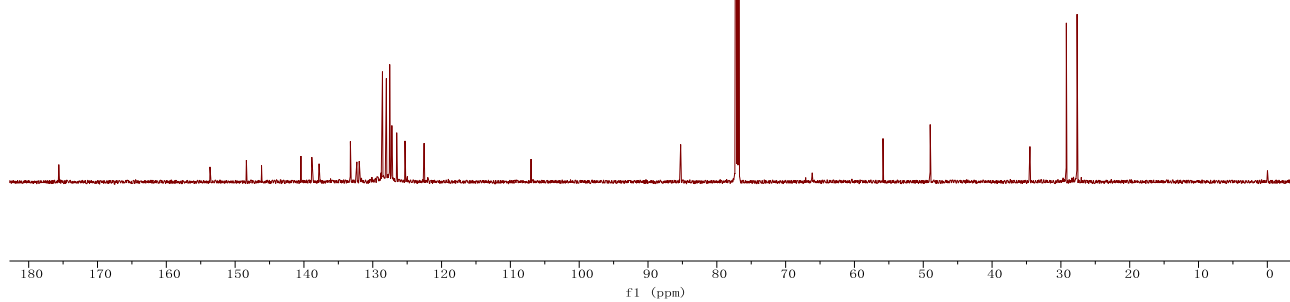

#### 14. Reference

1. a) H. Liu and A. Dömling, *J. Org. Chem.*, **2009**, *74*, 6895-6898. b) P. Patil, *Green Chem.*, **2020**, *22*, 6902–6911. (c) S. Tang, S. M. Ding, D. Li, L. J. Li, H. X. Zhao, M. X. Chai and J. Wang, *Chem Commun.*, **2021**, *57*, 10576–10579.
2. H. Zhou, X. F. Zeng, Y. Xie and G. F. Zhong, *Synlett*, **2015**, *26*, 1693–1696.
3. a) G. Wang, X. H. Liu, T. Y. Huang, Y. L. Kuang, L. L. Lin and X. M. Feng, *Org. Lett.*, **2013**, *15*, 76-79. b) G. Tacconi, L. D. Maggi, P. Righetti, G. Desimoni, O. Azzolina and V. Ghislandi, *J. Chem. Soc., Perkin Trans. 2*, **1976**, 150–154. c) X. H. Zhao, X. H. Liu, Q. Xiong, H. J. Mei, B. W. Ma, L. L. Lin and X. M. Feng, *Chem. Commun.*, **2015**, *51*, 16076-16079. d) S. H. Li, W. M. Yuan and S. M. Ma, *Angew. Chem. Int. Ed.*, **2011**, *50*, 2578–2582.
4. a) P. Hohenberg, W. Kohn, *Phys. Rev.* **1964**, *136*, B864–B871; b) W. Kohn, L. J. Sham, *Phys. Rev.* **1965**, *140*, A1133–A1138.
5. Y. Zhao, D. G. Truhlar, *Theor. Chem. Acc.* **2008**, *120*, 215–241.
6. S. Grimme, J. Antony, S. Ehrlich, H. Krieg, *J. Chem. Phys.* **2010**, *132*, 154104.
7. A. V. Marenich, C. J. Cramer, D. G. Truhlar, *J. Phys. Chem. B* **2009**, *113*, 6378–6396.
8. a) K. Fukui, *J. Chem. Phys.* **1970**, *74*, 4161-4163; b) K. Fukui, *Acc. Chem. Res.* **1981**, *14*, 363–368.
9. M. J. Frisch, G. W. Trucks, H. B. Schlegel, G. E. Scuseria, M. A. Robb, J. R. Cheeseman, G. Scalmani, V. Barone, G. A. Petersson, H. Nakatsuji, X. Li, M. Caricato, A. V. Marenich, J. Bloino, B. G. Janesko, R. Gomperts, B. Mennucci, H. P. Hratchian, J. V. Ortiz, A. F. Izmaylov, J. L. Sonnenberg, D. Williams-Young, F. Ding, F. Lipparini, F. Egidi, J. Goings, B. Peng, A. Petrone, T. Henderson, D. Ranasinghe, V. G. Zakrzewski, J. Gao, N. Rega, G. Zheng, W. Liang, M. Hada, M. Ehara, K. Toyota, R. Fukuda, J. Hasegawa, M. Ishida, T. Nakajima, Y. Honda, O. Kitao, H. Nakai, T. Vreven, K. Throssell, J. A. Jr. Montgomery, J. E. Peralta, F. Ogliaro, M. J. Bearpark, J. J. Heyd, E. N. Brothers, K. N. Kudin, V. N. Staroverov, T. A. Keith, R. Kobayashi, J. Normand, K. Raghavachari, A. P. Rendell, J. C. Burant, S. S. Iyengar, J. Tomasi, M. Cossi, J. M. Millam, M. Klene, C. Adamo, R. Cammi, J. W. Ochterski, R. L. Martin, K. Morokuma, O. Farkas, J. B. Foresman, D. J. Fox, *Gaussian 16*, revision B.01, Gaussian, Inc.: Wallingford, CT, 2016.
